# Supplementary material for: Giraffe genome sequence reveals clues to its unique morphology and physiology
Source: PubMed Central journal article supplement — Nat Commun. 2016 May 17;7:11519. doi: 10.1038/ncomms11519 (PMC4873664; doi:10.1038/ncomms11519), 2016-05-17
Supplement: ncomms11519-s1.pdf [file ncomms11519-s1.pdf]

## Supplementary Figure 1

### Genes showing multiple signs of adaptation (MSA)

#### Locus Name: Folate receptor 1 alpha (FOLR1)

ENSBTAT00000027602 FOLR1-201 folate receptor embryogenesis, folate homeostasis  
 mouse: growth retardation, neural and cranofacial defects die at E10

PSG: (Giraffe) G47S|GGC/AGC; P48S|CCA/TCT; K61E|AAG/GAG; E222K|GAG/AAG; G235Q|GGG/CAG

PP2: (Giraffe) P49S, E223K;(Giraffe/Okapi) D51S, A22Q

Giraffe: P48S UPS, E54G UPS, R122T UPS, E222K UIS, G235Q UPS

Okapi: A20S UPS

#### Protein sequence Alignment of Cow, Giraffe and Okapi FOLR1

|         |     |                                                                  |     |
|---------|-----|------------------------------------------------------------------|-----|
| Cow     | 1   | MAWQMTQLLLLALVAAAWGAQAPRTPRARTDLLNVCM DAKHHKAE PGPEDSLHEQCSPWR   | 60  |
| Giraffe | 1   | ...K.....V.G.....N.....SS.S...G.....                             | 60  |
| Okapi   | 1   | ...K.....S.V.G.....N.....S.....                                  | 60  |
| Cow     | 61  | KNACCSVNTSIEAHKDISYLYRFNWDHCGKMEPACKRHF IQDTCLYECS PNLG P WIREVN | 120 |
| Giraffe | 61  | E.....                                                           | 120 |
| Okapi   | 61  | .....                                                            | 120 |
| Cow     | 121 | QRWRKERV LGVPLCKEDCQSWWEDCRTSYTCKSNWHK GWNWTS GYNQCPVKAACHRFDFY  | 180 |
| Giraffe | 121 | .T.....N.....I.....R..D.....                                     | 180 |
| Okapi   | 121 | .S.....N.....I.....R..D.....                                     | 180 |
| Cow     | 181 | FPTPAALCNEIWSHSYKVS NYSRGSGRCIQMWFDPFQGNPNEEVARFYAENPTSGSTPQG    | 240 |
| Giraffe | 181 | .....G.....K.....N.Q.....                                        | 240 |
| Okapi   | 181 | .....G.....N.....                                                | 240 |
| Cow     | 241 | I                                                                |     |
| Giraffe | 241 | .                                                                |     |
| Okapi   | 241 | .                                                                |     |

#### Newick Tree of Mammalian FOLR1

```
(dog:0.0755681, (horse:0.0677606, (bushbaby:0.073823, (manatee:0.0839709, ((human:0.10683,
(rhino:0.0803279, ((walrus:0.00727225, weddel_seal:0.0126104):0.065253,
cat:0.0713098):0.0423044):0.00400162):0.0122881, elephant:0.118106):0.0159987,
((dolphin:0.0509221, (orca:0.0171223, ((sperm_whale:0.0137419,
baiji_dolphin:0.0138767):0.000462631, minke_whale:0.041772):0.0109803):0.0150048):0.0134242,
((cow:0.00287772, yak:0.00545576):0.00515902, ((tibetan_antelope:0.00599731,
sheep:0.00962865):0.013353, (giraffe:0.0273562,
okapi:0.00815797):0.0355917):0.00359502):0.0559345):0.0372389):0.0352274):0.0517348):0.0053625):0.0755681);
```

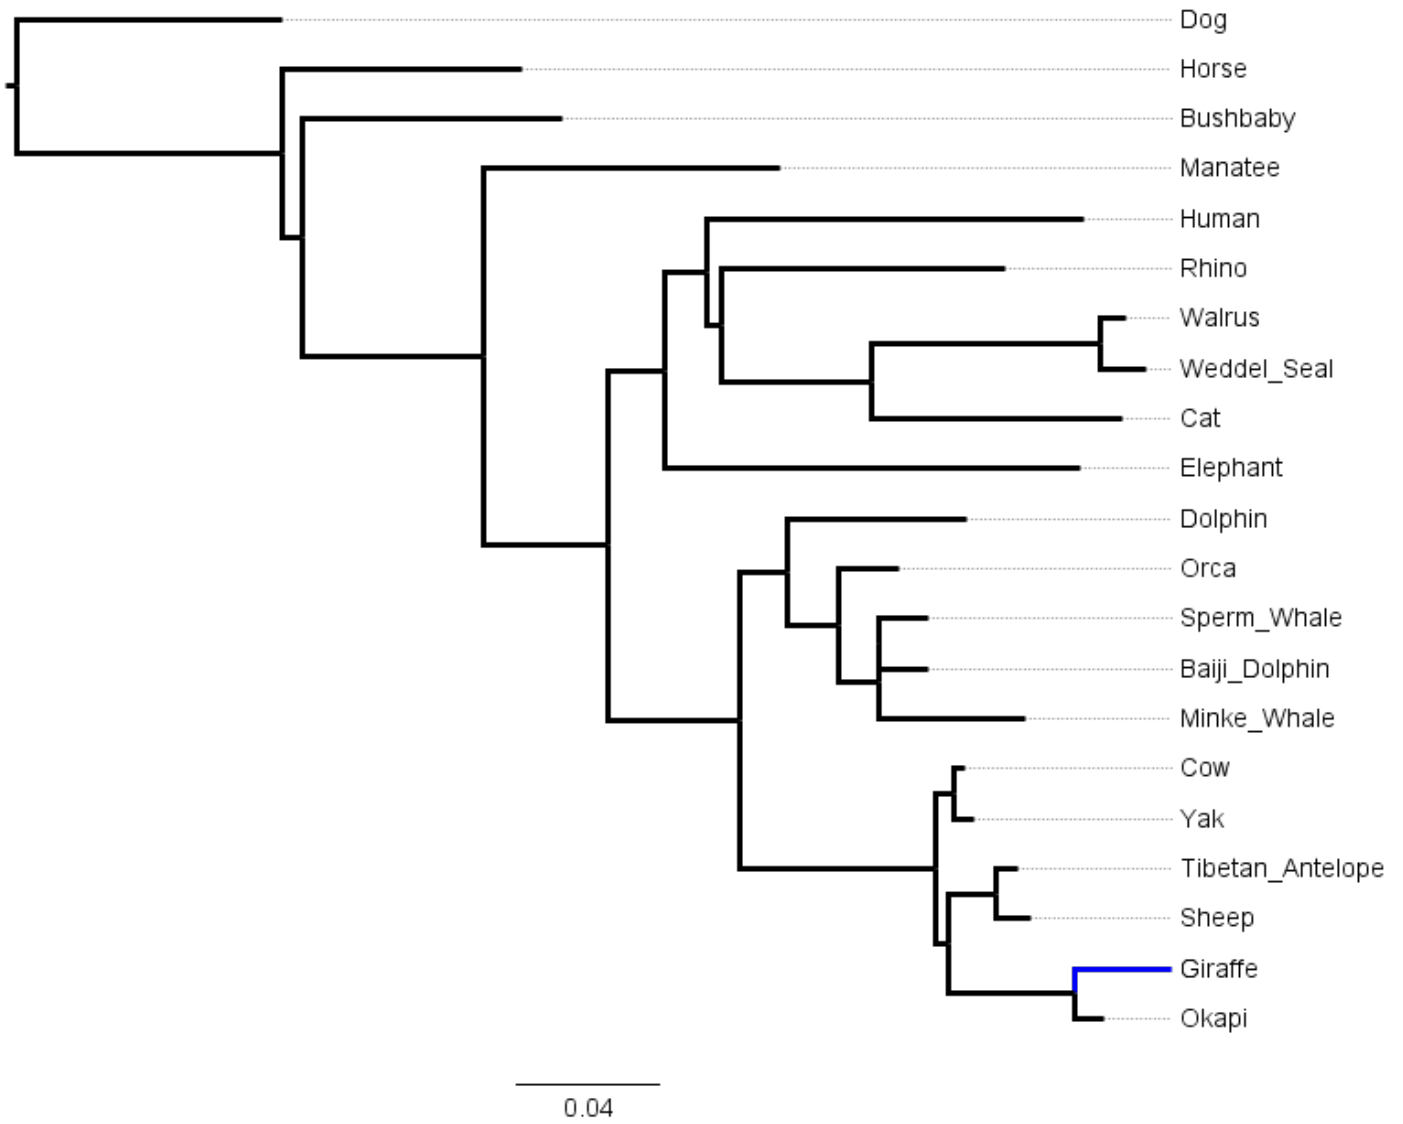

**Locus Name: Folate receptor 1 alpha (FOLR1)**

**Locus Name: Homeobox B3 (HoxB3)**

ENSBTAT0000028563 HOXB3-201 homeobox transcription factor segmental identity, anterior axial skeleton, angiogenesis  
mouse: defects in cervical vertebrae, atlas, formation of IXth cranial nerve

PP2: (Giraffe) S98I; (Giraffe/Okapi) M282I, P403A

Giraffe: S98I UIS, G113S UPS,  
Giraffe/Okapi: P115S UIS, M77I UIS, P398A UIS

**Protein sequence Alignment of Cow, Giraffe and Okapi HoxB3**

|         |     |                                                               |     |
|---------|-----|---------------------------------------------------------------|-----|
| Cow     | 1   | MQKATYYDNTAAALFGGYPSYPGSNGFGYDGGPPPPQAATHLESYQRSACSLQSLGNA    | 60  |
| Giraffe | 1   | .....E.....G                                                  | 60  |
| Okapi   | 1   | .....                                                         | 60  |
| Cow     | 61  | APHAKGKELNGSCMRPGLASEPLPAPPSPPPSAAPTSTTSNSSNGGGPSKSGPPKCGAG   | 120 |
| 14540   | 61  | .....S.....I.....S.S.....                                     | 120 |
| 14541   | 61  | .....S.....S.....                                             | 120 |
| Cow     | 121 | SNSTLTKQIFPWMKESRQTSKLNSSPGTAEGCGSGGGGGGGSSGGGGGGGDKSPPGS     | 180 |
| 14540   | 121 | .....G.....G.....                                             | 183 |
| 14541   | 121 | .....G.....G.....                                             | 184 |
| Cow     | 181 | AASKRARTAYTSAQLVELEKEFHFNRYLCRPRRVEMANLLNLSEKIQIKIWFQNRMMKYKK | 240 |
| 14540   | 184 | .....                                                         | 243 |
| 14541   | 185 | .....                                                         | 244 |
| Cow     | 241 | DQKAKGLASSSGGPPSPAGSPSQPMQSTAGFMNALHSMTPSYESPPPAFGKAHQNAYALP  | 300 |
| 14540   | 244 | .....I.....                                                   | 303 |
| 14541   | 245 | .....I.....                                                   | 304 |
| Cow     | 301 | SNYQPPLKGC GAPQKYPQTPAPDYEPHVLTNGGAYGTPMQGSPVYVGGGGYADPLPPP   | 360 |
| 14540   | 304 | .....                                                         | 363 |
| 14541   | 305 | .....                                                         | 364 |
| Cow     | 361 | AGPSLYGLNHLSSHPSGNLDYNGAPPMAFSQHGGPCDPHTYTDLSSHAPPQGRIQEA     | 420 |
| 14540   | 364 | .....A.....                                                   | 423 |
| 14541   | 365 | .....A.....                                                   | 424 |
| Cow     | 421 | PKLTHL                                                        | 427 |
| 14540   | 424 | .....                                                         | 430 |
| 14541   | 425 | .....                                                         | 431 |

**Newick Tree of Mammalian HoxB3**

(manatee:0.0134567, ((cow:0.00638513, (giraffe:0.00908205, okapi:0.00026395):0.0078677):0.0164519, ((rat:0.011867, mouse:0.00691398):0.0138423, (dog:0.00532972, (walrus:0.00233832, cat:0.0118133):0.00175755):0.00524476):0.00171903, (orca:0.0111089, ((pig:0.00334083, rhino:0.0107775):0.00188319, (starmole:0.0156363, (baboon:0.0085923, (human:0.00948222, orangutan:0.0117216):0.000754308):0.00750944):0.00152221):0.000185431):0.000854271):0.00283764):0.0134567);

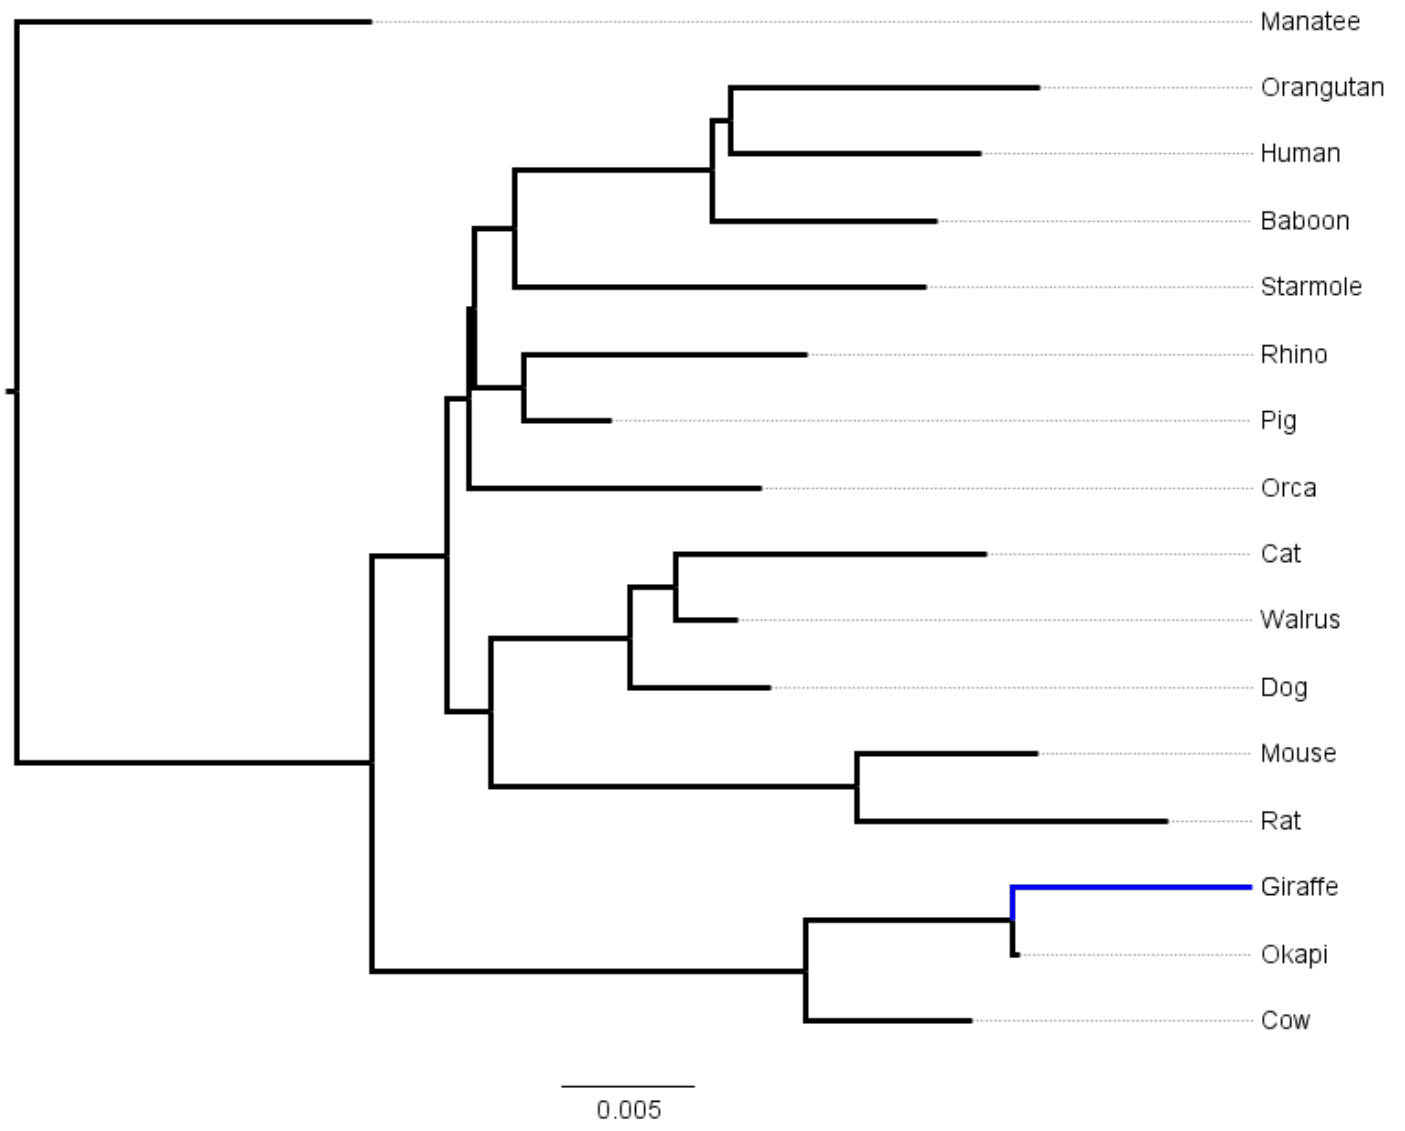

**Locus Name: Homeobox B3 (HoxB3)**

**Locus name Homeobox B13 (HOXB13)**

ENSBTAT00000019523 HOXB13-201 homeobox transcription factor segmental identity, posterior axial skeleton, angiogenesis  
mouse: caudal vertebrae and angiogenesis impaired and overgrowth in all major structures derived from the tail bud

PP2 (Giraffe/Okapi): S122I, H160R, W195C

Giraffe: A108G UPS

Giraffe/Okapi: S123I unique, APVP deletion unique, H160R UIS, W196C UIS,

**Protein sequence Alignment of Cow, Giraffe and Okapi HOXB13**

|         |     |                                                                |     |
|---------|-----|----------------------------------------------------------------|-----|
| Cow     | 1   | MEPSNYTTLDGAKEIEGLLGAGGSRNLVTHSPLTSHPTSAPTLM PAVNYAPLDLPGSAEP  | 60  |
| Giraffe | 1   | ...G.....T.....AA.....                                         | 60  |
| Okapi   | 1   | ...G.....AA....L.....                                          | 60  |
|         |     |                                                                |     |
| Cow     | 61  | PKQCHPCPGVPQGAS PAVPYGYFGGGYISCRVSRSSLKPCAQAATLAAYPAETPTS GEE  | 120 |
| Giraffe | 61  | .....G.....A....                                               | 116 |
| Okapi   | 61  | .....T.....A....                                               | 116 |
|         |     |                                                                |     |
| Cow     | 121 | YPSRPTTEFAFYPGYPGYPQMASYLDVSVVQTLGAPGEP RHDSL LPVDSYQPWALTGGWN | 180 |
| Giraffe | 117 | ..I.....S.....V.....R.....S.....S...                           | 176 |
| Okapi   | 117 | ..I.....S.....V.....R.....S.....S...                           | 176 |
|         |     |                                                                |     |
| Cow     | 181 | SQMCCQGEQNPPGPFWKAAAFADSSSQHPPEGCTFR RGRKKRIPYSKGQLRELEREYSANK | 240 |
| Giraffe | 177 | .....S.C.....V....D..A.....                                    | 236 |
| Okapi   | 177 | .....S.C.....V....D..AL.....                                   | 236 |
|         |     |                                                                |     |
| Cow     | 241 | FITKDKRRKISAATSLSERQITIW FQNRRVKEKKVLAKVKTS                    | 282 |
| Giraffe | 237 | .....L...                                                      | 278 |
| Okapi   | 237 | .....L...                                                      | 278 |

**Newick Tree of Mammalian HOXB13**

(rabbit:0.0180279, ((dog:0.00423827, (walrus:0.00170297, cat:0.0124487):0.002849):0.00610416, ((orca:0.0112771, ((rhino:0.0117203, starmole:0.0151466):0.00120006, (human:0.0095166, orangutan:0.0116872):0.000328021, baboon:0.00901859):0.00711139):0.000839773):0.00113203, ((pig:0.00433482, (rat:0.0115056, mouse:0.00727538):0.013488):0.000606871, (manatee:0.0266819, (cow:0.00537304, (giraffe:0.00941327, okapi:0):0.00887979):0.0166834):0.00225322):0.000864063):0.000653822):0.0180279);

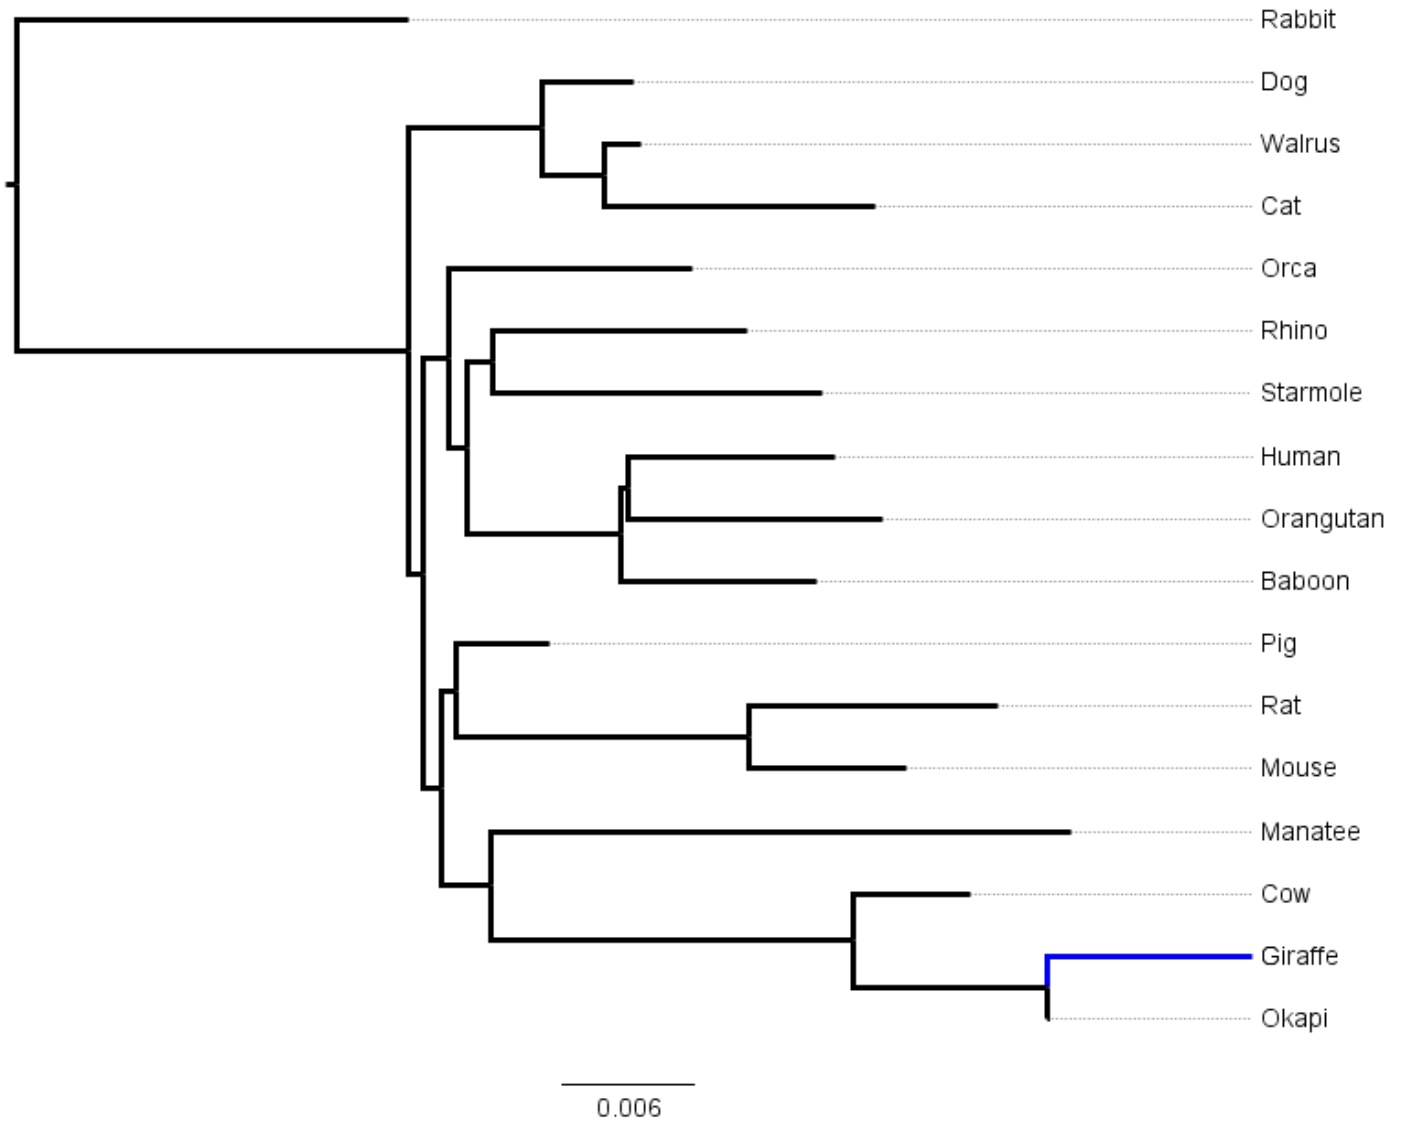

Locus name Homeobox B13 (HOXB13)

**Locus Name: Homeobox D9 (HOXD9)**

ENSBTAT0000021336 HOXD9-201 HoxD9 homeobox transcription factor segmental identity, mid axial skeleton, forelimb development, angiogenesis  
mouse: abnormalities in forelimb, lumbar, sacral, caudal vertebrae

Giraffe: G124S UIS, GAGIGSGS deletion 219-226 UIS in cetartiodactyls  
Okapi: S255L UPS

**Protein sequence Alignment of Cow, Giraffe and Okapi HOXD9**

|         |     |                                                               |     |
|---------|-----|---------------------------------------------------------------|-----|
| Cow     | 1   | MSSSGTLSNYYVDSLIGHEGDEVFAGRFGPPGPGAQGRPAGVADSPAAAAAEFASCSFAP  | 60  |
| Giraffe | 1   | .....                                                         | 60  |
| Okapi   | 1   | .....                                                         | 60  |
|         |     |                                                               |     |
| Cow     | 61  | KSAVFSASWSAVPAQPPAAAAAMSGLYHPYVPPPPLAASASEPGRYMRSWMEPLPGFPGGA | 120 |
| Giraffe | 61  | .....                                                         | 120 |
| Okapi   | 61  | .....                                                         | 120 |
|         |     |                                                               |     |
| Cow     | 121 | GGGGGGGSGGGPGPGSPGSPGNRHYGIKPESGAAPTAAASTTSTSSSSSSSK          | 180 |
| Giraffe | 121 | ..SS..G.....-.....                                            | 179 |
| Okapi   | 121 | .S..S..G.....-.....                                           | 179 |
|         |     |                                                               |     |
| Cow     | 181 | RTECSAARESQQSGGPEFSCNSFLRDKVAAAAAGGTGPGAGIGSGGAGGTSEPSACSDH   | 240 |
| Giraffe | 180 | .....-.....S.....                                             | 231 |
| Okapi   | 180 | .....S.....                                                   | 239 |
|         |     |                                                               |     |
| Cow     | 241 | PSPGCPLKEEEKQHSQAPQQQLDPNNPAANWIHARSTRKKRCPYTKYQTTLELEKEFLFNM | 300 |
| Giraffe | 232 | .....                                                         | 291 |
| Okapi   | 240 | .....L.....                                                   | 299 |
|         |     |                                                               |     |
| Cow     | 301 | YLTRDRRYEVARILNLTERQVKIWFQNRMRMKMKMSKEKCPKGD                  | 345 |
| Giraffe | 292 | .....                                                         | 336 |
| Okapi   | 300 | .....                                                         | 344 |

**Newick Tree of Mammalian HOXD9**

(dog:0.0260126, ((walrus:0.0305933, weddel\_seal:0.0422303):0.0151606, (cat:0.0193117, (((human:0.00726759, rhesus\_monkey:0.00335218):0.0218061, (manatee:0.0227011, (mouse:0.006319, rat:0.000698627):0.0322236, rabbit:0.0241599):0.00187279):0.00376309):0.00384313, bushbaby:0.0317558):0.00409975, (horse:0.0186464, rhino:0.0134474):0.00803063, ((sperm\_whale:0.00335994, (orca:0, dolphin:0.00353369):0.000161231):0.000527845, baiji\_dolphin:0.00299333):0.00476691, (pig:0.0284483, (camel:0.00906115, alpaca:0.0194144):0.0316376, (Giraffe:0.00771686, Okapi:0.0102379):0.0404145, ((sheep:0.0109289, tibet\_antelope:0.00677159):0.00652728, (water\_buffalo:0.00528391, (Cow:0.00713736, yak:0):0.00890192):0.00786959):0.00178088):0.00657298):0.00225435):0.00289114):0.0023088):0.0051923):0.0114512):0.0179872):0.0260126);

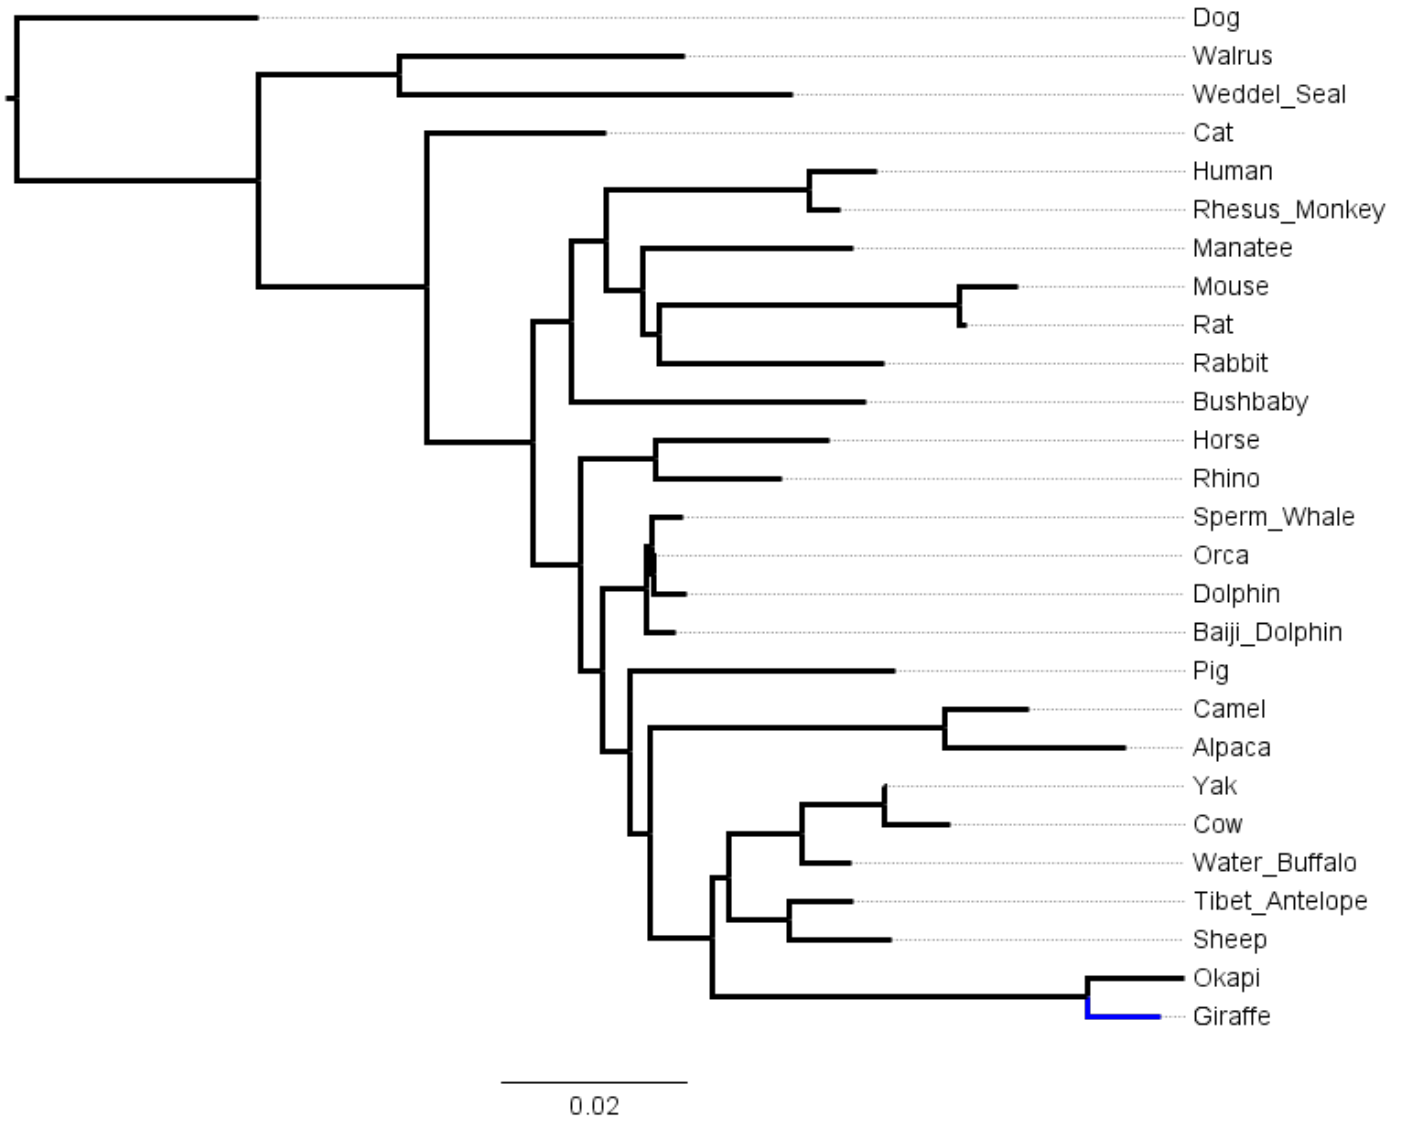

Locus Name: Homeobox D9 (HOXD9)



**Locus Name: Caudal Type Homeobox 4 (CDX4)**

ENSBTAT0000002260 CDX4-201 homeobox transcription factor segmental identity, posterior axial skeleton, heart development mouse: defects in axial skeleton development

PP2: (Giraffe) S250C; (Giraffe/Okapi) D140N; (Okapi) V246M

Giraffe: M93T UPS, S251C UIS

Giraffe/Okapi: T130P UPS, N140D UIS

**Protein sequence Alignment of Cow, Giraffe and Okapi CDX4**

|         |     |                                                              |     |
|---------|-----|--------------------------------------------------------------|-----|
| Cow     | 1   | MYRSCLEKEADMYSSTLRSPAGGGTAGAGATGDGGSPLPASNFAAAPSIAHYMGYPHMP  | 60  |
| Giraffe | 1   | .....S.....F..D.....                                         | 60  |
| Okapi   | 1   | .....P.....D.....                                            | 60  |
|         |     |                                                              |     |
| Cow     | 61  | GMDPHGPPPLGAWGSPYSPREDWSVYPGPSSTMGTVPMNDMSSSPAAFSSLEYSNLGPAG | 120 |
| Giraffe | 61  | .....Q...T.....T.....P.....                                  | 120 |
| Okapi   | 61  | .....V...T.....P.....                                        | 120 |
|         |     |                                                              |     |
| Cow     | 121 | GGNSGSSLPTPAGGSLFPIDAGIADADESSRSRHSPIAWMRKTVQVTGKTRTKEKYRVV  | 180 |
| Giraffe | 121 | .....P.....N...--.....                                       | 178 |
| Okapi   | 121 | .....P.....N...--..V.....                                    | 178 |
|         |     |                                                              |     |
| Cow     | 181 | YTDHQRLLEKEFHCNRYITIRRKSELAVNLGLSERQVKIWFQNRRAKERKMIKKKISQF  | 240 |
| Giraffe | 179 | .....I.....                                                  | 238 |
| Okapi   | 181 | .....                                                        | 238 |
|         |     |                                                              |     |
| Cow     | 241 | ENSGGSVQSDSGSISPGELPNIFFTTPSAVRGFQPIEIQQVIVSE                | 285 |
| Giraffe | 239 | .....C.....T.....                                            | 283 |
| Okapi   | 241 | .....M....D.....T.....                                       | 283 |

**Newick Tree of Mammalian CDX4**

(aardvark:0.0709835, (manatee:0.0414927, elephant:0.0743496):0.0375359, ((rhino:0.0313596, horse:0.0229299):0.0149351, ((Macaque:0.0334678, (orangutan:0.0167002, human:0.0228125):0.0104206):0.0451086, (mouse:0.0197583, rat:0.0126827):0.0823364, (walrus:0.0141256, weddell\_seal:0.0108337):0.0598136):0.00930766):0.00360017, ((alpaca:0.00985501, Camel:0.00790838):0.0312197, (pig:0.0586732, (minke\_whale:0, (orca:0.0070139, sperm\_whale:0.0072217):0.000161725):0.0204831, (giraffe:0.022068, okapi:0.0175872):0.00900926, ((tibetan\_antelope:0.00264641, (sheep:0.00257207, goat:0.00096776):0.00267596):0.000454067, (water\_buffalo:0.00355976, (cow:0, yak:0.00357891):0.00354521):0.000438041):0.008455):0.0199578):0.00783972):0.00457048):0.010958):0.00487198):0.0541789):0.0709835);

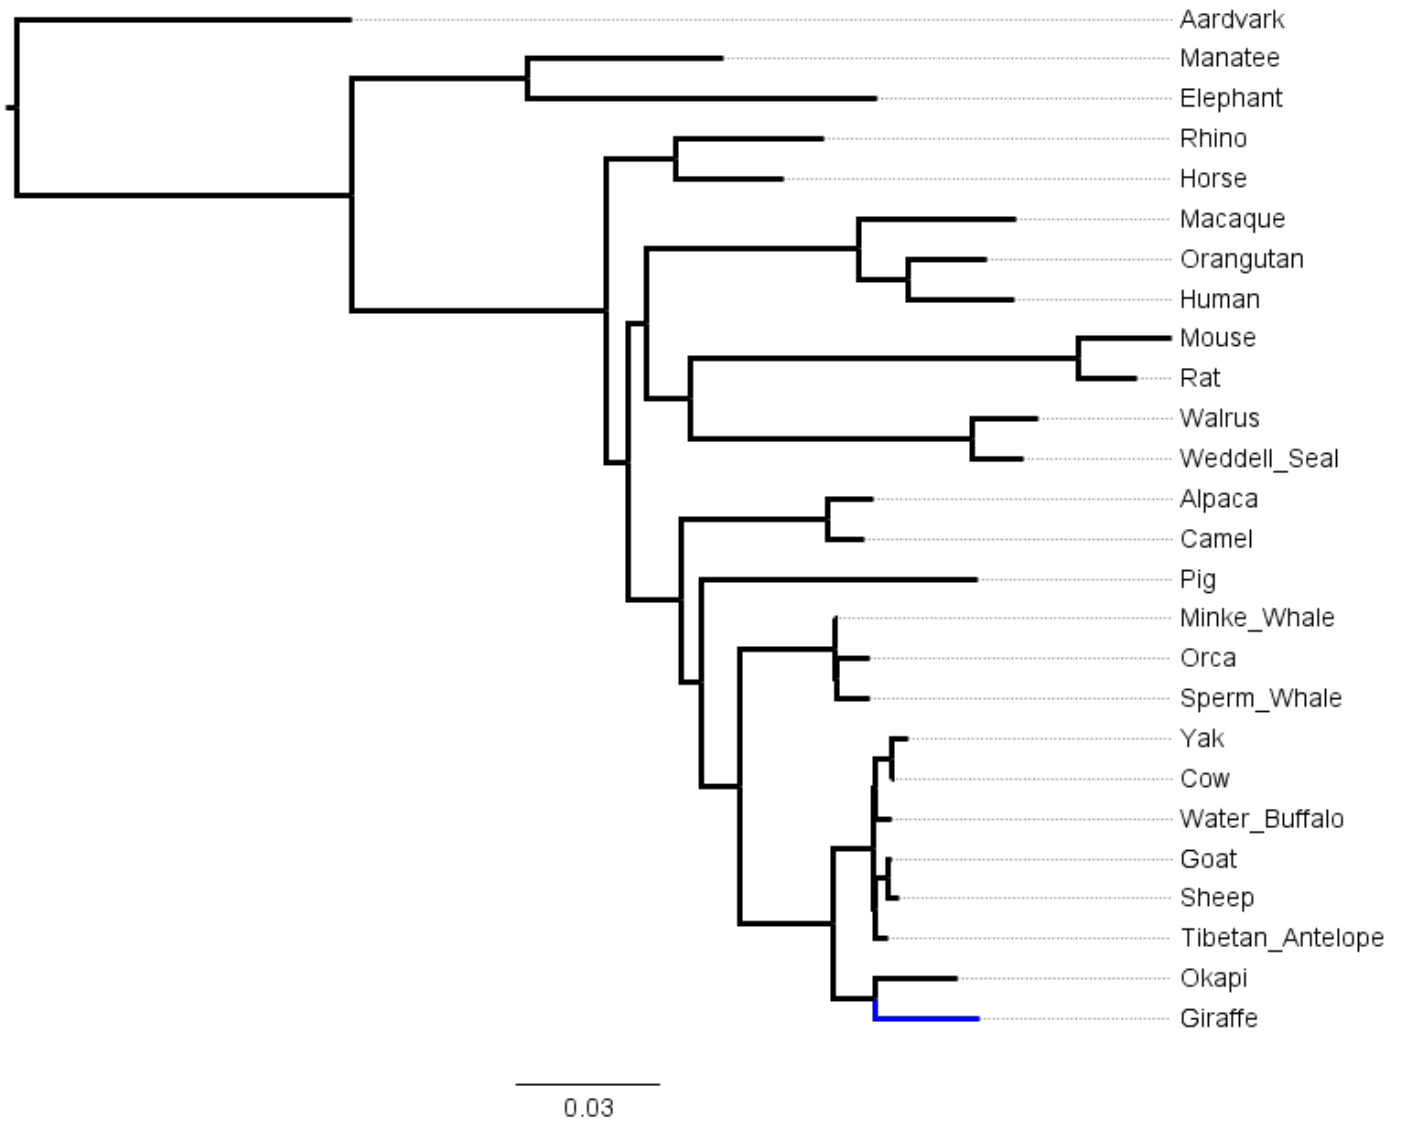

**Locus Name: Caudal Type Homeobox 4 (CDX4)**

**Locus Name: Homeobox protein notochord (NOTO)**

ENSBTAT00000047327 NOTO-202 homeobox transcription factor embryonic somitogenesis,  
mouse: notochord, axial skeleton, axial vs paraxial cell fate

PP2: (Giraffe) G98R, Y223H

Giraffe: Q115R UPS, D162G UIS, Y223H UIS, A257S UPS

Giraffe/Okapi: R23H UPS, H81Y UPS, LP105-106PR UIS, H191Q UIS

**Protein sequence Alignment of Cow, Giraffe and Okapi NOTO**

|         |     |                                                              |     |
|---------|-----|--------------------------------------------------------------|-----|
| Cow     | 1   | MPSPGPRGCRPLPLSGAGVQQRSSRSRPPASPALPRGSANPGPARAPGRGLASSFSVEAI | 60  |
| Giraffe | 1   | .....L....V...PH..G..G.....V....P.....V.....                 | 60  |
| Okapi   | 1   | .....L.....PH.....G.....S....PC.....                         | 60  |
|         |     |                                                              |     |
| Cow     | 61  | LARPDPRAPTTSPLSVSAGAHGDLWNVPSRPPAQALPGACPPTWLPCLSAGLHQPRPQP  | 120 |
| Giraffe | 61  | .....Y.....R.....PRA.....R.C...                              | 120 |
| Okapi   | 61  | .....Y.....W.....PRA....R....C...                            | 120 |
|         |     |                                                              |     |
| Cow     | 121 | PALRPLASHFCGLQGLSVTGLELVHCLGLWDPRDWAQAQDLQDTERSFKRIRTMFNLEQL | 180 |
| Giraffe | 121 | .....Q.....G....Q.....                                       | 180 |
| Okapi   | 121 | .....Q.....Q.....                                            | 180 |
|         |     |                                                              |     |
| Cow     | 181 | EELKVFQKQHNIVGKKRAQLAAQLNLTENQVRVWFQNRVVKYQKQRLKLPASAMAAS    | 240 |
| Giraffe | 181 | .....Q.....H.....V...                                        | 240 |
| Okapi   | 181 | .....Q.....V...                                              | 240 |
|         |     |                                                              |     |
| Cow     | 241 | PDEPSSSDTSIQREDAESGMS                                        | 263 |
| Giraffe | 241 | .....S.....                                                  | 263 |
| Okapi   | 241 | .....                                                        | 263 |

**Newick Tree of Mammalian NOTO**

(bushbaby:0.0742945, (((gorilla:0.00358939, human:0.00441074):0.00992558, orangutan:0.0225977):0.0265145, rhesus:0.034061):0.131246, ((aardvark:0.126819, elephant:0.130966):0.0388679, ((rhino:0.0780812, walrus:0.133037):0.00592613, ((sperm\_whale:0.0459875, (dolphin:0.00480401, orca:0.00645338):0.017312, baiji\_dolphin:0.0170391):0.0132068):0.0420243, (pig:0.128882, ((cow:0.0040265, waterbuf:0.0151691):0.0204709, tibetan\_antelope:0.0470651):0.00501175, (giraffe:0.0284239, okapi:0.0143141):0.0299388):0.114692):0.0028508):0.0554365):0.0229346):0.04806):0.0742945);

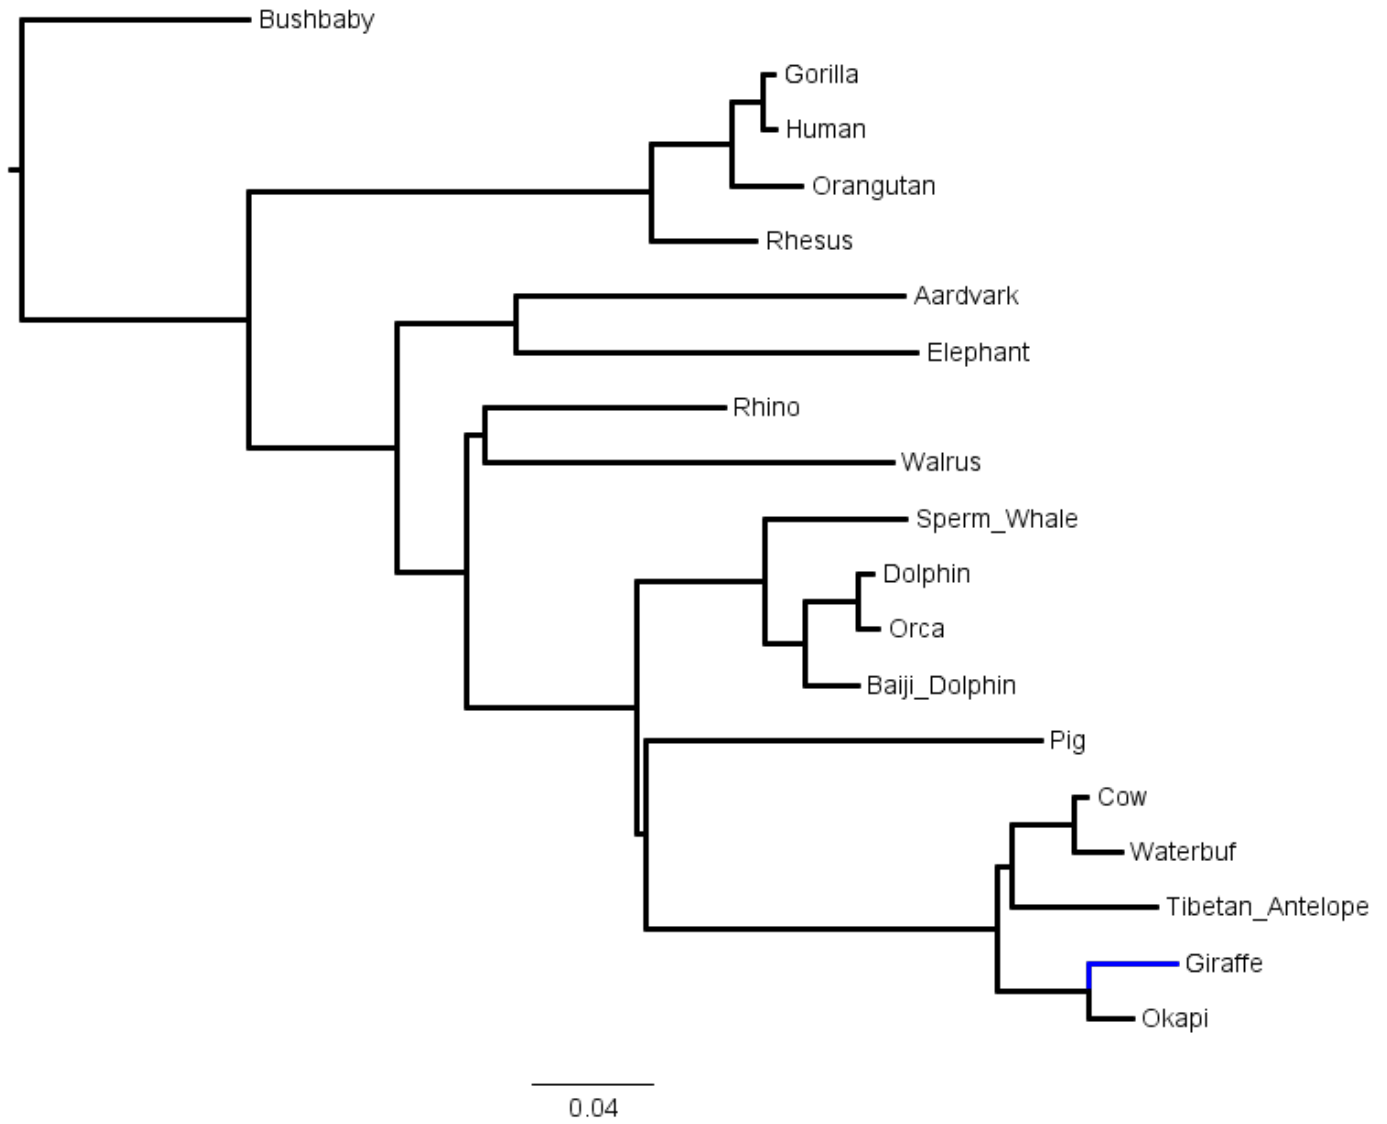

**Locus Name: Homeobox protein notochord (NOTO)**

**Locus Name: Jagged 1 homolog to Drosophila Serrate (JAG1)**

ENSBTAT0000009631 JAG1-201 Notch ligand vertebrae development, cardiovascular, eye, kidney human: Alagille syndrome defects in heart and vertebrae abnormalities. mouse: right ventricular hypertrophy, overriding aorta, ventricular septal defects, coronary vessel abnormalities and valve defects

PP2: L134F

Giraffe: S916T UIS, S939P UIS

Giraffe/Okapi: V45P UPS, D72N UIS, L135F UIS, K854T UPS, SE909-910NQ UIS, K944R UIS, E995K UIS, A1015T UIS

**Protein sequence Alignment of Cow, Giraffe and Okapi JAG1**

|         |     |                                                               |     |
|---------|-----|---------------------------------------------------------------|-----|
| Cow     | 1   | MRSRTRGRPGRPLSLLLALLCALRAKVCASGQFELEILSMENVNGELQNGNCCGGSRN    | 60  |
| Giraffe | 1   | .....P.....                                                   | 60  |
| Okapi   | 1   | .....P.....                                                   | 60  |
| Cow     | 61  | PGDRKCSRDECDTYFKVCLKEYQSRVTAGGPCSFGSGSTPVIGNTFDLKASRGNERNRI   | 120 |
| Giraffe | 61  | .....N.....L.....DG....                                       | 120 |
| Okapi   | 61  | .....N.....L.....DG....                                       | 120 |
| Cow     | 121 | VLPFSFAWPRSYYTLLEAWDSSNDTVQPDSIIIEKASYSGMINPGRQWQTLKQNTGVAHFE | 180 |
| Giraffe | 121 | .....F.....L..R.....A.....                                    | 180 |
| Okapi   | 121 | .....F.....L..R.....A.....                                    | 180 |
| Cow     | 181 | YQIRVTCDDYYYGFGCNKFCRPRDDFFGHYACDQNGNKTCMEGWMGPECNKAICRQGCSP  | 240 |
| Giraffe | 181 | .....                                                         | 240 |
| Okapi   | 181 | .....                                                         | 240 |
| Cow     | 241 | KHGSKLPGDCRCQYGWQGLYCDKCIHPGCVHGTCEPWCCLCETNWWGGQLCDKDLNYC    | 300 |
| Giraffe | 241 | .....                                                         | 300 |
| Okapi   | 241 | .....                                                         | 300 |
| Cow     | 301 | GTHQPCLNGGTCSENTGPKYQCSCPEGYSGPNCEIAEHACLSDPCHNRGCKETSLGFEC   | 360 |
| Giraffe | 301 | .....                                                         | 360 |
| Okapi   | 301 | .....                                                         | 360 |
| Cow     | 361 | ECSPGWTGPTCSTNIDDCSPNNCAHGGTCQDLVNGFQCVCPPQWTGKTCQLDANECEAKP  | 420 |
| Giraffe | 361 | .....S.....K.....                                             | 420 |
| Okapi   | 361 | .....S.....K.....                                             | 420 |
| Cow     | 421 | CVNARCKNLIASYYCNCLPGWMQNCNDININDCVGQCQNDASCRDLVNGYRCICPPGYA   | 480 |
| Giraffe | 421 | .....G...D.....Q.....                                         | 480 |
| Okapi   | 421 | .....G...D.....Q.....                                         | 480 |
| Cow     | 481 | GDHCETDIDECASNPCLNGGHCQNEINRFQCLCPTGFSGNLCQLDIDYCEPNPCQNGAQC  | 540 |
| Giraffe | 481 | .....                                                         | 540 |
| Okapi   | 481 | .....                                                         | 540 |
| Cow     | 541 | YNRASDYFCKCPEDYEGKNCSHLKDHCRTTPCEVIDSCTVAMASNDTPEGVRYISSNVCG  | 600 |
| Giraffe | 541 | .....                                                         | 600 |
| Okapi   | 541 | .....                                                         | 600 |
| Cow     | 601 | PHGKCKSQSGGKFTCDCKNGFTGTYPHENINDCESNPCRNGGTCIDGVNSYACICSGGWE  | 660 |
| Giraffe | 601 | .....I.....                                                   | 660 |
| Okapi   | 601 | .....                                                         | 660 |
| Cow     | 661 | GAHCETNINDCSQNPCHNGGSCRDLVNDFYCDCKNGWKGTCHSRDSQCDEATCNGGTC    | 720 |
| Giraffe | 661 | .....A.....                                                   | 720 |
| Okapi   | 661 | .....A.....                                                   | 720 |
| Cow     | 721 | YDEGDAFKCMCPGGWEGTTCNIARNSSCLPSPCHNGGTCVVNGESFTCVCKEGWEGPICT  | 780 |
| Giraffe | 721 | .....                                                         | 780 |
| Okapi   | 721 | .....                                                         | 780 |
| Cow     | 781 | QNTNDCSPHPCYNSGTCVDGENWYRCECAPGFAGPDCRININECQSSPCAFCATCVDEIN  | 840 |
| Giraffe | 781 | .....                                                         | 840 |
| Okapi   | 781 | .....                                                         | 840 |

|         |      |                                                               |      |
|---------|------|---------------------------------------------------------------|------|
| Cow     | 841  | GYRCICPPGHSGAKCQEVSGRSCVTMGSVIPDGAKWDADCNACQCLDGRVACSKVWCGPR  | 900  |
| Giraffe | 841  | .....T.....I..M.....D.....                                    | 900  |
| Okapi   | 841  | .....T.....I..M.....D.....                                    | 900  |
| Cow     | 901  | PCSLHRGHSECPGQSCVPILDTQCFVVRPCTGVGECRSSLQPVKTKCASDPYYQDNCAN   | 960  |
| Giraffe | 901  | .....K..NQ.....T.....P.....R...V.....                         | 960  |
| Okapi   | 901  | .....K..NQ.....R...V.....                                     | 960  |
| Cow     | 961  | ITFTFNKEMMSPGLTTEHICSELRLNLILKNVSAEYSIYIACEPSPSANNEIHVAISAED  | 1020 |
| Giraffe | 961  | .....K.....T.....                                             | 1020 |
| Okapi   | 961  | .....K.....T.....                                             | 1020 |
| Cow     | 1021 | IRDDGNPIKEITDKIINLVSKRDGNSSLIAAAVAEVRVQRRLPKSRTDFLVPLLSSVLTVA | 1080 |
| Giraffe | 1021 | .....R..D.....N.....                                          | 1080 |
| Okapi   | 1021 | .....R..D.....N.....                                          | 1080 |
| Cow     | 1081 | WVCCLVTAFYWCVRKRRKPGSHARAASEDNTTNNVREQLNQIKNPIEKHGANTVPVKDYE  | 1140 |
| Giraffe | 1081 | .....I.....                                                   | 1140 |
| Okapi   | 1081 | .....I.....                                                   | 1140 |
| Cow     | 1141 | SKNSKMSKIRTHNSEVEEDMDKHQQKARFAKQATYTLVDREEKPAHGTPAKHPNWTNKQ   | 1200 |
| Giraffe | 1141 | .....P.....                                                   | 1200 |
| Okapi   | 1141 | .....P.....                                                   | 1200 |
| Cow     | 1201 | DNRDLESAQSLNRMEYIV                                            | 1219 |
| Giraffe | 1201 | .....                                                         | 1219 |
| Okapi   | 1201 | .....                                                         | 1219 |

#### Newick Tree of Mammalian JAG1

```
(mouse:0.0130438, (bushbaby:0.0184162, ((orangutan:0, human:0.000829258):0.00576013,
rabbit:0.00830182):0.00113569, (aardvark:0.0179997, (rhino:0.0102121, ((cat:0.00525205,
(dog:0.00933142, (walrus:0.001755, weddel_seal:0.00235855):0.00642237):0.00031529):0.00507031,
(pig:0.0115497, ((minke_whale:0.00153792, baiji_dolphin:0.00175157):0.000250757,
(dolphin:0.000460762, orca:0.000360593):0.000571613):0.00560691, (((cow:0.000187183,
yak:0):0.000337076, water_buffalo:0.0025458):0.00437421, tibetan_antelope:0.00964462):0.00306327,
(giraffe:0.00240867, okapi:5.54004e-
05):0.0176221):0.0139723):0.00256881):0.00711842):0.000895776):0.00203781):0.00127203):0.00045141
4):0.0130438);
```

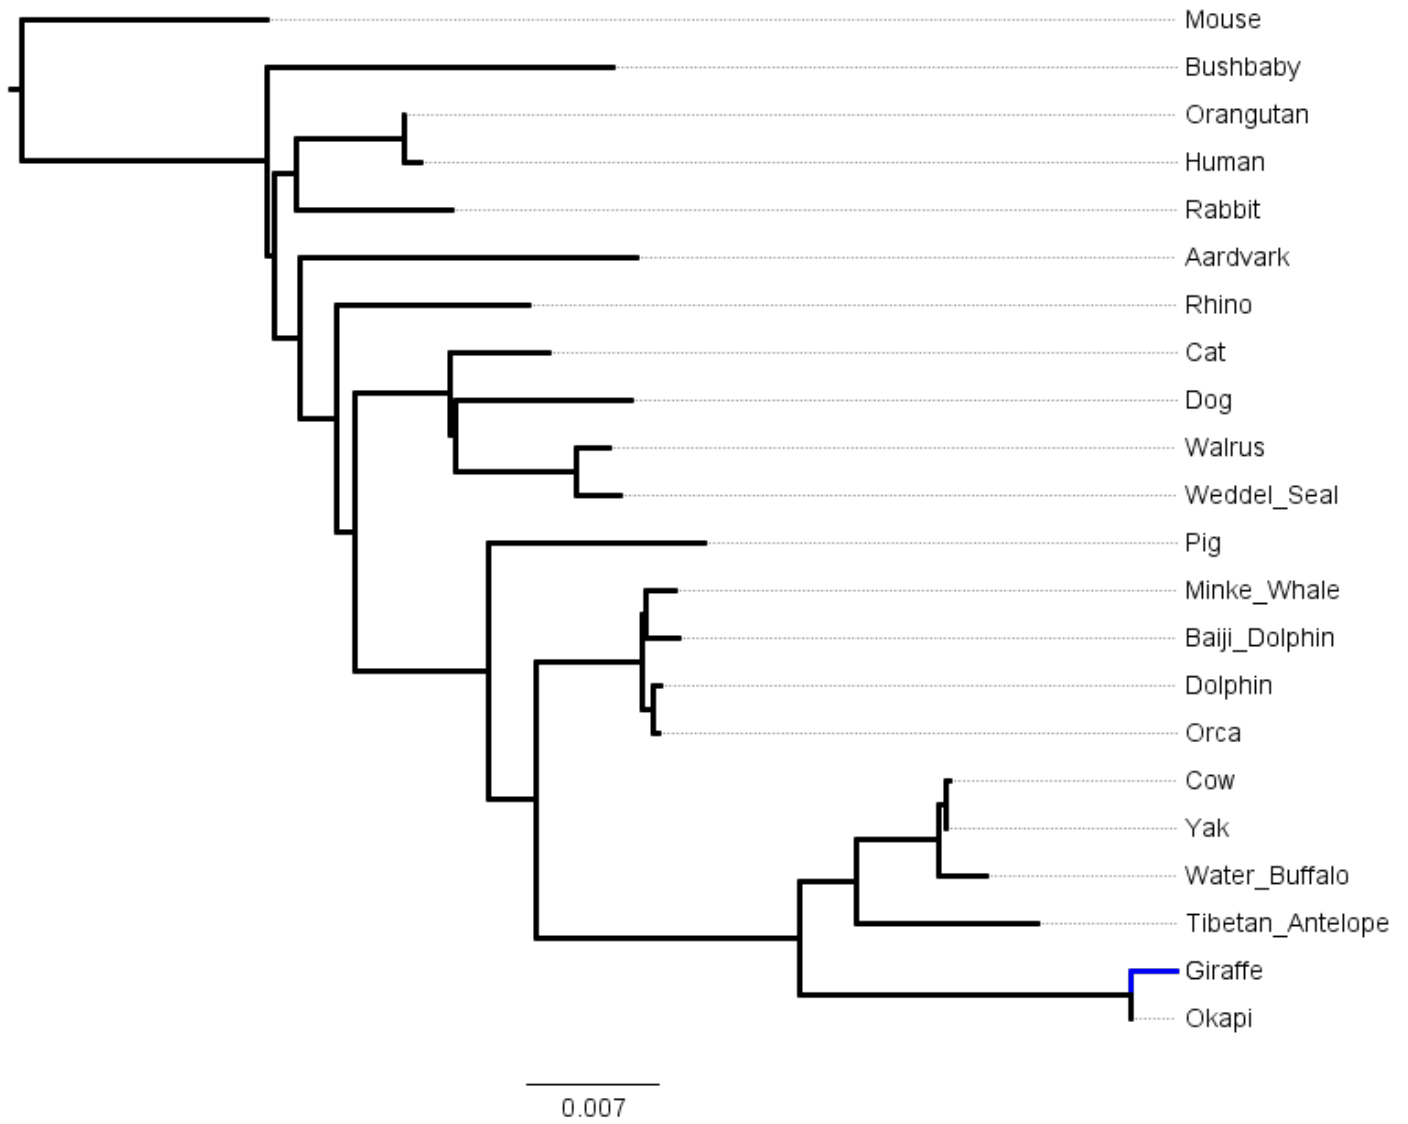

**Locus Name: Jagged 1 homolog to Drosophila Serrate (JAG1)**

**Locus Name: delta-like three (DLL3)**

ENSBTAT00000013852      DLL3-201 Notch ligand      embryonic somitogenesis  
mouse: disruption of somite boundaries, shortened trunk, vertebrae  
malformed

PP2: (Giraffe/Okapi) L103M, R261G, P342L; (Okapi) G132D, G148C

Giraffe: L10F UPS, G195A UPS, P197S UPS, L258F UIS, A475T UPS  
Giraffe/Okapi: P7L UPS, E71D UIS, V89A UPS, L103M UIS, S254R UPS, R261G UIS, P526R UPS, R585P  
Okapi: S69P UIS, G132D UPS, L143V UIS, G148C UIS

**Protein sequence Alignment of Cow, Giraffe and Okapi DLL3**

|         |     |                                                                 |     |                  |
|---------|-----|-----------------------------------------------------------------|-----|------------------|
| Cow     | 1   | MVAPQMPQLLSSTVILALFFLPQAQFAGVFELQIHSFGPGPGTFRSPCKAGGSCRLFF      | 60  |                  |
| Giraffe | 1   | .....L..F.....A.....S.....                                      | 60  |                  |
| Okapi   | 1   | .....L.....L.....A.....S.....                                   | 60  |                  |
|         |     |                                                                 |     |                  |
| Cow     | 61  | RVCLKPGLSEETAETAEAPCTLGAALSARGPVYTAQPGALAPELRLPDGLLRVPFRDAWPGTF | 120 |                  |
| Giraffe | 61  | .....D.....A.....P.....M.....T.....                             | 120 |                  |
| Okapi   | 61  | .....P.D.....A.....VP.....M.....                                | 120 |                  |
|         |     |                                                                 |     |                  |
| Cow     | 121 | SLIIETWREELGGQIGGAAWSLLARVAGRLLAAGGPWTRDVQRAGAWELRFSYRARCEP     | 180 | DSL domain       |
| Giraffe | 121 | .....P.....R.....                                               | 180 |                  |
| Okapi   | 121 | .....D.....P.....V..M.C..R.....T.....                           | 180 |                  |
|         |     |                                                                 |     |                  |
| Cow     | 181 | PAVGAACARLCRSRGAPLRCDPELRPCAPVEEECEAPPVCRAGCSPEHGFCEQPDECRL     | 240 |                  |
| Giraffe | 181 | .....A.S.....T..D...L.....                                      | 240 |                  |
| Okapi   | 181 | .....T...D...L.....                                             | 240 |                  |
|         |     |                                                                 |     |                  |
| Cow     | 241 | EGWTGPLCTIPVSSSSCLSSRGPSATTGCLVPGPGPCDGNPCANGGSCSETLGSFECTC     | 300 | 6 EGF repeats    |
| Giraffe | 241 | .....R..F..G.....                                               | 300 | between DSL & TM |
| Okapi   | 241 | .....R.....G.....                                               | 300 |                  |
|         |     |                                                                 |     |                  |
| Cow     | 301 | PRGFYGLRCEVSGVTCADGPCFNGGLCVGGADPDSAYICHCPPGFQGSNCEKRVDRCSLQ    | 360 |                  |
| Giraffe | 301 | .....T.....L.....                                               | 360 |                  |
| Okapi   | 301 | .....T.....L.....K                                              | 360 |                  |
|         |     |                                                                 |     |                  |
| Cow     | 361 | PCRNGGLCLDLGHALRCRCRAGFAGPRCEHDLEDCTGHTCANGGTCLEGGGARRCSCALG    | 420 |                  |
| Giraffe | 361 | .....                                                           | 420 |                  |
| Okapi   | 361 | .....                                                           | 420 |                  |
|         |     |                                                                 |     |                  |
| Cow     | 421 | FGGRDCRERADPCAARPCAAGGRCYAHFSGLVACAPGYMGARCEFPVHPDGAGALPAAQ     | 480 |                  |
| Giraffe | 421 | .....T.....                                                     | 480 |                  |
| Okapi   | 421 | .....                                                           | 480 |                  |
|         |     |                                                                 |     |                  |
| Cow     | 481 | PGLREGDPQRFLPPALGLLVAAGLAGAALLLVHVRRRGSPSRDTGPRLLAGTPEPSVHAL    | 540 | TM domain        |
| Giraffe | 481 | ...Q.....S.R.....                                               | 540 |                  |
| Okapi   | 481 | ...Q.....S.R.....                                               | 540 |                  |
|         |     |                                                                 |     |                  |
| Cow     | 541 | PDALNNMRTQEGPGDGFSPSSDWNHPEDGDARSIIYVISAPSVYAREA                | 587 |                  |
| Giraffe | 541 | .....R.....L.....I..P..                                         | 587 |                  |
| Okapi   | 541 | .....R.....I..P..                                               | 587 |                  |

**Newick Tree of Mammalian DLL3**

(guinea\_pig:0.0460113, ((mouse:0.0238228, rat:0.0323618):0.0883706, ((manatee:0.0439186, aardvark:0.070948):0.0408664, ((human:0.0140158, rhesus:0.0278144):0.0428855, ((polecat:0.0399908, cat:0.0230087):0.0219097, (pig:0.0366227, (orca:0.0377216, ((cow:0.00797501, sheep:0.0109108):0.00810372, (giraffe:0.0116582, okapi:0.0159333):0.0219494):0.0343832):0.00320336):0.012967):0.00504953):0.0067664):0.00721435):0.0460113);



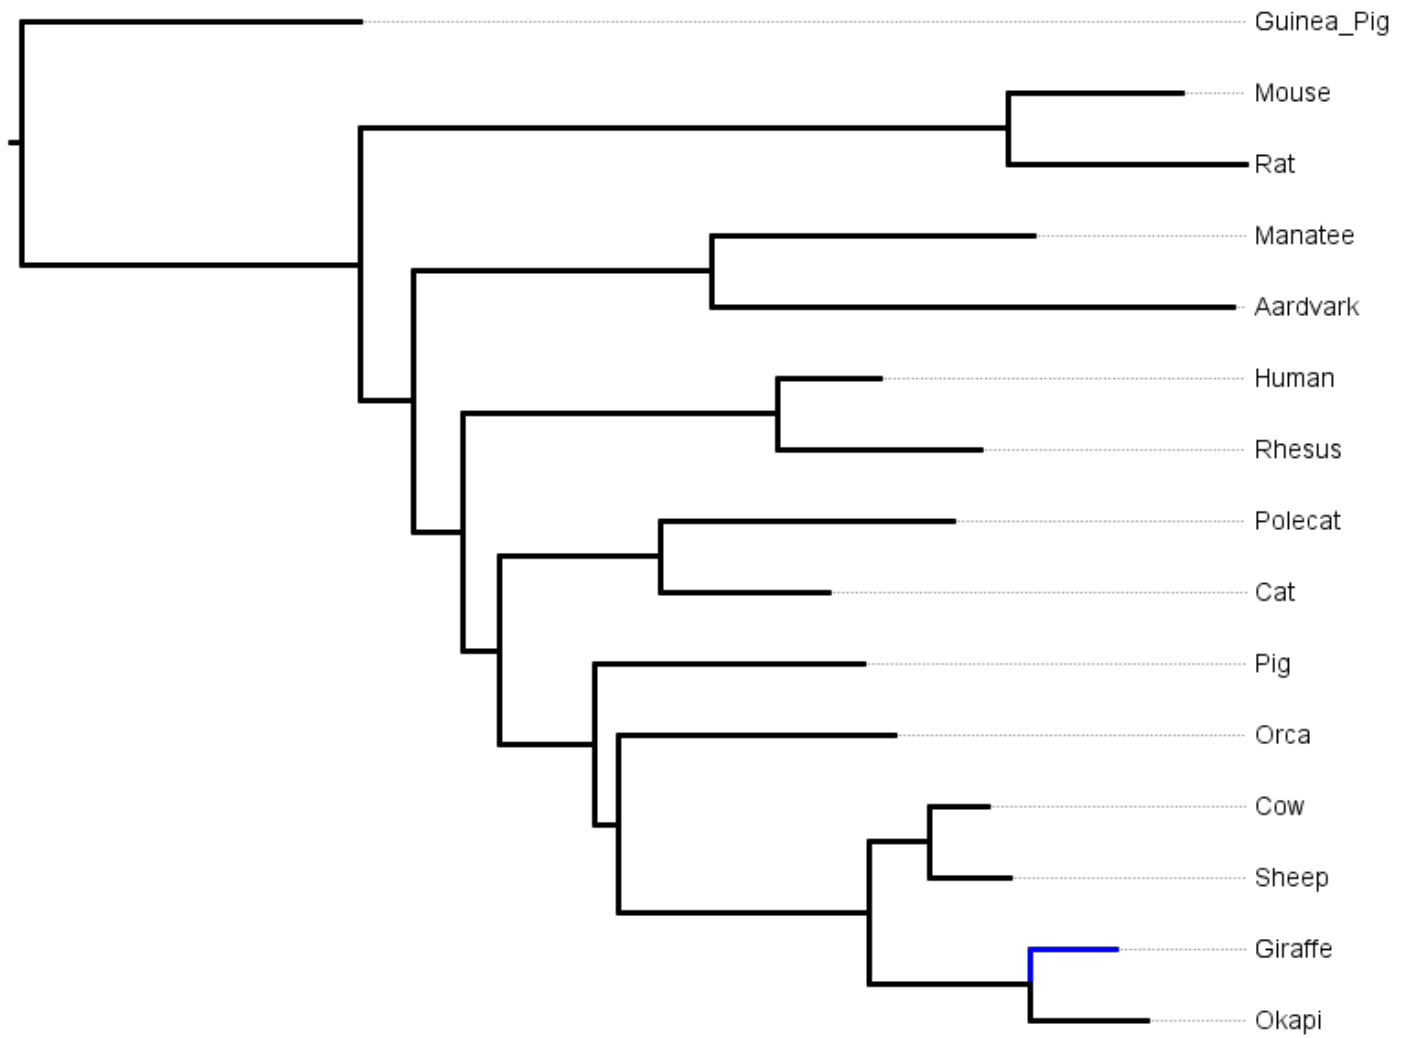

0.02

Locus Name: **delta-like three (DLL3)**

**Locus Name: Neurogenic Locus Notch Homolog Protein 4 (Notch4)**

ENSBTAT0000050083 NOTCH4-201 notch pathwaymesoderm development, angiogenesis, neurogenesis  
 mouse: Homozygotes for null alleles exhibit no obvious phenotypic defects. However, in  
 conjunction with Notch1 deficiency, embryonic, vascular, and nervous system defects are observed.

PP2 (Giraffe) D650N, Q750H, V1714I; (Giraffe/Okapi) G1893E; (Okapi) Q638M, A846T

**Protein sequence Alignment of Cow, Giraffe and Okapi**

|         |     |                                                                  |     |
|---------|-----|------------------------------------------------------------------|-----|
| Cow     | 1   | MQPPSLLLPLLLLLCQPVVTRTRGLQCGSFPEPCANGGTCLSLSQGQGTCCAPGFLGETC     | 60  |
| Giraffe | 1   | .....P.....R.....H.....                                          | 60  |
| Okapi   | 1   | .....P.....R.....H.....                                          | 60  |
| Cow     | 61  | QFPDPCQDAQPCQNGGSCHTFLPTLPGSPGTPSPMAPSFFCTCPSGFTGDRCQAQIRDPC     | 120 |
| Giraffe | 61  | .....S..SA.....K...                                              | 120 |
| Okapi   | 61  | .....S..S.....K...                                               | 120 |
| Cow     | 121 | SSFCSKMGRCHLQDSGRPRCSCMPGWTGEHCQLRDFCSANPCVNGGVCLATYPQIQCRCP     | 180 |
| Giraffe | 121 | .....A.....Q.....                                                | 180 |
| Okapi   | 121 | .....A.....Q.....                                                | 180 |
| Cow     | 181 | PGFEGHACEHDVNECYLDPGPCPKGTTCHNTLGSCQCLCPAGREGPRCGLRPGPCTPRGC     | 240 |
| Giraffe | 181 | .....F.....S.....L.....M..                                       | 240 |
| Okapi   | 181 | .....F.....D.....                                                | 240 |
| Cow     | 241 | LNGGTCQLVPGRDSTFHLCLCPPGFTGPSCEVNPDDCAGHCQNGGTCQDGLGTYTCLCP      | 300 |
| Giraffe | 241 | .....V.....                                                      | 300 |
| Okapi   | 241 | .....V.....                                                      | 300 |
| Cow     | 301 | EAWTGWDCSEDVDECEVQGPPCRNGGTCQNSAGDFYCVCSVSGWGAGCEENLDDCVAAT      | 360 |
| Giraffe | 301 | .....H.....                                                      | 360 |
| Okapi   | 301 | .....H.....                                                      | 360 |
| Cow     | 361 | CAPGSTCIDRVGSFSLCLPPGRTGLLCHMEDMCLSQPCHEEAQCSTNPLSGSTLCVCQPG     | 420 |
| Giraffe | 361 | .....                                                            | 420 |
| Okapi   | 361 | .....                                                            | 420 |
| Cow     | 421 | YTGP TCHQDLDECQMAQQGPPSPCEHGGSCLNTPGSFECLCPPGYTGSRCEADHNECLSQP   | 480 |
| Giraffe | 421 | .....                                                            | 480 |
| Okapi   | 421 | .....                                                            | 480 |
| Cow     | 481 | CHRG TCDLLLATFQCLCPPLEGQLCEVEIDE CASAPCLNQADCHDLLNGFQCICQPGF     | 540 |
| Giraffe | 481 | .Q.....R.....N...S..R.V.R...                                     | 540 |
| Okapi   | 481 | .Q.....N.....R.V.R...                                            | 540 |
| Cow     | 541 | TGPRCEEDINECQSSPCANGGECQDQPGSFHCKCPPGFEGPRCQE EVDECLSGPCPTGAS    | 600 |
| Giraffe | 541 | .....Q.....                                                      | 600 |
| Okapi   | 541 | ..S..Q.....Q.....                                                | 600 |
| Cow     | 601 | CLDLPGAFLCVCPSGFTGHLCEIPLCAPNLCQPKQKQDQEDNAHCLCPDGNPGCVPTED      | 660 |
| Giraffe | 601 | .....Q.....P...R...SN.....                                       | 660 |
| Okapi   | 601 | .....I...D...Q.....M...R.....                                    | 660 |
| Cow     | 661 | NCTCHHGHCQRSSCVCDGGWTGPECDDTLGGCVSTPCA HGGTCHPQPFYGNCTCPTGYTG    | 720 |
| Giraffe | 661 | .....E.....                                                      | 720 |
| Okapi   | 661 | .....                                                            | 720 |
| Cow     | 721 | PTCSEEV TACHSGPCLNGGSCSPSPGGYTCTCPLSHTGLRCQTSIDHCASALCLNGGTCV    | 780 |
| Giraffe | 721 | .....S.A.....P.....                                              | 780 |
| Okapi   | 721 | .....S.A.....P.....                                              | 780 |
| Cow     | 781 | NKPGTF SCLCTPGFQGP RCEGRTRPSCADSPCRNMATCQDSPQGP RCLCPPGYTG GSCQT | 840 |
| Giraffe | 781 | .R...S...A..H.....K.....                                         | 840 |
| Okapi   | 781 | .R...S...A.....K.....                                            | 840 |

|         |      |                                                                |      |
|---------|------|----------------------------------------------------------------|------|
| Cow     | 841  | LMDLCAQKPCPQNSHCLQTGPSFQCLCLQGWTFPLCNLPLSSCQKVALSQGTEVSSLCQN   | 900  |
| Giraffe | 841  | .....                                                          | 900  |
| Okapi   | 841  | .V...T.....                                                    | 900  |
| Cow     | 901  | GGVCIDSGPSHFCHCPPGFQGSICQDQVNPCESTRPCQHGATCVAQPNGYLCQCAPGYSGQ  | 960  |
| Giraffe | 901  | .....T.....                                                    | 960  |
| Okapi   | 901  | .....T.....R.....                                              | 960  |
| Cow     | 961  | NCSEEPDACQSQPCHNQGTICISKPGGFHCACPPGFVGLRCEGDVDECLDRPCHPTGTAAAC | 1020 |
| Giraffe | 961  | .....L.....TP.....Y.....A.....                                 | 1020 |
| Okapi   | 961  | .....L.....TP.....A.....                                       | 1020 |
| Cow     | 1021 | HSLANAFYCQCLPGHTGQWCEVELDPCQSQPCAHSQSCEATAGPPPGFTCHCPQGFEGPT   | 1080 |
| Giraffe | 1021 | .....G.....                                                    | 1080 |
| Okapi   | 1021 | .....G.....                                                    | 1080 |
| Cow     | 1081 | CSHRAPSCGLHHCHHGGLCLPSPKPLPPRCACLNGYGGPDCLTPPAPSGCGPPSPCLHN    | 1140 |
| Giraffe | 1081 | .....P.....                                                    | 1140 |
| Okapi   | 1081 | .....                                                          | 1140 |
| Cow     | 1141 | GSCSETPGLGGPGFRCSPPASSPGPRCQRPVKGCEGRSGDGACDAGCSGPGGNWDGGDC    | 1200 |
| Giraffe | 1141 | .....I.....D.....                                              | 1200 |
| Okapi   | 1141 | .....                                                          | 1200 |
| Cow     | 1201 | SLGVDPDPWKGCPSPHSRCWLLFRDQCHPQCDSEECFLFDGYDCETPPACIPAYDQYCRDHF | 1260 |
| Giraffe | 1201 | .....Q.....T.....H...                                          | 1260 |
| Okapi   | 1201 | .....T.....                                                    | 1260 |
| Cow     | 1261 | HNGHCEKGCNTAECGWDDGDCRPELDGNSEWGPSLALLVVLSPSTLDQQLLALARVLSLTL  | 1320 |
| Giraffe | 1261 | .....I.....F.....A.....                                        | 1320 |
| Okapi   | 1261 | .....                                                          | 1320 |
| Cow     | 1321 | RVGLWVRKDSEKDMVYPYPGAQAEELGGTPDPSQQERAAQTEPTGKETDLSLSTGFVV     | 1380 |
| Giraffe | 1321 | .....R.....Q.....                                              | 1380 |
| Okapi   | 1321 | .....R.....Q.....N.....                                        | 1380 |
| Cow     | 1381 | VMGVDSLHCGPERPASRCPWDPGLLLRFLAAMAAGALEPLLPGLLAAHPRAGTKPSAN     | 1440 |
| Giraffe | 1381 | .....R.....H.....E.....                                        | 1440 |
| Okapi   | 1381 | .....R.....H.....E.....                                        | 1440 |
| Cow     | 1441 | QLPWPVLCSPVVGVLALLGALLVQLIRRRRREHGALWLPFGFTRRPRTQPVSRRRRPP     | 1500 |
| Giraffe | 1441 | .....                                                          | 1500 |
| Okapi   | 1441 | .....                                                          | 1500 |
| Cow     | 1501 | LGEDSIGLKALKAEADMDEDGVVMCSVPKEGEEVQAEEMASPPKCQLWSLSSDCQELPQ    | 1560 |
| Giraffe | 1501 | .....E.....Q.....V.....                                        | 1560 |
| Okapi   | 1501 | .....E.....H.....                                              | 1560 |
| Cow     | 1561 | AAMLTPPDSEMDVPDVTQGPDPVPLMSAVCCGGVESRTYQETWLGSPWPWEPLLEGG      | 1620 |
| Giraffe | 1561 | .....D..                                                       | 1620 |
| Okapi   | 1561 | .....D..                                                       | 1620 |
| Cow     | 1621 | ACPQVHTVGTGETPLHLAARFSRPTAARRLLEAGANPNQPDRAGRTPHHTAADAAREVC    | 1680 |
| Giraffe | 1621 | .....                                                          | 1680 |
| Okapi   | 1621 | .....                                                          | 1680 |
| Cow     | 1681 | QLLLRSRQTAVDARTEDGTTALMLAARLAVEDLVEELIAAQADVGARDKWGKTALHWAAA   | 1740 |
| Giraffe | 1681 | .....I.....                                                    | 1740 |
| Okapi   | 1681 | .....                                                          | 1740 |
| Cow     | 1741 | VNNARAARSLAQAGADKDAQDGREQTPLFLAAREGAMEVAQLLLGLGAAQGLRDQAGLTP   | 1800 |
| Giraffe | 1741 | .....R.....                                                    | 1800 |
| Okapi   | 1741 | .....R.....                                                    | 1800 |
| Cow     | 1801 | GDVARQRNHWDLLTLLEGAGPPEARHKPTPGRGAGTFQARARTASGSVPPRGGGAVPRCRT  | 1860 |
| Giraffe | 1801 | .....P.....                                                    | 1860 |
| Okapi   | 1801 | .....T.....A.....                                              | 1860 |

|         |      |                                                               |      |
|---------|------|---------------------------------------------------------------|------|
| Cow     | 1861 | LSAGARPQARTLSVDLAAHGGGAYSHCRSLSKGTGEGPPLRGRRFSAAGMRGPRPNPAMVR | 1920 |
| Giraffe | 1861 | .....S.....E.....A.....                                       | 1920 |
| Okapi   | 1861 | .....S.....E.....V..                                          | 1920 |
|         |      |                                                               |      |
| Cow     | 1921 | GRPGVSAGSGGVAATVDWPCDWVPLGACGPASNTPIPPPCLTPSPERGSPQVAWGPPAHQ  | 1980 |
| Giraffe | 1921 | ..S..A.....A.....A.....                                       | 1980 |
| Okapi   | 1921 | ..S..A.....A.....A.....                                       | 1980 |
|         |      |                                                               |      |
| Cow     | 1981 | VIPLNAGGEGQK                                                  | 1992 |
| Giraffe | 1981 | .....                                                         | 1992 |
| Okapi   | 1981 | .....                                                         | 1992 |

**Newick Tree of Mammalian NOTCH4**

```
(manatee:0.0382014, (((human:0.00838792, orangutan:0.00875044):0.00688613,
baboon:0.0288976):0.040128, bushbaby:0.0643707):0.00864676, ((panda:0.0217116,
walrus:0.023918):0.0351746, ((rhino:0.0295228, horse:0.03205):0.00969203, (pig:0.0403091,
((spermwhale:0.00902558, (dolphinfw:0.00705352, orca:0.012218):0.00243441):0.00220093,
minkewhale:0.0105096):0.0180912, ((tibetantlp:0.00485875, sheep:0.00630344):0.0064468,
(cow:0.00781667, waterbuffalo:0.00837873):0.00808722):0.00212078, (giraffe:0.012021,
okapi:0.00621759):0.00658709):0.0291063):0.00746966):0.0116224):0.00173587):0.0127588):0.0382014;
```

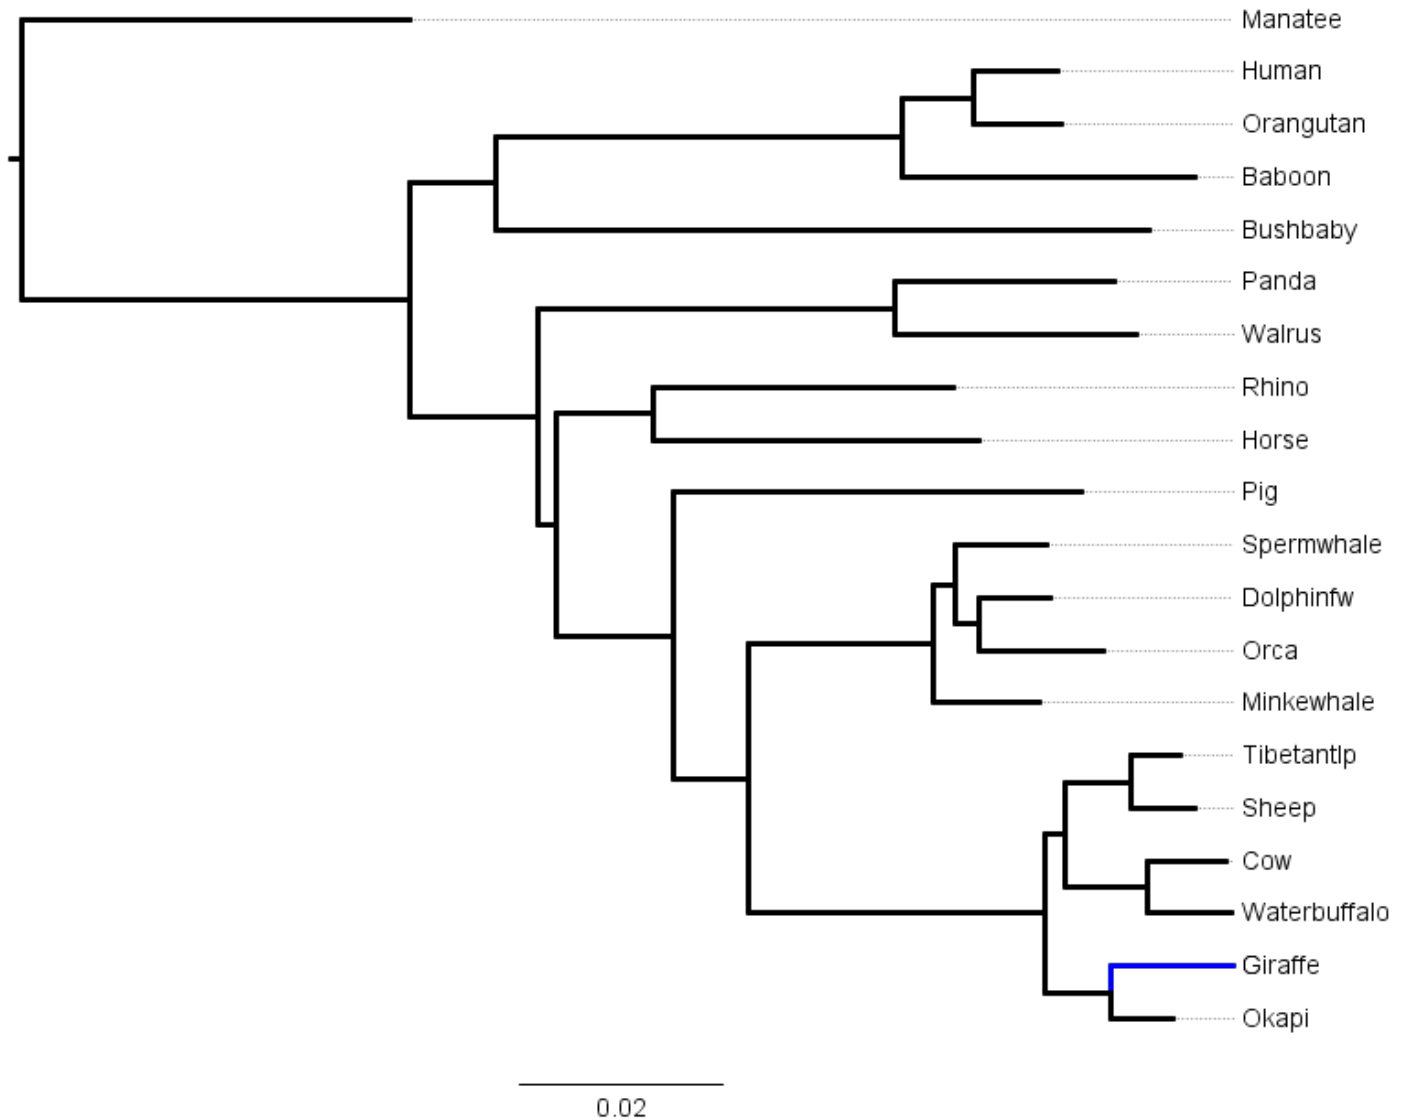

**Locus Name: Neurogenic Locus Notch Homolog Protein 4 (Notch4)**

**Locus Name: Fibroblast growth factor receptor-like 1 (FGFRL1)**

ENSBTAT0000039444 FGFRL1-201 decoy FGF receptor cranofacial, axial & appendicular skeleton, heart, kidney mouse: multiple skeletal defects, delayed mineralization in cervical vertebrae, heart defects human: Wolf-Hirschhorn syndrome

PSG: T250A 0.908, D259G 0.905, F260S 0.910, F266L 0.909, K269R 0.918, K275R 0.908, E285D 0.906  
PP2: (Giraffe) D259G, F260S, K269R, K275R, E285D

Giraffe: T250A UIS, D259G UIS, F260S UIS, F266L UIS, K269R UIS, K275R UIS, E285D UIS  
Giraffe/Okapi: G254S UIS

**Protein sequence Alignment of Cow, Giraffe and Okapi FGFRL1**

|         |     |                                                                     |     |
|---------|-----|---------------------------------------------------------------------|-----|
| Cow     | 1   | MTPSPALVLP LLLLLL GALPPAAAARGP PRMADKV VPRQVARLGR TVRLQCPVEGDP PPLT | 60  |
| Giraffe | 1   | .....                                                               | 60  |
| Okapi   | 1   | .....                                                               | 60  |
|         |     |                                                                     |     |
| Cow     | 61  | MWTKDGR TIHGGWSRFRVLPQGLKVKEVEPEDAGAYVCKATNGFGSLSVNYTLIVMDDTS       | 120 |
| Giraffe | 61  | .....                                                               | 120 |
| Okapi   | 61  | .....                                                               | 120 |
|         |     |                                                                     |     |
| Cow     | 121 | PGRESFGHDSSSGGQEDPASKQWARPRFTQPSKMRRRVIARPVGSSVRLKCVASGHPRPD        | 180 |
| Giraffe | 121 | .....G.....G.....                                                   | 180 |
| Okapi   | 121 | .....G.....                                                         | 180 |
|         |     |                                                                     |     |
| Cow     | 181 | IMWMKDDQALTRPEAGEHRKKKWTLSLKNLRPEDSGKYTCRVSNRAGAINATYKVDVIQR        | 240 |
| Giraffe | 181 | .....                                                               | 240 |
| Okapi   | 181 | .....                                                               | 240 |
|         |     |                                                                     |     |
| Cow     | 241 | TRSKPVL TGTHPVNTTVDFGGTTSFQCKVRSVDKPV IQWLKRVEYGAEGRYNSTIDVGGQ      | 300 |
| Giraffe | 241 | .....A.....GS.....L..R.....R.....D.....                             | 300 |
| Okapi   | 241 | .....                                                               | 300 |
|         |     |                                                                     |     |
| Cow     | 301 | KFVVLPTGDVWSRPDGSYLNKLLITRARQDDAGMYICLGANTMGYSFRSAFLTVLPDPKP        | 360 |
| Giraffe | 301 | .....                                                               | 360 |
| Okapi   | 301 | .....                                                               | 360 |
|         |     |                                                                     |     |
| Cow     | 361 | PGPPVAPSSSTTSLPWPV VIGIPAGAVFIVGT VVLWLCQAKKKPCAPAPPAPHRPPATA       | 420 |
| Giraffe | 361 | .....                                                               | 422 |
| Okapi   | 361 | .....S.....                                                         | 422 |
|         |     |                                                                     |     |
| Cow     | 421 | RDRGGDKDLPAPATVGS GPGVGLCEELGPPAAPQHLLGPGSATGPKLYPKLYTDTHTHH        | 480 |
| Giraffe | 423 | .E.S.....T..PL.....A.....S.....                                     | 482 |
| Okapi   | 423 | .E.....T..PL.....T.....S.....                                       | 482 |
|         |     |                                                                     |     |
| Cow     | 481 | SHTHSHVEGKVHQHQH THYHC                                              | 501 |
| Giraffe | 483 | .....I..Q.                                                          | 503 |
| Okapi   | 483 | .....I..Q.                                                          | 503 |

**Newick Tree of Mammalian FGFRL1**

(rat:0.0365636, (guineapig:0.0405323, ((human:0.00871237, (baboon:0, rhesus:0.00218068):0.00832846):0.025617, bushbaby:0.042395):0.00227335, ((elephant:0.024841, aardvark:0.0239686):0.0233709, ((camel:0.00607814, alpaca:0.00241458):0.0272582, ((rhino:0.0386203, ((polecat:0.0248259, (walrus:0.00855245, weddel\_seal:0.0147311):0.0119796):0.00264384, cat:0.0275929):0.00302873, dog:0.035323):0.0135985):0.00230938, ((orca:0.00669743, baiji\_dolphin:0.00821288):0.00352718, (cow:0.00721142, (giraffe:0.0192411, okapi:0.00419128):0.0111612):0.0139591):0.00336271):0.00286468):0.0106337):0.00882947):0.0104164):0.0365636);

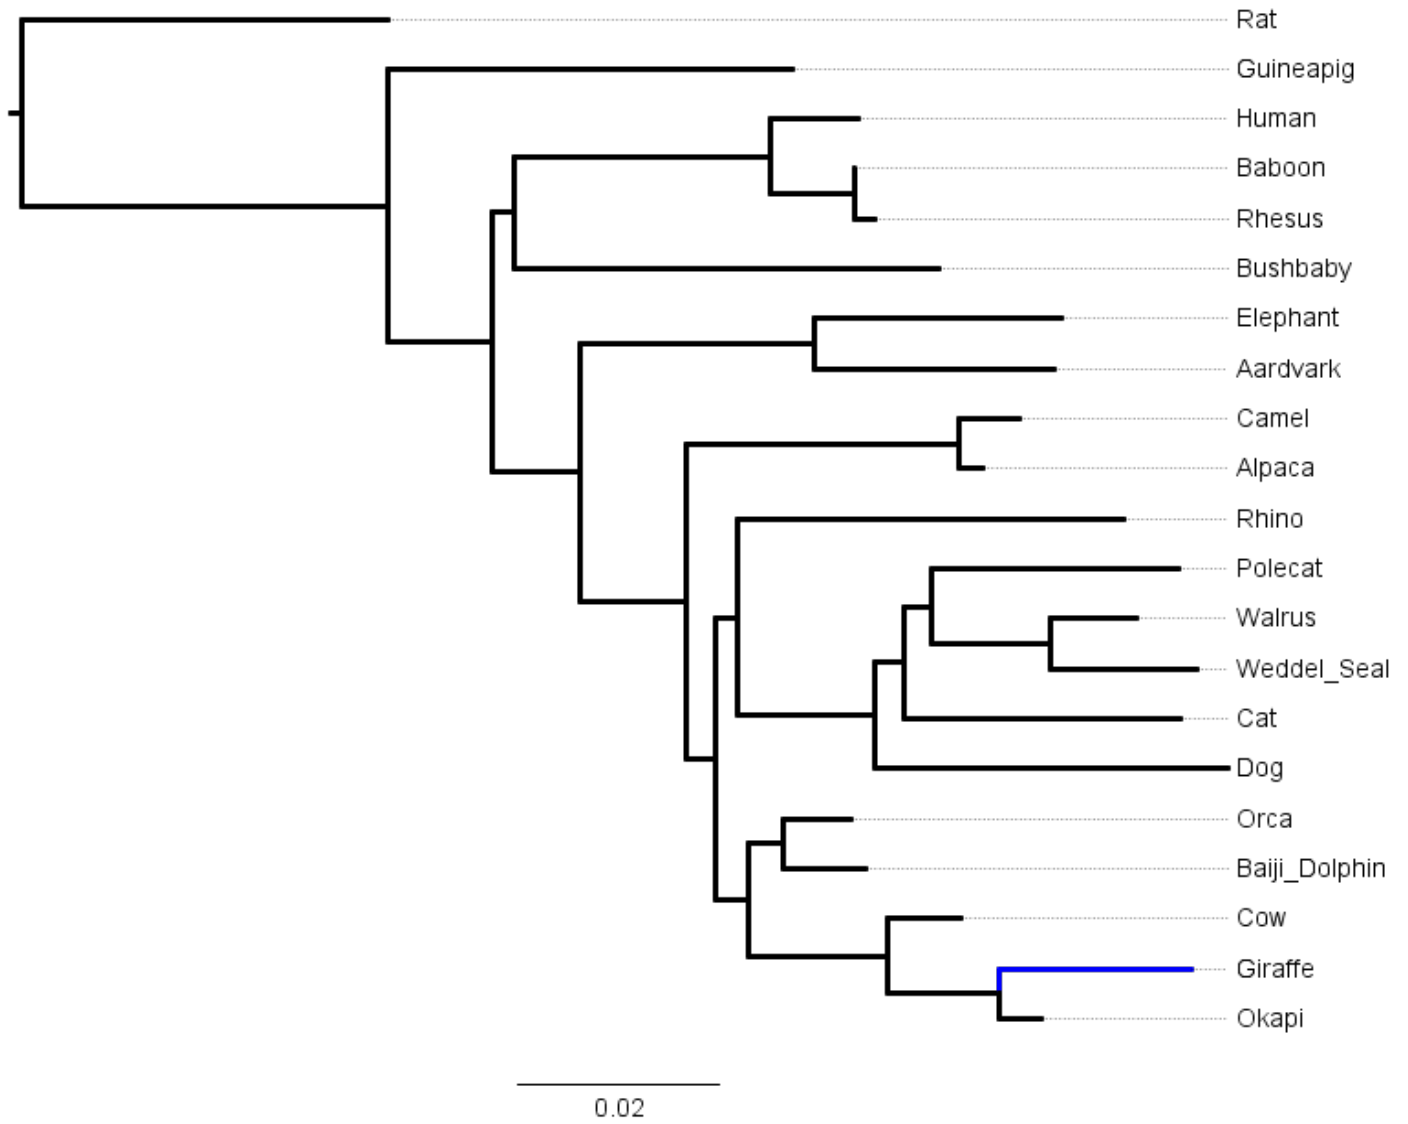

**Locus Name: Fibroblast growth factor receptor-like 1 (FGFRL1)**

**Locus Name: programmed cell death 2-like (PDCD2L)**

ENSBTAT0000003327 PDC2L-201 transcriptional repressor programmed cell death  
no mutants described for mouse or human

PP2: (Giraffe) D128G

Giraffe: K6E UPS, V35D UPS, D128G UIS, A137S UPS, G181R UPS, K248R UIS  
Okapi: T207M UPS, T285I UPS

**Protein sequence Alignment of Cow, Giraffe and Okapi PDCD2L**

|         |     |                                                                 |     |
|---------|-----|-----------------------------------------------------------------|-----|
| Cow     | 1   | MAAVRKPVLLGLRDAAVHGRPTGPSAWTASKLGGVDPDALPAVAAPRPVCELRCRQPLALVV  | 60  |
| Giraffe | 1   | ...A.E.....S.....D.....                                         | 60  |
| Okapi   | 1   | ...A.....                                                       | 60  |
|         |     |                                                                 |     |
| Cow     | 61  | QVYCPLEGS PFHRL LHVFACPRPECGSGGARSWKVFRSQCLQMREKETQDAQKQENGLTA  | 120 |
| Giraffe | 61  | .....                                                           | 120 |
| Okapi   | 61  | .....A.                                                         | 120 |
|         |     |                                                                 |     |
| Cow     | 121 | EDWCEGADDWGS DSEEASPLQPVSEFGNDLSNAKDRDWTSQLQDLRLQDTPVPGVAPPAPP  | 180 |
| Giraffe | 121 | .....G.....S..P..I..D....S.....A.....                           | 180 |
| Okapi   | 121 | .....P..I..D....S.S.....H.....A.....                            | 180 |
|         |     |                                                                 |     |
| Cow     | 181 | GGGPALPPSVPQFLPYIICVVD EDDYTD FDISLDHAQSLLREYQQREGVDMEQLLSQSLSS | 240 |
| Giraffe | 181 | RE.L...A.....S..N.....V.....K.....                              | 240 |
| Okapi   | 181 | .E.L...V.....G.....M..V.....K.....                              | 240 |
|         |     |                                                                 |     |
| Cow     | 241 | DGDEKYEKTVIKSGDKMFYKFMKRIAACQE QILRY SWSGEPLFLTCPTSEVTELPACSYC  | 300 |
| Giraffe | 241 | .....R.I.....H.                                                 | 300 |
| Okapi   | 241 | .....I.....I.....H.                                             | 300 |
|         |     |                                                                 |     |
| Cow     | 301 | GARRIFEFQLMPALVSM LRSANLDLSVEFGTIL IYTCEKSCWPQNDQAPMEEFCIIQEDP  | 360 |
| Giraffe | 301 | ....V.....V.....I.....                                          | 360 |
| Okapi   | 301 | .....V.....I.....                                               | 360 |
|         |     |                                                                 |     |
| Cow     | 361 | DELLFK                                                          | 366 |
| Giraffe | 361 | .....                                                           | 366 |
| Okapi   | 361 | .....                                                           | 366 |

**Newick Tree of Mammalian PDCD2L**

(bushbaby:0.0637978, ((rhesus\_monkey:0.0240491, (human:0.00359046, orangutan:0.0104749):0.0040552):0.0596258, ((elephant:0.0545039, manatee:0.0618291):0.0665387, ((rhino:0.0528277, (((walrus:0.0191956, weddel\_seal:0.0226637):0.0193703, panda:0.0319915):0.0026076, polecat:0.0551402):0.00288622, dog:0.058893):0.00901244, cat:0.0672426):0.0157226):0.0117629, ((alpaca:0.0165552, camel:0.0225659):0.0593276, pig:0.08493):0.00229234, (((dolphins:0.00399435, orca:0.00976145):0.0106728, baiji\_dolphin:0.0101595):0.0138221, sperm\_whale:0.035824):0.00514097, minke\_whale:0.0178994):0.0211134, ((cow:0.00437979, yak:0.0038508):0.0143783, water\_buffalo:0.0205185):0.0122919, (giraffe:0.0295816, okapi:0.0150087):0.010454):0.0309843):0.0112464):0.00779422):0.0165112):0.0201117):0.0637978);

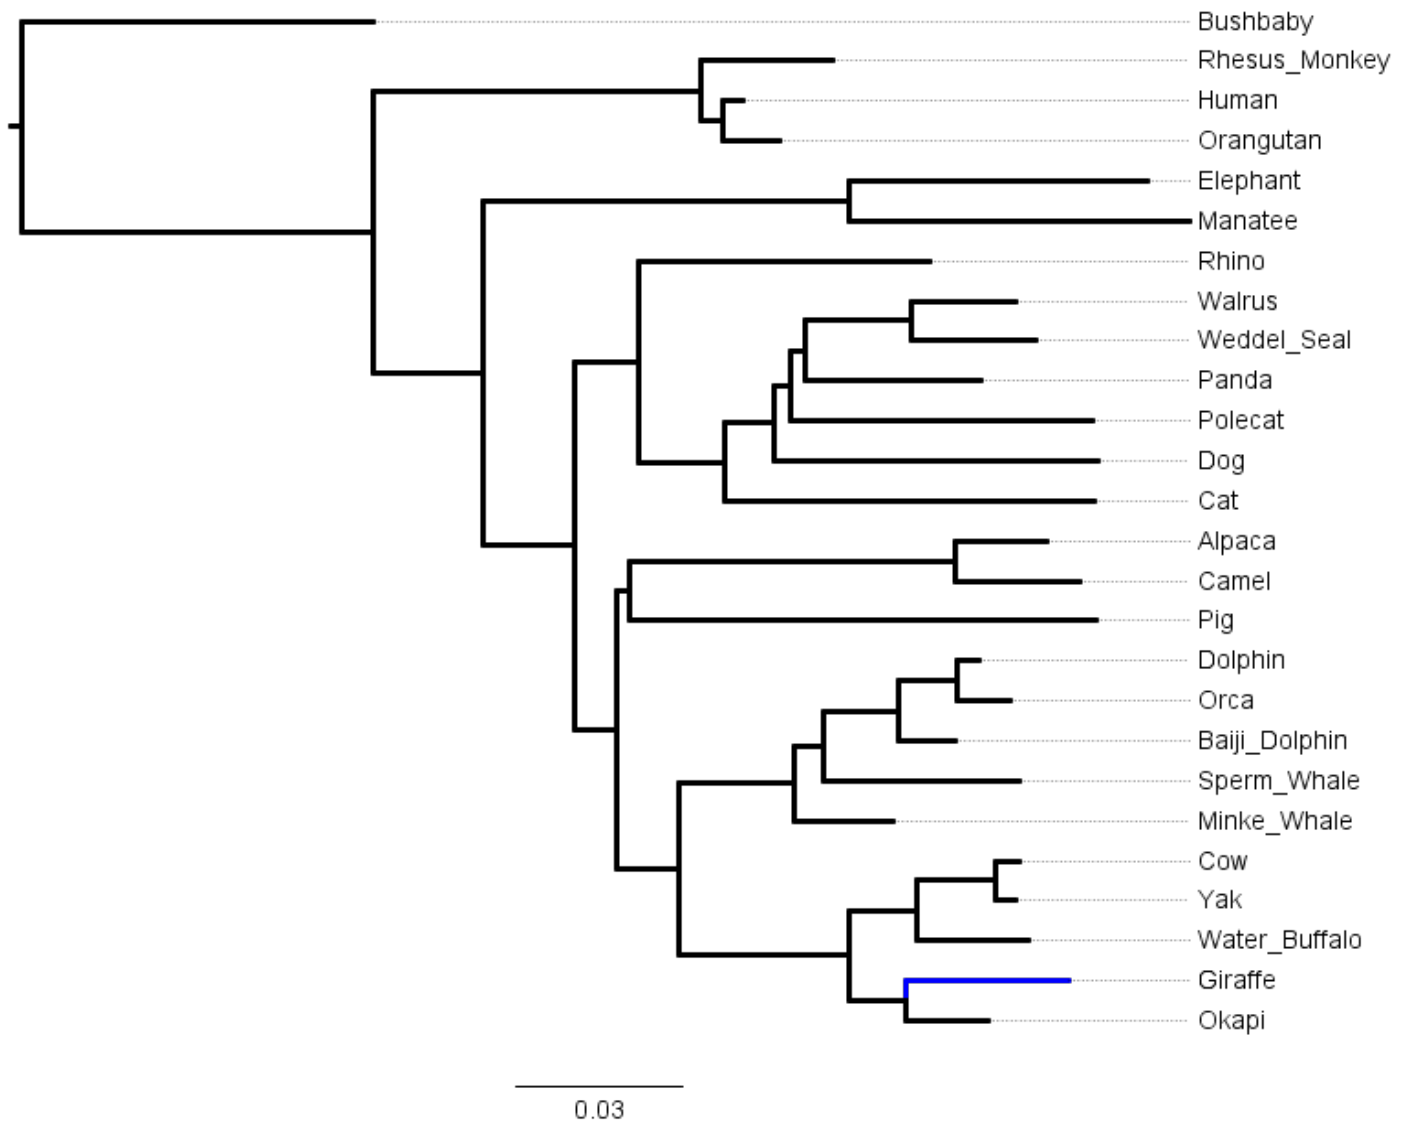

Locus Name: programmed cell death 2-like (PDCD2L)



**Locus Name: cMyc**

ENSBTAT0000011066 MYC-201 transcription factor cell proliferation, growth control, oncogene

mouse: Mutations affect growth and development of heart, pericardium, neural tube, vasculogenesis and erythropoiesis. Homozygous null mutants die by embryonic day 10.5. Heterozygotes have reduced body size and multiorgan hypoplasia;

PP2: (Giraffe) L3Y; (Giraffe/Okapi) G108S, P207S, A209D

Giraffe: L3Y UPS, V5A UPS, S79A UPS, A215S UPS

Giraffe/Okapi: R83K UPS, G108S UIS, A209D UPS, L224F UIS

Okapi: L3H UPS, V5S UPS, N9H UPS, C25Y UIS, S347C UIS

**Protein sequence Alignment of Cow, Giraffe and Okapi**

|         |     |                                                               |     |
|---------|-----|---------------------------------------------------------------|-----|
| Cow     | 1   | MPLNVSFANKNYDLDDYDVQPYFYCDEEENFYHQQQQSELQPPAPSEDIWKKFELLPTPP  | 60  |
| Giraffe | 1   | ..Y.A...SR.....                                               | 60  |
| Okapi   | 1   | ..H.S...HR.....H...Y.....                                     | 60  |
|         |     |                                                               |     |
| Cow     | 61  | LSPSRRSGLCSPSYVAVASFSPRGDDDDGGGGSFSSADQLEMVTELLGGDMVNQSFICDPD | 120 |
| Giraffe | 61  | .....F...A...K...G.....R.....S.....                           | 120 |
| Okapi   | 61  | .....F..T....K...G.....R.....S.....                           | 120 |
|         |     |                                                               |     |
| Cow     | 121 | DETLIKNIIIQDCMWSGFSAAAKLVSEKLASVQAARKDGGSPSPARGHGGCSTSSLYLQD  | 180 |
| Giraffe | 121 | ...F.....                                                     | 180 |
| Okapi   | 121 | ...F.....                                                     | 180 |
|         |     |                                                               |     |
| Cow     | 181 | LSAAASECIDPSVVFYPLNDSSSPKPCASPSTAFSPSSDLLSSAESSPRASPEPLAL     | 240 |
| Giraffe | 181 | .....S.D....S.....F.....                                      | 240 |
| Okapi   | 181 | .....S.D....S.....F.....                                      | 240 |
|         |     |                                                               |     |
| Cow     | 241 | HEETPPTTSSDSEEEQEDEEEDIVVSVEKRQPPAKRSESGSPSAGSHSKPPHSPLVLKRC  | 300 |
| Giraffe | 241 | .....                                                         | 300 |
| Okapi   | 241 | .....                                                         | 300 |
|         |     |                                                               |     |
| Cow     | 301 | HVSTHQHNYAAPSTRKDYPAAKRAKLDGRVVKQISNNRKCASPRSSDTEENDKRRTHN    | 360 |
| Giraffe | 301 | .....                                                         | 360 |
| Okapi   | 301 | .....T.....C.....                                             | 360 |
|         |     |                                                               |     |
| Cow     | 361 | VLERQRRNELKRSFFALRDQIPELENNEKAPKVVILKKATAYILSVQAEQQKLKSEIDVL  | 420 |
| Giraffe | 361 | .....E...I..K...                                              | 420 |
| Okapi   | 361 | .....T.E...I..K...                                            | 420 |
|         |     |                                                               |     |
| Cow     | 421 | QKRREQLKLEQIRNSCA                                             | 439 |
| Giraffe | 421 | R.....                                                        | 439 |
| Okapi   | 421 | R.....                                                        | 439 |

**Newick Tree of Mammalian**

(mouse:0.0233071, (((baboon:0.00407647, human:0.00278075):0.00844617, rhesus\_monkey:0.00304353):0.00302863, orangutan:0.0149023):0.023451, (bushbaby:0.0344622, ((manatee:0.01719, elephant:0.0106576):0.0248904, (rabbit:0.020061, (((polecat:0.000163893, panda:0.00440234):0.00702407, dog:0.00677006):0.00247914, (rhino:0.0148197, horse:0.0224893):0.00844672):0.00170805, (alpaca:0.00484276, pig:0.0112688):0.00379907, ((dolphin:0.00517125, orca:0.00168597):0.0148027, ((sheep:0.000552616, (water\_buffalo:0.00623665, cow:0.00983787):0.00286794):0.00254809, (giraffe:0.00773998, okapi:0.0175805):0.0197851):0.011432):0.00142065):0.00297063):0.00105204):0.00109731):0.00607101):0.00316987):0.0233071);

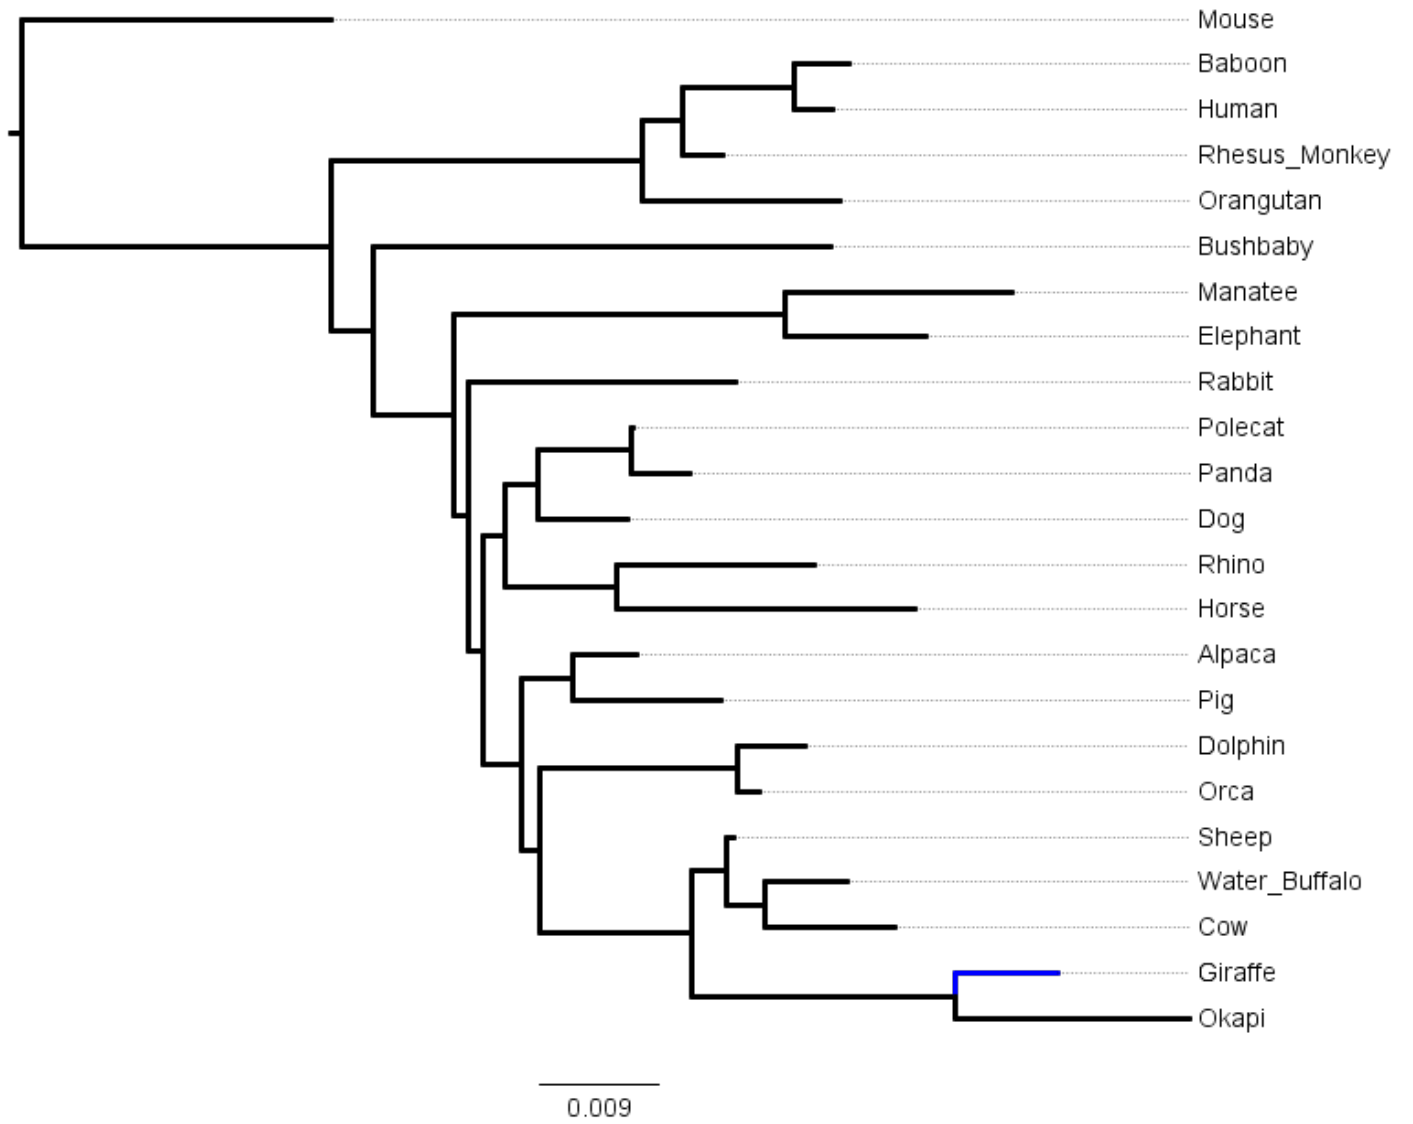

Locus Name: cMyc

**Locus Name: E2F transcription factor 4 (E2F4)**

ENSBTAT00000015999 E2F4-201 transcription factor cell proliferation, growth control, craniofacial, erythroid  
mouse: mice die postnatally of an increased susceptibility to bacterial infection and exhibit craniofacial defects, erythroid abnormalities, and growth retardation.

PP2: P252H

Giraffe: P252H UPS, P254L UPS, V255I UIS, S284N UPS, E286D UIS  
Giraffe/Okapi/Gerenuk: V402A UIS

**Protein sequence Alignment of Cow, Giraffe and Okapi E2F4**

|         |     |                                                                |     |
|---------|-----|----------------------------------------------------------------|-----|
| Cow     | 1   | MAEAGPQAPPPPGTSPSRHEKSLGLLTTKFVSLIQEAKDGVLDLKLAAADTLAVRQKRRIYD | 60  |
| Giraffe | 1   | .....                                                          | 60  |
| Okapi   | 1   | .....                                                          | 60  |
|         |     |                                                                |     |
| Cow     | 61  | ITNVLEGIGLIEKSKNSIQWKGVGPNCNTREIADKLIELKAEIEELQQREQLDQHKVW     | 120 |
| Giraffe | 61  | .....                                                          | 120 |
| Okapi   | 61  | .....                                                          | 120 |
|         |     |                                                                |     |
| Cow     | 121 | VQQSIRNVTEDEVHNSPHTLAYVTHEDICRCFAGDTLLAIRAPSGTSLEVPIPEGLNGQKK  | 180 |
| Giraffe | 121 | .....Q.....                                                    | 180 |
| Okapi   | 121 | .....Q.....                                                    | 180 |
|         |     |                                                                |     |
| Cow     | 181 | YQIHLKSVSGPIEVLLVNKEAWSSPPVAVVPPPEDLLQNPPAVSTPPLLKPSLAQPQD     | 240 |
| Giraffe | 181 | .....S.....A...S..                                             | 240 |
| Okapi   | 181 | .....S.....A.....                                              | 240 |
|         |     |                                                                |     |
| Cow     | 241 | ASRPSSPQATTPNPVPSSTEAQGVAGPAAEIPVSGGHGTESKDSGELSSSLPLGLAALDTR  | 300 |
| Giraffe | 241 | .....H.LI.....N..N.D.....                                      | 300 |
| Okapi   | 241 | .....N.....                                                    | 300 |
|         |     |                                                                |     |
| Cow     | 301 | PLQSSALLDSSSSSSNSSSSGPNPSTSFPEPIKADPTGVLELPKELSEIFDPTRECMSEL   | 360 |
| Giraffe | 301 | .....                                                          | 360 |
| Okapi   | 301 | .....                                                          | 360 |
|         |     |                                                                |     |
| Cow     | 361 | LEELMSSEVFAPLLRLSPPPGDHDYIYNLDESEGVCDLFDVPVLNL                 | 406 |
| Giraffe | 361 | .....A.....                                                    | 406 |
| Okapi   | 361 | .....A.....                                                    | 406 |

**Newick Tree of Mammalian E2F4**

(dolphin:0.0338304, (orca:0.0028308, (spermwhale:0.0098671, (minke whale:0.0033991, (((waterbuffalo:0.00462629, (cow:0, yak:3.66971e-06):0.00282723):0.00429898, (gerenuk:0.000435762, (giraffe:0.0143575, okapi:0.000568709):0.0020552):0.0029183):0.00160793, (tibetantlp:0.00622668, goat:0):0.0013208):0.0144871, ((cat:0.0195981, (dog:0.00918394, walrus:0.0187758):0.00984373):0.00798754, (manatee:0.0301534, (bushbaby:0.0256082, (baboon:0.00694266, (human:0.00464845, orangutan:0.00513173):0.00531368):0.00860929):0.00230165):0.00415335):0.00175748):0.00161818, ((pig:0.0114845, starnosemole:0.0237023):0.00255027, ((rhino:0.00607722, horse:0.0319593):0.00163675, camel:0.0126628):0.0003507):0.00142501):0.011978):0.00212959):0.00304652):0.0338304);

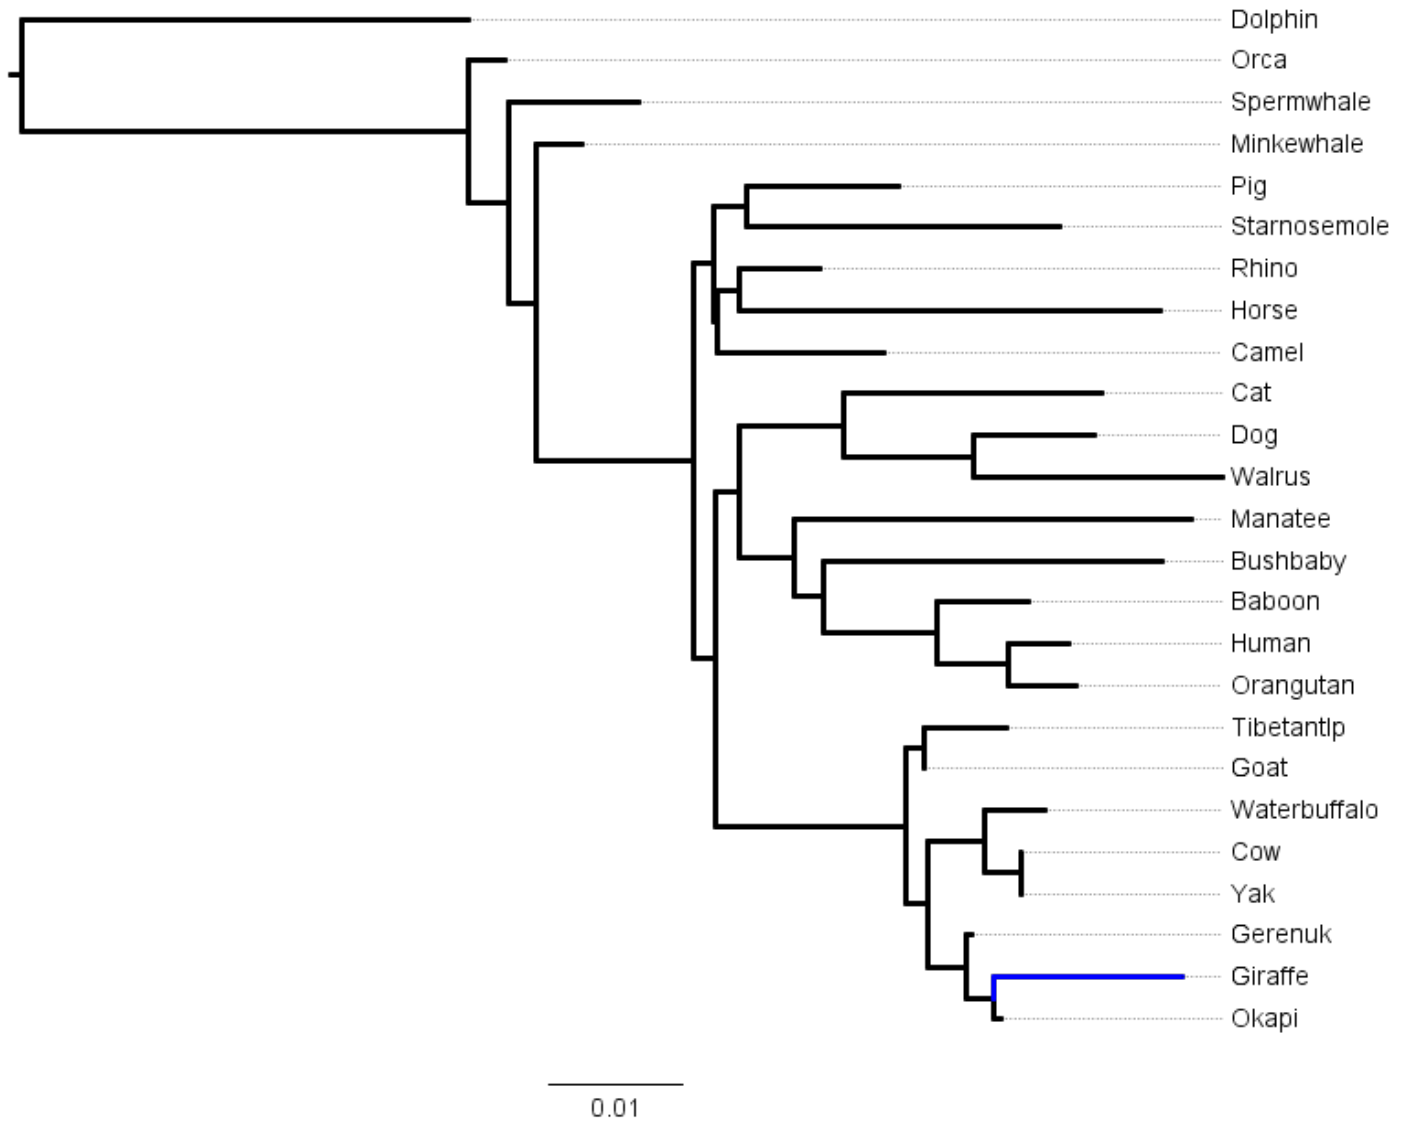

**Locus Name: E2F transcription factor 4 (E2F4)**

**Locus Name: E2F transcription factor 5 (E2F5)**

ENSBTAT00000012342 E2F5-201 transcription factor cell proliferation, growth control, brain

mouse: Homozygous null mice develop non-obstructive hydrocephalus, ruffled coats, ataxic gait, and dehydration after weaning and die prematurely at an average age of 6 weeks. They exhibit dilated ventricles and cerebral cortex atrophy.

PP2: (Giraffe) S8C, T59A, V240M, P262T

Giraffe: H150R UIS, K162E UIS, T183V UPS, E199Q UIS, V202G UPS, I223V UIS

Giraffe/Okapi: V196M UIS

**Protein sequence Alignment of Cow, Giraffe and Okapi E2F5**

|         |     |                                                               |     |
|---------|-----|---------------------------------------------------------------|-----|
| Cow     | 1   | KQAADTLAVRQKRRIYDITNVLEGIDLIEKKSNSIQWKGVGAGCNTKEVIDRLKYLKAE   | 60  |
| Giraffe | 45  | .A.....R.....                                                 | 104 |
| Okapi   | 1   | .....R.....                                                   | 60  |
|         |     |                                                               |     |
| Cow     | 61  | IEDLELKERELDQQKLWLQOSIKNVMDDSINNSTFSYVTHE DICNCFNGDTLLAIQAPSG | 120 |
| Giraffe | 105 | .....                                                         | 164 |
| Okapi   | 61  | .....                                                         | 120 |
|         |     |                                                               |     |
| Cow     | 121 | TQLEVPIPEMGQNGQKKYQINLKSHSGPIHVLLINKESSSSKPVVFPVPPDDLAQPPSQ   | 180 |
| Giraffe | 165 | .....R.....E.M.....T.....                                     | 224 |
| Okapi   | 121 | .....M.....T.....                                             | 180 |
|         |     |                                                               |     |
| Cow     | 181 | PPTVPPHPKSSAVQSLPEPPVRSERSQPLQHTPATDLSSAGSISGDIIDELMSSDVFPLL  | 240 |
| Giraffe | 225 | .SV.....T.A....Q..G....D.....V..V.....                        | 284 |
| Okapi   | 181 | .S.....T.....S.....                                           | 240 |
|         |     |                                                               |     |
| Cow     | 241 | RLSPTPADDYNFNLDDEGVCDFDVQILNY                                 | 272 |
| Giraffe | 285 | .....                                                         | 316 |
| Okapi   | 241 | .....                                                         | 272 |

**Newick Tree of Mammalian E2F5**

(bushbaby:0.0270778, ((human:0.00661856, (baboon:0, rhesus:0.00298982):0.0109568):0.0154364, (((orca:0, baiji\_dolphin:0.00488271):0.012942, pig:0.0197488):0.00219206, (cat:0, walrus:0.00690869):0.0037662):0.0074477, (armadillo:0.0238996, aardvark:0.0237464):0.00184229, ((sheep:0.000250682, goat:0.00726822):0.00727791, (water\_buffalo:0.00319492, cow:0.00319492):0.00892585, (giraffe:0.0276732, okapi:0.00122529):0.00918804):0.0038863):0.0202626):0.00576561):0.00263753):0.0270778);

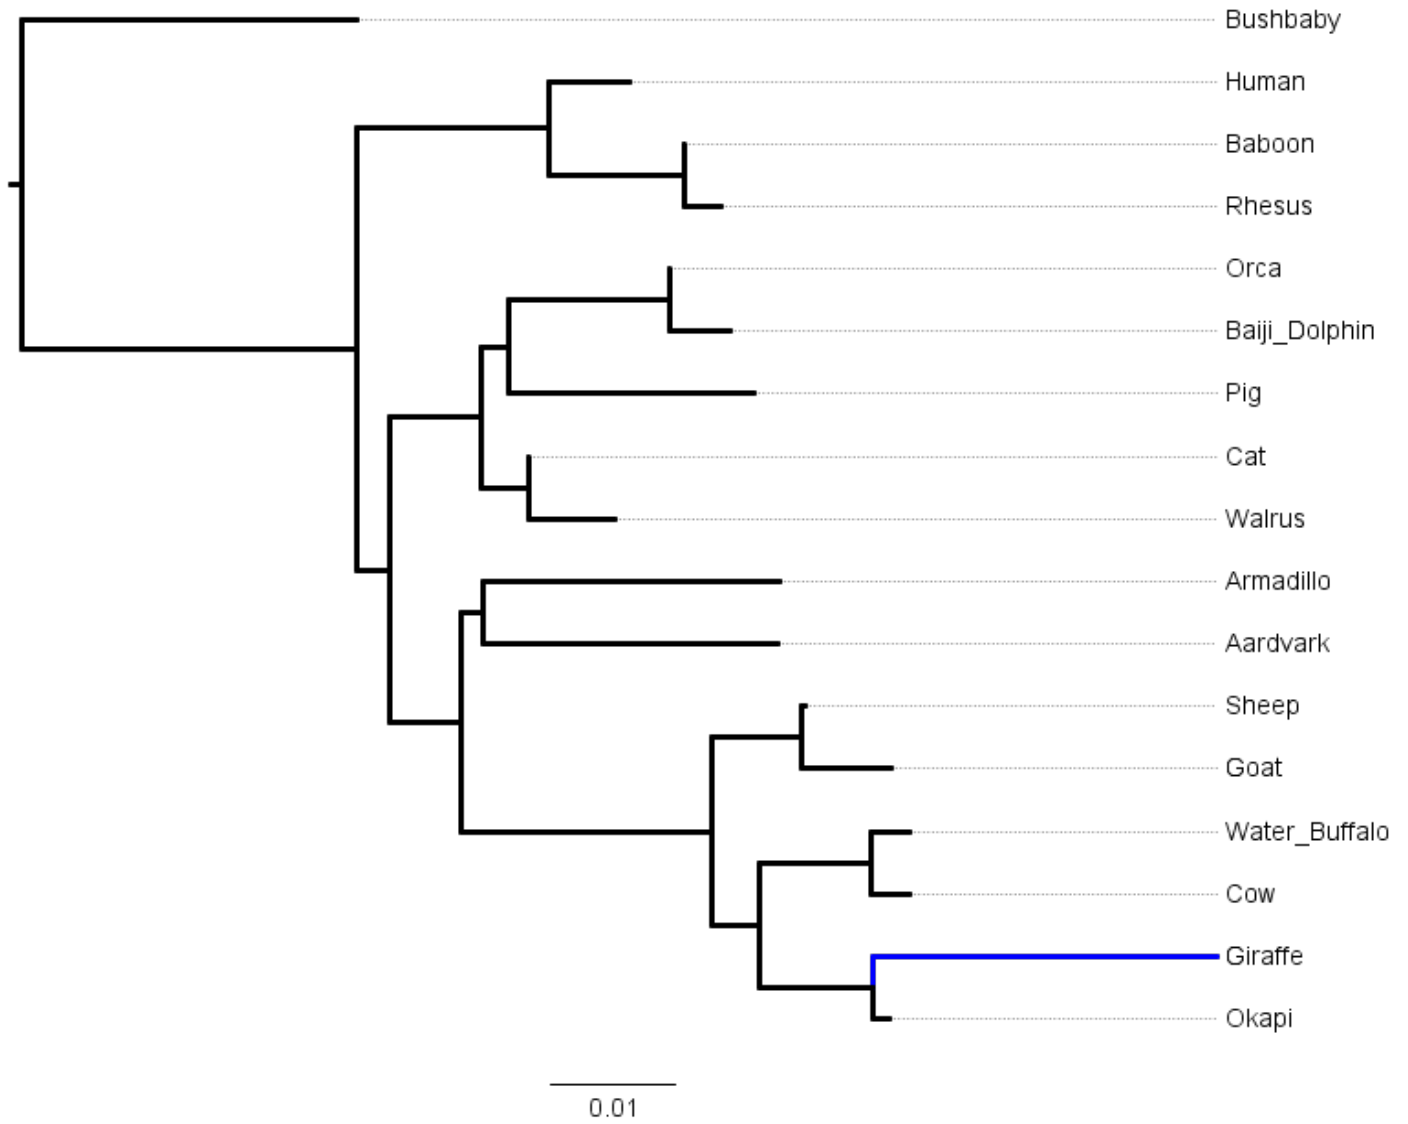

**Locus Name: E2F transcription factor 5 (E2F5)**

**Locus Name:** E26 avian leukemia oncogene homolog (**ETS2**)

ENSBTAT0000012144 ETS2-201 ETS transcription factor somitogenesis, heart development  
mouse: expressed in posterior compartment of somites, short neck phenotype when overexpressed in mice

PP2: NO DAMAGING HITS

Giraffe/Okapi: S42A UIS

**Protein sequence Alignment of Cow, Giraffe and Okapi ETS2**

|         |     |                                                              |     |
|---------|-----|--------------------------------------------------------------|-----|
| Cow     | 1   | MNDFGIKNDQVAPVASSYRGTLKRQAAFDTFDGSL LAVFPSLNEEQTLQEVPTGLDSIS | 60  |
| Giraffe | 1   | .....I..A.S.....                                             | 60  |
| Okapi   | 1   | .....A.....                                                  | 60  |
|         |     |                                                              |     |
| Cow     | 61  | HDSANCELPLLTPCSKAVMSQALKATFSGFKKEQRRIGIPKNPWLWTEQQVCQWLLWATN | 120 |
| Giraffe | 61  | .....                                                        | 120 |
| Okapi   | 61  | .....                                                        | 120 |
|         |     |                                                              |     |
| Cow     | 121 | EFSLVDVNLQRFGMTGQVLCNLGKERFLELAPDFVGDILWEHLEQMIKENQEKNEQYEE  | 180 |
| Giraffe | 121 | .....D.....T.....                                            | 180 |
| Okapi   | 121 | .....D.....T.....                                            | 180 |
|         |     |                                                              |     |
| Cow     | 181 | NSHLNSVPHWINSNSLGFGEQAPYGMQTQSYPKGGLLDGLCPASSAPSTLGPEQDFQMF  | 240 |
| Giraffe | 181 | .....I.....G.....                                            | 240 |
| Okapi   | 181 | .....I.....G.....                                            | 240 |
|         |     |                                                              |     |
| Cow     | 241 | PKARLNTVSVNYCSVGQDFPAGSLNLLSSASGKPRDHDSAETGGDSFESSESLQSWNSQ  | 300 |
| Giraffe | 241 | .....S.....S.....                                            | 300 |
| Okapi   | 241 | .....S.....                                                  | 300 |
|         |     |                                                              |     |
| Cow     | 301 | SLLLDVQRVPSFESFEDDCSQSLGLSKPTMSFKDYIQDRSDPVEQKPVIPAAVLGFTG   | 360 |
| Giraffe | 301 | .....                                                        | 360 |
| Okapi   | 301 | .....                                                        | 360 |
|         |     |                                                              |     |
| Cow     | 361 | SGPIQLWQFLELLSDKSCQSFISWTGDGWEFKLADPDEVARRWGKRKNPKMNYEKLSR   | 420 |
| Giraffe | 361 | .....                                                        | 420 |
| Okapi   | 361 | .....                                                        | 420 |
|         |     |                                                              |     |
| Cow     | 421 | GLRYYYDKNIIHKTSKGKRYVYRFVCDLQNLGFTPEELHAILGVQPDTE            | 470 |
| Giraffe | 421 | .....                                                        | 470 |
| Okapi   | 421 | .....                                                        | 470 |

**Newick Tree of Mammalian ETS2**

(rat:0.0303961, (((gorilla:0.00422325, (rhesus:0, baboon:0):0.00434222):0.000103139, human:0):0.0238534, lemur:0.0424498):0.0049381, (((rhino:0.0292759, horse:0.0276629):0.0114245, ((walrus:0.0109447, polecat:0.017169):0.00216096, panda:0.0119058):0.00563472, dog:0.0255789):0.0130936):0.00238709, (camel:0.00313301, alcapa:0.00537778):0.0157604, (orca:0.0196581, ((yak:0.000992099, cow:0.00327231):0.00131552, (tibetan\_antelope:0.00585099, goat:0.0048445):0.00297886):0.00113061, (giraffe:0.00560933, okapi:0.000780512):0.00859034):0.0155565):0.00986514):0.0168361):0.00439006):0.0303961);

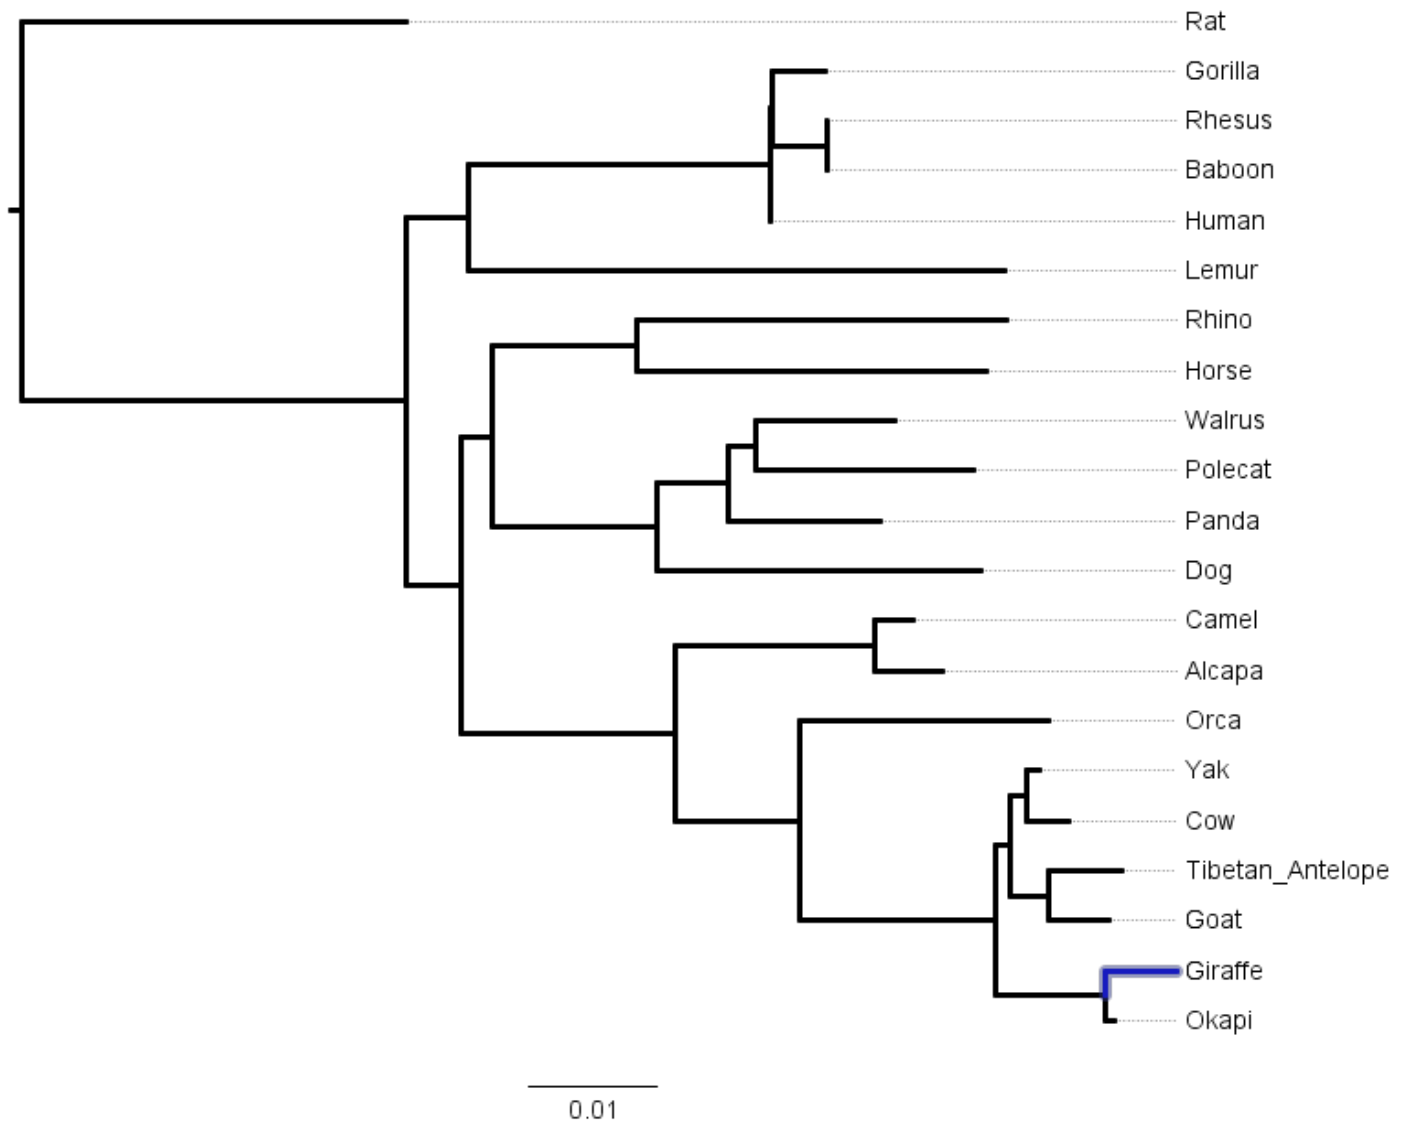

**Locus Name: E2F transcription factor 5 (E2F5)**



**Locus Name: Transforming Growth Factor, Beta 1 (TGFB1)**

ENSBTAT00000027261 TGFB1-201 secreted growth factor growth control, bone growth, heart mouse: wasting syndrome accompanied by a multifocal, mixed inflammatory cell response and tissue necrosis, leading to organ failure and death; Camurati-Engelmann disease (CE) [MIMOUSE:131300]: Autosomal dominant disorder characterized by hyperostosis and sclerosis of the diaphyses of long bones.

PSG (Giraffe) N230D 0.965\*, G242T 0.977\*, H276N 0.972\*, N283D 0.966\*, A360V 0.963\*  
PP2: None

Giraffe: E215G UPS, N230D UIS, S241F UPS, G242T UPS, H275D UPS

**Protein sequence Alignment of Cow, Giraffe and Okapi TGFB1**

|         |     |                                                               |     |
|---------|-----|---------------------------------------------------------------|-----|
| Cow     | 1   | MPPSGLRLLPLLLLPLLWLLMLTPGRPVAGLSTCKTIDMELVKRKRIEAIKQILSKLRLA  | 60  |
| Giraffe | 1   | .....                                                         | 60  |
| Okapi   | 1   | .....L..L.....                                                | 60  |
|         |     |                                                               |     |
| Cow     | 61  | SPPSQGDVPPGPLPEAILALYNSTRDRVAGESAETEPEPEADYYAKEVTRVLMVEYGNKI  | 120 |
| Giraffe | 61  | .....                                                         | 120 |
| Okapi   | 61  | .....                                                         | 120 |
|         |     |                                                               |     |
| Cow     | 121 | YDKMKSSSHSIYMFFNTSELREAVPEPVLLSRADVRLRLKLVKVEQHVELYQKYSNNSWR  | 180 |
| Giraffe | 121 | .E.....EL.....                                                | 180 |
| Okapi   | 121 | .E.....EL.....                                                | 180 |
|         |     |                                                               |     |
| Cow     | 181 | YLSNRL LAPSDSPEWLSFDVTVGVVRQWLTRREEIEGFRLSAHCSCDSKNTLQVDINGFS | 240 |
| Giraffe | 181 | .....T...G.....D.....                                         | 240 |
| Okapi   | 181 | .....T.....                                                   | 240 |
|         |     |                                                               |     |
| Cow     | 241 | SGRRGDLATIHGMNRPFLLLMATPLERAQHLHSSRHRRALDTNYCFSSTEKNCCVRQLYI  | 300 |
| Giraffe | 241 | FT.....N.....D.....                                           | 300 |
| Okapi   | 241 | .....                                                         | 300 |
|         |     |                                                               |     |
| Cow     | 301 | DFRKDLGWKWIHEPKGYHANFCLGPCYIWSLDTQYSKVLALYNQHNPASAAAPCCVPQA   | 360 |
| Giraffe | 301 | .....V                                                        | 360 |
| Okapi   | 301 | .....                                                         | 360 |
|         |     |                                                               |     |
| Cow     | 361 | LEPLPIVYVGRKPKVEQLSNMIVRSCKCS                                 | 390 |
| Giraffe | 361 | .....                                                         | 390 |
| Okapi   | 361 | .....                                                         | 390 |

**Newick Tree of Mammalian TGFB1**

((mouse:0.00378357, rat:0.00912019):0.0334887, ((rhino:0.0293755, horse:0.0369224):0.0112504, ((dog:0.00837452, cat:0.00713029):0.0131879, (elephant:0.0190146, manatee:0.0227791):0.022475, aardvark:0.0421213):0.0164466):0.00456622, (((rhesus:0.00513782, orangutan:4.3558e-05):1.69522e-05, human:0.00513782):0.000183285, baboon:0):0.0190894, (((baiji\_dolphin:0.0115145, minke\_whale:0.00893155, orca:0.00397221):0.00145376):0.01084, alpaca:0.00873049):0.00543237, pig:0.0332531):0.00319142, (((cow:0.00139774, sheep:0.00374368):0.00406499, (tibetan\_antelope:0, goat:0):0.00108642):0.000951564, (yak:0, water\_buffalo:4.28948e-06):0.000333817):0.00134935, (giraffe:0.0178524, okapi:0.00549713):0.0038499):0.0202923):0.00459478):0.00189038):0.00728277):0.0334887);

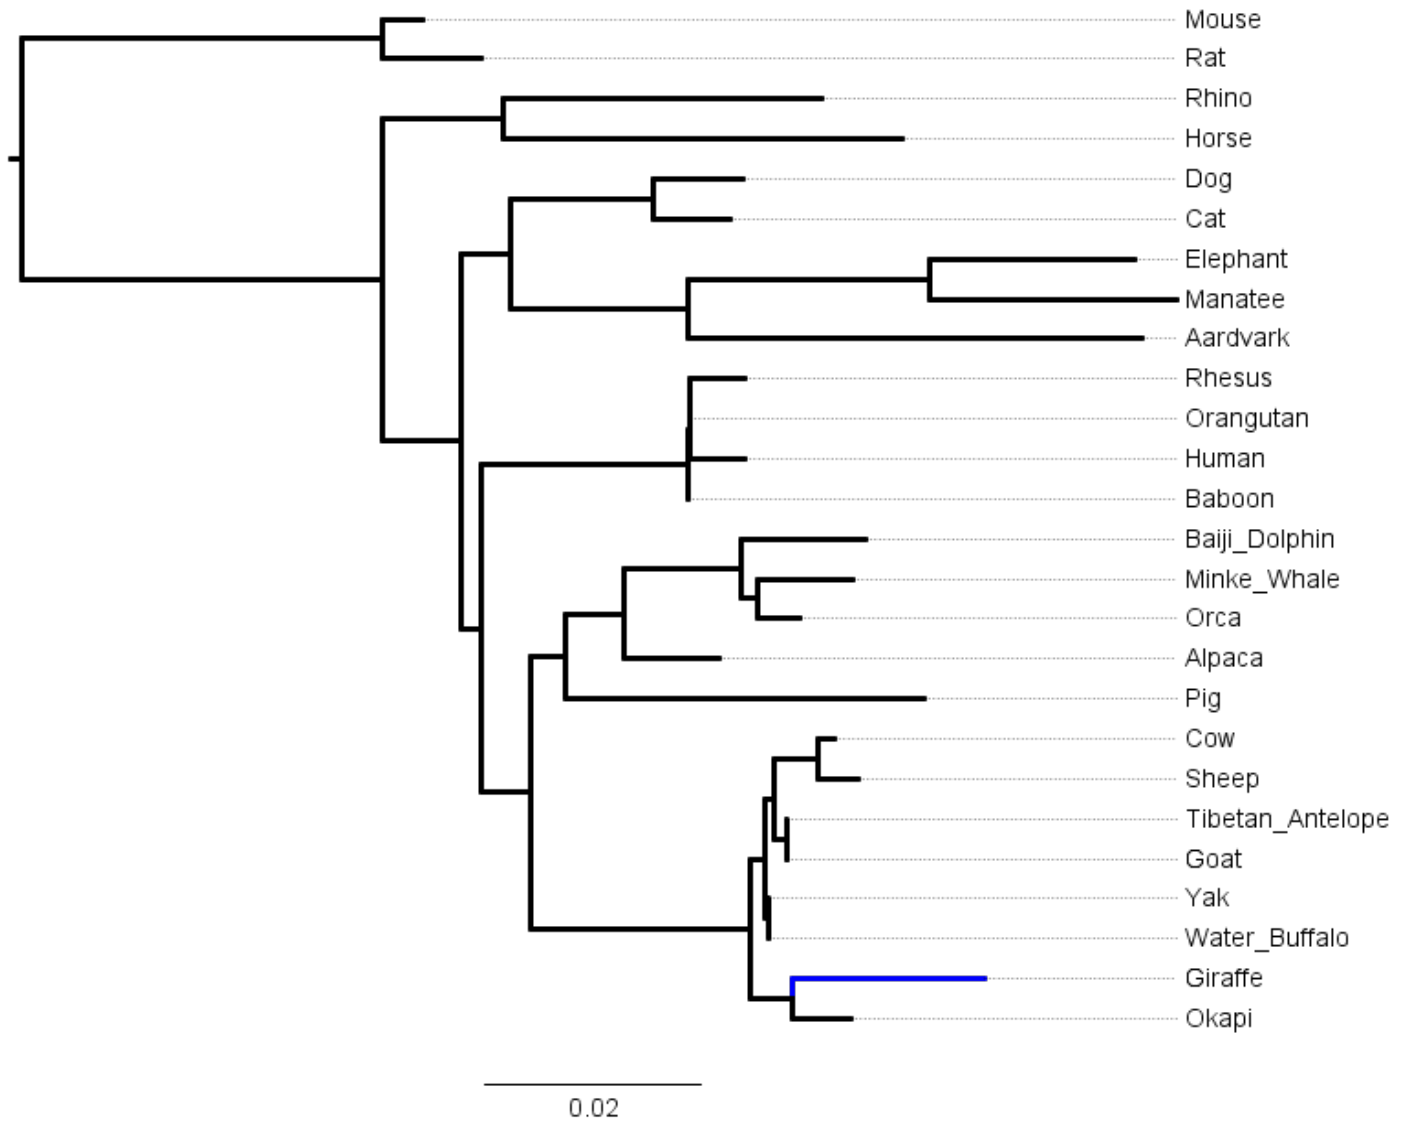

**Locus Name: Transforming Growth Factor, Beta 1 (TGFB1)**

**Locus Name:** Aldehyde dehydrogenase family 16 member A1 (**ALDH16A1**)

ENSBTAT0000043139 ALDH16A1-201 aldehyde dehydrogenase eye development  
mouse: abnormal retinal development in mouse

PP2: (Giraffe) W120R, E600H, H728Y; (Giraffe/Okapi) L262M; (Okapi) R129Q, R132Q, L704M

Giraffe: A7P UPS, A505T UPS, A561P UIS, Q598H UPS, N603S UPS, E669Q UPS, H726Y UIS, L740V UPS  
Giraffe/Okapi: S174P UPS, L497V UPS

**Protein sequence Alignment of Cow, Giraffe and Okapi ALDH16A1**

|         |     |                                                              |     |
|---------|-----|--------------------------------------------------------------|-----|
| Cow     | 1   | MAARTASRACEIFTTLEYGPAPESHACALAWLDTQDRHLGHYVNGQWLKPEHRSSVPCQ  | 60  |
| Giraffe | 1   | .....P.....                                                  | 60  |
| Okapi   | 1   | .....N.....                                                  | 60  |
| Cow     | 61  | DPITGENLASCLQAQSEDVAAAVEAARASLENWSTQPGAIRAQHLTRLAKVIQKHQRLW  | 120 |
| Giraffe | 61  | .....F.....R                                                 | 120 |
| Okapi   | 61  | .....F.....A...Q...                                          | 119 |
| Cow     | 121 | TLESVLTGRAVREVRDRDVPLAQQLLYHAVQAHTQEEALAGWEPMGVIGLILSPTFPFL  | 180 |
| Giraffe | 121 | .....P.....                                                  | 180 |
| Okapi   | 120 | .....Q..Q...--S.....N.....T.....M.P.....                     | 177 |
| Cow     | 181 | DMMWRICPALAVGCTVVVLVPPASPTPLLLAQLAGELGPFPGILNVISGPASLGPVLAAQ | 240 |
| Giraffe | 181 | N.....S.....                                                 | 240 |
| Okapi   | 178 | N.....Q.....S.....                                           | 237 |
| Cow     | 241 | PGVQKVAFCGAIEEGRALRRTLAWVPELGLALGAESLLLLTEVADVDSAVEGIVDAAWS  | 300 |
| Giraffe | 241 | .....M...G...S.....                                          | 300 |
| Okapi   | 238 | .....M...G...S.S.....                                        | 297 |
| Cow     | 301 | DRSPGGLRLLIQEAVWDETMRRQLQERMGRRCGHGLDGAVDMGARGAAARDLAQRYVSEA | 360 |
| Giraffe | 301 | ..G.....R.....T.....R..                                      | 360 |
| Okapi   | 298 | ..G.....R.....T.....R..                                      | 357 |
| Cow     | 361 | QSQGAQVFQAGSEPSDSPFFPPTLVSDLPPASPTQAEVWPPLVVASPFRTAKEALAVAN  | 420 |
| Giraffe | 361 | .....V.....                                                  | 420 |
| Okapi   | 358 | .....V.....                                                  | 417 |
| Cow     | 421 | GTPRGGASVWSERLGQALELAYGLVQGTVWINAHGLRDPVPTGGCKESGSSWHGGQDG   | 480 |
| Giraffe | 421 | .....M.....                                                  | 480 |
| Okapi   | 418 | .....H.....                                                  | 477 |
| Cow     | 481 | LYEYLRPSGTPAWIPYLSKTLNYDAFGLALPSTL--PAGPET--GPAP--PYGLFVGGRF | 534 |
| Giraffe | 481 | .....V..S...T.....-ILP.....GE..ET.....                       | 537 |
| Okapi   | 478 | .....V..S.....LL-.....GE..V.--.....                          | 534 |
| Cow     | 535 | QAPGARSSRPIQDSQGSQGYVAEGGAKDIRGAVEAAHQAAPGWMSQSPAARAALLWALA  | 594 |
| Giraffe | 538 | .....N.H.....P.....G.....                                    | 597 |
| Okapi   | 535 | .....H.....G.....                                            | 594 |
| Cow     | 595 | AALQRREPNLVSRLERHGVELKVAKAEVELSVKRLRAWGARVQAQGCALQVAELRGPVLR | 654 |
| Giraffe | 598 | ..H...S.....                                                 | 657 |
| Okapi   | 595 | .....                                                        | 654 |
| Cow     | 655 | LREPLGVLAIVCPDEWPLLAFLVSLAPALAHGNTVVLVPSGACPIPALEVCQEMATLLPA | 714 |
| Giraffe | 658 | .....Q.....R.....                                            | 717 |
| Okapi   | 655 | .....M.....                                                  | 714 |
| Cow     | 715 | GLVNVVTGDRDHLTRCLALHQDIQALWYFGSAQGSQFVEWASAGNLKPVVVNRGCPRAWD | 774 |
| Giraffe | 718 | .....Y.....V.....                                            | 777 |
| Okapi   | 715 | .....                                                        | 774 |
| Cow     | 775 | QEAEGAGPELGRRAARTKALWLPMD                                    | 800 |
| Giraffe | 778 | .....L.....                                                  | 803 |
| Okapi   | 775 | .....L.....                                                  | 800 |

**Newick Tree of Mammalian ALDH16A1**

(lemur:0.030324, ((rhesus:0.0130267, ((gorilla:0.00903136, human:0.0149468):0.00214943, orangutan:0.013049):0.00892505):0.044449, (((panda:0.024959, walrus:0.0317876):0.00772496, polecat:0.0453532):0.00243257, dog:0.0463734):0.0271743, ((rhino:0.025468, horse:0.0349596):0.012711, ((alpaca:0.00868336, camel:0.00892807):0.033421, ((dolphin:0.00199813, orca:0.00425584):0.0396676, ((gerenuk:0.013941, goat:0.0107265, tibantlp:0.0109459):0.00452875):0.0031143, (cow:0.00310885, yak:0.0132754):0.00846929):0.00344326, (giraffe:0.0187481, okapi:0.0181837):0.00944829):0.0291017):0.0143796):0.00466941):0.007665):0.0227489):0.030324);

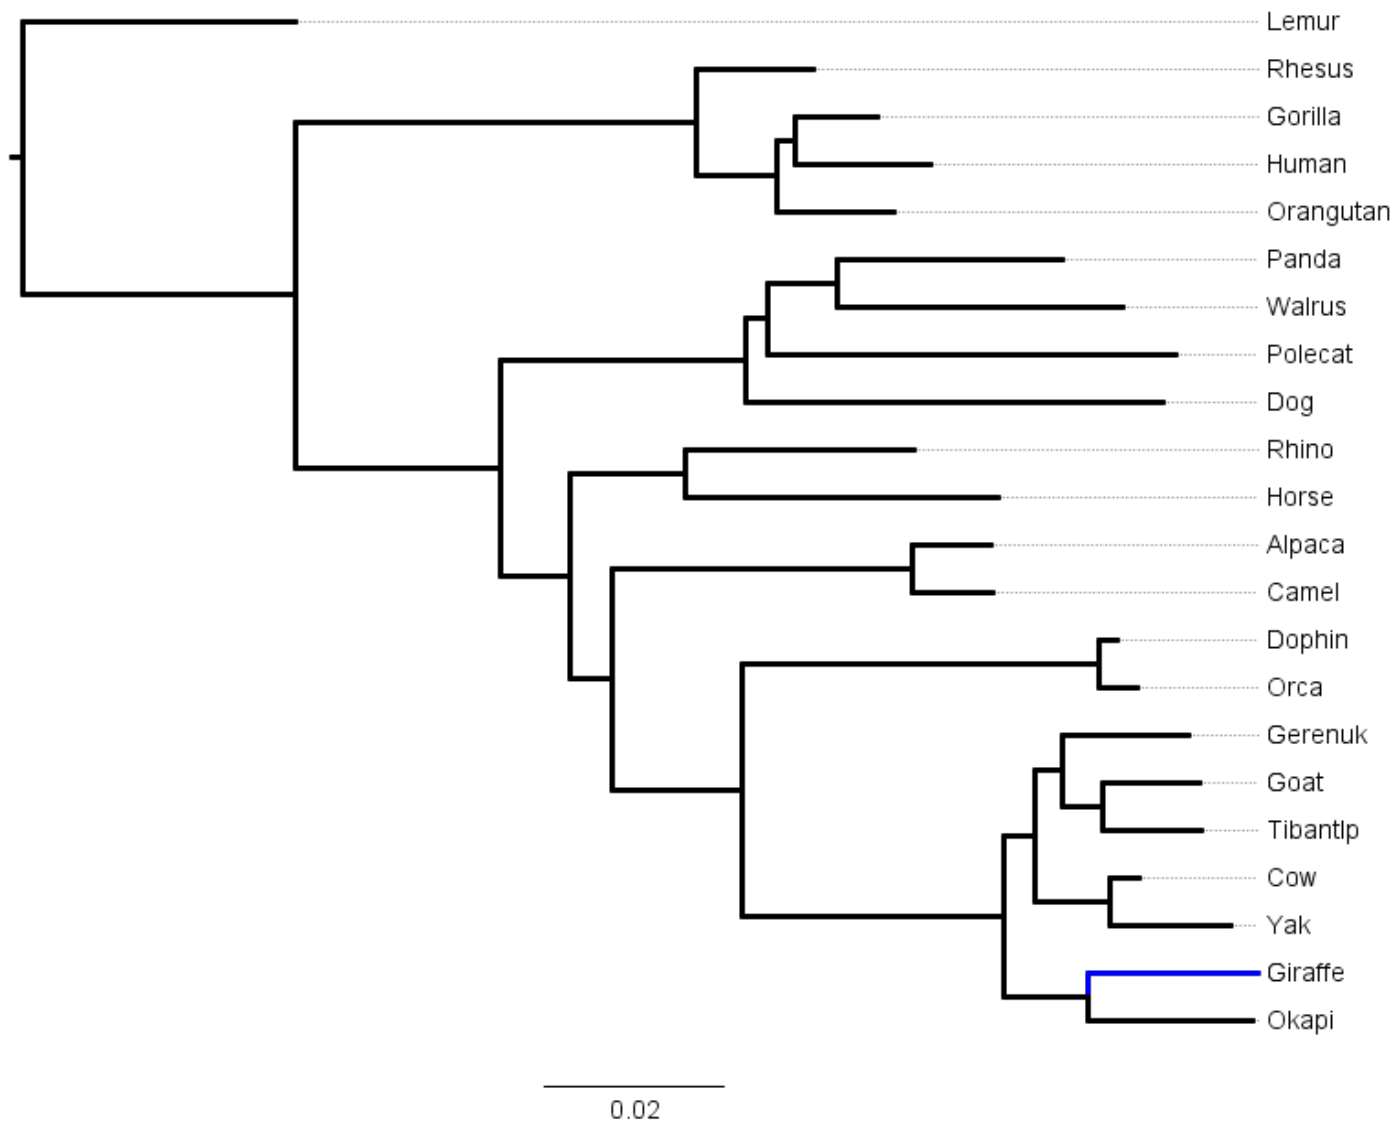

**Locus Name:** Aldehyde dehydrogenase family 16 member A1  
(ALDH16A1)

**Locus Name: Four And A Half LIM Domains 5 (FHL5)**

ENSBTAT0000002359 FHL5-201 Four-half lim domains testis, heart, brain human:  
GWAS for migraine headache, mouse: Male mice homozygous for disruptions of this gene have reduced  
sperm counts and abnormal sperm

PSG: (Giraffe) D242G, N251T

PP2: (Giraffe): R35C

Giraffe: R35C UPS, E49A UPS, D242G UIS, N251T UIS, I284S UPS

Giraffe/Okapi: D25N UIS

**Protein sequence Alignment of Cow, Giraffe and Okapi FHL5**

|         |     |                                                              |     |
|---------|-----|--------------------------------------------------------------|-----|
| Cow     | 1   | MTTPQFYCYCMASLLGKKYVLKDDNPYCVSCYDRIFSNYCEECKEPIESGSKDLCYKGH  | 60  |
| Giraffe | 1   | ...A.....N.....C.....A.....R                                 | 60  |
| okapi   | 1   | ...A.....N.....V.....R                                       | 60  |
|         |     |                                                              |     |
| Cow     | 61  | HWHEGCFNCTKCNHSLVEKPFPAKDERLLCSECYSNECSSKCFHCKKTIMPGSRKMEFKG | 120 |
| Giraffe | 61  | .....                                                        | 120 |
| Okapi   | 61  | .....                                                        | 120 |
|         |     |                                                              |     |
| Cow     | 121 | NYWHETCFVCEHCRQPIGTKPLISKESGNYCVPCFEKEFAHYCSFCKKVITSGGITFRDQ | 180 |
| Giraffe | 121 | .....H..                                                     | 180 |
| Okapi   | 121 | .....H..                                                     | 180 |
|         |     |                                                              |     |
| Cow     | 181 | PWHKECFLCSGCRKELCEEFFMSRDDYPFCLDCYNHLYAKKCAACTKPITGLRGAKFICF | 240 |
| Giraffe | 181 | .....                                                        | 240 |
| Okapi   | 181 | .....                                                        | 240 |
|         |     |                                                              |     |
| Cow     | 241 | QDRQWHSECFNCGKCSVSLVGEGLTHNKEIFCRKCGSGVDTDI                  | 284 |
| Giraffe | 241 | .G.....T.....S                                               | 284 |
| Okapi   | 241 | .....N.                                                      | 284 |

**Newick Tree of Mammalian FHL5**

((zebrafishhuman:0.0668376, chicken:0.0970388):0.0833155, (((alligatorse:0.00130397, alligatormi:0.00586458):0.0948263, falcon:0.119757):0.0262781, anolis:0.14137):0.0374446, (bushbaby:0.0559843, ((human:0.00409343, orangutan:0.0100917):0.00187668, (baboon:0.00174038, rhesus:0.00532684):0.0106608):0.0630953, ((rabbit:0.0456561, (rat:0.00305221, mouse:0.0183025):0.0516199):0.00325014, (manatee:0.0622959, (rhino:0.026086, (((panda:0, (walrus:0.0215425, weddelseal:0.0106662):0.00351075):0.00246469, dog:0.0154795):0.00385592, ((cat:0.00176367, tiger:0.00176367):0.030445, starmole:0.0408813):0.00568553):0.00277947, ((camel:0, alpaca:0.00361645):0.0241293, pig:0.0191361):0.00176541, (((orca:0.0102221, dolphin:0.0221023):0.0599355, baijidolphin:0.0442202):0.0211295, spermwhale:0.0271777):0.00250532, minkewhale:0.052086):0.0474888, (gerenuk:0.0186301, (sheep:0.000223805, (cow:0.00328827, yak:0.000239075):0.00330981):0.000484349, ((tibetanlp:0.00154523, goat:0.00198212):0.0021112, (giraffe:0.0159476, okapi:0.00533138):0.0068569):0.00128658):0.00283108):0.00758024):0.00718322):0.000834176):0.00163687):0.0104579):0.00716852):0.00999347):0.01381):0.143717):0.0833155);

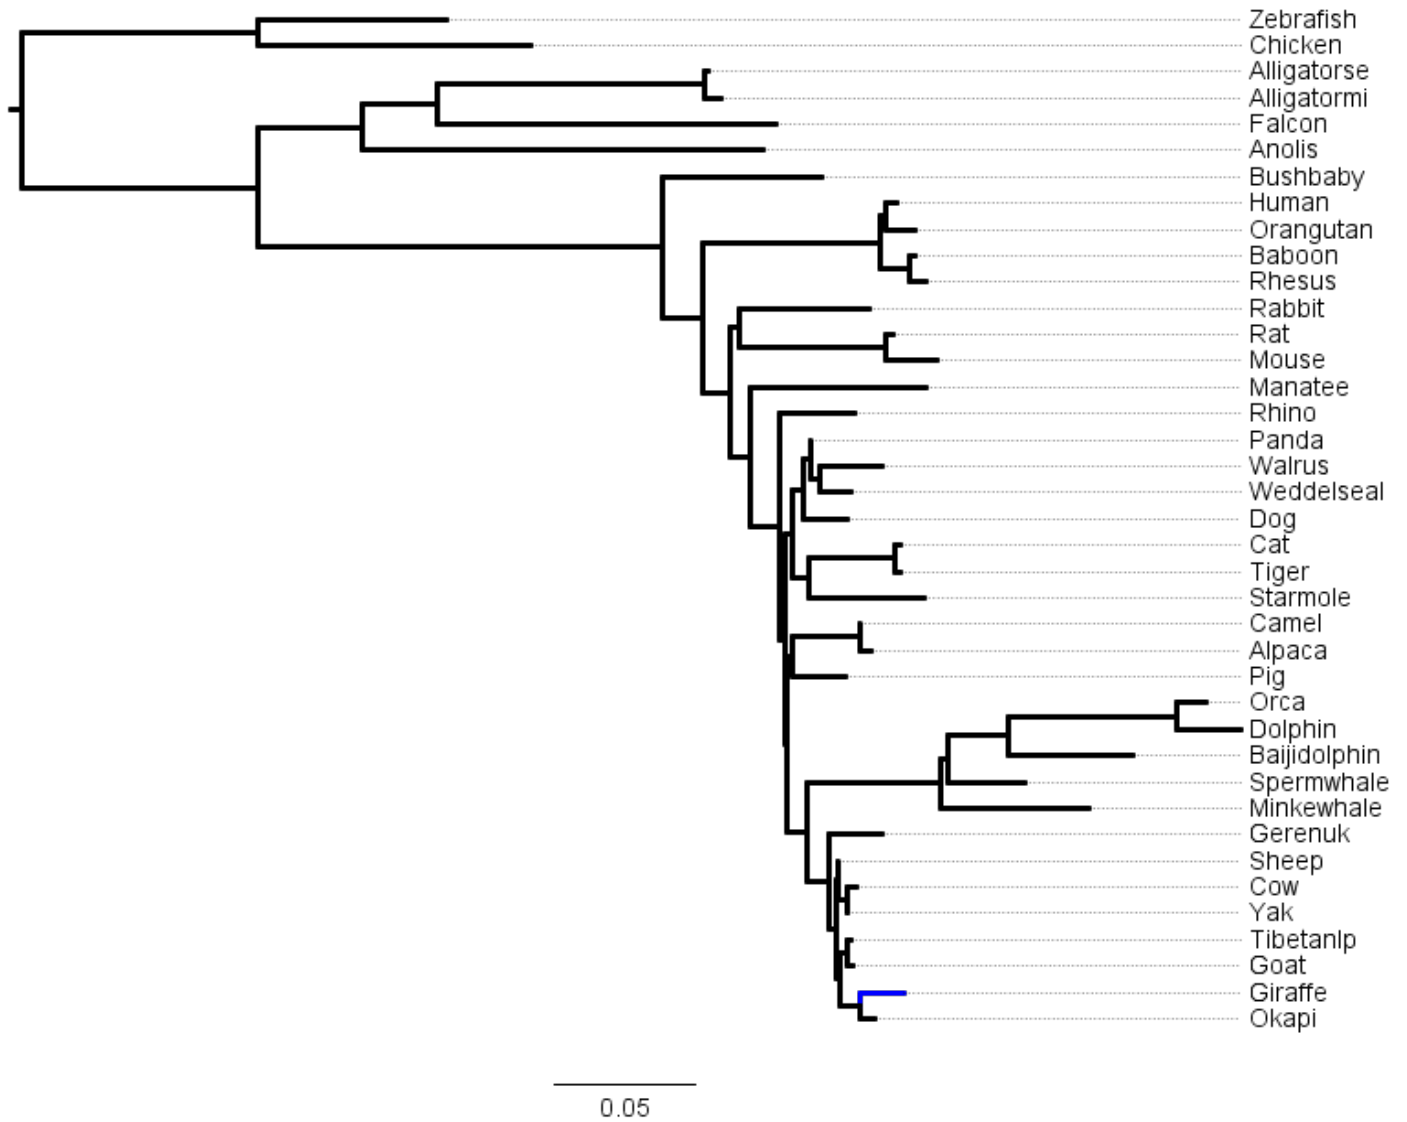

**Locus Name: Four And A Half LIM Domains 5 (FHL5)**

**Locus Name: Integrin alpha 10 (ITGA10)**

ENSBTAT00000011023 ITGA10-201 integrin alpha 10 heart, muscle articular cartilage  
 mouse: Homozygous null mice display slightly shortened long bones and mild abnormalities in  
 ephysiseal plate morphology.

PP2: Giraffe, N839D; Okapi, R821Q

Giraffe: A679T UIS, L755V UPS, N839D UIS, L942I UPS

Giraffe/Okapi: D116G UPS, G1053R UIS, K1078R UIS

**Protein sequence Alignment of Cow, Giraffe and Okapi ITGA10**

|         |     |                                                               |     |
|---------|-----|---------------------------------------------------------------|-----|
| Cow     | 1   | MEFPLIPHLFLPLMFLTLGLCSSFNLDVHRPRLFLGPPAEAFGYSVLQHVGGGRQWMLVGA | 60  |
| Giraffe | 1   | .....P.....R.....                                             | 60  |
| Okapi   | 1   | .....P.....R.....                                             | 60  |
| Cow     | 61  | PWDGPGSDRRGDVYRCLVGGSSHSAPCAKGHLDHPLGNSSRPVAVNMHLGMSLLETGNGG  | 120 |
| Giraffe | 61  | .....G....                                                    | 120 |
| Okapi   | 61  | .....Y.....G....                                              | 120 |
| Cow     | 121 | FMACAPLWSRACGSSVFSSGICARVDASFRPQGLAPTAQRCPTYMDVVIVLDGSNSIYP   | 180 |
| Giraffe | 121 | .....                                                         | 180 |
| Okapi   | 121 | .....H.....                                                   | 180 |
| Cow     | 181 | WSEVQTFLRRLVGRFLFIDPEQIQVGLVQYGESSVHEWSLGDFTKEEVVRAARNLSRREG  | 240 |
| Giraffe | 181 | .....                                                         | 240 |
| Okapi   | 181 | .....                                                         | 240 |
| Cow     | 241 | RETKTAQAIMMACTEGFSQSRGGRPEAARLLVVVTDGESHDGEELPTALQACEAGRVTRY  | 300 |
| Giraffe | 241 | .....                                                         | 300 |
| Okapi   | 241 | .....R.....                                                   | 300 |
| Cow     | 301 | GIAVLGHYLRQRDPSSFLREIRAIASDPDEKFFFNVTDEAALTDIVDALGDRIFGLEGS   | 360 |
| Giraffe | 301 | .....                                                         | 360 |
| Okapi   | 301 | .....T.....                                                   | 360 |
| Cow     | 361 | HGENESSFGLEMSQIGFSTHQLKDGILFGMVGAYDWGGSVLWLEEGRRLFPRTALEDEF   | 420 |
| Giraffe | 361 | .....                                                         | 420 |
| Okapi   | 361 | .....                                                         | 420 |
| Cow     | 421 | PPALQNHAAYLGYSVSSMFLRGRRFLSGAPRFSHRGKVIQFQKKGAVRVAQSLQGE      | 480 |
| Giraffe | 421 | .....R.....                                                   | 480 |
| Okapi   | 421 | .....R.....                                                   | 480 |
| Cow     | 481 | QIGSYFGSELCPDIDGDTTDVLLVAAPMFLGPQNKETGRVYVYLVGQPSLLTLQRTLQ    | 540 |
| Giraffe | 481 | .....                                                         | 540 |
| Okapi   | 481 | .....                                                         | 540 |
| Cow     | 541 | PESPQDARFGFAMGALPDLNQDGFADVAVGAPLEDGHRGALYLYHGAQRGVRPRPAQRIA  | 600 |
| Giraffe | 541 | .....H.....                                                   | 600 |
| Okapi   | 541 | .....H.....                                                   | 600 |
| Cow     | 601 | AVAMPQALSIFYGRSVDGRLDLDGDDLVDVAVGAQGAAILLSSRPVRLAPSLDVTTPPAIS | 660 |
| Giraffe | 601 | ..S.....V.....H.....                                          | 660 |
| Okapi   | 601 | ..S.....                                                      | 660 |
| Cow     | 661 | VVQRDCKRRGQEATCLSAALCFQVTSRTPGHWDRRFHVRFRTASLDEWTTAARAADFSGSQ | 720 |
| Giraffe | 661 | .....T.....R..H...LQ.....T..V.....                            | 720 |
| Okapi   | 661 | .....R.....Q.....                                             | 720 |
| Cow     | 721 | RLSPRRLRLSVGNITCEQLHFHVLDTSYLRPVSLSVTFALDNTTKPGPVLDEGSPTSIR   | 780 |
| Giraffe | 721 | .....N...V.....VT.....                                        | 780 |
| Okapi   | 721 | .....V.....T.....                                             | 780 |
| Cow     | 781 | KLVPFSKDCGPDNECVTDLVLQANMDIRGSRKDPFVVRGRRKVLVSATLENKKENAYNT   | 840 |
| Giraffe | 781 | .....D.....                                                   | 840 |
| Okapi   | 781 | .....Q.....                                                   | 840 |

|         |      |                                                                |      |
|---------|------|----------------------------------------------------------------|------|
| Cow     | 841  | SLSLNFSRNLHLSSFTPQSNSPVKVECAAPTPHTRLCSVGHVPVFTGAKVTFLLLEFEFSC  | 900  |
| Giraffe | 841  | ....S.....S..A.....M.....                                      | 900  |
| Okapi   | 841  | ....S.....S..A.....M.....                                      | 900  |
| Cow     | 901  | SFLLSQVLVRLTATSSSLERNGLRDNATAQTSAYIQYEPHLLFSSESTLHRYEVHPYGT    | 960  |
| Giraffe | 901  | .....I.....                                                    | 960  |
| Okapi   | 901  | .....I.....                                                    | 960  |
| Cow     | 961  | PVGPPEFKTTLRVQNLGCYVVSGLIVSALLPAVAYGGNYFLSLSQVITNNASCTVQNLT    | 1020 |
| Giraffe | 961  | .....I.....                                                    | 1020 |
| Okapi   | 961  | .....I.....                                                    | 1020 |
| Cow     | 1021 | EPPGPPVHPEELQHTSRLNESNTRCQVVRCHLGRRLAKGTEISVGLLRVLVHNEFFRRAKFK | 1080 |
| Giraffe | 1021 | .....H.....R.....R..                                           | 1080 |
| Okapi   | 1021 | .....H.....R.....R..                                           | 1080 |
| Cow     | 1081 | SLTVVSTFELSTEEGSVLLLTEASRWSESLLEVIQSRPVLISLWILIGSVLGLLLLLALL   | 1140 |
| Giraffe | 1081 | .....G.....H.....                                              | 1140 |
| Okapi   | 1081 | .....G.....                                                    | 1140 |
| Cow     | 1141 | VFCLWKLGF FARKKIPEEEKREDKLEQ                                   | 1167 |
| Giraffe | 1141 | .....E..E....                                                  | 1167 |
| Okapi   | 1141 | .....S...M....E..E....                                         | 1167 |

**Newick Tree of Mammalian ITGA10**

```
(Elephant:0.022716, (((Human:0.00371817, Orangutan:0.00402388):0.00461126,
Rhesus:0.0127369):0.0271021, (((Cat:0.000463002, Tiger:0.00297639):0.0253433,
Dog:0.0290155):0.000248483, Walrus:0.0262011):0.0137373, ((Rhino:0.0189875,
Horse:0.0194546):0.0122169, (Alpaca:0.00621601, Camel:0.0110714):0.0320862, ((Orca:0.00845164,
Minkewhale:0.0114551):0.0151917, (((Goat:0.00177715, Sheep:0.00423924):0.00173142,
Tibetantlp:0.00863256):0.00356924, (Cow:0.000848975, Yak:0.00344473):0.00214421,
Waterbuffalo:0.00302013):0.00556089):0.00324758, (Giraffe:0.0104911,
Okapi:0.00591051):0.00552424):0.0243155):0.00642702):0.00245339):0.00053918):0.00435728):0.022716
);
```



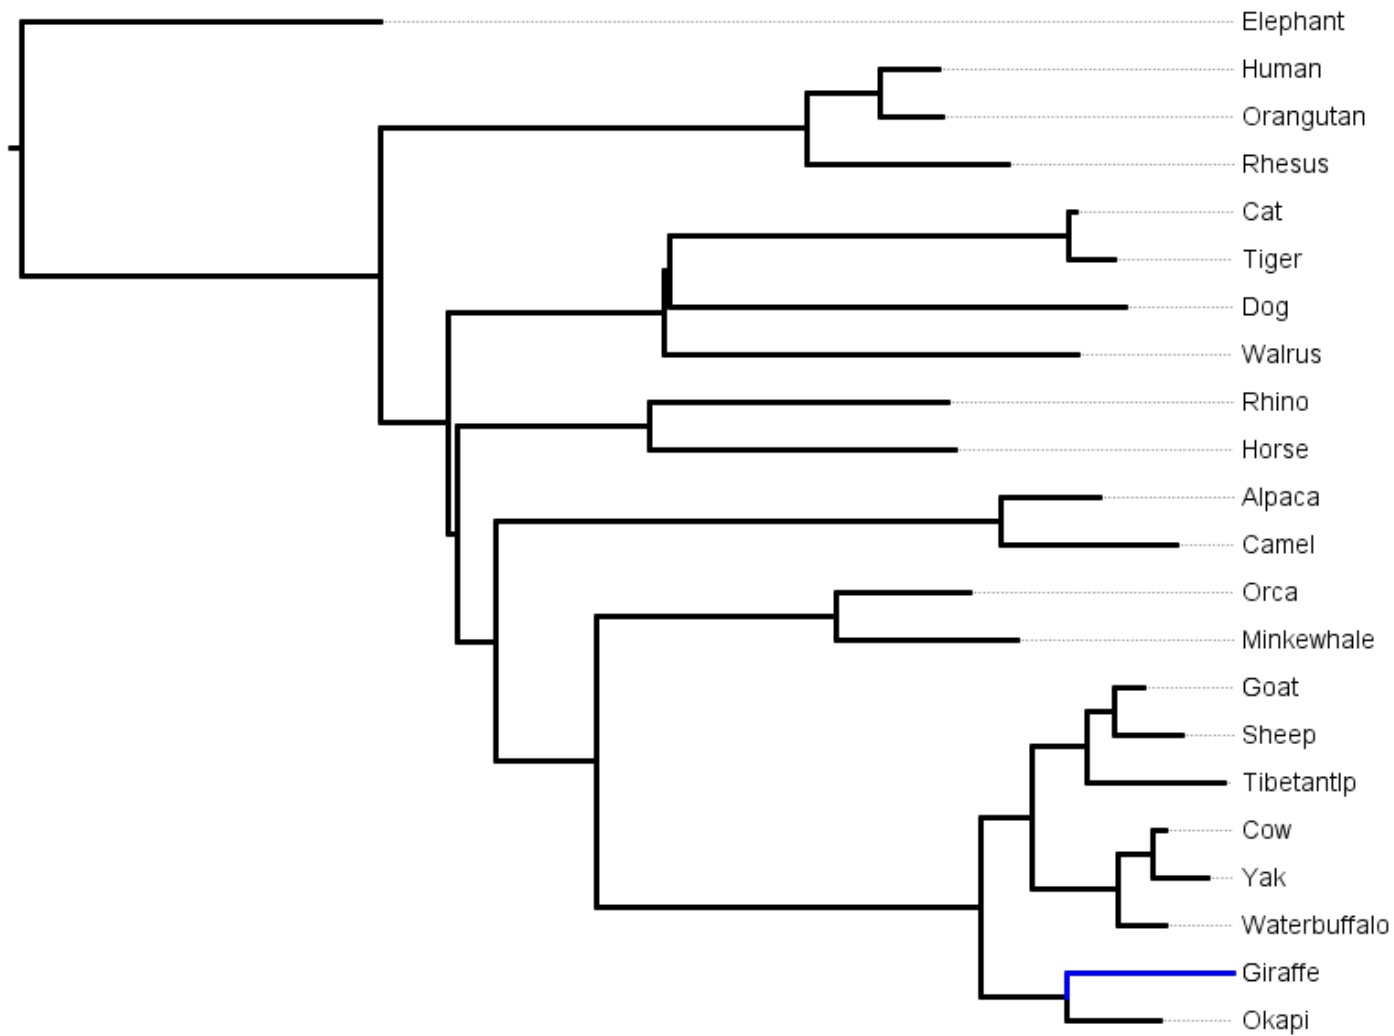

Locus Name: Integrin alpha 10 (ITGA10)

**Locus name:** Extracellular matrix protein 1 (**ECM1**)

ENSBTAT0000004959 ECM1-201 extracellular matrix protein endochondral bone formation and angiogenesis human: Lipoid proteinosis (LiP) [MIMOUSE:247100]: Rare autosomal recessive disorder characterized by generalized thickening of skin, mucosae and certain viscera. human height SNP

PP2: (Giraffe) V41M, S63F, T227M; (Giraffe/Okapitty) A15I, G161V

Giraffe: A7V UIS, V45M UPS, S67F UPS, S141N UPS, A230M UPS, T417A UPS

Giraffe/Okapi: T15I UPS, E78K UIS, I88V UPS, K104N UPS, G164V UIS, T245A UPS, Q339K UPS

\*\*Water buffalo used instead of Cow because cow sequence incomplete.

**Protein sequence Alignment of Water Buffalo, Giraffe and Okapi ECM1**

|               |     |                |              |            |             |         |         |           |         |           |       |       |       |        |        |     |
|---------------|-----|----------------|--------------|------------|-------------|---------|---------|-----------|---------|-----------|-------|-------|-------|--------|--------|-----|
| Water Buffalo | 1   | MGTMSGAAVLVLA  | CLTVASV      | ASDRGFK    | APGQREL     | GQPPLTH | PLQEVGY | AAPPSP    | PLSRALP | 60        |       |       |       |        |        |     |
| Giraffe       | 1   | .....V.....    | I.....G...   | S.....E... | Y....M..... | A....   |         |           |         | 60        |       |       |       |        |        |     |
| Okapi         | 1   | .....I.....    | G.....S..... | E...Y..... | A....       |         |         |           |         | 60        |       |       |       |        |        |     |
| Water Buffalo | 61  | QGHPRTSQHSL    | HFEQG        | SEVQAS     | PSQDAI      | PLQEEL  | PAPQL   | PVEKKG    | GPPLQ   | EAIPLQEEL | 120   |       |       |        |        |     |
| Giraffe       | 61  | ....D.F.....   | ..RK.....    | E.V.....   | LP.....     | N.....  |         |           |         | 120       |       |       |       |        |        |     |
| Okapi         | 61  | ....D.....     | ..RK.....    | E.V.....   | LP.....     | N.....  |         |           |         | 120       |       |       |       |        |        |     |
| Water Buffalo | 121 | PPPQVPIEQ      | KEEKP        | PAPSM      | DHSPPE      | PEPE    | SWNPA   | QHCQQ     | GRPRR   | GWGHR     | LDGFP | GRPS  | LDNL  | 180    |        |     |
| Giraffe       | 121 | .....N.N.....  |              |            |             |         |         | GS.V..... |         |           |       |       |       | 180    |        |     |
| Okapi         | 121 | .....N.....    |              |            |             |         |         | GS.V..... |         |           |       |       |       | 180    |        |     |
| Water Buffalo | 181 | DQICLPSRQ      | HVVY         | GPWN       | LFPQT       | GFSH    | LSRQ    | GETL      | NLLET   | GYRCC     | RCRNR | ANRL  | DCAE  | LWV    | 240    |     |
| Giraffe       | 181 | .....H.PM..... |              |            |             |         |         |           |         |           |       |       |       | 240    |        |     |
| Okapi         | 181 | .....H.PT..... |              |            |             |         |         |           |         |           |       |       |       | 240    |        |     |
| Water Buffalo | 241 | EDAVTRFCE      | AEFV         | KTQ        | PHGCC       | KKQ     | GEAR    | LSCF      | QEEA    | PRPHY     | QLRAC | PSHQ  | PGIS  | LGPEL  | 300    |     |
| Giraffe       | 241 | ....A.....     |              |            |             |         |         |           |         |           |       |       |       | 300    |        |     |
| Okapi         | 241 | ....A.....     |              |            |             |         |         |           |         |           |       |       |       | 300    |        |     |
| Water Buffalo | 301 | PFPPGLPT       | VDNIK        | NICH       | LKRFR       | SVPR    | NLPAT   | DSIQ      | RQLQ    | ALTR      | LEAE  | FQRCC | RQGN  | NHTC   | 360    |     |
| Giraffe       | 301 | .....K.....    |              |            |             |         |         |           |         |           |       |       |       | 360    |        |     |
| Okapi         | 301 | .....K.....    |              |            |             |         |         |           |         |           |       |       |       | 360    |        |     |
| Water Buffalo | 361 | TWKAWED        | TLDG         | YCD        | WEQAI       | KTHH    | HSCCN   | YPPS      | PLR     | DECF      | ARRA  | PYPN  | YDRD  | ILTL   | DLRSI  | 420 |
| Giraffe       | 361 | .....R.....    |              |            |             |         |         |           |         |           |       |       |       |        |        | 420 |
| Okapi         | 361 | .....R.....    |              |            |             |         |         |           |         |           |       |       |       |        |        | 420 |
| Water Buffalo | 421 | TPNLMN         | HLCG         | NRRV       | LSKHK       | QIPG    | LIQK    | VTAR      | CCDL    | PFPE      | QACCA | EEKSA | FIDEL | CGSRR  | 480    |     |
| Giraffe       | 421 | .....S.....    |              |            |             |         |         |           |         |           |       |       |       | D..... | 480    |     |
| Okapi         | 421 | .....Q.....    |              |            |             |         |         |           |         |           |       |       |       | D..... | 480    |     |
| Water Buffalo | 481 | NFWRDS         | ALCCK        | LSPG       | DEQIN       | CFNT    | KYLR    | NVAL      | VTGD    | TRDA      | KGPRE | QGP   | TQGT  | NSSPT  | SEP    | 540 |
| Giraffe       | 481 | .....N.....    |              |            |             |         |         |           |         |           |       |       |       | A..... | G..... | 540 |
| Okapi         | 481 | .....N.....    |              |            |             |         |         |           |         |           |       |       |       | G..... |        | 540 |
| Water Buffalo | 541 | KEE            | 543          |            |             |         |         |           |         |           |       |       |       |        |        |     |
| Giraffe       | 541 | ...            | 543          |            |             |         |         |           |         |           |       |       |       |        |        |     |
| Okapi         | 541 | ...            | 543          |            |             |         |         |           |         |           |       |       |       |        |        |     |

**Newick Tree of Mammalian ECM1**

(elephant:0.0750334, (((((human:0.0167993, orangutan:0.0113753):0.00957764, (macaque:0.0096667, baboon:0.0092029):0.027333):0.091352, lemur:0.107534):0.0199236, (((((Ailuropoda melanoleuca:0.00571839, polar\_bear:0.0148253):0.0290693, (walrus:0.0392861, Weddell\_seal:0.0414904):0.0078879):0.00731417, dog:0.0831403):0.0098806, (cat:0.00947357, tiger:0.00486409):0.0835722):0.0220459, ((camel:0.00519368, alpaca:0.00591778):0.0387242, ((sperm\_whale:0.0414087, (minke\_whale:0.0337845, (Chinese\_dolphin:0.0201641, (orca:0.00563662, bottle\_nose\_dolphin:0.0092065):0.00995856):0.0111664):0.00183346):0.0469186, ((tibetan\_antelope:0.00979868, goat:0.0111361):0.0101703, (yak:0.0136206, water\_buffalo:0.0125033):0.00962957):0.00562099, (giraffe:0.0135262, okapi:0.0013169):0.0247143):0.066024):0.00660271):0.0157028):0.0183566):0.0750334);

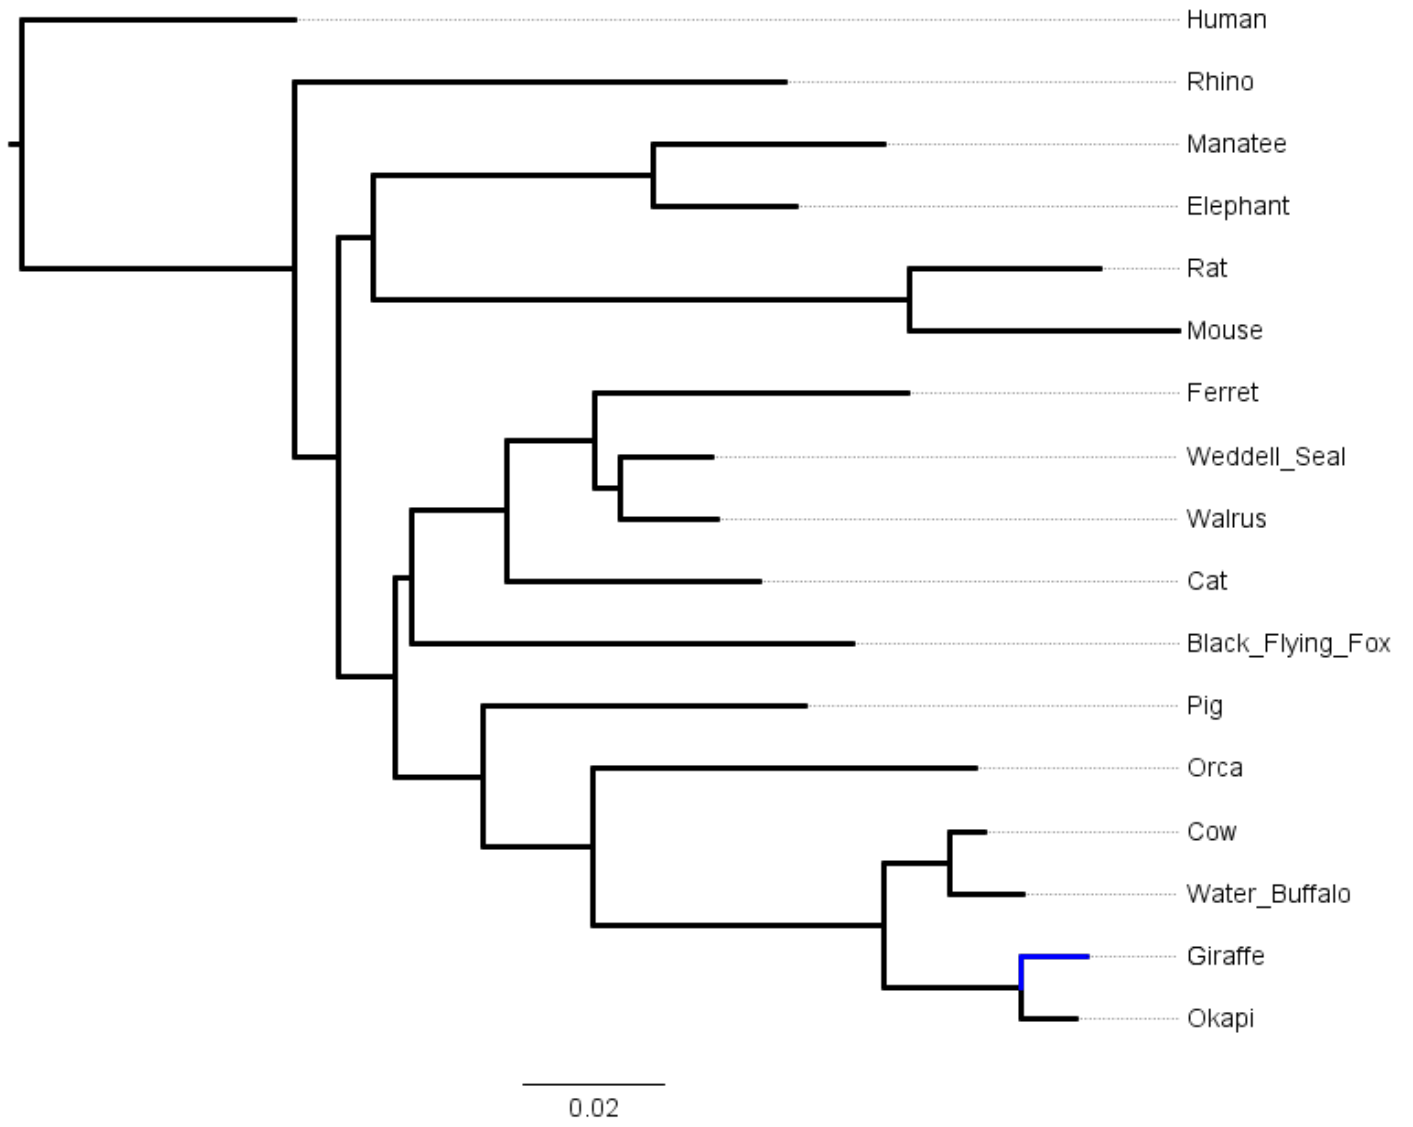

**Locus name:** Extracellular matrix protein 1 (**ECM1**)

**Locus Name:** Tweety family member 2 (**TTYH2**)

ENSBTAT0000014618 TTYH2-201 chloride channel growth control, development  
no mutants described for mouse or human; Drosophila mutants are flightless

PP2: (Giraffe) D38N; (Giraffe/Okapi) G384S  
PSG: (Giraffe) K414R  
Giraffe: D38N UIS, K414R UIS  
Giraffe/Okapi: V105A UPS, G384S UIS, H521R UPS

**Protein sequence Alignment of Cow, Giraffe and Okapi TTYH2**

|         |     |                                                                |     |
|---------|-----|----------------------------------------------------------------|-----|
| Cow     | 1   | MPAARVEYIAPWVWVWLHSVPHLGLRLQFVDSTFRPRDESYQESLLFLGLVAAVGLGLLV   | 60  |
| Giraffe | 1   | .....N.....                                                    | 60  |
| Okapi   | 1   | .....                                                          | 60  |
|         |     |                                                                |     |
| Cow     | 61  | LLAAYLVCVCCCRQDDAVQTKRPRSCCVTWTAVVAALICCAAVGVGFYGNSEANDGVYQL   | 120 |
| Giraffe | 61  | ..V.....G.....A.....                                           | 120 |
| Okapi   | 61  | ..T.....G.....A.....                                           | 120 |
|         |     |                                                                |     |
| Cow     | 121 | LYALDNNANHTFSGIDVLVSGTTQKMKVDLEQHLARLGEIFATRGDYLTQTLKFLQQTAGSI | 180 |
| Giraffe | 121 | .....E.....A.....                                              | 180 |
| Okapi   | 121 | .....R..E.....A.....M.....                                     | 180 |
|         |     |                                                                |     |
| Cow     | 181 | IAQIAGVPVWTEVTEELTELANQTSSVEYYRWLSYLLLFVLDLVLCLLACLGLAKRSRCL   | 240 |
| Giraffe | 181 | .V.M...T.....F.....                                            | 240 |
| Okapi   | 181 | .V.M...T.....Y...F.....                                        | 240 |
|         |     |                                                                |     |
| Cow     | 241 | LASMLCCGVLALLFSWTSLAADAAAAGVTSDFCAAPDTFILNITEGQVRPEVTQYYLYCS   | 300 |
| Giraffe | 241 | .....A....L.....R.....                                         | 300 |
| Okapi   | 241 | .....A....L.....R.....                                         | 300 |
|         |     |                                                                |     |
| Cow     | 301 | QSASSPFQQALTVFQSRSLTAMQIQVAGLQFAVPRFPTAEKDLLGIQLLLNSSESGLHQL   | 360 |
| Giraffe | 301 | .....T.....                                                    | 360 |
| Okapi   | 301 | .....I.....T.....                                              | 360 |
|         |     |                                                                |     |
| Cow     | 361 | TALLDCRGLHKDYLDALAGICYDGLEGLLYLGLFSLLAALAFSIMICLGPAAWKHCATRD   | 420 |
| Giraffe | 361 | .....S.....S.....R...S..                                       | 420 |
| Okapi   | 361 | .....S.....                                                    | 420 |
|         |     |                                                                |     |
| Cow     | 421 | RDYDDIDDDDPFNPQARRIATHNPPRGQLRSFCSYSSGLGSQGLHPAQTISNAPVSEYM    | 480 |
| Giraffe | 421 | .....A.....T.....                                              | 480 |
| Okapi   | 421 | .....A.....T.....                                              | 480 |
|         |     |                                                                |     |
| Cow     | 481 | NQAALFGGNPRYENVPLIGRGSPPPTYSPSMRATYLSVADEHLRHYGNEFPG           | 533 |
| Giraffe | 481 | .....R.....                                                    | 533 |
| Okapi   | 481 | .....R.....                                                    | 533 |

**Newick Tree of Mammalian TTYH2**

(Human:0.0382285, (Rhino:0.0688808, ((Manatee:0.0323078, Elephant:0.0200028):0.0393509, (Rat:0.026561, Mouse:0.0375202):0.075332):0.00474799, (((Ferret:0.043937, (Weddell\_Seal:0.0128347, Walrus:0.0137355):0.00361613):0.0122243, Cat:0.0354042):0.0132597, Black\_Flying\_Fox:0.0616557):0.00252206, (Pig:0.0451661, (Orca:0.0538598, (Giraffe:0.00924067, Okapi:0.00778989):0.0190247, (Cow:0.00494582, Water\_Buffalo:0.0102066):0.0090632):0.0410263):0.0153503):0.0123817):0.00775085):0.0063642):0.0382285);

**Locus Name:** Tweety family member 2 (**TTYH2**)

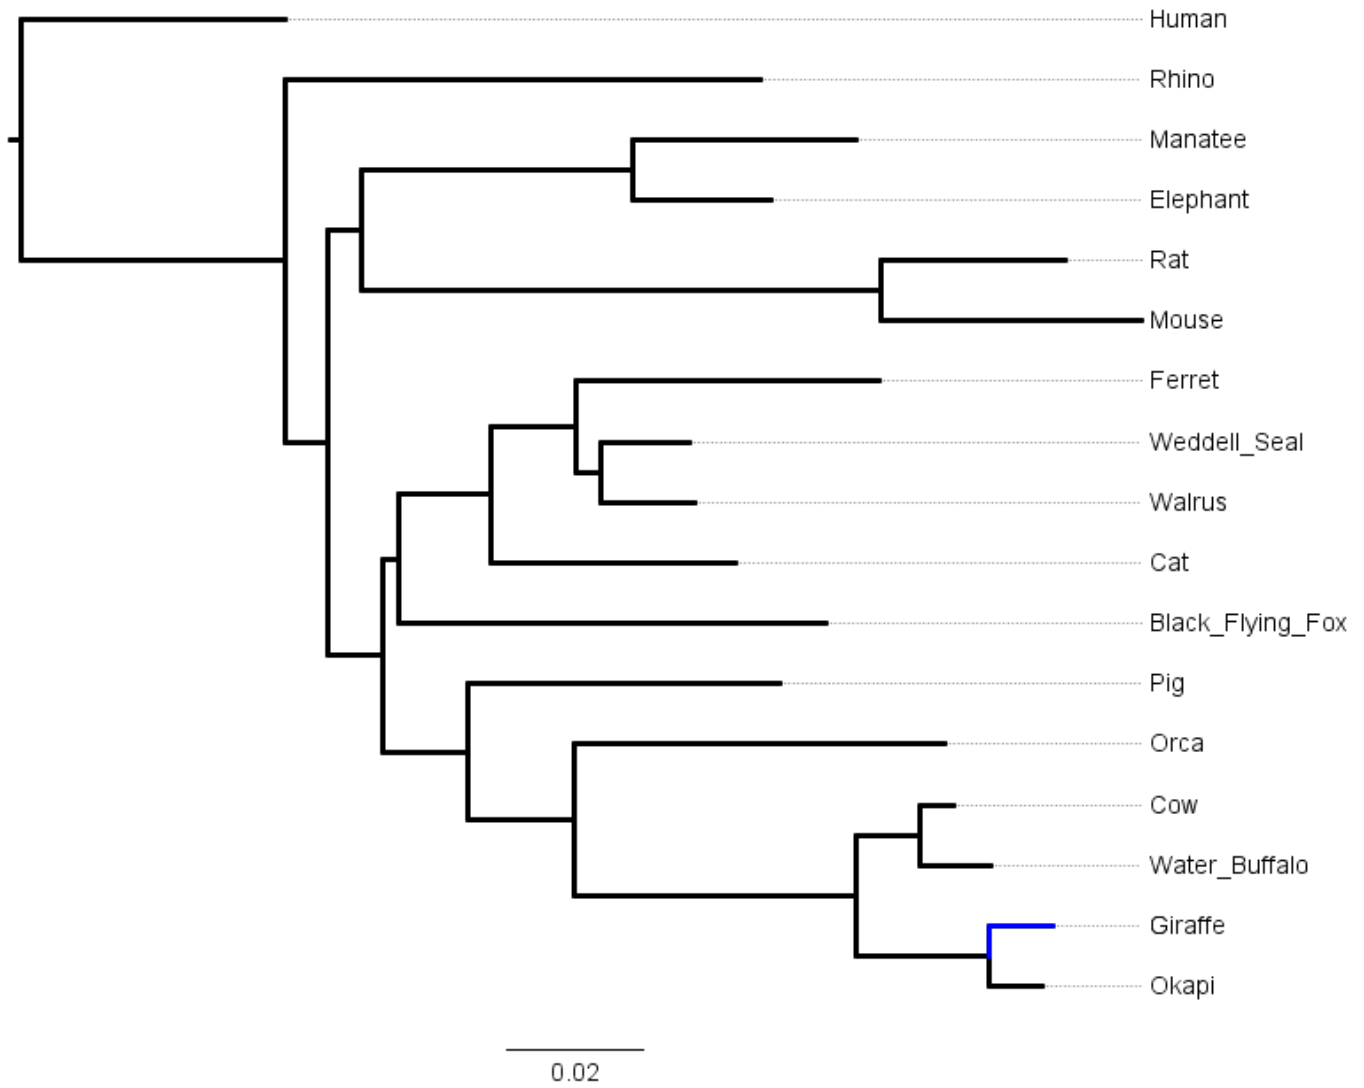

**Locus Name:** Tweety family member 2 (**TTYH2**)

**Locus Name: CREB Binding Protein (CREBBP)**

ENSBTAT00000005092 CREBBP-201 CBP histone acetylase angiogenesis, skeletal growth, regulates Hox protein activity human: Rubinstein-Taybi syndrome 1 (RSTS1) [MIMOUSE:180849]: A disorder characterized by craniofacial abnormalities, postnatal growth deficiency, broad thumbs, broad big toes, mental retardation and a propensity for development of malignancies.

PP2: Giraffe, A130T, G2171S; Giraffe/Okapi, A2268G

Giraffe: A259T UIS, T859P UIS, A1022V UPS, G2165S UIS

Giraffe/Okapi: PG2073-2074AS UISS, A2258G UIS

**Protein sequence Alignment of Cow, Giraffe and Okapi CREBBP**

|         |     |                                                                |     |
|---------|-----|----------------------------------------------------------------|-----|
| Cow     | 1   | MAENLLDGPPNPKRAKLSSPGFSANDSTDFGSLFDLENDLPDELIPNGGELSLLNSGNLV   | 60  |
| Giraffe | 1   | .....                                                          | 60  |
| Okapi   | 1   | .....                                                          | 60  |
| Cow     | 61  | PDAASKHKQLSELLRGGSSSSINPGIGNVSASSPAQQGLGSQAQQQPSSANMASLGAMGK   | 120 |
| Giraffe | 61  | .....G.....                                                    | 120 |
| Okapi   | 61  | .....G.....                                                    | 120 |
| Cow     | 121 | SPLNQGDSSAPSLPKQAASTSGPTPPASQALNPQAQKQVGLVTSSPATSQTGPGICMNAN   | 180 |
| Giraffe | 121 | .....T.....                                                    | 180 |
| Okapi   | 121 | .....                                                          | 180 |
| Cow     | 181 | FNQTHPGLLNSNSGHGLMNQAQQGQAQVMNGSLGAAGRGRGAGMPYPTPAMQGATSSVLA   | 240 |
| Giraffe | 181 | ..A.....S.....A.....                                           | 240 |
| Okapi   | 181 | .....S.....T.....                                              | 240 |
| Cow     | 241 | ETLTQVSPQMASHAGLNTAQAGGMSKMGMTGNTSPFGQPFSSQTGGQQMGAPGVNPQLPSK  | 300 |
| Giraffe | 241 | .....S.....                                                    | 300 |
| Okapi   | 241 | .....                                                          | 300 |
| Cow     | 301 | QSMVNSLPPFAADIKNASVTNVPNMPQMOTSVGIVPTQAIATGPTADPEKRKLIQQQLVL   | 360 |
| Giraffe | 301 | .....A..T.....S.....                                           | 360 |
| Okapi   | 301 | .....A..T.....S.....                                           | 360 |
| Cow     | 361 | LLHAHKCQRREQANGEVRACALPHCRTMKNVNLNMTHTCQAGKACQVAHCASSRQIIISHWK | 420 |
| Giraffe | 361 | .....S.....                                                    | 420 |
| Okapi   | 361 | .....S.....                                                    | 420 |
| Cow     | 421 | NCTRHDCPVCLPLKNASDKRNQQTILGSPAGGIQNTIGSVGTGQQNATSLSNPNPIDPSS   | 480 |
| Giraffe | 421 | .....S.....                                                    | 480 |
| Okapi   | 421 | .....S.....                                                    | 480 |
| Cow     | 481 | MQRAYAALGLPYLNQPQTQLQPQVPGQQAQPQTHQQMRSNLNPLGNPNMNI PAGGITTDQ  | 540 |
| Giraffe | 481 | .....                                                          | 540 |
| Okapi   | 481 | .....                                                          | 540 |
| Cow     | 541 | QPSNLISESALPTSLGATNPLMNDGNSNGNIGTLSTIPAAAPPSSTGVRKSWHEHVTQDL   | 600 |
| Giraffe | 541 | ..P.....                                                       | 600 |
| Okapi   | 541 | ..P.....                                                       | 600 |
| Cow     | 601 | RSHLVHKLQVAIFPTPDPAALKDRR MENLVAYAKKVEGDMYESANSRDEYYHLLAEKIYK  | 660 |
| Giraffe | 601 | .....                                                          | 660 |
| Okapi   | 601 | .....                                                          | 660 |
| Cow     | 661 | IQKELEEKRRSRLHKQGILGNQPALSAPGTQPPGIPQAQFVRPPNGPMLPTVNRMQVSQG   | 720 |
| Giraffe | 661 | .....P.....S.....P.....                                        | 720 |
| Okapi   | 661 | .....P.....S.....P.....                                        | 720 |
| Cow     | 721 | MNSFNPISLGNVQLPQAPMG PRAASPMNHSVPMNSMGVPGMAISPSRMPQPPNMMGAHA   | 780 |
| Giraffe | 721 | .....L...T                                                     | 780 |
| Okapi   | 721 | .....L.....                                                    | 780 |
| Cow     | 781 | NSMMAQAPASQFLPQSQFPSSSGALS VSSVGMGQPAAQAGVPQGQVPGAALPNPLNMLG   | 840 |
| Giraffe | 781 | .....                                                          | 840 |

|         |      |                                                               |      |
|---------|------|---------------------------------------------------------------|------|
| Okapi   | 781  | .....T.....                                                   | 840  |
| Cow     | 841  | PQASQLPCPFVTQPPLHQTPPPASTAAGMPSLQHHPAAGVTPPQPAAPTQPSTPASSSSGQ | 900  |
| Giraffe | 841  | .....P.....                                                   | 900  |
| Okapi   | 841  | .....                                                         | 900  |
| Cow     | 901  | TPTPTPGSVPSASQTQSTPTVQAAAQAQVTPQPQTPVQPPSVATPQSSQQQPTPVHTQPP  | 960  |
| Giraffe | 901  | .....                                                         | 960  |
| Okapi   | 901  | .....                                                         | 960  |
| Cow     | 961  | GTPLSQTAASIDNRVPTPSSVASAETNSQQPGPEVPLEMKAEIKTEDTEPDAGEPKGEP   | 1020 |
| Giraffe | 961  | .....T.....                                                   | 1020 |
| Okapi   | 961  | .....                                                         | 1020 |
| Cow     | 1021 | GATMMEEDLQGSSQVKEETDPTEQKSEPMEVDEKKTEVKVEAKEEEEEGSTNGTASQSTSP | 1080 |
| Giraffe | 1021 | .VA.....                                                      | 1080 |
| Okapi   | 1021 | .VA.....                                                      | 1080 |
| Cow     | 1081 | SQPRKKIFKPEELRQALMSTLEALYRQDPESLPPFRQVDPQLLGIPTYFDIVKNPMDLST  | 1140 |
| Giraffe | 1081 | .....P.....                                                   | 1140 |
| Okapi   | 1081 | .....P.....                                                   | 1140 |
| Cow     | 1141 | IKRKLDTGQYQEPWQYVDDVWLMFNNAWLYNRKTSRVYKFCSKLAEVFEQEIDPVMQSLG  | 1200 |
| Giraffe | 1141 | .....                                                         | 1200 |
| Okapi   | 1141 | .....                                                         | 1200 |
| Cow     | 1201 | YCCGRKYEFSPQTLCCYKQLCTIPRDAAYYSYQNRVYHFCEKCFTEIQGENVTLGDDPSQ  | 1260 |
| Giraffe | 1201 | .....                                                         | 1260 |
| Okapi   | 1201 | .....                                                         | 1260 |
| Cow     | 1261 | PQTTISKDQFEKKNNDTLDPEPFVDCKECGRKMHQICVLHYDIIWPSGFVCDNCLKKTGR  | 1320 |
| Giraffe | 1261 | .....                                                         | 1320 |
| Okapi   | 1261 | .....                                                         | 1320 |
| Cow     | 1321 | TRKENKFSAKRLQTTRLGNHLEDRVNKFLLRRQNHPEAGEVFVRRVASSDKTVEVKPGMKS | 1380 |
| Giraffe | 1321 | .....                                                         | 1380 |
| Okapi   | 1321 | .....                                                         | 1380 |
| Cow     | 1381 | RFVDSGEMSESFYRKTALFAFEEIDGVDVCFGMHVQEYGSDCPPNTRRVYISYLDSE     | 1440 |
| Giraffe | 1381 | .....                                                         | 1440 |
| Okapi   | 1381 | .....                                                         | 1440 |
| Cow     | 1441 | HFFRPRCLRTAVYHEILIGYLEYVKLGYVTGHIWACPPSEGDDYIFHCHPPDQKIPKPK   | 1500 |
| Giraffe | 1441 | .....                                                         | 1500 |
| Okapi   | 1441 | .....                                                         | 1500 |
| Cow     | 1501 | RLQEWYKMLDKAFAERI IHDYKDILKQANEDRLTSAKELPYFEGDFWPNVLEESIKELE  | 1560 |
| Giraffe | 1501 | .....T.....                                                   | 1560 |
| Okapi   | 1501 | .....T.....                                                   | 1560 |
| Cow     | 1561 | QEEEEKKEESTAASETTEGSQGDSKNAKKNNKKTNKNKSSISRTNKKKPSMPNVSNDL    | 1620 |
| Giraffe | 1561 | .....A.....                                                   | 1620 |
| Okapi   | 1561 | .....A.....                                                   | 1620 |
| Cow     | 1621 | SQKLYATMEKHKEVFFVIHLHAGPVIHTLPPIVDPDPLLSCDLMDGRDAFLT LARDKHWE | 1680 |
| Giraffe | 1621 | .....N.....                                                   | 1680 |
| Okapi   | 1621 | .....N.....                                                   | 1680 |
| Cow     | 1681 | FSSLRRSKWSTLCLMVELHTQGQDRFVYTCNECKHHVETRWHCTVCEDYDLCINCYNTKS  | 1740 |
| Giraffe | 1681 | .....                                                         | 1740 |
| Okapi   | 1681 | .....                                                         | 1740 |
| Cow     | 1741 | HTHKMVKWGLGLDDEGGSQGEPPQSKSPQESRRLSIQRCIQSLVHACQCRNANCSLPSCQK | 1800 |
| Giraffe | 1741 | .....                                                         | 1800 |
| Okapi   | 1741 | .....                                                         | 1800 |
| Cow     | 1801 | MKRVVQHTKGCKRKTNGGCPVCKQLIALCCYHAKHCQENKCPVPFCLNIKHKLRQQQIQH  | 1860 |
| Giraffe | 1801 | .....                                                         | 1860 |
| Okapi   | 1801 | .....                                                         | 1860 |

|         |      |                                                              |      |
|---------|------|--------------------------------------------------------------|------|
| Cow     | 1861 | RLQQAQLMRRRMATMNRNVPQQSLPSPTSAPPGTPTQQPSTPQTPQPPAQPPSPVMS    | 1920 |
| Giraffe | 1861 | .....                                                        | 1920 |
| Okapi   | 1861 | .....                                                        | 1920 |
| Cow     | 1921 | PAGFPSVARTQPPTTVSTGKPTNQVPAPPPPAQPPAAVEAARQIEREAQQQQLYRVNI   | 1980 |
| Giraffe | 1921 | .....                                                        | 1980 |
| Okapi   | 1921 | .....                                                        | 1980 |
| Cow     | 1981 | NNGMPPGRTGMVTPVVSQMAPVGLNVP RPQVSGPVVPTLPAGQWQAPIPQQQPMPGMFR | 2040 |
| Giraffe | 1981 | .....                                                        | 2040 |
| Okapi   | 1981 | .....                                                        | 2040 |
| Cow     | 2041 | PVMSMQAQPAVAGPRMSGVQPPRSISPGALQDLLRTLKSPSSPQQQQVLNILKSNPQLM  | 2100 |
| Giraffe | 2041 | .....                                                        | 2100 |
| Okapi   | 2041 | .....                                                        | 2100 |
| Cow     | 2101 | AAFIKQRTAKYVASQPLQPPGLQAQPLHQPLQNLNAMQASGPRPGVPPQQQAMGG      | 2160 |
| Giraffe | 2101 | .....S.....G.....S                                           | 2160 |
| Okapi   | 2101 | .....S.....G.....                                            | 2160 |
| Cow     | 2161 | LNPQGGALNIMNPGHNPSMASMNPQYREMLRRQLLQQQQQQQQQQQQGSGMAGGMA     | 2220 |
| Giraffe | 2161 | ...S.....AS.....-.....G.....                                 | 2219 |
| Okapi   | 2161 | .....AS.....-.....G.....                                     | 2216 |
| Cow     | 2221 | GHSQFQQPPGAGYPPAMPQQRMQQHLPMQGSAMGPMMAQMGQLGQMGQPGLGADSTPNI  | 2280 |
| Giraffe | 2220 | ..G.....G.....                                               | 2279 |
| Okapi   | 2217 | ..G.....T.....G.....                                         | 2276 |
| Cow     | 2281 | QQALQQRILQQQQMKQQMGSPGQPNPMSPPQHMLSGQPQASHLPGQQMATSLSSQVRSFA | 2340 |
| Giraffe | 2280 | .....                                                        | 2339 |
| Okapi   | 2277 | .....                                                        | 2336 |
| Cow     | 2341 | PVQSPRPQSQPPHSSPSPRIQPQPSPHHVSPQTGSPHPGLAVTMASSIDQGHLGNPEQSA | 2400 |
| Giraffe | 2340 | .....                                                        | 2399 |
| Okapi   | 2337 | .....                                                        | 2396 |
| Cow     | 2401 | MLPQLNTPNRSALSSELSLVGDTTGTLEKFEVGL                           | 2435 |
| Giraffe | 2400 | .....                                                        | 2434 |
| Okapi   | 2397 | .....                                                        | 2431 |

**Newick Tree of Mammalian CREBBP**

```
((mouse:0.0054413, rat:0.00609596):0.00984197, (((rhesus_monkey:0.00251445, (human:0.00218422,
orangutan:0.0118545):0.000778584):0.00922866, bushbaby:0.0162716):0.00335433, ((dog:0.00854825,
polecat:0.00905969, walrus:0.00584797):0.0017997):0.00653838, ((alpaca:0.0094531,
rhino:0.00897713, horse:0.0142625):0.00214399):0.00166158, (((orca:0.0029489,
sperm_whale:0.0039329):0.000244742, minke_whale:0.00283622):0.00837558,
((water_buffalo:0.00153525, cow:0.00257999):0.00379528, (giraffe:0.00365283,
okapi:0.00129566):0.00387512):0.0139488):0.00191949):0.00123868):0.0106762):0.00984197);
```



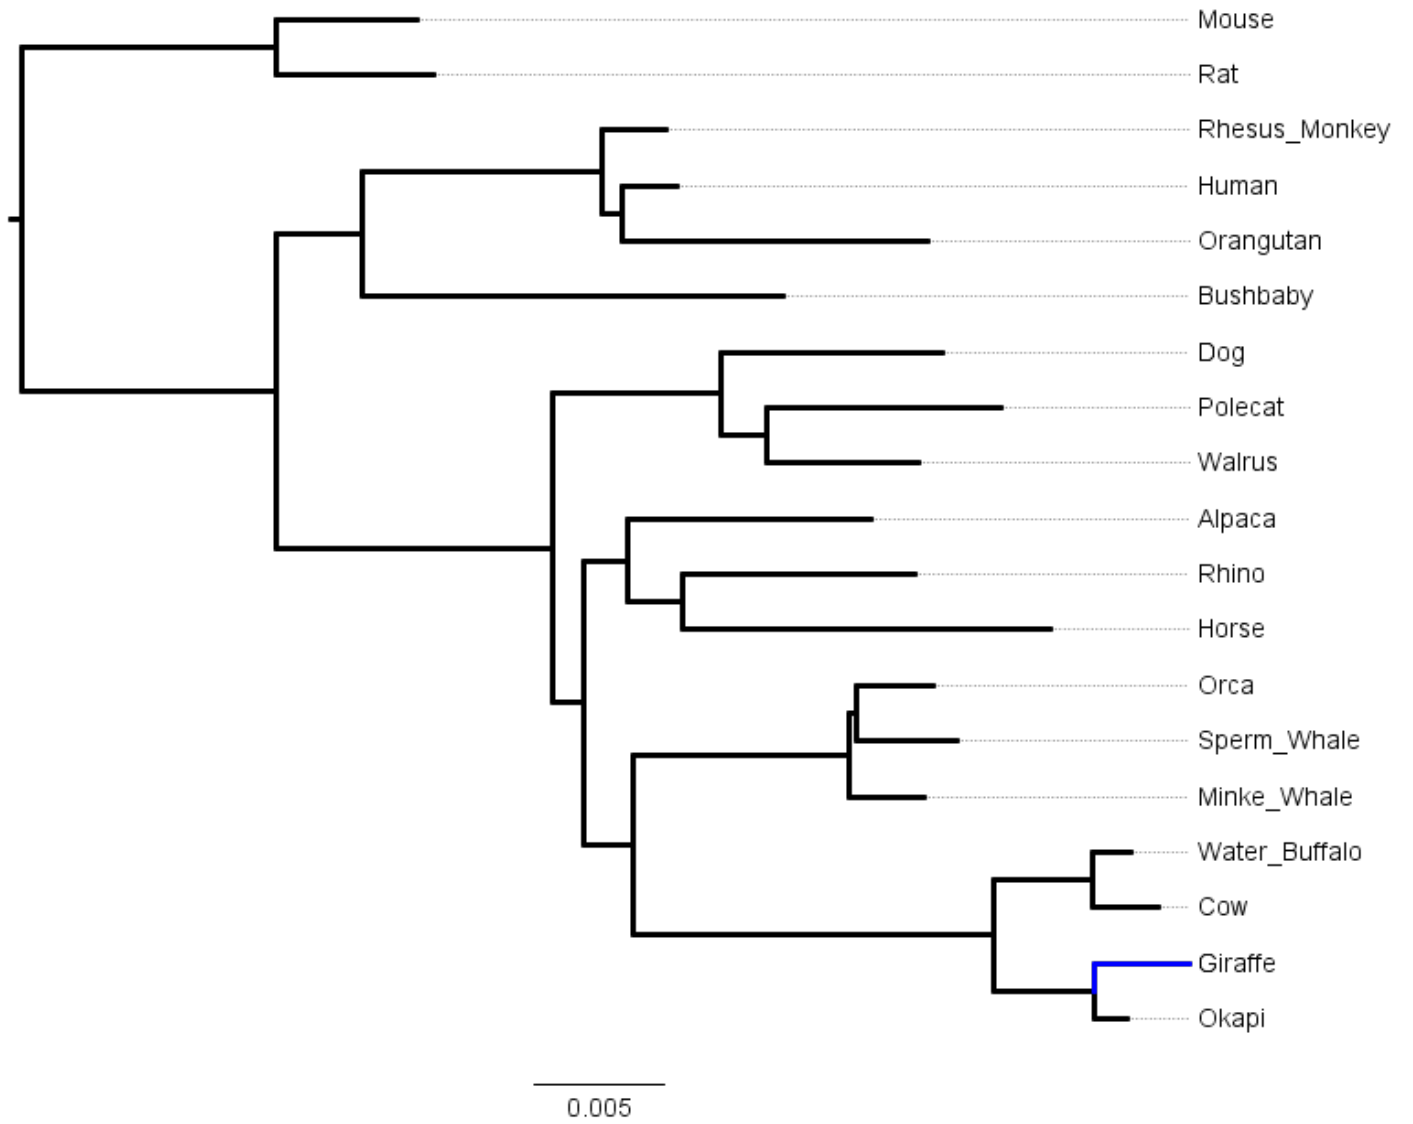

**Locus Name: CREB Binding Protein (CREBBP)**

**Locus Name:** Intraflagellar Transport 74 (IFT74)

ENSBTAT00000026073 IFT74-201 intraflagellar transport protein ciliogenesis kidney, heart, lung  
mouse: heterotaxy syndrome (ambiguous lung lobation) with congenital heart disease, including a common atrium, double outlet right ventricle with atrioventricular septal defect, and dual inferior vena cavae.

PP2: (Giraffe/Okapi) Q7P, E386Q

Giraffe: I121M UIS, S469T UIS  
Giraffe/Okapi: P7Q UPS, Q388E UIS

**Protein sequence Alignment of Cow, Giraffe and Okapi IFT74**

|         |     |                                                                |     |
|---------|-----|----------------------------------------------------------------|-----|
| Cow     | 1   | MASNHKPSAVRPVSRGGIGLTGRPPSGIRPPSGNIRVATGMPPGTARPGSRGGPIGTGGV   | 60  |
| Giraffe | 1   | .....Q.....I.....                                              | 60  |
| okapi   | 1   | .....Q..L.....                                                 | 60  |
|         |     |                                                                |     |
| Cow     | 61  | LSSQIKVADRPVTQQGLSGMKTGMKGPQRQILDKSYLGLLRSKISELTTEINKLQKEIE    | 120 |
| Giraffe | 61  | .....V.....                                                    | 120 |
| Okapi   | 61  | .....V.....                                                    | 120 |
|         |     |                                                                |     |
| Cow     | 121 | MYNQENSVYLSYEKRAETLAVEIKEFQQLADYNMLADKLNTNTEMEEVMDYNMLKAQN     | 180 |
| Giraffe | 121 | I.....                                                         | 180 |
| Okapi   | 121 | .....                                                          | 180 |
|         |     |                                                                |     |
| Cow     | 181 | DRETQSMDIIFTERQAKEKQIRSVEEEIEQEKQAAEGIIKNMSPEKQVKYIEMKTTNEKL   | 240 |
| Giraffe | 181 | .....D.....                                                    | 240 |
| Okapi   | 181 | .....                                                          | 240 |
|         |     |                                                                |     |
| Cow     | 241 | LQELDTLQQQLDSLNMKKESELESEIAHSQVKQEAVLLHEKLYELESHRDQMI AEDKNMGS | 300 |
| Giraffe | 241 | .....K.....                                                    | 300 |
| Okapi   | 241 | .....K.....M.....                                              | 300 |
|         |     |                                                                |     |
| Cow     | 301 | PMEERERLLKQVKEDNQEIASMERQLTDIKEKINQFNEEIRQLDMDLEEHQGE MNQKYKE  | 360 |
| Giraffe | 301 | .....S.....                                                    | 360 |
| Okapi   | 301 | .T.....M...S.....                                              | 360 |
|         |     |                                                                |     |
| Cow     | 361 | LKKREENMDTFIETFEDTKNQELERKAQIEASIVSLEHSSRNINRMKQISSITNQELKM    | 420 |
| Giraffe | 361 | .....E.....E...N.....                                          | 420 |
| Okapi   | 361 | .....E.....E...N.....                                          | 420 |
|         |     |                                                                |     |
| Cow     | 421 | MQDDLNFKSTEMQKSQSTARNLTSQSRLQLDLQKMDLLESKMTEEQQSLKNKIKQMITD    | 480 |
| Giraffe | 421 | .....E.....T.....                                              | 480 |
| Okapi   | 421 | .....E.....                                                    | 480 |
|         |     |                                                                |     |
| Cow     | 481 | LETYNDLAALKSSGEEKKKLHQEKTVLSTRNFAFKKIMEKLNTEWETLKTQLQENETHS    | 540 |
| Giraffe | 481 | .....R.....C.....                                              | 540 |
| Okapi   | 481 | .....R.....C.....                                              | 540 |
|         |     |                                                                |     |
| Cow     | 541 | QLTNLERKQWHEQNNFVMKEFIATKSQESDYRPIMKNVSKQIAEYNKNIVDALHSMSRN    | 600 |
| Giraffe | 541 | .....QQ.....S....S.M.....                                      | 600 |
| Okapi   | 541 | .....QQ.....S.M.....                                           | 600 |

**Newick Tree of Mammalian IFT74**

((rat:0.010688, mouse:0.00781656):0.0235145, (manatee:0.0190562, ((rhesus\_macaque:0.0095176, (orangutan:0.0109874, human:0.0160446):0.0265336):0.0326271, bushbaby:0.0395034):0.000633869, ((dog:0.0149467, tiger:0.0189613):0.00506636, (horse:0.0195728, rhino:0.0229996):0.00537898):0.00157705, (pig:0.034436, (camel:0.00120612, alpaca:0.00381483):0.0232989):0.00112892, ((baiji\_dolphin:0.0129324, (orca:0.00392894, dolphin:0.026535):0.00235439):0.00115393, (sperm\_whale:0.00512886, minke\_whale:0.00829456):0.000526762):0.0181528, (((cow:0.00166106, yak:0.00502798):0.0045889, ((goat:0, sheep:0.00503199):0.00186817, tibetan\_antelope:0.00315708):0.00214983):0.00469667, (giraffe:0.00869598,

okapi:0.00641823):0.0123638):0.0110942):0.00206966):0.00321477):0.00225747):0.00522931):0.0235145);

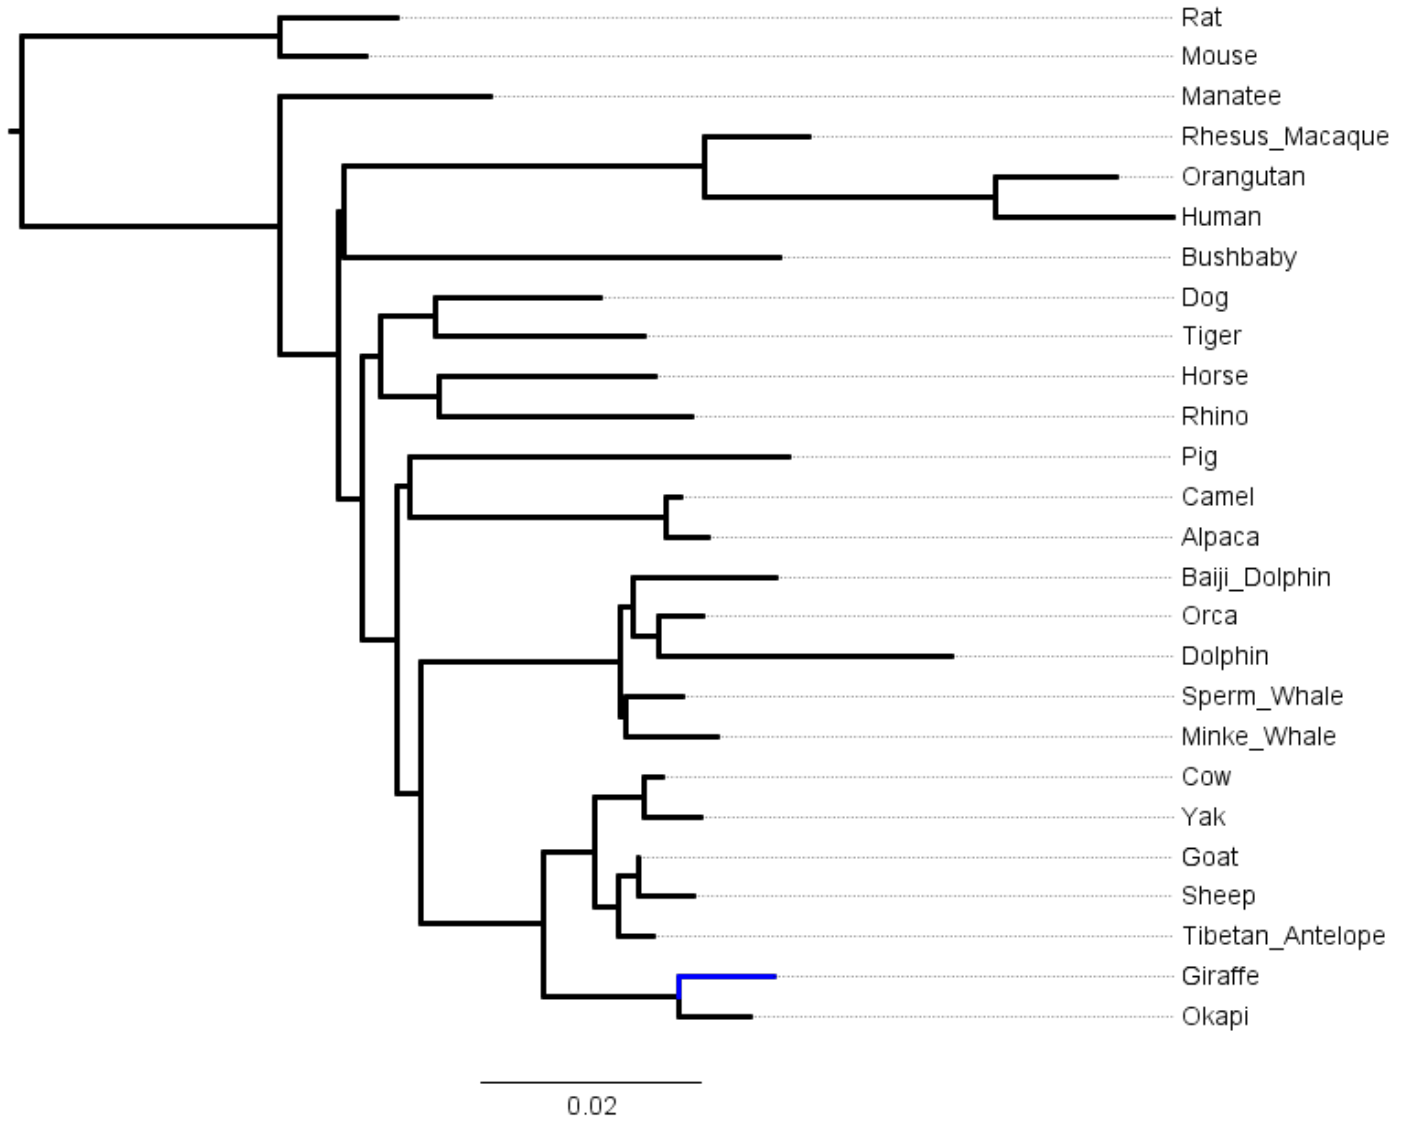

**Locus Name:** Intraflagellar Transport 74 (**IFT74**)

**Locus name: Abhydrolase domain-containing protein 2 (ABHD2)**

ENSBTAT00000026579 ABHD2-201 abhydroloase smooth muscle cell migration  
mouse: Increase of smooth muscle cell migration and of intimal and femoral artery hyperplasia

PP2: (Giraffe) F14S, V25A

Giraffe: M5T UPS, T7A UIS

**Protein sequence Alignment of Cow, Giraffe and Okapi ABHD2**

|         |     |                                                              |     |
|---------|-----|--------------------------------------------------------------|-----|
| Cow     | 1   | MNAMMTESELPAVFDGVLAAVAALVYVIVRCLNLKSPPTAPPDLYFQDSGLSRFLKSCP  | 60  |
| Giraffe | 1   | ....T.A.....S.....A.....                                     | 60  |
| Okapi   | 1   | .....                                                        | 60  |
|         |     |                                                              |     |
| Cow     | 61  | LLTKEYIIPPLIWGKSGHIQTALYGKMGRVRSHPYGHRKFITMSDGATSTFDLFEPLAEH | 120 |
| Giraffe | 61  | .....                                                        | 120 |
| Okapi   | 61  | .....                                                        | 120 |
|         |     |                                                              |     |
| Cow     | 121 | CVGDDITMVICPGIANHSEKQYIRTFVDYAQKNGYRCAVLNHLGALPNIELTSPRMFTYG | 180 |
| Giraffe | 121 | ...G.....                                                    | 180 |
| Okapi   | 121 | ...G.....                                                    | 180 |
|         |     |                                                              |     |
| Cow     | 181 | CTWEFGAMVNYIKKTYPLTQLVVVGFSLGGNIVCKYLGETQANQEKVLCVSVCCQGYALS | 240 |
| Giraffe | 181 | .....                                                        | 240 |
| Okapi   | 181 | .....                                                        | 240 |
|         |     |                                                              |     |
| Cow     | 241 | RAQETFMQWDQCRRFYNFLMADNMKKIILSHRQALFGDHVKKPQSLEDTDLRSLYTATSL | 300 |
| Giraffe | 241 | .....                                                        | 300 |
| Okapi   | 241 | .....                                                        | 300 |
|         |     |                                                              |     |
| Cow     | 301 | MQIDDNVMRKFFHGYNSLKEYEESCMRYLHRIYVPLMLVNAADDPLVHESLLAIPKSL   | 360 |
| Giraffe | 301 | .....T.....                                                  | 360 |
| Okapi   | 301 | .....T.....                                                  | 360 |
|         |     |                                                              |     |
| Cow     | 361 | EKRENVFVPLPHGGHLGFFEGSVLFPPEPLTWMDKLVVEYANAICQWERNKSQCSDEL   | 420 |
| Giraffe | 361 | .....                                                        | 420 |
| Okapi   | 361 | .....                                                        | 420 |
|         |     |                                                              |     |
| Cow     | 421 | EADLE                                                        | 425 |
| Giraffe | 421 | .....                                                        | 425 |
| Okapi   | 421 | .....                                                        | 425 |

**Newick Tree of Mammalian ABHD2**

(Myotis\_Brandtii\_Bat:0.0126674, ((Human:0, (Alpaca:0, Camel:0.00237069):0.0023949):0.000939286, (Bushbaby:0.0122577, (((Orca:0.000272192, Baiji\_Dolphin:0.00208352):0.00220453, (Elephant:0.0115901, Aardvark:0.0122228):0.0145693):0.00222634, Horse:0.0121795):8.83777e-05, (((Cat:0.00264401, (Rat:0.000996293, Mosue:0.00372071):0.00164659, (Walrus:0.00206951, (Panda:0.00235655, Bear:0):0.000288992):0.000721738):0.00267525):0.00210213, Rhesus\_Monkey:0.000552941):0.000377952, (Pig:0.00384487, (Rhino:0.0022047, ((Giraffe:0.0088849, Okapi:0.000549268):0.00182319, (Cow:0, (Tibetan\_Antelope:0.0023623, Water\_Buffalo:0):1.21775e-05):0.00292207):0.00431142):0.000888741):0.00155592):0.00062221):0.00141323):0.000919206):0.0126674);

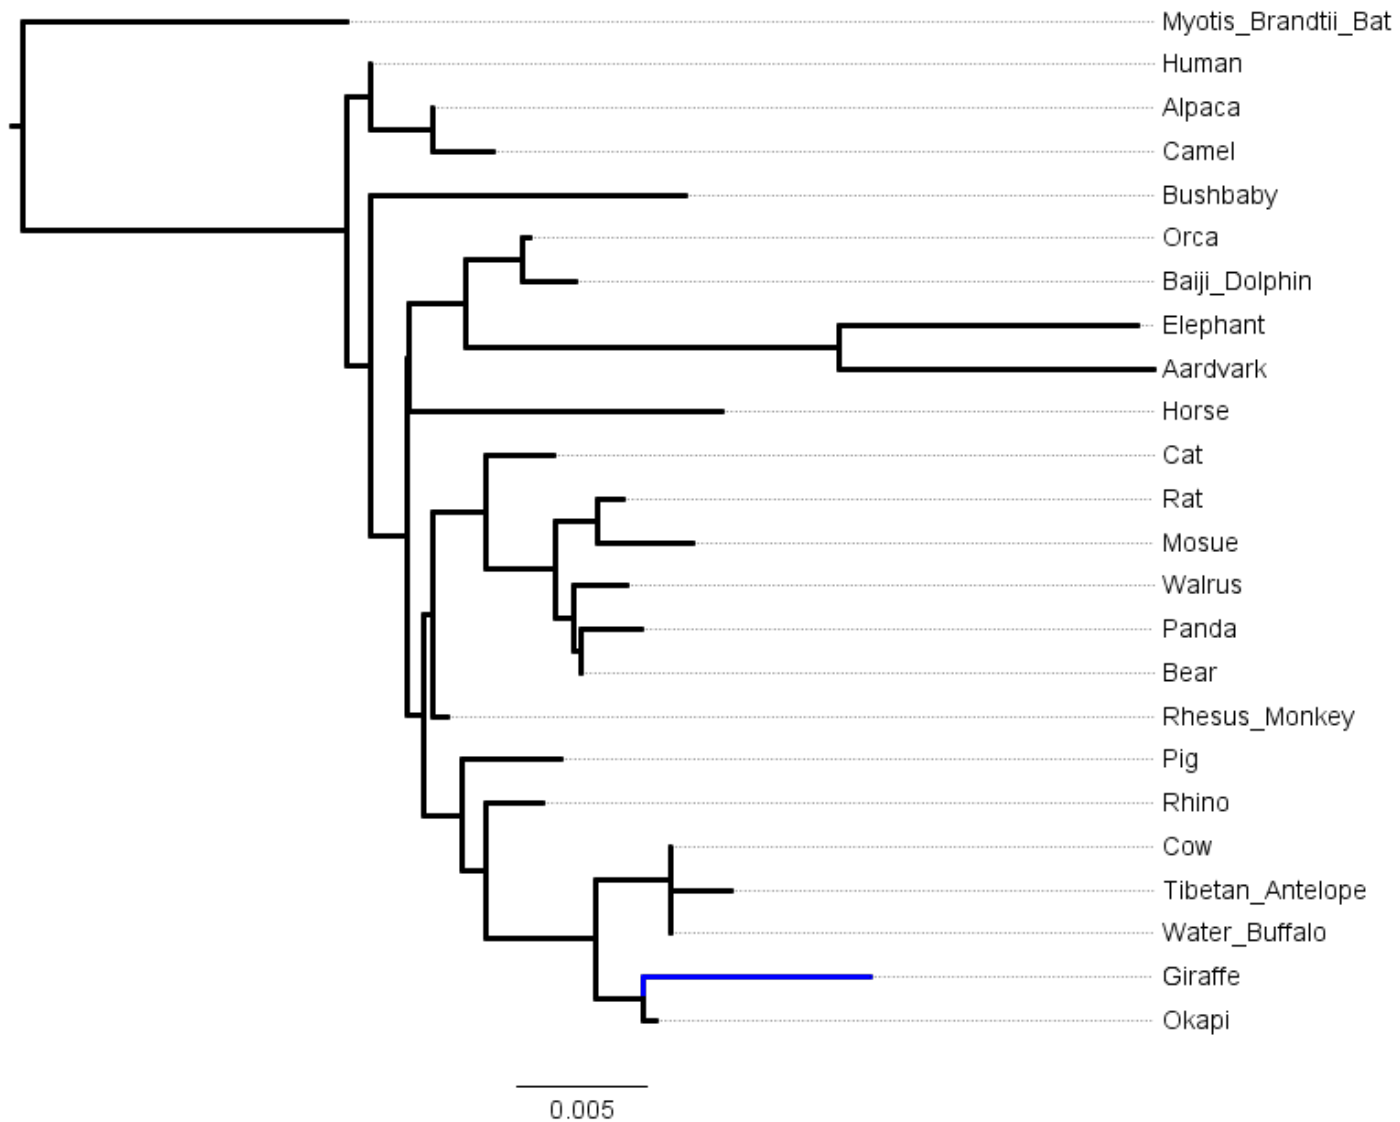

**Locus name: Abhydrolase domain-containing protein 2 (ABHD2)**

**Locus Name: Endoglin (ENG)**

ENSBTAT0000054745 ENG-201 endoglin regulation of angiogenesis  
mouse: defective vascular development, extra-arterial hematopoiesis, cardiac defects and die by embryonic day 11.0. Heterozygotes develop hemorrhagic telangiectasia causing strokes, fatal hemorrhage and heart failure

PP2: (Giraffe) S434, Q436S, R437Q; (Giraffe/Okapi) V426R, V427P, N428G, L430H, S431Q; (Okapi) T193M

Giraffe: C17F UIS

Giraffe/Okapi: D128H UPS, multi-UPS 419-427

**Protein sequence Alignment of Cow, Giraffe and Okapi ENG**

|         |     |                                                                |     |
|---------|-----|----------------------------------------------------------------|-----|
| Cow     | 1   | MDRGVLCQAMALLLVVCSLGPTSLAETVYCDLQPVDSEVTVTSQVSEGCVAQIPDATLE    | 60  |
| Giraffe | 1   | ....A....I.....F..S.....K.....                                 | 60  |
| Okapi   | 1   | ....A....V.....S.....K.....                                    | 60  |
|         |     |                                                                |     |
| Cow     | 61  | VHVLFLTFLGDVSRLELTQTSKQGGIRPREVLLILSVNKSIFLKLQAPGIPLQLAYDSK    | 120 |
| Giraffe | 61  | .....E.Q.....A.....W.....P.                                    | 120 |
| Okapi   | 61  | .....E.....P.                                                  | 120 |
|         |     |                                                                |     |
| Cow     | 121 | LVFHEALDANITQLPSFTTKDQLLNWANTQGSIASVAELSNPQSIFLRLDQASSPFCSCN   | 180 |
| Giraffe | 121 | .....H..T.....K.P.T.A...N..K..L.....A....S                     | 180 |
| Okapi   | 121 | .....H..T.....K.P...A...N..K..L.H.....A....S                   | 180 |
|         |     |                                                                |     |
| Cow     | 181 | LEPQKDMGHTLGWTPKAWGCRLEGVAGHKEAHILRILPGPEASPRTVTVKLELSCAWRDT   | 240 |
| Giraffe | 181 | .....E.S...Y.....W.....                                        | 244 |
| Okapi   | 181 | .....M.E.S...Y.....W.....                                      | 244 |
|         |     |                                                                |     |
| Cow     | 241 | DAAVLILQGPPYVSWLIEANHNMQIWTGTGEYSLKIFPDRINPGFQLPNTTQGLLGEARRL  | 300 |
| Giraffe | 245 | E.....D.....                                                   | 304 |
| Okapi   | 245 | E.....D.....                                                   | 304 |
|         |     |                                                                |     |
| Cow     | 301 | NASVVASFVELPVDVSLRTHSCGSLQPSPTPVEITTPNKGCNQELLLTLIQPKCSSD      | 360 |
| Giraffe | 305 | .....L.S....K.....                                             | 364 |
| Okapi   | 305 | .....L.S....K.....                                             | 364 |
|         |     |                                                                |     |
| Cow     | 361 | GMTLVLKKDLISTLLCTIKSLTFGDSSCQAKETEDEFVLSSGYSSCGMEVMENVVSNEVV   | 420 |
| Giraffe | 365 | .....T...W.....E.....G                                         | 426 |
| Okapi   | 365 | .....T...W.....E.....G                                         | 426 |
|         |     |                                                                |     |
| Cow     | 421 | IRLLSSSSPQRKKVQCINTDLSLQLGLYLSPHFLQASDTIELGQQGFVQVSVSPSIPEL    | 480 |
| Giraffe | 427 | THQA.LP....-.....M.....N.....                                  | 485 |
| Okapi   | 427 | THQA.LL....-.....M.....N.....                                  | 485 |
|         |     |                                                                |     |
| Cow     | 481 | MIQLESCQLNLGPDMEIVELIQGQEAKSSCVSLLSPSPSGDIRFSFLLRGMVPMPTTGI    | 540 |
| Giraffe | 486 | .....N.....L.....                                              | 545 |
| Okapi   | 486 | .....L.....                                                    | 545 |
|         |     |                                                                |     |
| Cow     | 541 | LSCSVTMHPRIRSLEVHKTVSTRNLNIISTSLHDKGLVLPVAVLGITFGAFLIGALLTAALW | 600 |
| Giraffe | 546 | .....V.A.....                                                  | 605 |
| Okapi   | 546 | .....V.A.....                                                  | 605 |
|         |     |                                                                |     |
| Cow     | 601 | YIYSHTRHPGKREPVVAVAAPASSESSSTNHSIGSTQSTPCSTSSMA                | 647 |
| Giraffe | 606 | .....                                                          | 652 |
| Okapi   | 606 | .....                                                          | 652 |

**Newick Tree of Mammalian ENG**

((elephant:0.072431, (((human:0.010522, orangutan:0.0109859):0.0208525, macaque:0.0319625):0.0977316, (rat:0.0657712, mouse:0.128808):0.124244):0.00872041, (((cat:0.00336395, tiger:0.0261992):0.0512544, ((panda:0.0049737, polar\_bear:0.0490313):0.0321168, walrus:0.036087):0.00816102, dog:0.0540564):0.01956):0.0375917, (rhino:0.073731, Przewalskii\_s\_horse:0.138861):0.0213191):0.00223153, (((sperm\_whale:0.0141981, (orca:0.00166369, bottle\_nose\_dolphin:0.00288523):0.00870219, baiji\_dolphin:0.00811665):0.00307396):0.00154817, minke\_whale:0.00733948):0.0437027, (alpaca:0.00787746, camel:0.0104727):0.0799427):0.012384, (pig:0.136796, ((goat:0.0194578, sheep:0.0019086):0.00324475, tibetian\_antelope:0.00545567):0.0151977, (water\_buffalo:0.00266271,

(yak:0.00215987, cow:0.0055982):0.00590166):0.01563):0.0103541, (giraffe:0.0119799, okapi:0.00503603):0.0213213):0.104162):0.00441165):0.0318778):0.0389065):0.072431);

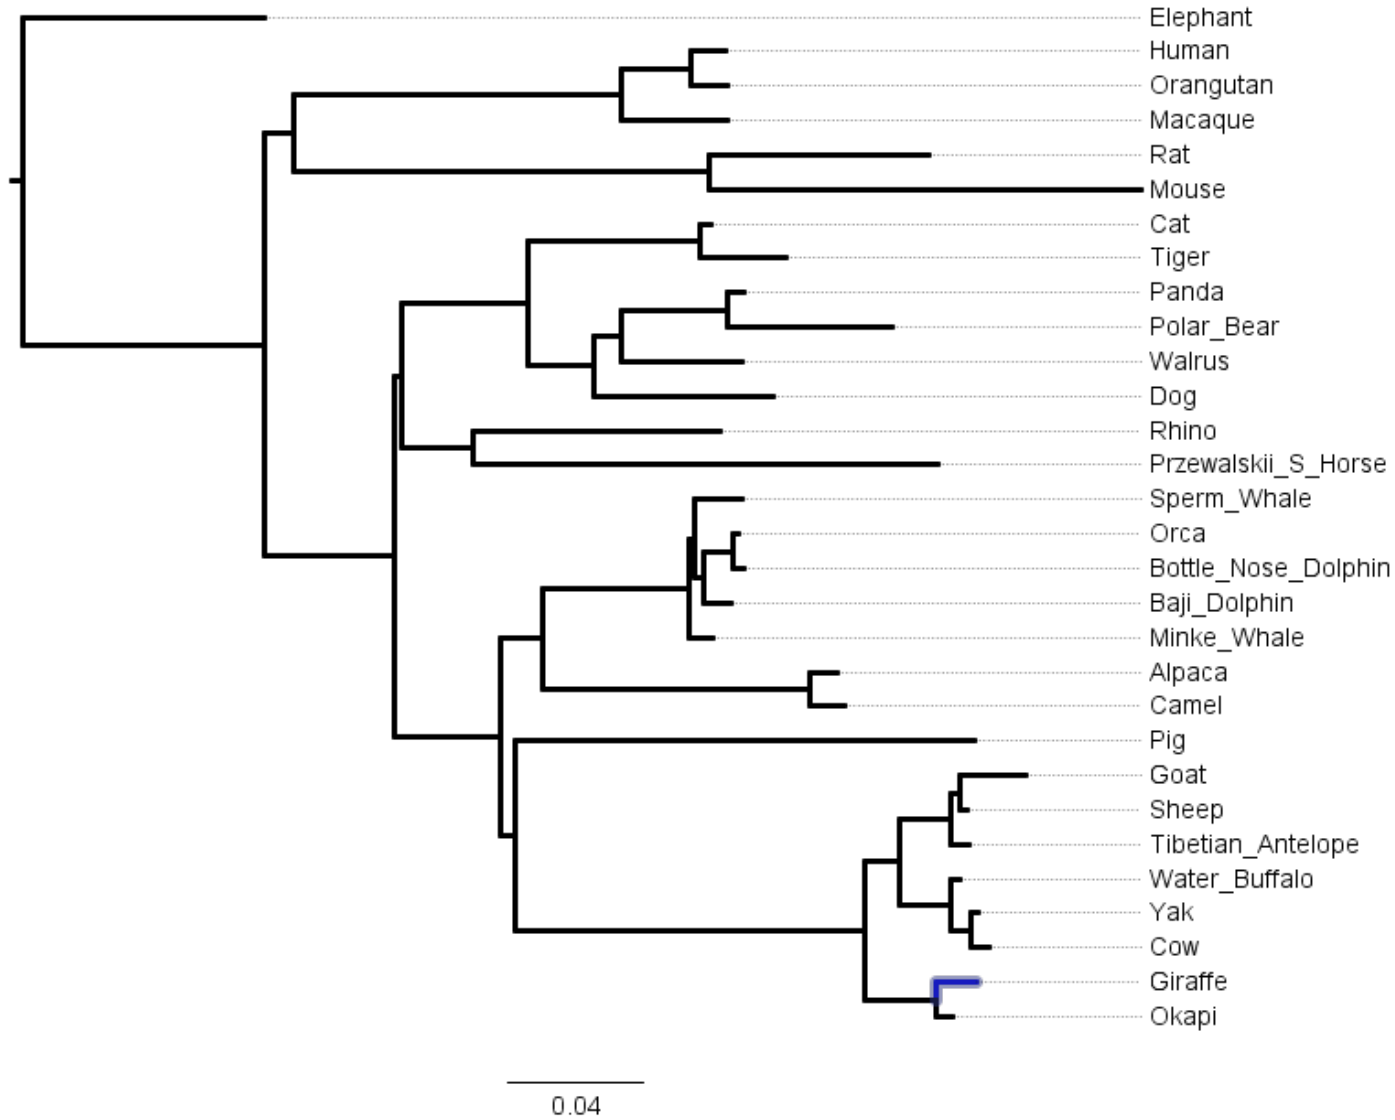

**Locus Name: Endoglin (ENG)**

**Locus Name: Semaphorin 3E (SEMA3E)**

ENSBTAT00000019866 SEMA3E-201 semaphorin 3E regulates angiogenesis and neuronal synaptogenesis in eye  
 mouse: abnormal intersomitic vascular development and loss of the normal segmented somite pattern

PP2: (Giraffe) F227L

Giraffe: A39E UIS, F227L UIS, P694Q UIS  
 Giraffe/Okapi: Y30S UIS, K313R UIS, V503I UIS  
 Okapi: I393L UIS, D570E

**Protein sequence Alignment of Cow, Giraffe and Okapi SEMA3E**

|         |     |                                                               |     |
|---------|-----|---------------------------------------------------------------|-----|
| Cow     | 1   | MLLDEYQERLQVGGKDLVYSLSLEHISGSYREIHWSTALKTEECIMKGNDASECANYVR   | 60  |
| Giraffe | 1   | .....I.....S.....E.....N.....                                 | 60  |
| Okapi   | 1   | .....S.....N.....                                             | 60  |
| Cow     | 61  | VLHHYNRTHLLTCGTGAFDPLCAFIRVGYHLEAPLFHLESHRSERGRGRCPDFPSSSFIS  | 120 |
| Giraffe | 61  | .....                                                         | 120 |
| Okapi   | 61  | .....                                                         | 120 |
| Cow     | 121 | TLIGSELFAGLYSDYWGRDAAIFRSLGRLAQIRTEHDDERLLKEPKFVGSYMIPDNEDRD  | 180 |
| Giraffe | 121 | .....                                                         | 180 |
| Okapi   | 121 | .....                                                         | 180 |
| Cow     | 181 | DNKVYFFFTEKALEAENSAHAIYTRVGRLCVNDMGGQRILVKNKWFLLKARLVCSVPGMN  | 240 |
| Giraffe | 181 | .....L.....                                                   | 240 |
| Okapi   | 181 | .....                                                         | 240 |
| Cow     | 241 | GIDTYFDELEDVFLHTRDHKNPVIIFGLFNTTSNIFRGHAICVYHMSSIRAAFNGPYAHK  | 300 |
| Giraffe | 241 | .....                                                         | 300 |
| Okapi   | 241 | .....                                                         | 300 |
| Cow     | 301 | EGPEYHWSLYEGKVPYPRPGSCASKVNGGRYETTKDYRDDAIRFARSHPLMYQPIKPAHK  | 360 |
| Giraffe | 301 | .....R.....R                                                  | 360 |
| Okapi   | 301 | .....R.....R                                                  | 360 |
| Cow     | 361 | KPILVKTGKYNLQKQIAVDRVEAEDGQYDVLFIGTDNGIVLKVITIIYNQETESMEEVILE | 420 |
| Giraffe | 361 | .....                                                         | 420 |
| Okapi   | 361 | .....L.....                                                   | 420 |
| Cow     | 421 | ELQIFKDPVPIISMEISSKRQQLYIGSASAVAQVRFHQCDMYGSACADCCCLARDPYCAWD | 480 |
| Giraffe | 421 | .....                                                         | 480 |
| Okapi   | 421 | .....                                                         | 480 |
| Cow     | 481 | GISCSRYPTGTHAKRRFRQRDVRHGNAAQQCFGQQFVGDALDKTEERLAYGIENNSTLL   | 540 |
| Giraffe | 481 | .....S.....I.....                                             | 540 |
| Okapi   | 481 | .....S.....I.....                                             | 540 |
| Cow     | 541 | ECTPRSLQAKVIWFVQKGRDARKEEVKTDTRVVKMDLGLLFLRVRMDAGTYFCQTVSHS   | 600 |
| Giraffe | 541 | .....L.....                                                   | 600 |
| Okapi   | 541 | .....E.....E.....L.....                                       | 600 |
| Cow     | 601 | FVHTIRKITLEVVEEERVEEMFNKDFEEDRLHKMPCPAQSIIIPRGTKPWYKEFLQLIGYS | 660 |
| Giraffe | 601 | .....V.....                                                   | 660 |
| Okapi   | 601 | .....V.....                                                   | 660 |
| Cow     | 661 | NFQRVEEYCEKVVWCTDKKRKLLKMSPSKWYANPQEKLRPKTEHYRLPRHALDS        | 716 |
| Giraffe | 661 | .....Q.....                                                   | 716 |
| Okapi   | 661 | .....                                                         | 716 |

**Newick Tree of Mammalian SEMA3E**

((mouse:0.00819491, rat:0.0130089):0.0312075, ((human:0.0017264, macaque:0.00388374):0.0235086, (lemur:0.0361279, ((elephant:0.0154507, (aardvark:0.0158782, manatee:0.0168242):0.000900524):0.0127502, ((rhino:0.0163994, horse:0.035285):0.00371721, ((Weddell\_seal:0.00624211, walrus:0.0178236):0.00280579, panda:0.0413091):0.00617642, (cat:0.00132043, tiger:0.00288422):0.0110247):0.00386472):0.00176243, (big\_brown\_bat:0.0225403,



((pig:0.0228876, (alpaca:0.00319824, camel:0.00805387):0.0187613):0.000572052, ((sperm\_whale:0.00483996, minke\_whale:0.00782768):0.000373036, (baiji\_dolphin:0.00130628, orca:0.00853232):0.00601937):0.012962):0.000514436, ((yak:0.00253409, cow:0.000267038):0.000442011, ((tibetan\_antelope:0.0040512, (sheep:0.00140707, goat:0.00279758):0.000160362):0.0071345, (water\_buffalo:0.00416397, (giraffe:0.00565158, okapi:0.00418703):0.00855504):0.00139084):0.000935351):0.0185334):0.00349495):0.000702794):0.00589418):0.00413213):0.00266778):0.0312075);

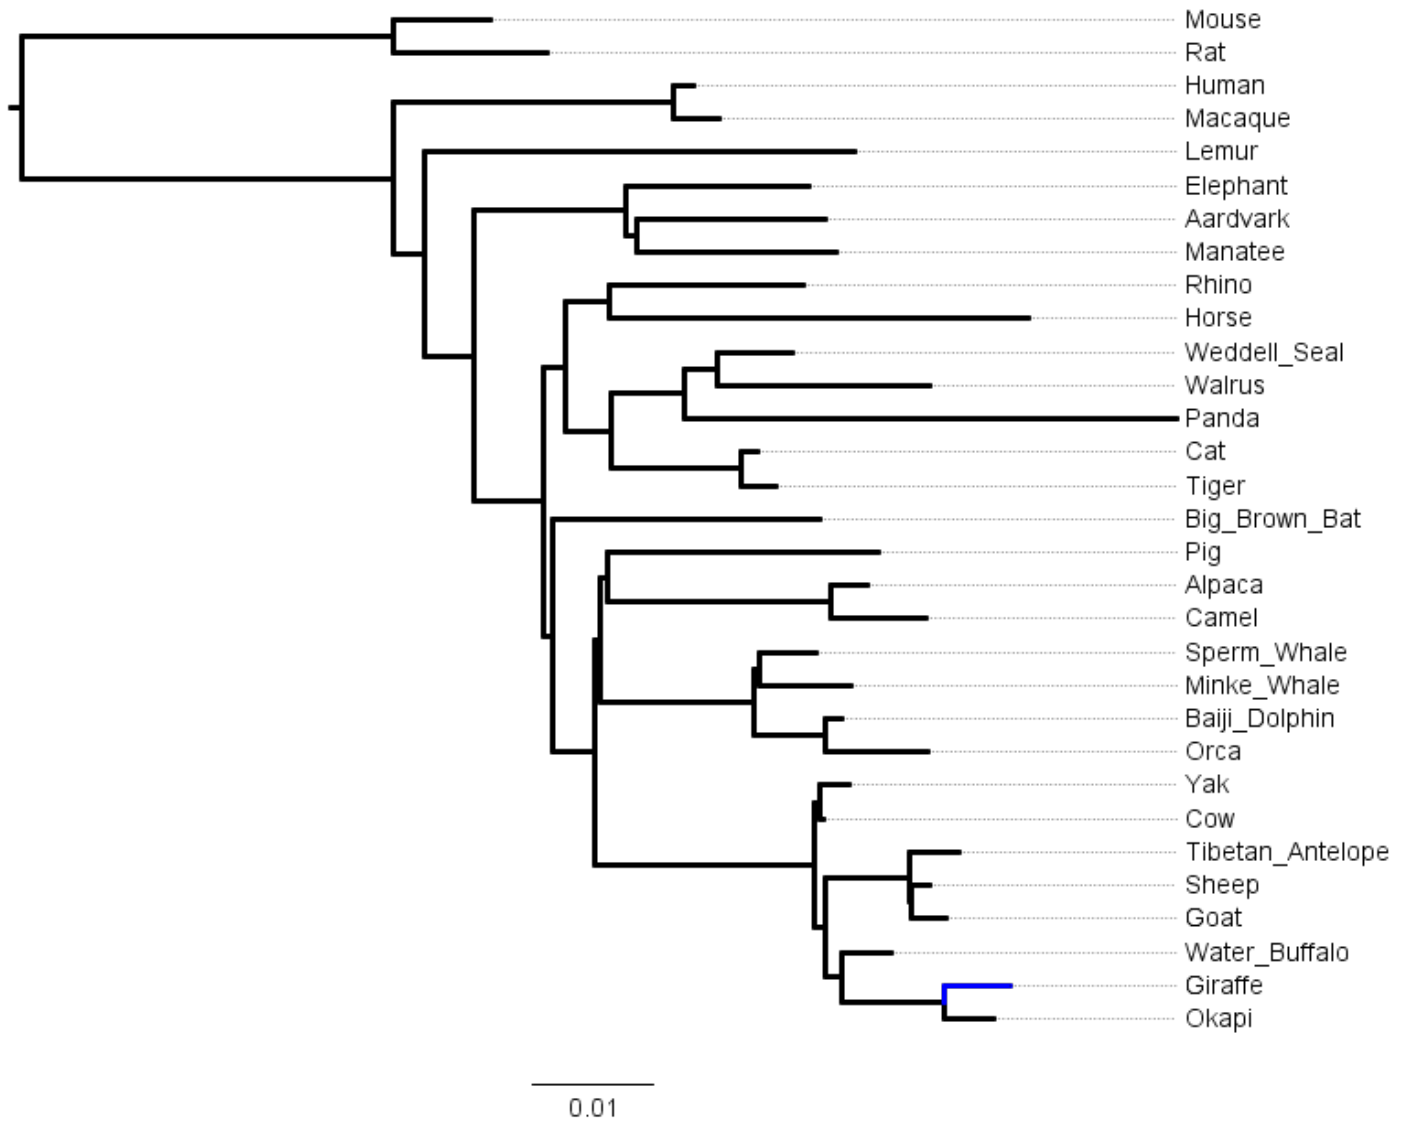

**Locus Name: Semaphorin 3E (SEMA3E)**

**Locus Name: Jumonji, AT Rich Interactive Domain 2 (JARID2)**

ENSBTAT0000017189 JARID2-201 modulates histone methyltransferase heart and nervous system development  
 mouse: defective neural tube closure, impaired hematopoiesis and hypoplasia of liver, thymus and spleen. Homozygotes for another mutation die at birth with cardiac defects. In cardiac cells, it is required to repress expression of cyclin-D1 (CCND1) by activating methylation of 'Lys-9' of histone H3

PP2: (Giraffe/Okapi) S313P, E802D, K1124R

Giraffe: A256L UPS, A272G UPS

Giraffe/Okapi: N200T UIS, A291T UPS, N307S UPS, T310A UIS, S314P UIS, M325L UPS, P442S UPS, K1125R UIS

**Protein sequence Alignment of Cow, Giraffe and Okapi JARID2**

|         |     |                                                               |     |
|---------|-----|---------------------------------------------------------------|-----|
| Cow     | 1   | MSKERPKRNIIQKKYDDSDGIPWSEERVVRKVLVLSLKEFKNAQKRQHGEIGIPGSLKAVN | 60  |
| Giraffe | 1   | .....                                                         | 60  |
| Okapi   | 1   | .....                                                         | 60  |
| Cow     | 61  | GLLNGQSKGLGPASEQSENEKDDASQVSSTSNDVSSSDFEEGPSRKRPRLQAQRKFAQS   | 120 |
| Giraffe | 61  | .....                                                         | 120 |
| Okapi   | 61  | .....                                                         | 120 |
| Cow     | 121 | QPNSPSTTPVKIVEPLPPATQISDLKRKPKTEDFLTFCLRGSPALPNSMVYFGSSQ      | 180 |
| Giraffe | 121 | .....                                                         | 180 |
| Okapi   | 121 | .....                                                         | 180 |
| Cow     | 181 | DEEDVEEEDDETEDVKAATNNASSCQSTPRKKGKAHKHVHNGHVFNSSRSREKDPVQK    | 240 |
| Giraffe | 181 | .....T.....T.....                                             | 240 |
| Okapi   | 181 | .....T.....T.....                                             | 240 |
| Cow     | 241 | HKSKEATPAKEKHS DARADARREQVSASHPPAAPAGSSAKGLAAHHHPALHRSAQDLR   | 300 |
| Giraffe | 241 | .R.....EL.....A..Q..G.....R.....L.T.....                      | 300 |
| Okapi   | 241 | .....E.....A.V...V...V.....L.T.....                           | 300 |
| Cow     | 301 | KQVSKVNGVTRMSSLGTSATSAKKMREVRPSPKTVKYTATVTKGTVTYTKAKRELVKET   | 360 |
| Giraffe | 301 | .....S..A...P...G.....L.....A                                 | 360 |
| Okapi   | 301 | .....S.AA...P...G.....L.....R.A                               | 360 |
| Cow     | 361 | KPHHHKPSAVNHTISGKTESSNAKTRKQVLSLGGASKSTGPAVNGLVKVSGRNLNPKSCTK | 420 |
| Giraffe | 361 | .....R.....                                                   | 420 |
| Okapi   | 361 | .....A.....R.....H.....P.....                                 | 420 |
| Cow     | 421 | EVGGRQLREGLRNSKRRL EEVPPADKQPSPPKMKGAAGSAAEGPGRKAAPGPAEKAPLG  | 480 |
| Giraffe | 421 | .....AS.....M.....                                            | 480 |
| Okapi   | 421 | .G.....AS...Q.....V.....R..L.....P.                           | 480 |
| Cow     | 481 | APGKKEAPERSLERNRPKRAAAGKGPGRQAHGKPDGGAPCENRSTSQSEPLPRPHEGAA   | 540 |
| Giraffe | 481 | G....V.....S.....                                             | 540 |
| Okapi   | 481 | G....V.....S.....H.....                                       | 540 |
| Cow     | 541 | KAKEGAGRAGWAAMDEIPVLRPSAKEFHDPLVYIESVRPQVEKYGMCRVIPPPDWRPECK  | 600 |
| Giraffe | 541 | .....                                                         | 600 |
| Okapi   | 541 | .....                                                         | 600 |
| Cow     | 601 | LNDEMRFVTQIQHIHKLGRRWGPNVQRLACIKKHLRSQGITMDELPLIGGCELDLCFFR   | 660 |
| Giraffe | 601 | .....                                                         | 660 |
| Okapi   | 601 | .....                                                         | 660 |
| Cow     | 661 | LINEMGGMQQVTDLKKWNKLADMLRIPRTAQDRLAKIQEAYCQYLLSYDLSLSPEEHRRL  | 720 |
| Giraffe | 661 | .....                                                         | 720 |
| Okapi   | 661 | .....                                                         | 720 |
| Cow     | 721 | KEVLMEKESLERRKGPLEGHTEQDYHRFHPLPRFEPKNGLINGVAHRNGFRSKLKEVGPA  | 780 |
| Giraffe | 721 | .....                                                         | 780 |
| Okapi   | 721 | .....T                                                        | 780 |

|         |      |                                                                |      |
|---------|------|----------------------------------------------------------------|------|
| Cow     | 781  | QLKTGRRRLFAQEKEVVKEEEEEDKGILSDFHKCIYKGRSVSLTTFYRTARNIMMCFKSKE  | 840  |
| Giraffe | 781  | .....E.....                                                    | 840  |
| Okapi   | 781  | .....E.....                                                    | 840  |
| Cow     | 841  | PAPAEIEQEYWRLVEEKDCHVAVHCGKVDNTNTHGSGFPVKGSEPFSSRHGWNLTVLPNNTG | 900  |
| Giraffe | 841  | .....                                                          | 900  |
| Okapi   | 841  | .....                                                          | 900  |
| Cow     | 901  | SILRHLGAVPGVTIPWLNIGMVFSTSCWSRDQNHLPYIDYLHTGADCIWYCIPAEEEHKL   | 960  |
| Giraffe | 901  | .....N..                                                       | 960  |
| Okapi   | 901  | .....N..                                                       | 960  |
| Cow     | 961  | EDVVHTLLQANGTPGLQMLESNVMISPEVLCREGIKVHRTVQQSGQFVVCPPGSFVSKVC   | 1020 |
| Giraffe | 961  | .....V.....                                                    | 1020 |
| Okapi   | 961  | .....                                                          | 1020 |
| Cow     | 1021 | CGYSVSETVHFATTQWTSMGFETAKEMKRRHIAPKPFMEKLLYQIAQAEAKKENGPTLST   | 1080 |
| Giraffe | 1021 | .....                                                          | 1080 |
| Okapi   | 1021 | .....                                                          | 1080 |
| Cow     | 1081 | ISALLDELDRDTELRRQQLFEAGLHSSARYGSHDGSSAAPDGKKKPRKWLQLETSSERRCQ  | 1140 |
| Giraffe | 1081 | .....R.....                                                    | 1140 |
| Okapi   | 1081 | .....R.....                                                    | 1140 |
| Cow     | 1141 | VCQHLCYLSMVVQENENVVFCLECALRHVEKQKSCRGLKLMYRYDEEQIISLVNQICGKV   | 1200 |
| Giraffe | 1141 | .....                                                          | 1200 |
| Okapi   | 1141 | .....                                                          | 1200 |
| Cow     | 1201 | SGKNGSIENCLSKPTPKRGPRKRATVDVPPSRLASS                           | 1236 |
| Giraffe | 1201 | .....                                                          | 1236 |
| Okapi   | 1201 | .....                                                          | 1236 |

**Newick Tree of Mammalian JARID2**

((mouse:0.0143285, rat:0.0186293):0.0166807, (((human:0.00534, macaque:0.00271815):0.00815442, lemur:0.0164536):0.00922036, (aardvark:0.027892, (((rhino:0.00804583, horse:0.00816269):0.00868825, (Brandt\_s\_bat:0.00152453, mouse\_eared\_bat:0.00251263):0.0168041):0.000590236, (walrus:0.0118426, dog:0.00919531):0.00819426):0.000571848, ((orca:0.00718431, sperm\_whale:0.0083205):0.0110135, (cow:0.00720798, (giraffe:0.00599024, okapi:0.0119704):0.0108826):0.00763952):0.0198209):0.00477126):0.00472721):0.0166807);

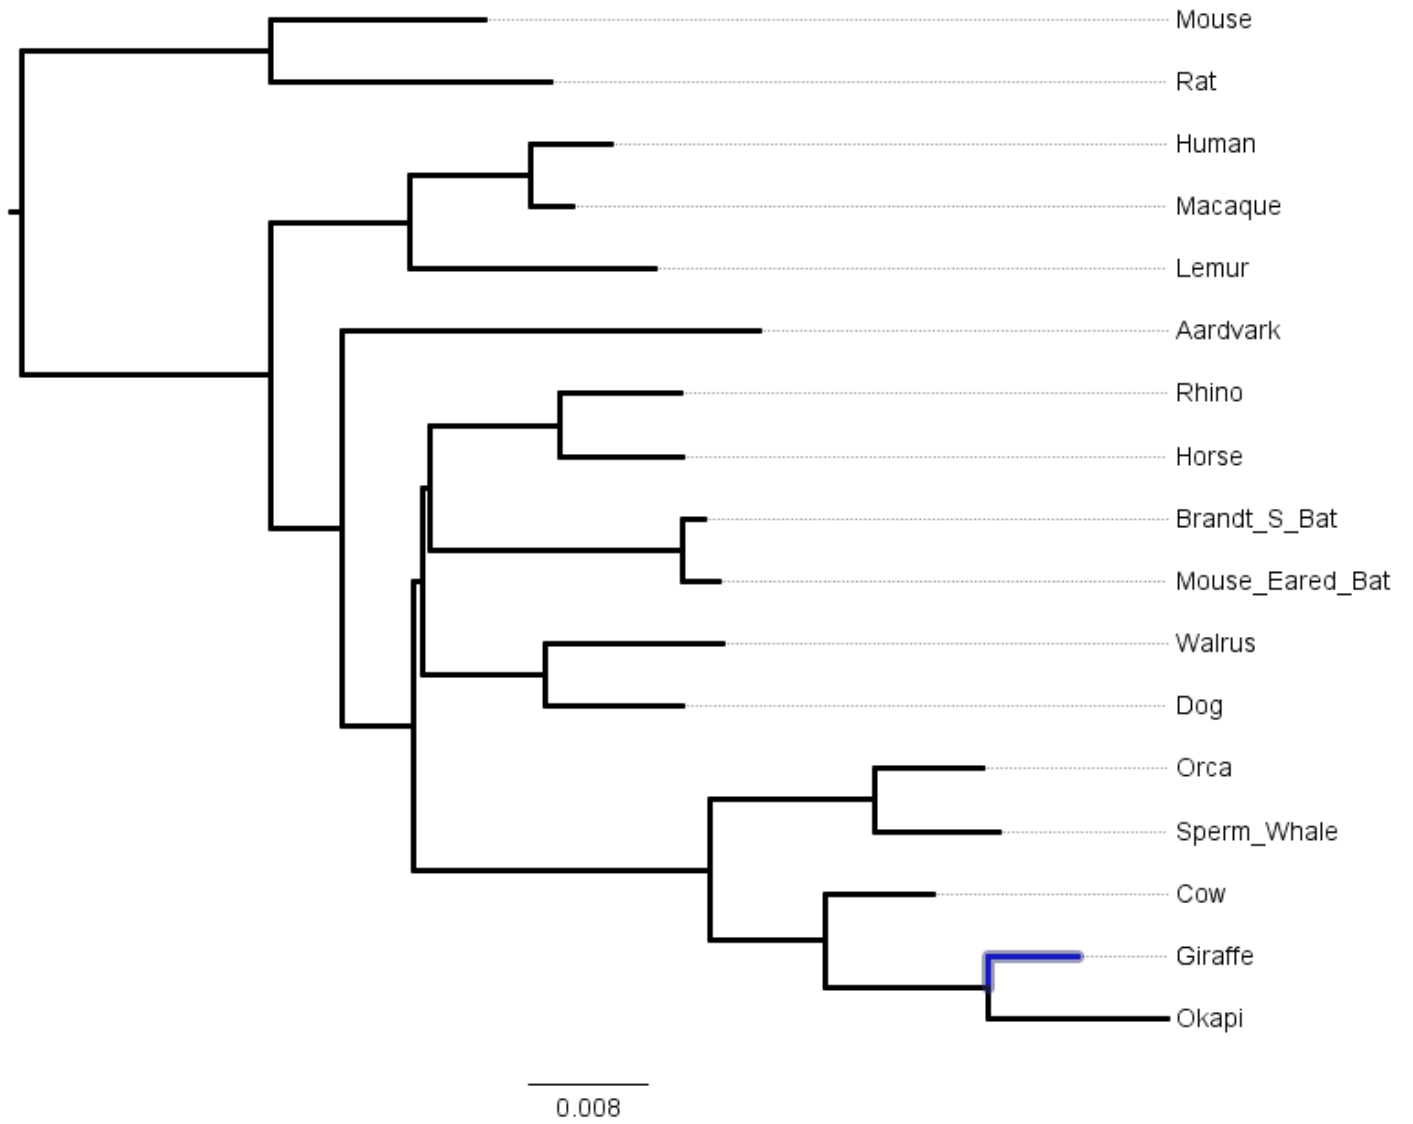

**Locus Name: Jumonji, AT Rich Interactive Domain 2 (JARID2)**

**Locus Name: 25-hydroxyvitamin D-1 alpha hydroxylase (CYP27B1)**

ENSBTAT00000022485 CYP27B1-201 25-hydroxyvitamin D-1 alpha hydroxylase bone development and calicium metabolism

mouse: hypocalcemia, hyperparathyroidism, growth retardation, rickets; human: ricketts

PSG (Giraffe) N353G

PP2: (Giraffe) G354N; (Giraffe/Okapi) S280F, P423L

Giraffe: R10K UIS, P33S UPS, R103C UPS, G354N UPS, V456I UPS

Giraffe/Okapi: V244I UPS, P423L UIS

**Protein sequence Alignment of Cow, Giraffe and Okapi CYP27B1**

|         |     |                                                                |     |
|---------|-----|----------------------------------------------------------------|-----|
| Cow     | 1   | MTQTLKFASRVFHRVRCPELGASLGRGSEAPRVLADIPGPSTPGFLAELFCKGGLSRL     | 60  |
| Giraffe | 1   | .....L..K.....D..S.....                                        | 60  |
| Okapi   | 1   | .....L.....T.....D.....                                        | 60  |
|         |     |                                                                |     |
| Cow     | 61  | HELQVQGAARFGPVWLASFQTVRTVYLAAPTLVEQLLRQEGPRPERCSFSPWTEHRRRRQ   | 120 |
| Giraffe | 61  | .....C.....A.....                                              | 120 |
| Okapi   | 61  | .....V.....                                                    | 120 |
|         |     |                                                                |     |
| Cow     | 121 | RACGLLTAEGEEWQRLRSLLAPLRLRPQAAARYAGTLHGVRDLVRRRLRRQRGLGAGPPS   | 180 |
| Giraffe | 121 | .....H.....A                                                   | 180 |
| Okapi   | 121 | .....A                                                         | 180 |
|         |     |                                                                |     |
| Cow     | 181 | LVRDVAGEFYKFGLEGIAAVLLGSRGCLAEVPPDTETTFIRAVGSVVFVSTLLTMAMPSW   | 240 |
| Giraffe | 181 | .....N.....N                                                   | 240 |
| Okapi   | 181 | .....N.....N                                                   | 240 |
|         |     |                                                                |     |
| Cow     | 241 | LHRVVPGPWDRLCRDWDQMFQFAFAQQHVEQREAEVAMRNQSEKSEEDMGPGAHLTYFLLQK | 300 |
| Giraffe | 241 | ...I.....S.FG.....RE                                           | 300 |
| Okapi   | 241 | ...IL.....I.....S.FG.....RE                                    | 300 |
|         |     |                                                                |     |
| Cow     | 301 | ELPAASILGNVTELLLAGVDTVSNTLSWALYELSRHPEIQTALHAEITAALGPGSSTQPS   | 360 |
| Giraffe | 301 | .....S.....N.....                                              | 360 |
| Okapi   | 301 | .....S.....                                                    | 360 |
|         |     |                                                                |     |
| Cow     | 361 | ATALSQPLLLKAVVKEVLRRLYPVVPNGNSRVPDRDICVGEYIIPKNTLVTLCHYATSRDEA | 420 |
| Giraffe | 361 | .....K.....D.....                                              | 420 |
| Okapi   | 361 | .....K.....D.....                                              | 420 |
|         |     |                                                                |     |
| Cow     | 421 | QFPEPNSFRPARWLGEQGPAPHPFASLPFGFGKRSCVGRRLAELELQMALAQILIHFEVQP  | 480 |
| Giraffe | 421 | ..L.....I.....N.....                                           | 480 |
| Okapi   | 421 | ..L.....M.....N.....                                           | 480 |
|         |     |                                                                |     |
| Cow     | 481 | EPGSAPVRPMTRTVLVPERSINLQFVDR                                   | 509 |
| Giraffe | 481 | .....                                                          | 509 |
| Okapi   | 481 | .....                                                          | 509 |

**Newick Tree of Mammalian CYP27B1**

(aadrvark:0.0375242, (elephant:0.0622914, ((macaque:0.0148826, (human:0.00896279, orangutan:0.00691122):0.0132665):0.0395558, (((((tiger:0.00238673, cat:0.00750471):0.0145471, ((polar\_bear:0.00899558, panda:0.016931):0.0163114, ferret:0.0316429):0.00178405, (Weddell\_seal:0.013333, walrus:0.0146166):0.0115555):0.00679621):0.00106311, dog:0.0497564):0.00952142, (mouse\_nose\_bat:0.0582708, (horse:0.0232685, rhino:0.0313728):0.0127407):0.0028444):0.00178531, (pig:0.0372145, ((alpaca:0.00313167, camel:0.00477359):0.0464589, ((minke\_whale:0.00783549, (bottle\_nose\_dolphin:0, orca:0.00599386):0.00475496, baiji\_dolphin:0.0253801):0.00416045):0.000529713, sperm\_whale:0.0114343):0.0188347, ((tibetan\_antelope:0.00404073, goat:0.00784087):0.00682575, ((yak:1.66149e-05, cow:0.00195383):0.0019791, water\_buffalo:0.00593403):0.00921975):0.0114662, (giraffe:0.0120963, okapi:0.00975338):0.0076539):0.0190941):0.00254586):0.00162077):0.00916863):0.00447796):0.00710974):0.0375242);

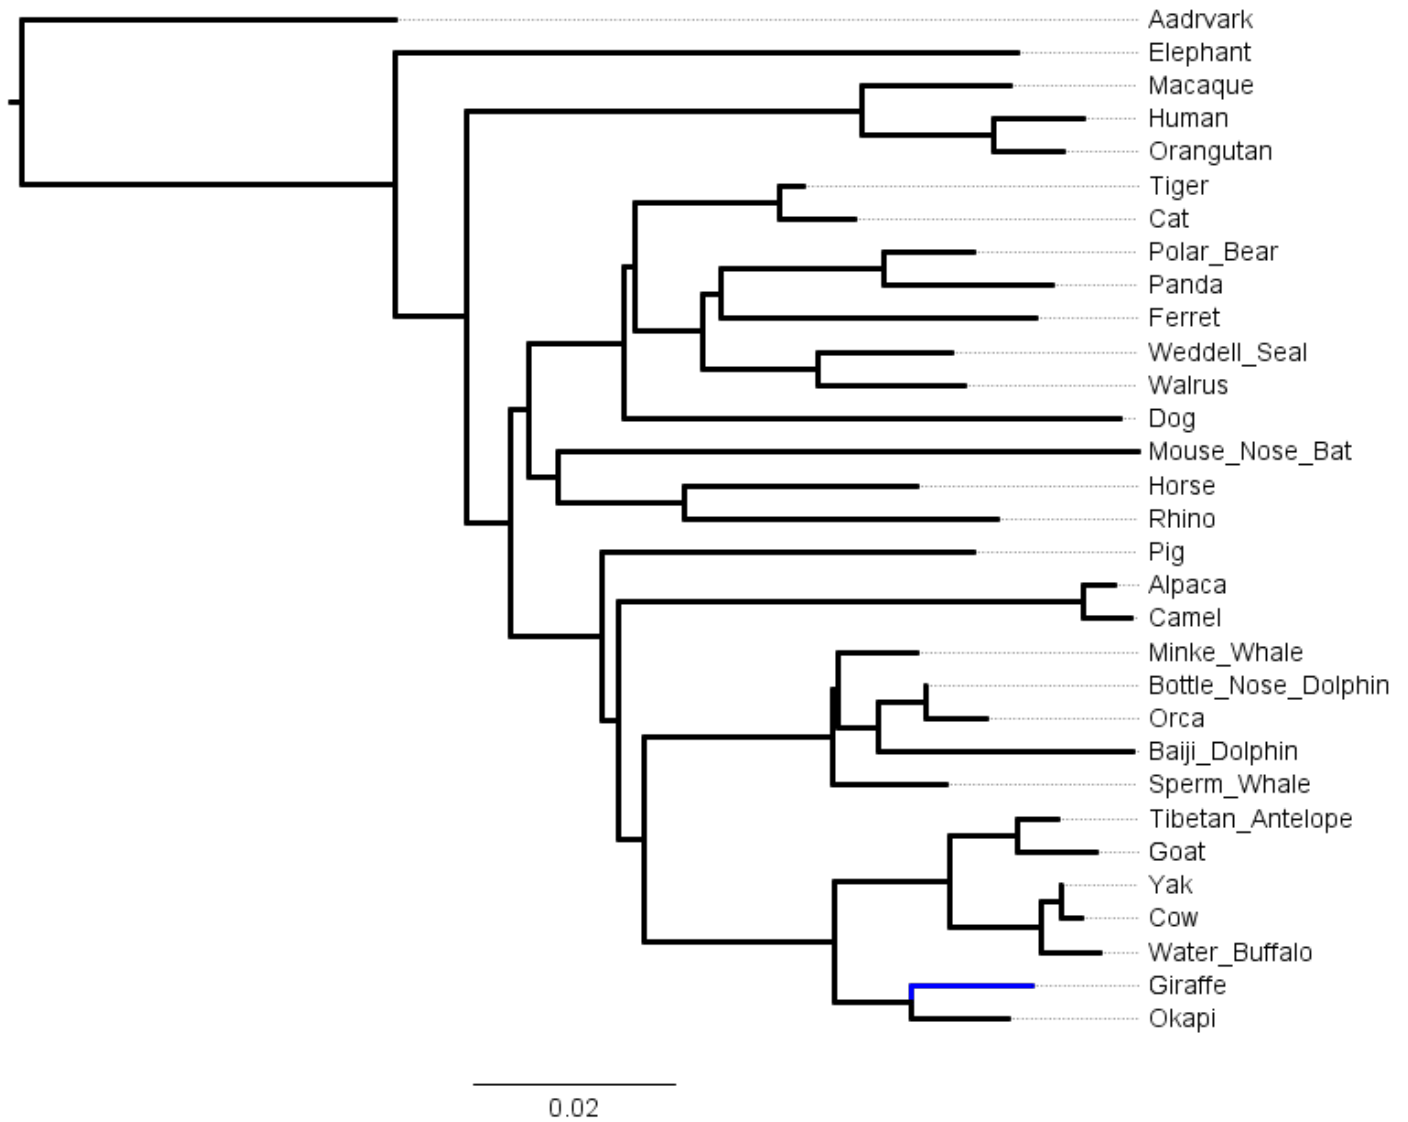

**Locus Name: 25-hydroxyvitamin D-1 alpha hydroxylase (CYP27B1)**

**Locus name: Calcipressin-3 (RCAN3)**

ENSBTAT0000023194 RCAN3-201 inhibits calcineurin A, binds troponin heart, brain, skeletal muscle, kidney, language SNP humans  
no mutations in m/h; highest expression in heart, skeletal muscle kidney, liver and peripheral blood leukocytes. GWAS human linked to reading ability.

PP2: (Giraffe) S177R, S203G, E204G, T205A

Giraffe: K177R UIS, S203G UIS, E204G UIS, T205A UIS, E206D UIS, E209A UIS, I218V UIS

**Protein sequence Alignment of Cow, Giraffe and Okapi RCAN3**

|         |     |                                                               |     |
|---------|-----|---------------------------------------------------------------|-----|
| Cow     | 1   | MLRDTMNSWNDSQSDLCSTDHEEEEEEMVFGENEDDLEEMMDLSDLPTSLFACRVHEAVFE | 60  |
| Giraffe | 1   | ....A.K.....I.....S.....                                      | 60  |
| Okapi   | 1   | ....A.K.....I.....S.....                                      | 60  |
|         |     |                                                               |     |
| Cow     | 61  | VPEQKERFEALFTIYDDQVTFQLFKSFRRVRINFSKPEAAARARIELHETDFNGRKLKLY  | 120 |
| Giraffe | 61  | .....                                                         | 120 |
| Okapi   | 61  | .....                                                         | 120 |
|         |     |                                                               |     |
| Cow     | 121 | FAQVQMSGETRDKSYLQPPQPAKQFLISPPASPPVGWKQGGDATPVINYDLLCAVSKLGP  | 180 |
| Giraffe | 121 | .....S.....E..M.....R...                                      | 180 |
| Okapi   | 121 | .....I.S.....E..M.....                                        | 180 |
|         |     |                                                               |     |
| Cow     | 181 | GEKYELHAGTESTPSVVVHVCESETEEEEEETKNPKQKITQTRRPEPPTAALSEPRAFDCA | 240 |
| Giraffe | 181 | .....GGAD..A.....V.....A.....                                 | 240 |
| Okapi   | 181 | .....A.....                                                   | 240 |
|         |     |                                                               |     |
| Cow     | 241 | L                                                             |     |
| Giraffe | 241 | .                                                             |     |
| Okapi   | 241 | .                                                             |     |

**Newick Tree of Mammalian RCAN3**

(alligator:0.0483704, ((orangutan:0.00770631, human:0.00482028):0.0231866, ((bush\_baby:0.0132982, manatee:0.0290937):0.00139181, (Philippine\_Tarsier:0.0295425, (((tiger:0.00911675, cat:0.00346237):0.019884, dog:0.00552053):0.0212035, (camel:0.0201789, rhino:0.0309182):0.00245174):0.00214144, (((baiji\_dolphin:0.0126797, sperm\_whale:0):0.000511953, minke\_whale:0.00787482):0.000597203, (orca:0.00375068, dolphin:0.0045828):0.0025521):0.0222505, ((giraffe:0.030299, okapi:0.0034659):0.00771831, (goat:0.000308341, tibetan\_Aatelope:0.00384968):0.0135723, (water\_buffalo:0.00470648, (cow:0.00421536, yak:0):0.00364454):0.00754964):0.00965143):0.0191975):0.00471539):0.00686056):0.00281634):0.00283215):0.0483704);

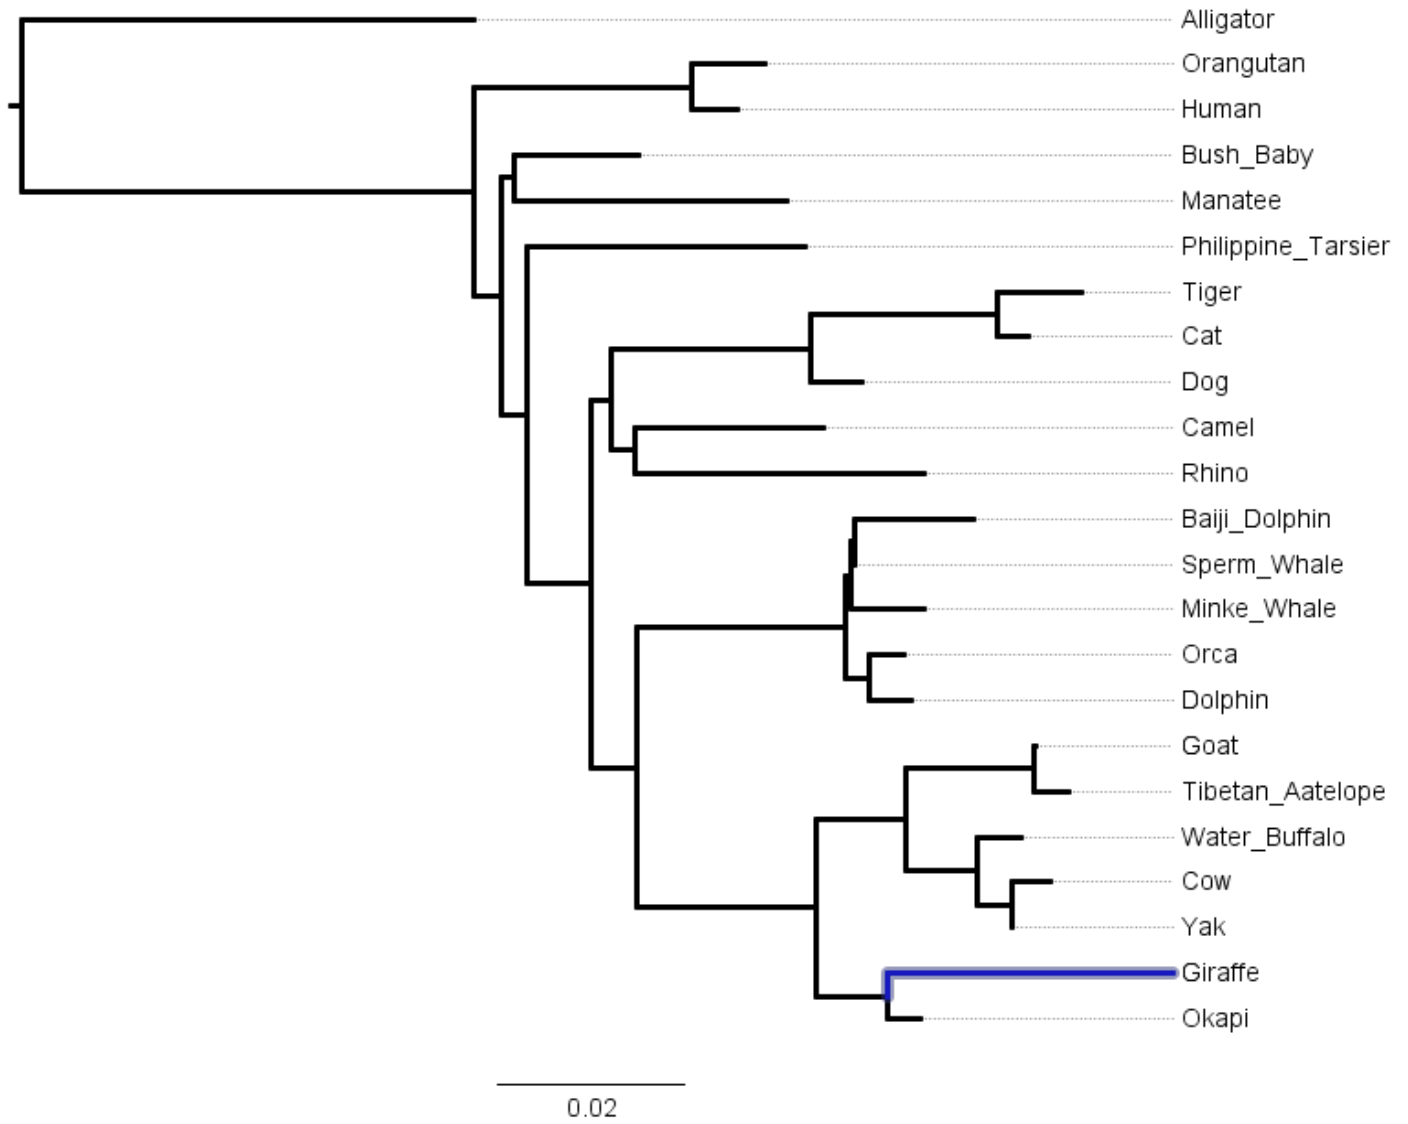

Locus name: Calcipressin-3 (RCAN3)



**Locus Name: CDC42 Effector Protein (Rho GTPase Binding) 2 (CDC42EP2; BORG1)**

ENSBTAT00000045518 CDC42EP2-201 rho GTPase inhibit CDC42 heart  
no mutations in m/h; highly expressed in heart

PSG: (Giraffe) F62L 0.932, Q74R 0.935, E80Q 0.937, P142L 0.933, T163P 0.931, A169T 0.933  
PP2: Giraffe, P142L

Giraffe: N49K UPS, F62L UIS, Q74E UPS, E80Q UPS, L163P UPS, A169T UPS  
Okapi: G78V UPS, T137A UPS

**Protein sequence Alignment of Cow, Giraffe and Okapi CDC42EP2**

|         |     |                                                              |     |
|---------|-----|--------------------------------------------------------------|-----|
| Cow     | 1   | MSTKVPIYLKRGSRKGGKKEKLRDLLSSDMISPLGDFRHTIHIGSGGGNDTFGDISFLQG | 60  |
| Giraffe | 1   | .....K.....                                                  | 60  |
| Okapi   | 1   | .....                                                        | 60  |
|         |     |                                                              |     |
| Cow     | 61  | KFHLLPGTAVDETQEDSGFEMPFQFTRTATLCGRELPDGPSPLLKNAISLPVIGGPQALT | 120 |
| Giraffe | 61  | .L.....AR.....Q.....                                         | 120 |
| Okapi   | 61  | .....A...V.....                                              | 120 |
|         |     |                                                              |     |
| Cow     | 121 | LPAAQAPPKPPRLHLETPQASPQEAGTVDVWRIPEAGAAHSELTTESGAEPPFLSHASSL | 180 |
| Giraffe | 121 | .....P.L.....V.....GP.P...T.....                             | 180 |
| Okapi   | 121 | .....A..S.....G..P.....                                      | 180 |
|         |     |                                                              |     |
| Cow     | 181 | LSLHVDLGPSILDDVLQIMDQDLGHLQIPT                               | 210 |
| Giraffe | 181 | .....                                                        | 210 |
| Okapi   | 181 | .....                                                        | 210 |

**Newick Tree of Mammalian CDC42EP2**

((mouse:0.0145936, rat:0.0283856):0.0262331, ((gpig:0.0159839, polecat:0.0278327):0.0258356, ((bushbaby:0.0366101, (baboon:0.00356704, (Macque:0.00548113, (chimp:0, human:0.00496303):0.00894311):0.00121776):0.0175749):0.00913156, (((giraffe:0.0348769, (okapi:0.0137486, ((tibantelope:0.00435601, gerenuk:0.00521358):0.00589585, (waterbuffalo:0.00656166, cow:0.0126709):0.00377406):0.00313783):0.00430068):0.03948, (spermwhale:0.00857386, (minke whale:0.00288067, orca:0.0112377):0.00324813):0.00395618):0.00592918, ((pigg:0, pig:0):0.0162874, (alpaca:0.00438069, camel:0.00980442):0.00761974):0.000994792):0.0175427, ((dog:0.026105, (tiger:0.0072252, cat:0.00689315):0.00494486):0.00250318, ((horse:0.00953455, rhino:0.0141094):0.00664547, (panda:0.0150295, walrus:0.00420301):0.00556832):0.00179352):0.00665173):0.00552213):0.00407209):0.0262331);

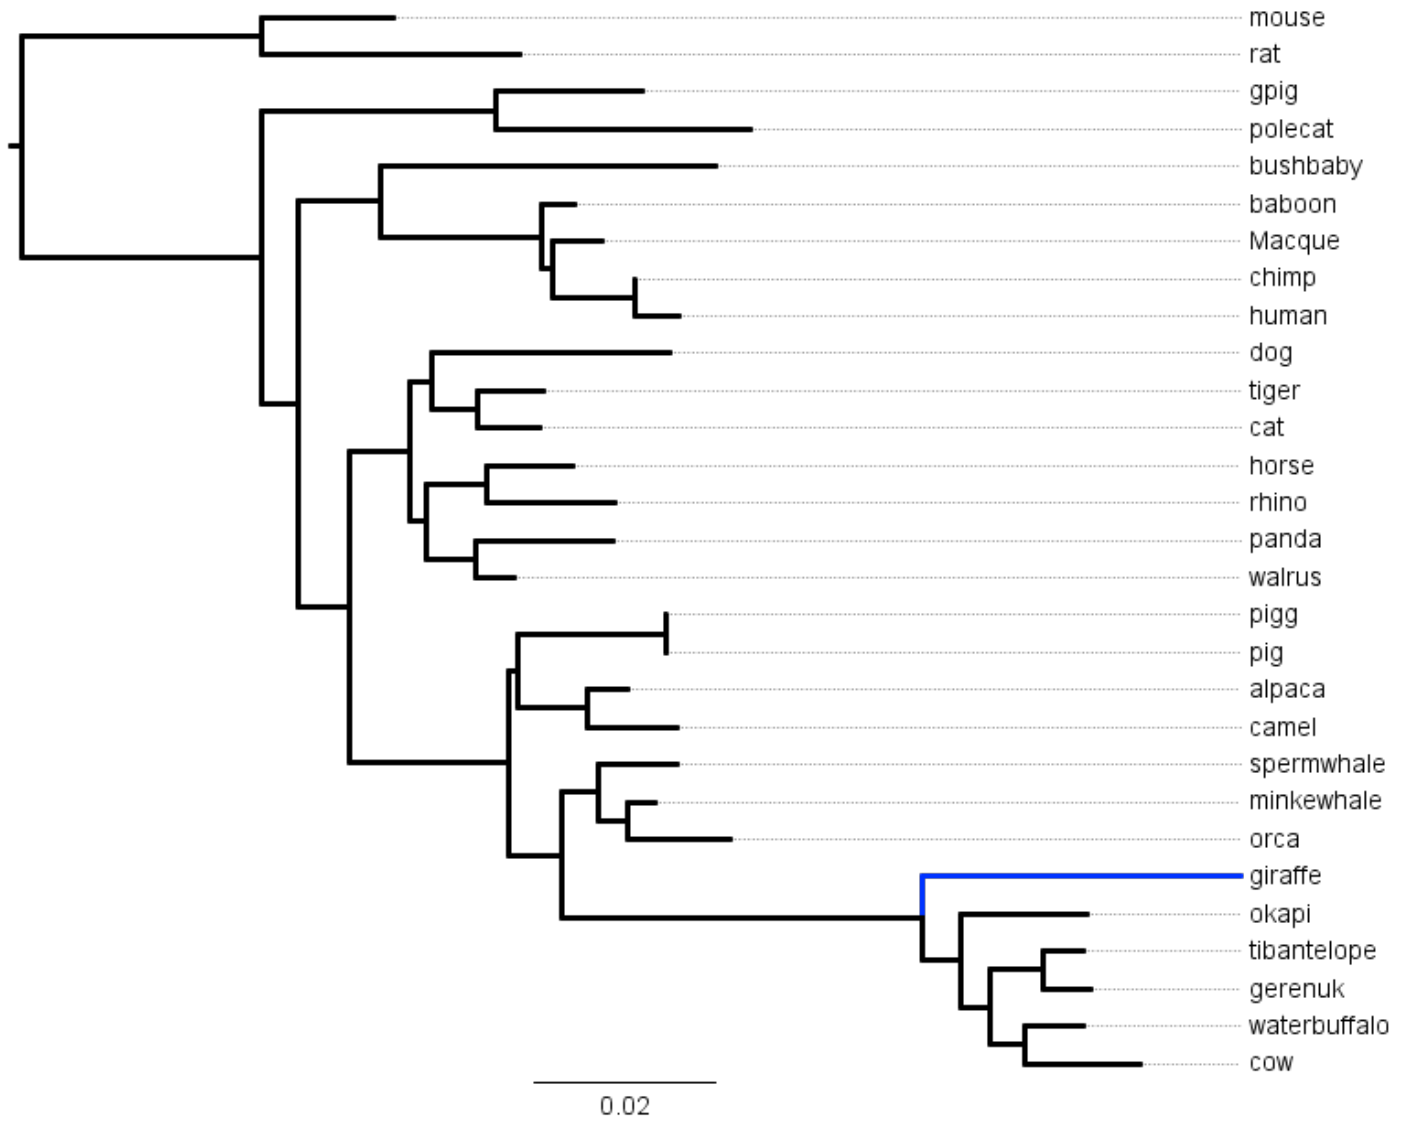

**Locus Name: CDC42 Effector Protein (Rho GTPase Binding) 2  
(CDC42EP2; BORG1)**

**Locus Name: Urotensin-2 (UTS2B)**

ENSBTAT00000061012 UTS2B-201 urotensin 2, vasoconstrictor regulates blood pressure in the brain  
no mutations in m/h described

PP2: (Giraffe) L81Q, L103V; (Okapi) L75V

Giraffe: L81Q UPS, S97F UIS, G102S UPS, L103V UPS  
Okapi: L75V UIS

**Protein sequence Alignment of Cow, Giraffe and Okapi UTS2B**

|         |    |                                                               |     |
|---------|----|---------------------------------------------------------------|-----|
| Cow     | 1  | MNVILSTTLSFGLLTLLSVMIFLESVHGVYPYFVQGNELLPDKEDADGEELLLALLNKNFG | 60  |
| Giraffe | 1  | .....C.....L...I.....T.....                                   | 60  |
| Okapi   | 1  | .....C.....F.....L...I.....T.....                             | 60  |
|         |    |                                                               |     |
| Cow     | 61 | FQRPSNIDIELADKLEELNQLEKLKEQLMEAKDAEMSYAIDGLSSSHPNKRACFWKYCV   | 119 |
| Giraffe | 61 | .....N.....Q.....F....SV.....                                 | 119 |
| Okapi   | 61 | .....N.V.....I.....                                           | 119 |

**Newick Tree of Mammalian UTS2B**

(rat:0.224501, ((horse:0.102568, rhino:0.0521938):0.0121468, (((weddel\_seal:0.0276724, walrus:0.0517476):0.0163016, panda:0.0510553):0.0126691, (((dog:0.0744576, bushbaby:0.208502):0.0216221, (polecat:0.115453, tiger:0.107241):0.0275348, (human:0.0317029, baboon:0.00266853, rhesus\_monkey:0.0144267):0.0484187):0.128325):0.00521252):0.00442636, ((rabbit:0.16054, manatee:0.233692):0.0177839, (pig:0.0880933, camel:0.107285):0.0154182, ((sperm\_whale:0, baiji\_dolphin:0, (orca:0.00849078, dolphin:0.00860448):0.0177554):0.0176492):0.00426715, minke\_whale:0.0131005):0.00867836, ((water\_buffalo:0.00838915, cow:0.0258089):0.0163519, (giraffe:0.0358681, (okapi:0.0206776, (sheep:0.00905644, tibetan\_antelope:0.018346):0.00470059, goat:0.0230067):0.0310677):0.00427655):0.000482062):0.0319728):0.0211113):0.0108759):0.00849987):0.00778032):0.0170439):0.224501);

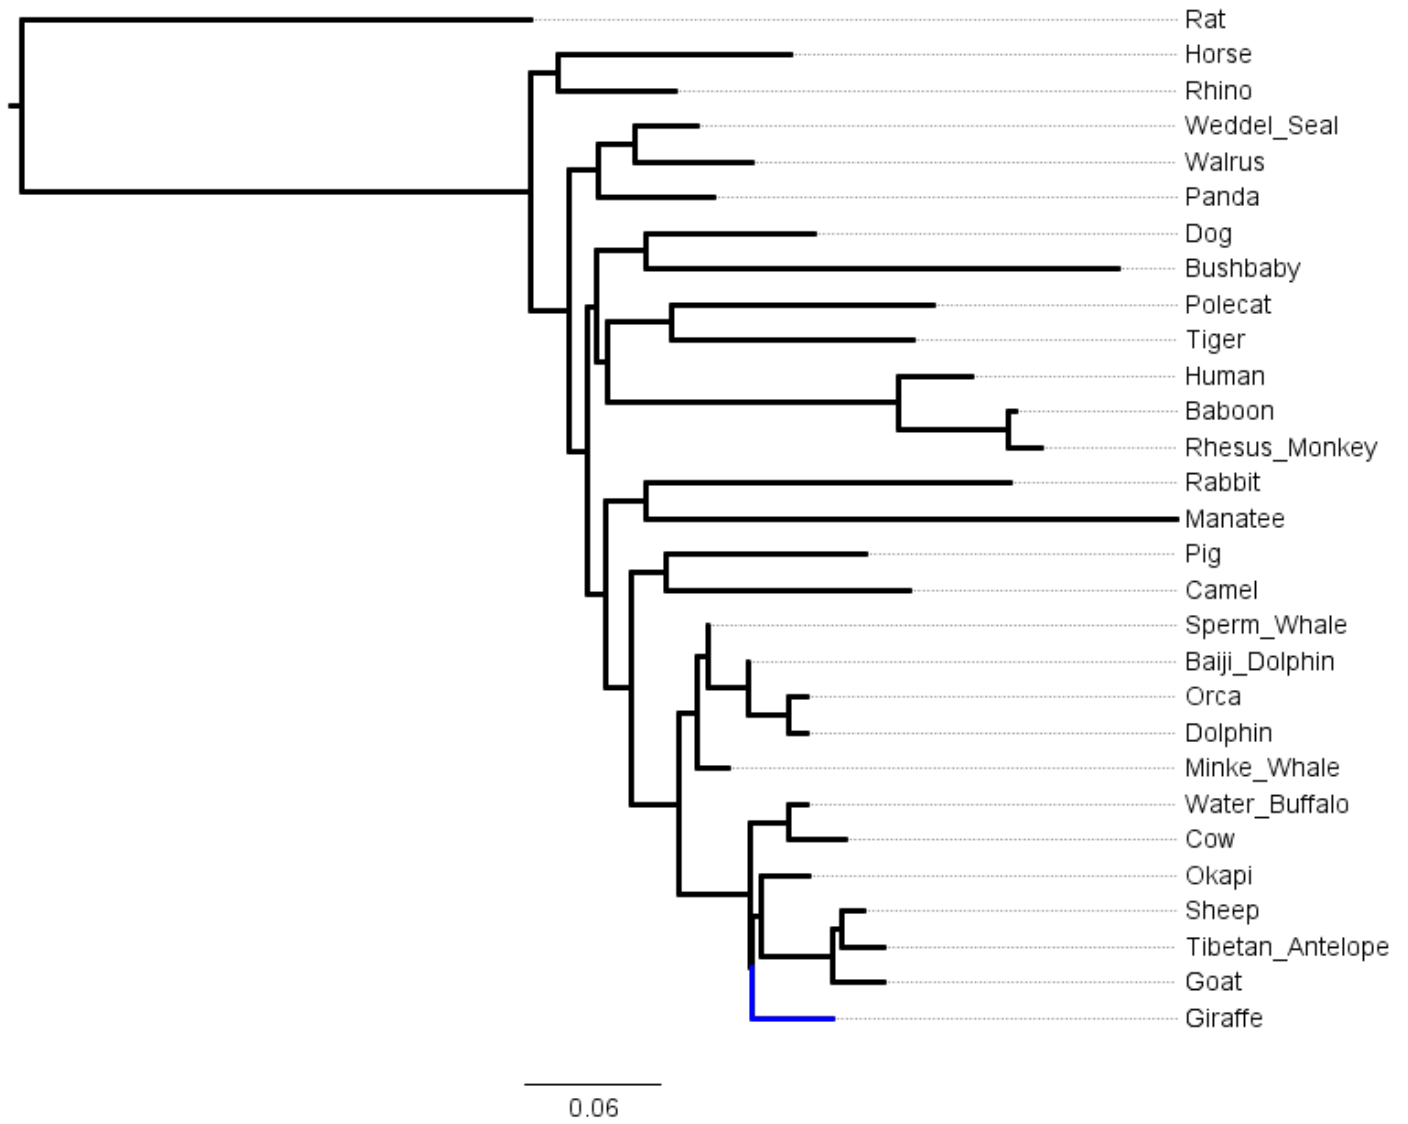

**Locus Name: Urotensin-2 (UTS2B)**

**Locus Name:** Alpha 1 Adrenergic Receptor **ADRA1A**

ENSBTAT0000044849 ADRA1A-201 adrenergic receptor regulation of blood pressure  
 mouse: hypotension in mouse KO

PP2: (Giraffe) A422S  
 PSG: (Giraffe) A422S  
 Giraffe: A422S UIS

**Protein sequence Alignment of Cow, Giraffe and Okapi ADRA1A**

|         |     |                                                               |     |
|---------|-----|---------------------------------------------------------------|-----|
| Cow     | 1   | MVFLSGNASDSSNCTHPPPPVNISKAILLGVILGGLILFGVLGNILVILSVACHRHLSV   | 60  |
| Giraffe | 1   | .....                                                         | 60  |
| Okapi   | 1   | .....                                                         | 60  |
|         |     |                                                               |     |
| Cow     | 61  | THYYIVNLAVADLLLTSTVLPFSAIFEILGYWAFGRVFCNVWAAVDVLCCTASIMGLCII  | 120 |
| Giraffe | 61  | .....                                                         | 120 |
| Okapi   | 61  | .....                                                         | 120 |
|         |     |                                                               |     |
| Cow     | 121 | SIDRYIGVSYPLRYPTIVTQKRLMALLCVWALSLSVISIGPLFGWRQPAPEDETICQINE  | 180 |
| Giraffe | 121 | .....                                                         | 180 |
| Okapi   | 121 | .....                                                         | 180 |
|         |     |                                                               |     |
| Cow     | 181 | EPGYVLFSAALGSFYVPLTIILVMYCRVYVVAKRERGLKSLKTDKSDSEQVTLRIHRKN   | 240 |
| Giraffe | 181 | .....                                                         | 240 |
| Okapi   | 181 | .....                                                         | 240 |
|         |     |                                                               |     |
| Cow     | 241 | AQVGGSGVTSANKKTHFSVRLKFSREKKAATLGIVVGCFLCWLPPFLVMPIGSFFPD     | 300 |
| Giraffe | 241 | .P.....N.....                                                 | 300 |
| Okapi   | 241 | .A.....N.....                                                 | 300 |
|         |     |                                                               |     |
| Cow     | 301 | FRPSETVFKIAFWLGYLNSCINPIIYPCSSQEFKAFQNVLRIQCLRRKQSSKHTLGYTL   | 360 |
| Giraffe | 301 | .....                                                         | 360 |
| Okapi   | 301 | .....                                                         | 360 |
|         |     |                                                               |     |
| Cow     | 361 | HAPSHVLEGQHKDLVRI PVGSAETFYKISKTDGVCEWKIFSSLPRGSARMAVARDPSACT | 420 |
| Giraffe | 361 | ....A.....                                                    | 420 |
| Okapi   | 361 | ....A.....L.....                                              | 420 |
|         |     |                                                               |     |
| Cow     | 421 | TARVRSKSFQVCCCLGPSTPSRGENHQIPTIKIHTISLSENGEEV                 | 467 |
| Giraffe | 421 | .S.....                                                       | 467 |
| Okapi   | 421 | .....                                                         | 467 |

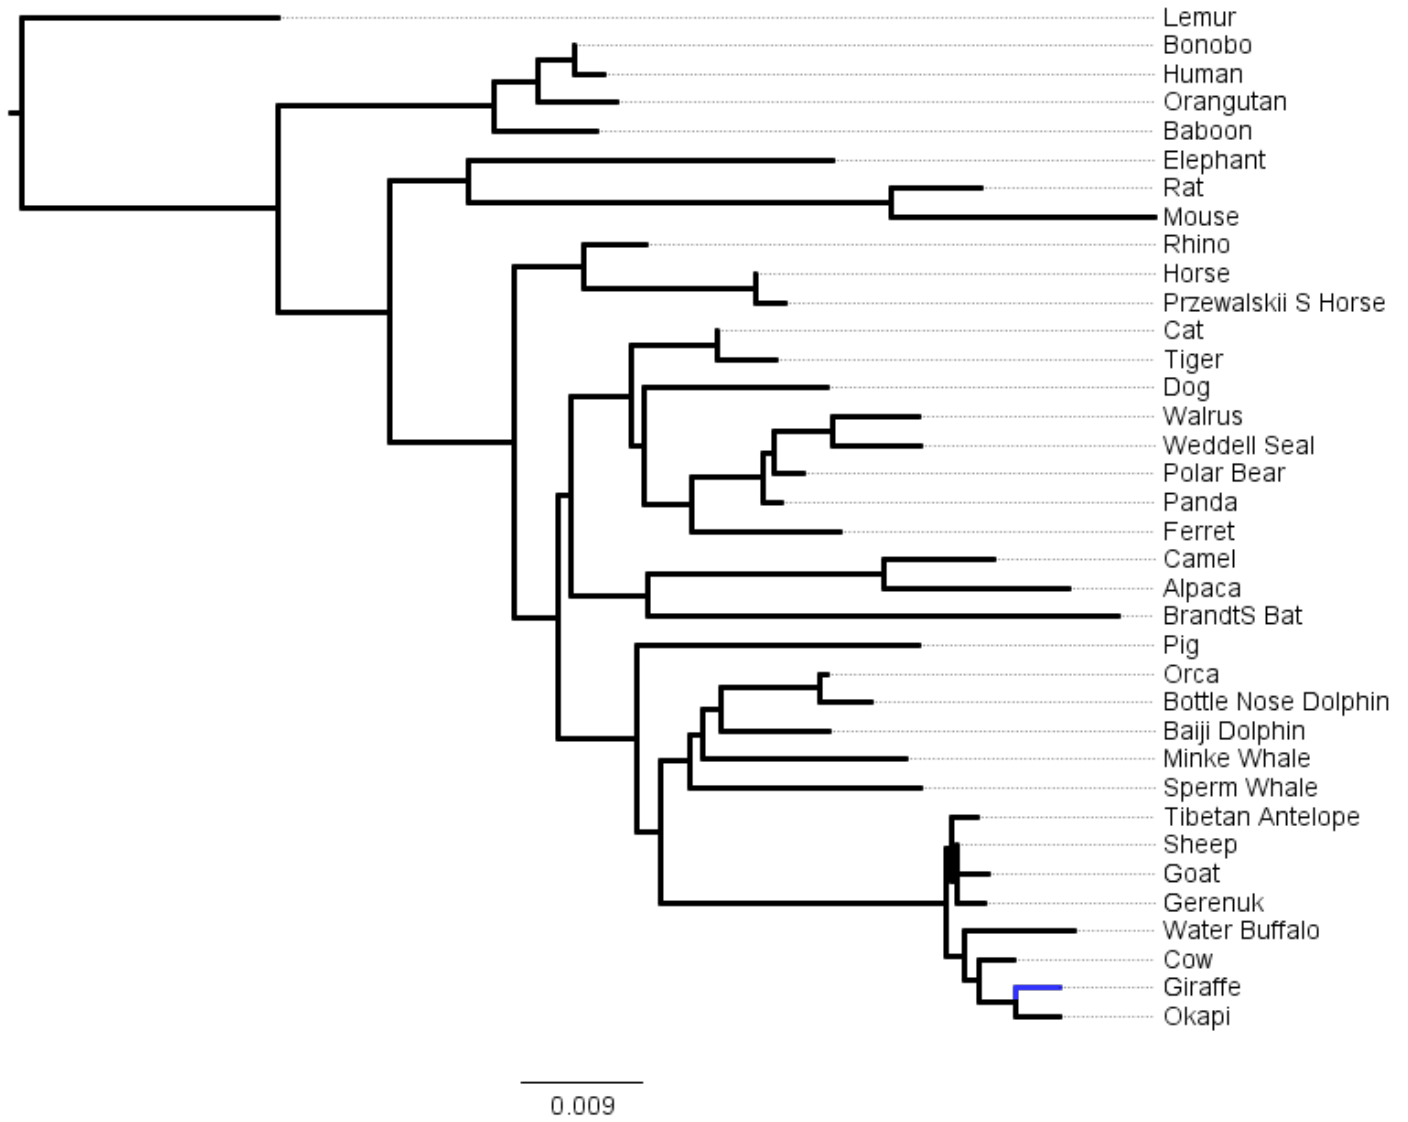

**Locus Name:** Alpha 1 Adrenergic Receptor **ADRA1A**

**Locus Name: Alpha-2B adrenergic receptor (ADRA2B)**

ENSBTAT00000012514 ADRA2B-201 adrenergic receptor regulation of vasoconstriction  
 mouse: Homozygous null mice exhibit poor survival and breeding, lack the vasoconstrictor response  
 to alpha2-adrenergic receptor agonists, and display background strain dependent postnatal  
 respiratory failure. human: emotional stress response

PP2: S332G

Giraffe: P267R UPS, A317V UIS, G329S UPS, R331Q UIS, G347A UIS, A349V UPS, H402Y UPS  
 Giraffe/Okapi: A314S UPS, V400A UIS

**Protein sequence Alignment of Cow, Giraffe and Okapi ADRA2B**

|         |     |                                                              |     |
|---------|-----|--------------------------------------------------------------|-----|
| Cow     | 1   | MDHQEPYSVQATAAIAAVITFLILFTIFGNALVILAVLTSRSLRAPQNLFLVSLAAADIL | 60  |
| Giraffe | 1   | .....                                                        | 60  |
| Okapi   | 1   | .....                                                        | 60  |
|         |     |                                                              |     |
| Cow     | 61  | VATLIIPFSLANELLGWYFWRTWCEVYLALDVLFTSSIVHLCAISLDRYWAVSRALEY   | 120 |
| Giraffe | 61  | .....A.....                                                  | 120 |
| Okapi   | 61  | .....A.....                                                  | 120 |
|         |     |                                                              |     |
| Cow     | 121 | NSKRTPRRIKFIILIVWLIAAVISLPLLIYKGDQGPPLARPQCKLNQEAWYILASSIGS  | 180 |
| Giraffe | 121 | .....                                                        | 180 |
| Okapi   | 121 | .....                                                        | 180 |
|         |     |                                                              |     |
| Cow     | 181 | FFAPCLIMILVYLRIYLIAKRSHCRGPRAKGGPGERESKQPHVPGEVSDSAKLPTLASQ  | 240 |
| Giraffe | 181 | .....AR.....                                                 | 240 |
| Okapi   | 181 | .....AR.....                                                 | 240 |
|         |     |                                                              |     |
| Cow     | 241 | LATPGEANGCSQPRPGEKGDGETPEAPGTFALPPSWPAIPKSGQGQKEGVCGSSPEEEAE | 300 |
| Giraffe | 241 | .....H.....E.....DR.....N.....                               | 300 |
| Okapi   | 241 | .....E.....D.....N.....                                      | 300 |
|         |     |                                                              |     |
| Cow     | 301 | EEEEEGCEPQALPASPASACSPPLQQPQGSRVLATLRGQVLLGRGTGTAGAQQWRRRTQL | 360 |
| Giraffe | 301 | .....S.....S..V.....P...S.Q.....A.V.....                     | 360 |
| Okapi   | 301 | .....S.....P.....                                            | 360 |
|         |     |                                                              |     |
| Cow     | 361 | SREKRFTFVLAVVIGVFVLCWFPFFFSYSLGAICPQHCKVPHGLFQFFFWIGYCNSLNP  | 420 |
| Giraffe | 361 | .....A.Y.....                                                | 420 |
| Okapi   | 361 | .....A.....                                                  | 420 |
|         |     |                                                              |     |
| Cow     | 421 | VIYTVFNQDFRRAFRRILCREWTQTAW                                  | 447 |
| Giraffe | 421 | ....I.....Q.....                                             | 447 |
| Okapi   | 421 | ....I.....Q.....                                             | 447 |

**Newick Tree of Mammalian ADRA2B**

```
((Rat:0.0104148, Mouse:0.0213392):0.0511955, ((Human:0.00598824,
Orangutan:0.00979629):0.00481354, (Baboon:0.00215937,
Rhesus_Monkey:0.00687016):0.00947309):0.0377786, ((Cat:0.00489578, Tiger:0.00191474):0.0156221,
(Dog:0.0278336, Weddel_Seal:0.0136589):0.00306395):0.00838064, (Horse:0.0347292, (Pig:0.0199742,
(Camel:0.00859486, Alpaca:0.00715415):0.0274931):0.00686307, (Minke_Whale:0.0120515,
((Orca:0.0115844, Dolphin:0.00647579):0.0118757, Sperm_Whale:0.00637478):0.00508485):0.0189107,
(((Goat:0.00286248, Mouflonsheep:0.00838647):0.00671911, Tibetan_Antelope:0.0171775):0.00965908,
(Water_Buffalo:0.0131733, (Cow:0.00079359, Yak:0.00594049):0.00723812):0.00074093):0.0027817,
(Giraffe:0.0186536,
Okapi:0.00168747):0.0131997):0.0309802):0.00707524):0.00643335):0.00381393):0.00454996):0.0511955
);
```

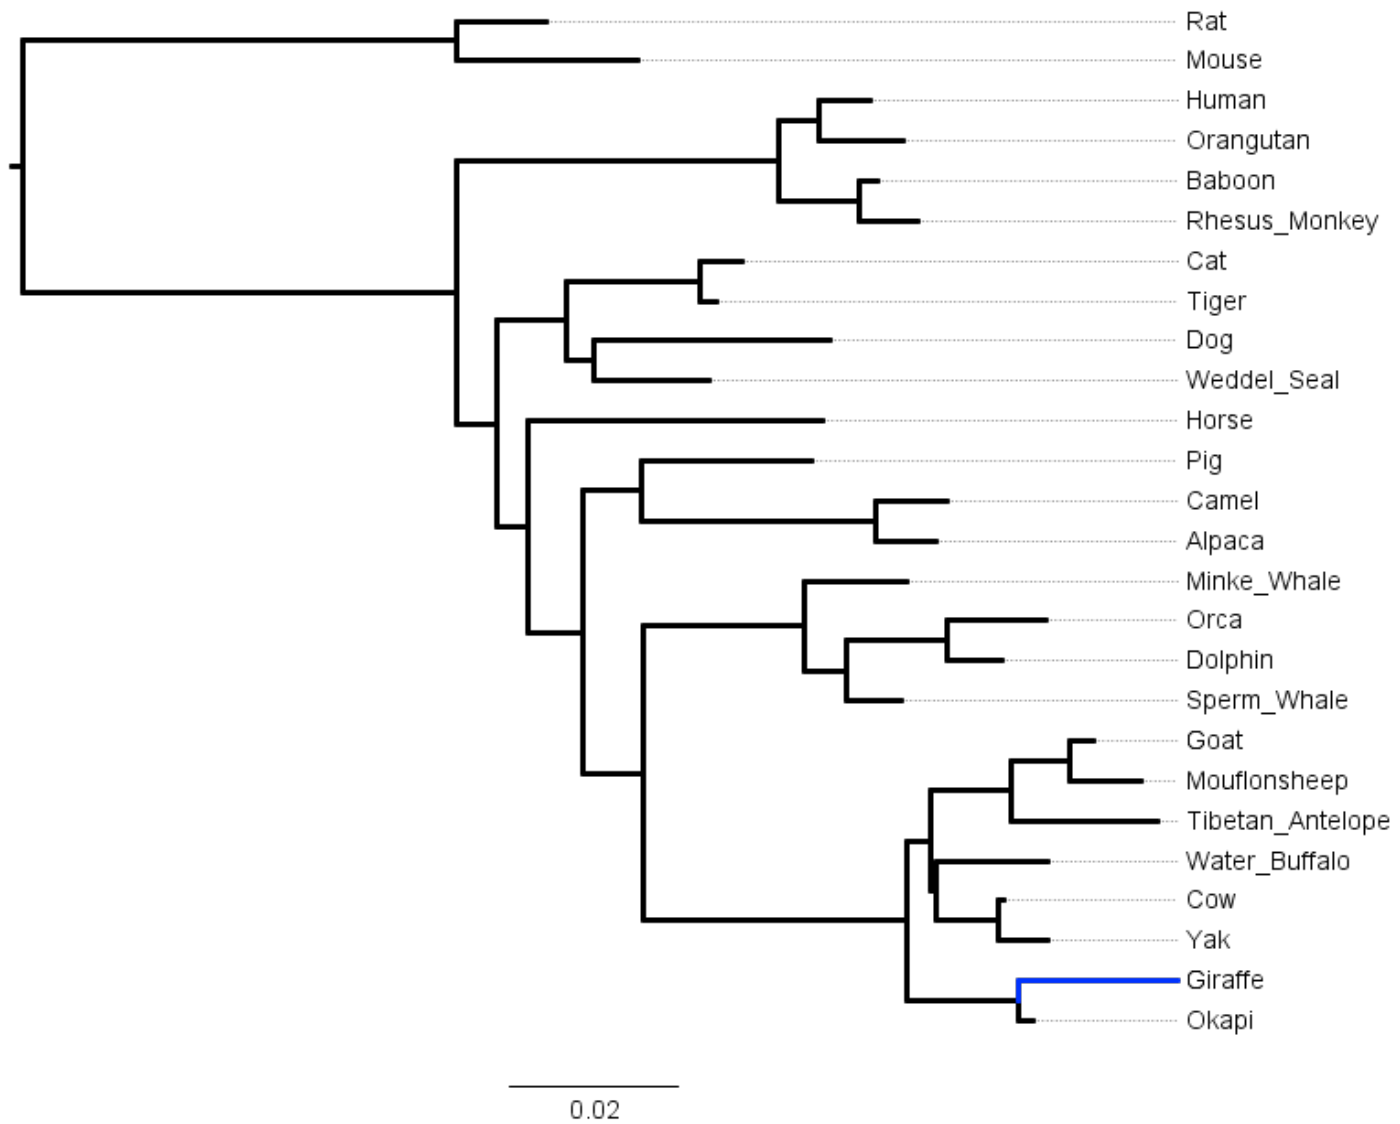

**Locus Name: Alpha-2B adrenergic receptor (ADRA2B)**



**Locus name:** Angiotensin converting enzyme (**ACE**)

ENSBTAT00000061106 ACE-201           angiotensin I converting enzyme           regulation of blood pressure  
mouse: reduced systemic blood pressure, normocytic anemia, renal abnormalities, inability to  
concentrate urine, and reduced male fertility

PP2: (Giraffe) W628G, R1242H;   (Giraffe/Okapi) P405H;   (Okapi) H861P

Giraffe: W628G UIS, A insertion 1045 UIS, R1242H UIS

Giraffe/Okapi: R242S UPS, T563P UPS, PDV866-888AEL UIS, P1151S UIS, (GP.V..GR)1235-1247(ST.Q..SH)  
UIS, S1287G UPS

**Protein sequence Alignment of Cow, Giraffe and Okapi ACE**

|         |     |                                                               |     |
|---------|-----|---------------------------------------------------------------|-----|
| Cow     | 1   | MGAASGRRSPPLLLPLLLLLLPPPPVILELDPALQPGNFPADEAGAQIFAASFNSSAEQV  | 60  |
| Giraffe | 1   | .....W.....V.....D.....                                       | 60  |
| Okapi   | 1   | .....W.....V.....D.....                                       | 60  |
|         |     |                                                               |     |
| Cow     | 61  | LFQSTAASWAHDTNITEENARLQEEAALLSQEFSEAWGQKAKDLDFPVWQNFDTPTLLRI  | 120 |
| Giraffe | 61  | .....R.....I.....                                             | 120 |
| Okapi   | 61  | .....R.....N...I.....                                         | 120 |
|         |     |                                                               |     |
| Cow     | 121 | IGAVRTLGPANLDLEKRQKYNLLSNMSRIYSTAKVCFPNKTAPCWSLDPELTNILASSR   | 180 |
| Giraffe | 121 | .....V.....                                                   | 180 |
| Okapi   | 121 | .....V.....                                                   | 180 |
|         |     |                                                               |     |
| Cow     | 181 | SYTLLLYAWEGWHNAAGIPLKPLYQDFTALSNEAYKQDGFSDTGAYWRSWYDSPTFTEDL  | 240 |
| Giraffe | 181 | ..A.....R.....                                                | 240 |
| Okapi   | 181 | ..A.....                                                      | 240 |
|         |     |                                                               |     |
| Cow     | 241 | ERLYQQLEPLYLNLHAYVRRALHRRYGDYINLRGPIPAHLLGNMWAQSWENIYDTVVVF   | 300 |
| Giraffe | 241 | .S.....Y....K.....M....                                       | 300 |
| Okapi   | 241 | .S.....T.Y.....M....                                          | 300 |
|         |     |                                                               |     |
| Cow     | 301 | PDKPNLDVTDVMVQKGNATHMFRVAEEFFTSLGLLPMPPEFWAESMLEKPSDGREVVCH   | 360 |
| Giraffe | 301 | .....ST.....                                                  | 360 |
| Okapi   | 301 | .....ST.....                                                  | 360 |
|         |     |                                                               |     |
| Cow     | 361 | ASAWDFYNRKDFRIKQCTRVMTDQLSTVHHEMGHVQYYLQYKGQHVSLRRGANPGFHEAI  | 420 |
| Giraffe | 361 | .....D.....                                                   | 420 |
| Okapi   | 361 | .....D.....                                                   | 420 |
|         |     |                                                               |     |
| Cow     | 421 | GDVLALSVESTPAHLHKIGLLDQVTNDTESDINYLKMALEKIAFLPFGYLVDQWRWGVFS  | 480 |
| Giraffe | 421 | .....                                                         | 480 |
| Okapi   | 421 | .....                                                         | 480 |
|         |     |                                                               |     |
| Cow     | 481 | GRTPPSRYNNDWYLRTRYQGICPPVVRNETHFDAGAKFHVPNVTPYIRYFVSVFLQFQF   | 540 |
| Giraffe | 481 | .....L.....                                                   | 540 |
| Okapi   | 481 | .....L.....                                                   | 540 |
|         |     |                                                               |     |
| Cow     | 541 | HEALCKEAGHQGPLHQCDIYQSTQAGAKLRALLQAGSSRPWQEVLDKDMVGSNDLDRPLL  | 600 |
| Giraffe | 541 | .....P.....                                                   | 600 |
| Okapi   | 541 | .....P.....                                                   | 600 |
|         |     |                                                               |     |
| Cow     | 601 | SYFQPVTQWLEEQNQNGEVLGWPEYQWRPMPDNYPEGIDLVSDEDEARKFVEEYDRRS    | 660 |
| Giraffe | 601 | .....G.....S.....                                             | 660 |
| Okapi   | 601 | .....Q.....N.....                                             | 660 |
|         |     |                                                               |     |
| Cow     | 661 | QVVWNEYAEANWNYSTDISTDNSKLLMEKNLQMANHTVKYGTWARKFDVTNFQATMKRM   | 720 |
| Giraffe | 661 | .....N.N.....K.....                                           | 720 |
| Okapi   | 661 | .....N.N.....K.....                                           | 720 |
|         |     |                                                               |     |
| Cow     | 721 | IKKIQDLERAALPTKELEEYNQILLDMETVYSVASVCHENGTCRLRLEPDLTNLMATSRNY | 780 |
| Giraffe | 721 | .....V.....M....K....Q....K....S.                             | 780 |
| Okapi   | 721 | .....V.....K.....K.....S.                                     | 780 |
|         |     |                                                               |     |
| Cow     | 781 | QDLAWAWKSWRDKVGRSILPYFPKYVELTNKAARLNGYQDGGDSWRSMYEMPFLLEELEQ  | 840 |
| Giraffe | 781 | .....V.....F.....T.....                                       | 840 |
| Okapi   | 781 | .....V.....F.....T.....                                       | 840 |

|         |      |                                                                |      |
|---------|------|----------------------------------------------------------------|------|
| Cow     | 841  | LFQELQPLYLNLHAYVRRALHRHYGPDVINLEGPIPAHLLGNMWAQSWSNYDLVAPFPS    | 900  |
| Giraffe | 841  | .....AEL.....                                                  | 900  |
| Okapi   | 841  | .....P.....AEL.....                                            | 900  |
| Cow     | 901  | APKMDATEAMIKQGWTPLRMFKEADNFFTSLGLLPMPPEFWNKSMLEKPTDGREVVCHAS   | 960  |
| Giraffe | 901  | .....                                                          | 960  |
| Okapi   | 901  | .....                                                          | 960  |
| Cow     | 961  | AWDFFNKGDFRIKQCTSVNMEDLVVAHHEMIGHIQYFMQYKDLPVTFREGANPGFHEAIGD  | 1020 |
| Giraffe | 961  | .....                                                          | 1020 |
| Okapi   | 961  | .....                                                          | 1020 |
| Cow     | 1021 | VLALSVESTPHLHKINLLSSGDDGYEEDINFLMKMALEKIAFIPIFVDFLVDQWRWRVFDGS | 1080 |
| Giraffe | 1021 | .....D.....                                                    | 1081 |
| Okapi   | 1021 | .....D.....                                                    | 1080 |
| Cow     | 1081 | VTRENYNQEWWSLRLKYQGVCPPLARSQDDDFDPGAKFHIPASVPYVRYFVSFVIQFQFHQ  | 1140 |
| Giraffe | 1082 | .....V.....                                                    | 1141 |
| Okapi   | 1081 | .....V.....                                                    | 1140 |
| Cow     | 1141 | ALCQAAGHQGPLHKCDIYQSKEAGKLLADAMKLGFSQPWPEAMRLITGQSNMSAAAMMTY   | 1200 |
| Giraffe | 1142 | .....S.....                                                    | 1201 |
| Okapi   | 1141 | .....S.....                                                    | 1200 |
| Cow     | 1201 | FKPLLDWLVTENGRHEKLGWPQYNWTPNSARLEGPFVGSGRVNFGLNLEEQQARVGQW     | 1260 |
| Giraffe | 1202 | .....E.....ST.Q..SH.....                                       | 1261 |
| Okapi   | 1201 | .....E.....ST.Q..S.....                                        | 1260 |
| Cow     | 1261 | VLLFLGVALLVATLGLTQRLFSIRHHSLRRPHRGPQFGSEVELRHS                 | 1306 |
| Giraffe | 1262 | .....G.....H.....                                              | 1307 |
| Okapi   | 1261 | .....G.....H.....                                              | 1306 |

#### Newick Tree of Mammalian ACE

```
(Elephantulus_edwardii:0.0411946, (elephant:0.0704335, (((human:0.0120756,
(orangutan:0.00370523, macaque:0.015684):0.00825184):0.0565632, lemur:0.06645):0.00623678,
(rat:0.0281724, mouse:0.0361543):0.0652831):0.00574888, ((horse:0.0444316, (dog:0.0164191,
(walrus:0.00850943, Weddell_seal:0.0130814):0.0109381):0.0501477):0.00829452, ((pig:0.0635755,
camel:0.058586):0.00494567, (((orca:0.00252518, bottle_nose_dolphin:0.0121079):0.0144663,
baiji_dolphin:0.0248234):0.0121141, sperm_whale:0.0311566):0.0161918, ((yak:0, (cow:0.00327061,
water_buffalo:0.00518782):0.00377227):0.00640482, (tibetan_antelope:0.023739, (sheep:0.0060831,
goat:0.0188735):0.0480138):0.0306322):0.00449784, (giraffe:0.00558065,
okapi:0.00365032):0.0180445):0.0371664):0.00510038):0.017292):0.00969575):0.0150436):0.0411946);
```

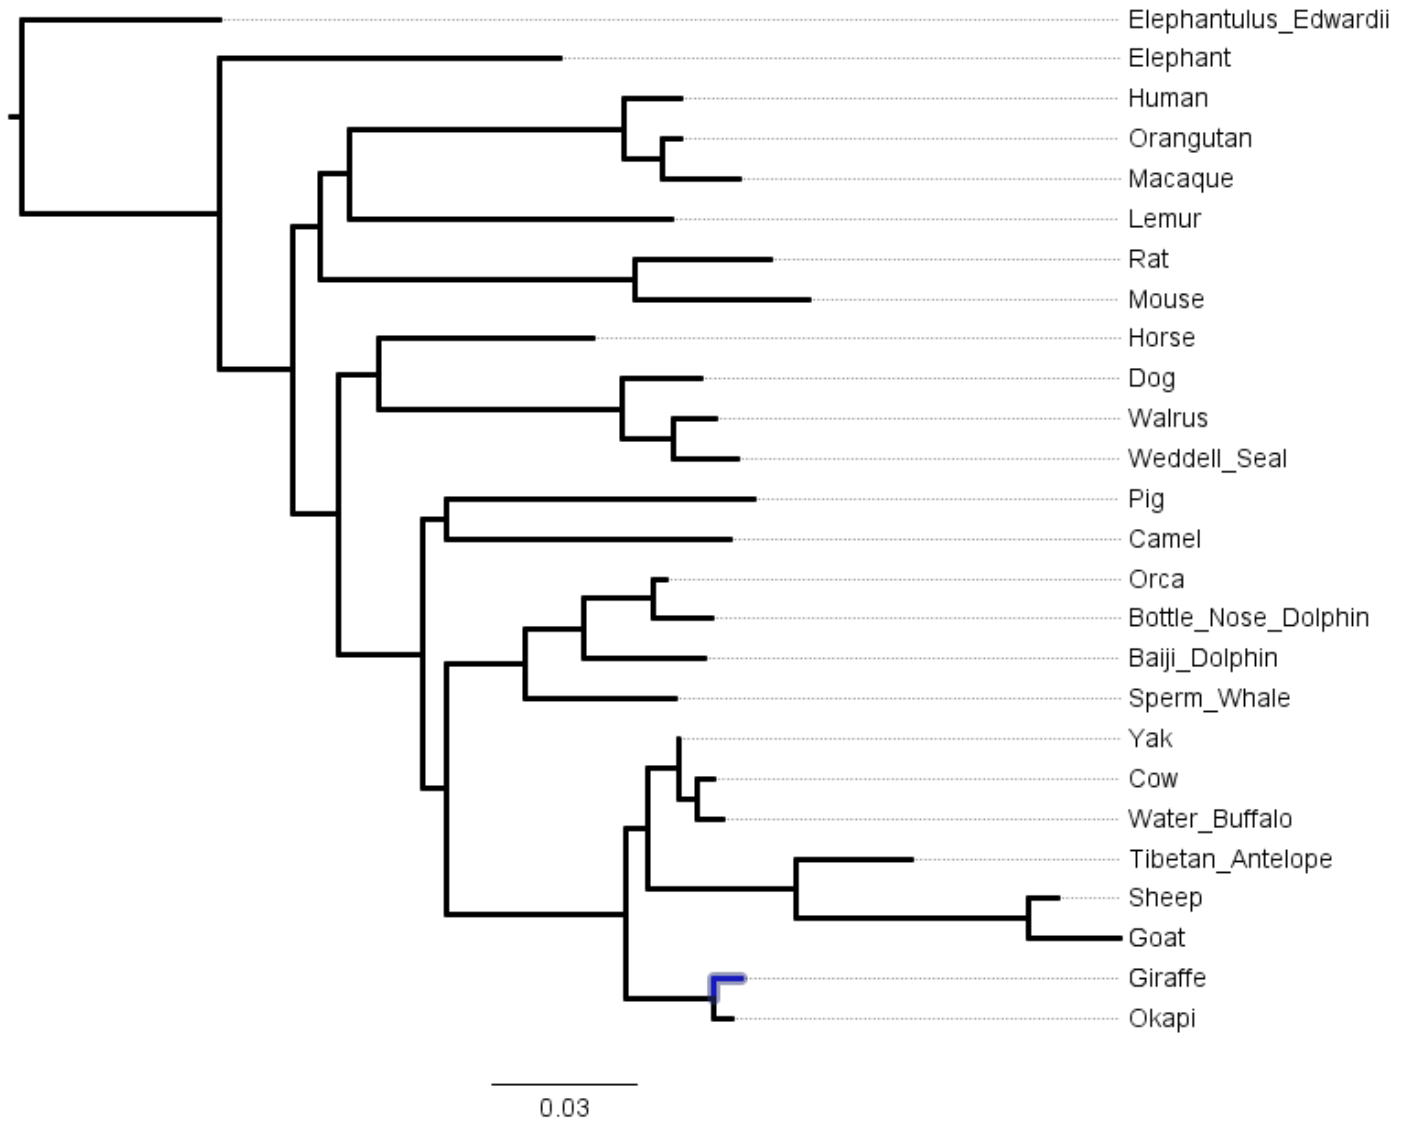

**Locus name:** Angiotensin converting enzyme (**ACE**)

**Locus name: Somatostatin Receptor 2 (SSTR2)**

ENSBTAT0000022785 SSTR2-201 somatostatin receptor behavior, eye, pancreas  
mouse: Homozygotes for a null allele show elevated anxiety and locomotor and exploratory deficits

PP2: All benign

Giraffe: P12S UPS, V24M UPS, G25E UPS, I29V UPS, F229L UIS, D336E UIS

**Protein sequence Alignment of Cow, Giraffe and Okapi SSTR2**

|         |     |                                                               |     |
|---------|-----|---------------------------------------------------------------|-----|
| Cow     | 1   | MDLVSELNETQPWLTAPFDLNGSVGAANISNQTEPYDLASNVVLTFFIYFVVCIIIGLCGN | 60  |
| Giraffe | 1   | ...A..F....S...S.....MET.DV.....A.....A.....                  | 60  |
| Okapi   | 1   | .....S.....D.....A..L..A.....                                 | 60  |
|         |     |                                                               |     |
| Cow     | 61  | TLVIYVILRYAKMKTITNIYILNLAIADELFMLGLPFLAMQVALVHWPFGKAMCRVVMTV  | 120 |
| Giraffe | 61  | .....I.....                                                   | 120 |
| Okapi   | 61  | .....I.....                                                   | 120 |
|         |     |                                                               |     |
| Cow     | 121 | DGINQFTSIFCLTVMSIDRYLAVVHPIKSAKWRRPRTAKMINVAVWGVSLLVILPIMIYA  | 180 |
| Giraffe | 121 | .....                                                         | 180 |
| Okapi   | 121 | .....                                                         | 180 |
|         |     |                                                               |     |
| Cow     | 181 | GLRSNQWGRSSCTINWPGESGAWYTGFIYAFILGFLVPLTIICLCYLFIIIKVKSSGIR   | 240 |
| Giraffe | 181 | .....L.....                                                   | 240 |
| Okapi   | 181 | .....                                                         | 240 |
|         |     |                                                               |     |
| Cow     | 241 | VGSSKRKKSEKKVTRMVSIVVAVFIFCWLFPYIFNVSSVVAISPTPALKGMFDFVVVLT   | 300 |
| Giraffe | 241 | .....                                                         | 300 |
| Okapi   | 241 | .....                                                         | 300 |
|         |     |                                                               |     |
| Cow     | 301 | YANSCANPILYAFLSDNFKKSFQNVLCIVKVSCTDDGERSDSKQDKSRLNETTETQRTLL  | 360 |
| Giraffe | 301 | .....A.E.....                                                 | 360 |
| Okapi   | 301 | .....A.....T.....                                             | 360 |
|         |     |                                                               |     |
| Cow     | 361 | NGDLQTSI                                                      | 368 |
| Giraffe | 361 | .....                                                         | 368 |
| Okapi   | 361 | .....                                                         | 368 |

**Newick Tree of Mammalian SSTR2**

((rat:0.00992787, mouse:0.00922574):0.0141798, (((alpaca:0.00168148, camel:0.00652659):0.0127307, (pig:0.00350426, (minke\_whale:0.000650498, sperm\_whale:0.00478433):0.00208782, (dolphin:0.00106841, (orca:0.00246721, baiji\_dolphin:0.00296761):0.001649):0.00749814):0.00504175):0.00103442):0.00201469, (((horse:0.00567714, rhino:0.00796606):0.00198576, elephant:0.00896672):0.0026655, (((panda:0.00449213, dog:0.00640737):0.000763132, walrus:0.000586227):0.00464178, tiger:0.00629546):0.00905596, (manatee:0.00727576, (human:0.000189696, (baboon:4.28727e-05, rhesus\_monkey:0.00267084):0.00525256):0.000559442, orangutan:0.00489409):0.0203181):0.001936):0.00276139):0.000444939, bushbaby:0.0249858):0.00341257):0.00315909, ((tibetan\_antelope:0.00772093, (goat:0.00272831, sheep:0):0.000476007):0.00248115, (giraffe:0.0223613, okapi:0.00790698):0.00842764, (cow:0.00274314, yak:0):0.00543617):0.00169616):0.0135158):0.0141798);

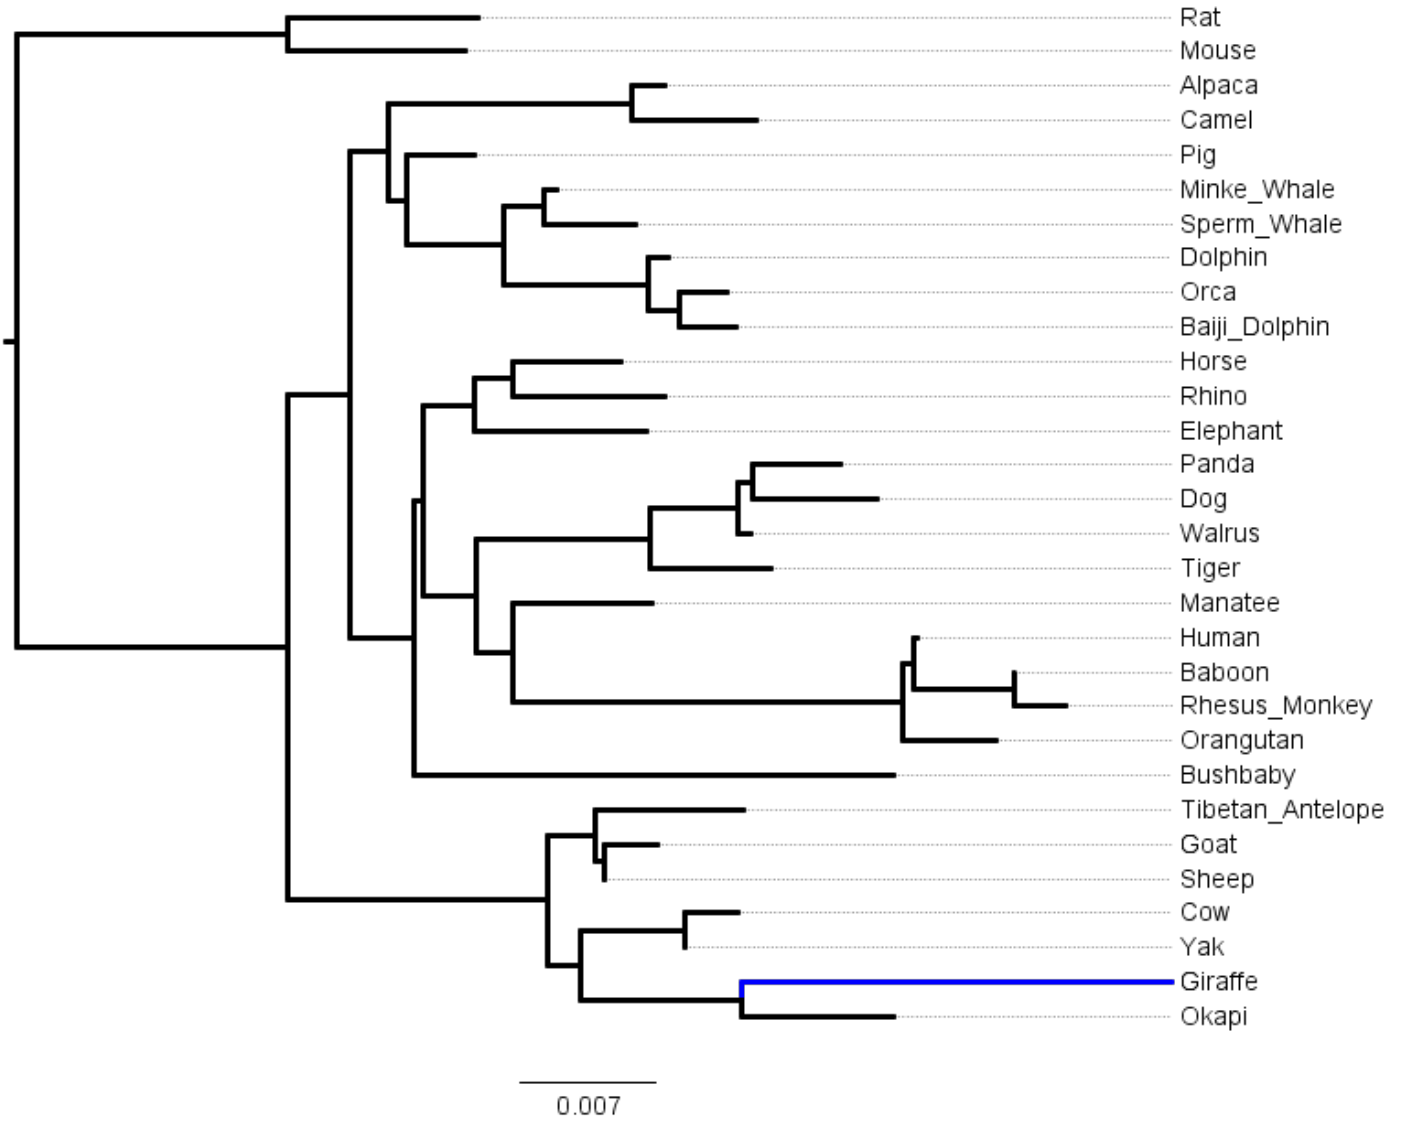

Locus name: Somatostatin Receptor 2 (SSTR2)

**Locus Name: fascin actin-bundling protein 1 (FSCN1)**

ENSBTAT0000004145 FSCN1-201 fascin, organizes filamentous actin nervous system, eye  
mouse: impaired migration of mature dendritic cells.

PP2: (Giraffe) A129T, S439W

Giraffe: A129T UIS, I346V UPS, S350C UIS, S439W UIS, V465A UIS

**Protein sequence Alignment of Cow, Giraffe and Okapi FSCN1**

|         |     |                                                               |     |
|---------|-----|---------------------------------------------------------------|-----|
| Cow     | 1   | MTANGTAEALQIQFGLINCSNKYLTAETFGFKVNASASSLKKKQIWTLEQPPDEAGSAAV  | 60  |
| Giraffe | 1   | .....                                                         | 60  |
| Okapi   | 1   | .....G.....                                                   | 60  |
|         |     |                                                               |     |
| Cow     | 61  | CLRSHLGRYLAADKDGNTCEHEAPGADCRFLIVAHDDGRWSLQSEVHRRYFGGTEDRLS   | 120 |
| Giraffe | 61  | .....S.....A.....                                             | 120 |
| Okapi   | 61  | .....A.....                                                   | 120 |
|         |     |                                                               |     |
| Cow     | 121 | CFAQTVSPAEEKSVHIAMHPQVNIYSLARKRYAHLGARPADDEISVDRDVPWGVDSLITLA | 180 |
| Giraffe | 121 | .....T.....                                                   | 180 |
| Okapi   | 121 | .....                                                         | 180 |
|         |     |                                                               |     |
| Cow     | 181 | FQDQRYSLQTADHRFLRHDLVAHPEPATGYTLEFRSGKVAFRDCEGRYLAPSGPSGTL    | 240 |
| Giraffe | 181 | .....                                                         | 240 |
| Okapi   | 181 | .....                                                         | 240 |
|         |     |                                                               |     |
| Cow     | 241 | KAGKATKVGKDELFALEQSCAQVVLQAANERNVSTRQGMDSLANSQDEETDQETFQLEIDR | 300 |
| Giraffe | 241 | .....                                                         | 300 |
| Okapi   | 241 | .....                                                         | 300 |
|         |     |                                                               |     |
| Cow     | 301 | DTKKCAFRTTHSGKYWTLTTGGVQSTASTKDARCYFDIEWRDRRIILRASNGKFVTAKN   | 360 |
| Giraffe | 301 | .....V...C.....                                               | 360 |
| Okapi   | 301 | .....                                                         | 360 |
|         |     |                                                               |     |
| Cow     | 361 | GQLAASVETAGDSEFLMKLINRPIIVFRGEHGFICRKTGTLDANRSNYDVFQLEFRD     | 420 |
| Giraffe | 361 | .....                                                         | 420 |
| Okapi   | 361 | .....                                                         | 420 |
|         |     |                                                               |     |
| Cow     | 421 | GAYNIKDSTGKYWMVGNDSVTSSSDSPVDFFLFCFDYKVAIKVGGHYLKGDHAGVLKA    | 480 |
| Giraffe | 421 | .....S.W.....A.....A.....                                     | 480 |
| Okapi   | 421 | .....T.....                                                   | 480 |
|         |     |                                                               |     |
| Cow     | 481 | CADTIDPTTLWEY                                                 | 493 |
| Giraffe | 481 | .....                                                         | 493 |
| Okapi   | 481 | .....                                                         | 493 |

**Newick Tree of Mammalian FSCN1**

(rat:0.0137084, ((dog:0, (polecat:0, walrus:0.00409865):0.00206885):0.00355177, ((galago:0.00929261, (human:0.0023545, (baboon:0.0006747, rhesus:0.00135576):0.00171471):0.0102139):0.00248441, (starnosedmole:0.0106757, (rhino:0.00825516, (pig:0.021789, ((giraffe:0.0133866, (okapi:0.00129707, (waterbuffalo:0.0022269, (cow:0, yak:4.95575e-05):0.00184229):0.00277217) :0.00196795):0.00884849, (dolphin:0, minke whale:0.00617017) :0.00616312):0.00298791):0.0244847):0.00245079):0.00217459):0.00226142):0.0137084);

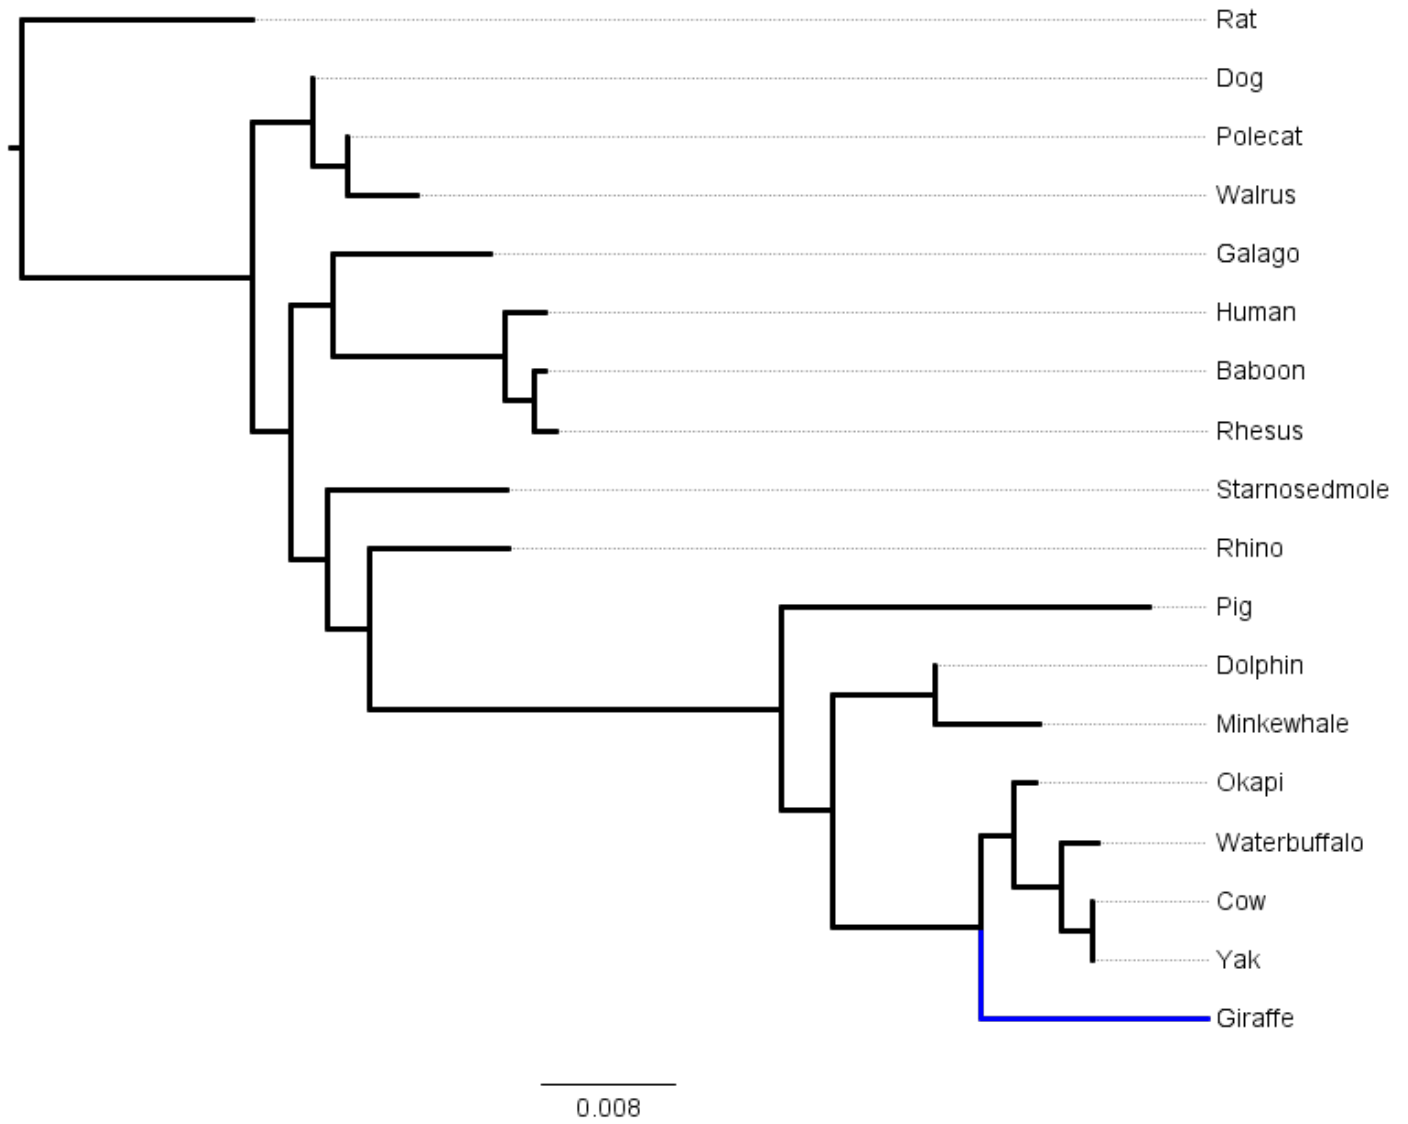

**Locus Name: fascin actin-bundling protein 1 (FSCN1)**

Locus name: neurofibromin 2 (NF2)

ENSBTAT0000017489 NF2-201 merlin regulator of hippo pathway auditory functions  
human: neurofibromatosis, deafness and balance disorder humans

PP2: All benign

Giraffe: L453P UIS, M457T UPS, K514R UIS, M522A UPS, N527S UIS, D529E UIS

**Protein sequence Alignment of Cow, Giraffe and Okapi NF2**

|         |     |                                                                |     |
|---------|-----|----------------------------------------------------------------|-----|
| Cow     | 1   | MKWKGKDLFDLVCRTLGLRETWFFGLQYTIKDTVAWLKMDKKVLDHDSKEEPVTFHFLA    | 60  |
| Giraffe | 1   | .....                                                          | 60  |
| Okapi   | 1   | .....                                                          | 60  |
|         |     |                                                                |     |
| Cow     | 61  | KFYPENAEELVQEITQHLFFLQVKKQILDEKIYCPPEASVLLASYAVQAKYGDYDPSVH    | 120 |
| Giraffe | 61  | .....                                                          | 120 |
| Okapi   | 61  | .....                                                          | 120 |
|         |     |                                                                |     |
| Cow     | 121 | KRGFLAQEELLPKRVINLYQMTPEMWEERITAWYAEHRGRARDEAEMEYLKIAQDLEMYG   | 180 |
| Giraffe | 121 | .....                                                          | 180 |
| Okapi   | 121 | .....                                                          | 180 |
|         |     |                                                                |     |
| Cow     | 181 | VNYFTIRNKKGTELLLLGVDALGLHIYDPENKLTPKISFPWNEIRNISYSKDKEFTIKPLDK | 240 |
| Giraffe | 181 | .....R.....                                                    | 240 |
| Okapi   | 181 | .....R.....                                                    | 240 |
|         |     |                                                                |     |
| Cow     | 241 | KIDVFKFNSSKLRVNKLILQLCIGNHDLFMRRRKADSLEVQOMKAQAREEKARKQMERQR   | 300 |
| Giraffe | 241 | .....                                                          | 300 |
| Okapi   | 241 | .....                                                          | 300 |
|         |     |                                                                |     |
| Cow     | 301 | LAREKQMREEAERTRDELERRLLQMKEEATMANEALMRSEETADLLAEKAQITEEEAKLL   | 360 |
| Giraffe | 301 | .....                                                          | 360 |
| Okapi   | 301 | .....                                                          | 360 |
|         |     |                                                                |     |
| Cow     | 361 | AQKAAEAEQEMQRIKATAIRTEEEKRLMEQKVLEAEVLALKMAEESERRAKEADQLKQDL   | 420 |
| Giraffe | 361 | .....                                                          | 420 |
| Okapi   | 361 | .....                                                          | 420 |
|         |     |                                                                |     |
| Cow     | 421 | QEAREAERRAKQKLEITTKPTYPPMNPLPAPLPPDMASFSLTGDSLFSDFKDTDMKRLS    | 480 |
| Giraffe | 421 | .....P...T...N.I.....                                          | 480 |
| Okapi   | 421 | .....N.I.....                                                  | 480 |
|         |     |                                                                |     |
| Cow     | 481 | MEIEKEKVEYMEKSKHLQEQLNELKTEIEALRLKERETALDMLHNENS DRGGGSKHNTI   | 540 |
| Giraffe | 481 | .....R.....A...SAE.....S..                                     | 540 |
| Okapi   | 481 | .....                                                          | 540 |
|         |     |                                                                |     |
| Cow     | 541 | KKLTLQSAKSRVAFFEEL                                             | 558 |
| Giraffe | 541 | .....                                                          | 558 |
| Okapi   | 541 | .....                                                          | 558 |

**Newick Tree of Mammalian NF2**

```
(sheep:0.0072789, (okapi:0, (cow:0.00516242, (giraffe:0.012789, (minke_whale:0.00257861,
(rhino:0.000713123, ((pig:0, camel:0.00721896):0.00113334, (walrus:0.00117661,
((baboon:0.000782206, (rat:0.00155475, mouse:0.00744633):0.00827791):0.000850732,
(orangutan:0.00146506, (bushbaby:0.00238309,
human:0):0.000333503):0.000281676):0.00118389):0.000570996, ((cat:0,
tiger:0.00360505):0.00176099, (manatee:0.00361199, (dog:0.000892328,
horse:0.00269835):0.00088528):4.24795e-
05):0.000208882):0.000454465):0.000691512):0.00108222):0.00830701):0.00170362):0.00026333):0.0072
789);
```



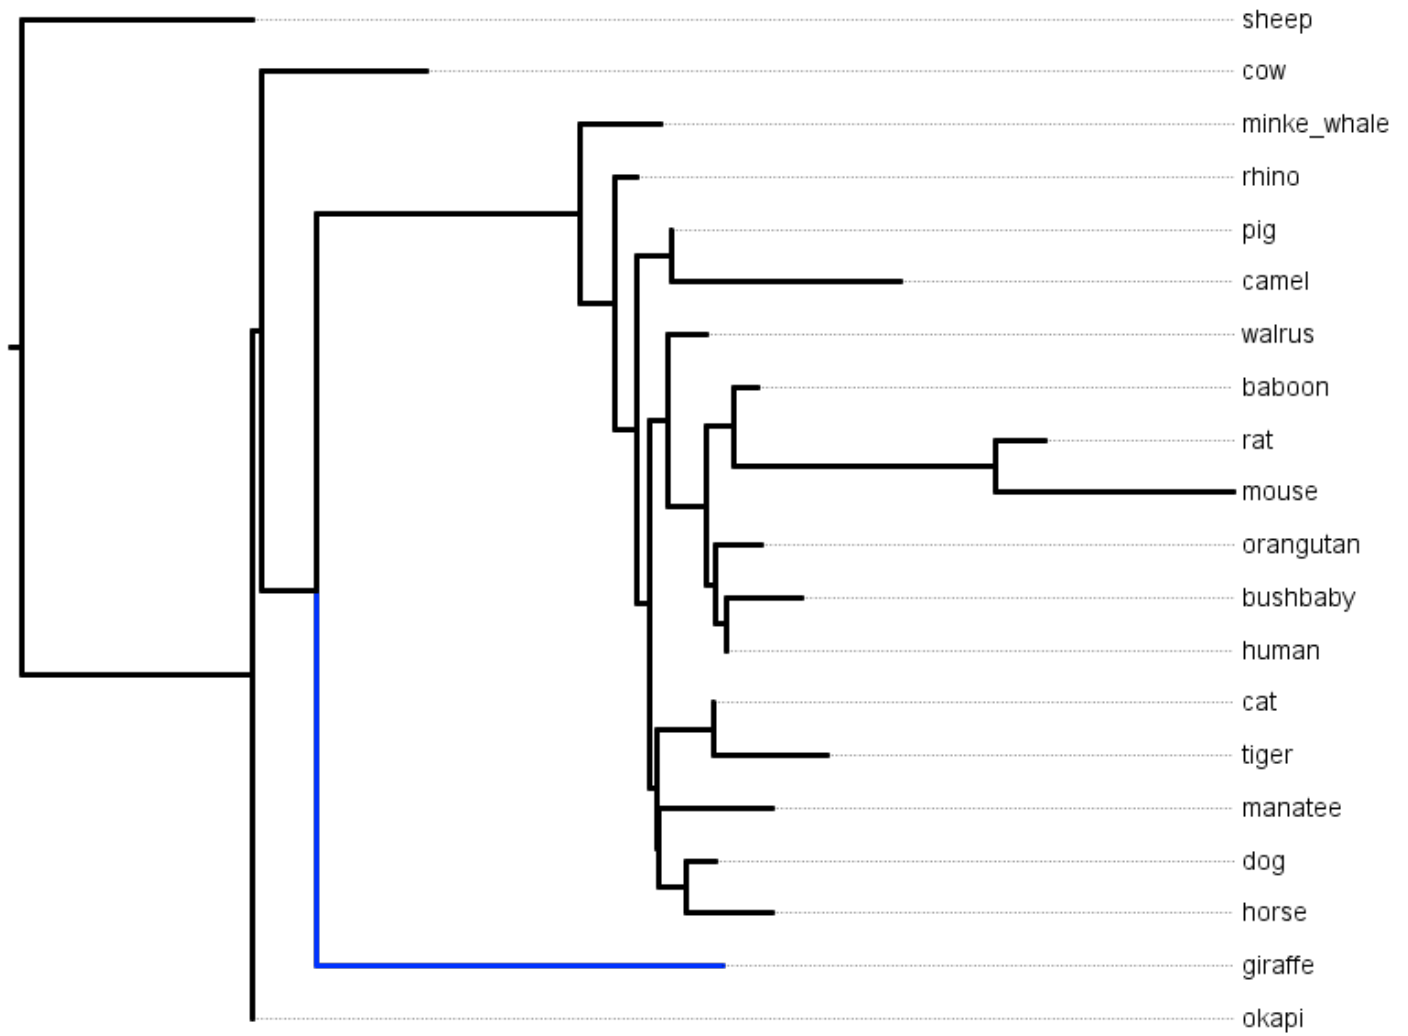

Locus name: neurofibromin 2 (**NF2**)

**Locus name: Cholinergic receptor nicotinic acid type 10 (CHRNA10)**

ENSBTAT00000061577 CHRNA10-201 neuronal acetylcholine receptor auditory functions, pain reception  
 mouse: impaired synaptic function and integrity of the olivocochlear system

PP2: (Giraffe) F412S

Giraffe: R369Q UPS, F412S UIS, M419V UIS

**Protein sequence Alignment of Cow, Giraffe and Okapi CHRNA10**

|         |     |                                                                                                       |     |
|---------|-----|-------------------------------------------------------------------------------------------------------|-----|
| Cow     | 2   | PECLGAEGRLAHKLFRLDFANYTSALRPVADTDQALNVTLEVTLSQIIDMDERNQVLTLY                                          | 61  |
| Giraffe | 2   | .....                                                                                                 | 61  |
| Okapi   | 2   | .....                                                                                                 | 61  |
|         |     |                                                                                                       |     |
| Cow     | 62  | LWIRQEWTDAYLRWDPDPTYGGLDAIRIPSSLVWRPDIVLYNKADAQAPASASTNVVLRHD                                         | 121 |
| Giraffe | 62  | .....                                                                                                 | 121 |
| Okapi   | 62  | .....                                                                                                 | 121 |
|         |     |                                                                                                       |     |
| Cow     | 122 | GAVRWDAPAITRSSCRVDVSAFPFDAQRCGLTFGSWTHGGHQLDVRPRGAAASLADFVEN                                          | 181 |
| Giraffe | 122 | .....                                                                                                 | 181 |
| Okapi   | 122 | .....                                                                                                 | 181 |
|         |     |                                                                                                       |     |
| Cow     | 182 | VEWRVLGMPARRRVLTYGCCSEPYPDVFTLLLRRAAYVCNLLLPCVLISLLAPLAFH                                             | 241 |
| Giraffe | 182 | .....                                                                                                 | 241 |
| Okapi   | 182 | .....H.....                                                                                           | 241 |
|         |     |                                                                                                       |     |
| Cow     | 242 | LPADSGEKVS LGVTVLLALT V F Q L I L A E S M P P A E S V P L I G K Y Y M A T M T M V T F S T A L T I L I | 301 |
| Giraffe | 242 | .....                                                                                                 | 301 |
| Okapi   | 242 | .....                                                                                                 | 301 |
|         |     |                                                                                                       |     |
| Cow     | 302 | MNLHYCGPSARPVPAWARALLGRLARGLCVRRERGEPCGQSRPPESPSPQPPDRGTGPP                                           | 361 |
| Giraffe | 302 | .....Q.....Q.....                                                                                     | 361 |
| Okapi   | 302 | .....Q.....Q.....                                                                                     | 361 |
|         |     |                                                                                                       |     |
| Cow     | 362 | AGPCHEPRCLCHQEALLRHVATIANAFHSHRAAQRREDWKRLARVMDRFFLGIFFSMAL                                           | 421 |
| Giraffe | 362 | .....Q...R.....Q.....S.....V..                                                                        | 421 |
| Okapi   | 362 | .....                                                                                                 | 421 |
|         |     |                                                                                                       |     |
| Cow     | 422 | VMSLLVLRAL                                                                                            | 432 |
| Giraffe | 422 | .....Q..                                                                                              | 432 |
| Okapi   | 422 | .....Q..                                                                                              | 432 |

**Newick Tree of Mammalian CHRNA10**

(bushbaby:0.0161892, ((rhino:0.0191045, (elephant:0.0284532, manatee:0.0141192):0.0192858):0.00303032, ((human:0.00489306, orangutan:0.00674878):0.0247126, ((walrus:0.0244484, polecat:0.01357):0.00229231, cat:0.0178311):0.00522417, (pig:0.0268766, (orca:0.0272514, ((water\_buffalo:0.0105222, cow:0.00111961):0.00290069, (giraffe:0.0130554, okapi:0.00563779):0.00300523):0.0066197):0.00354559):0.00383643):0.00371258):0.00178816):0.0161892);

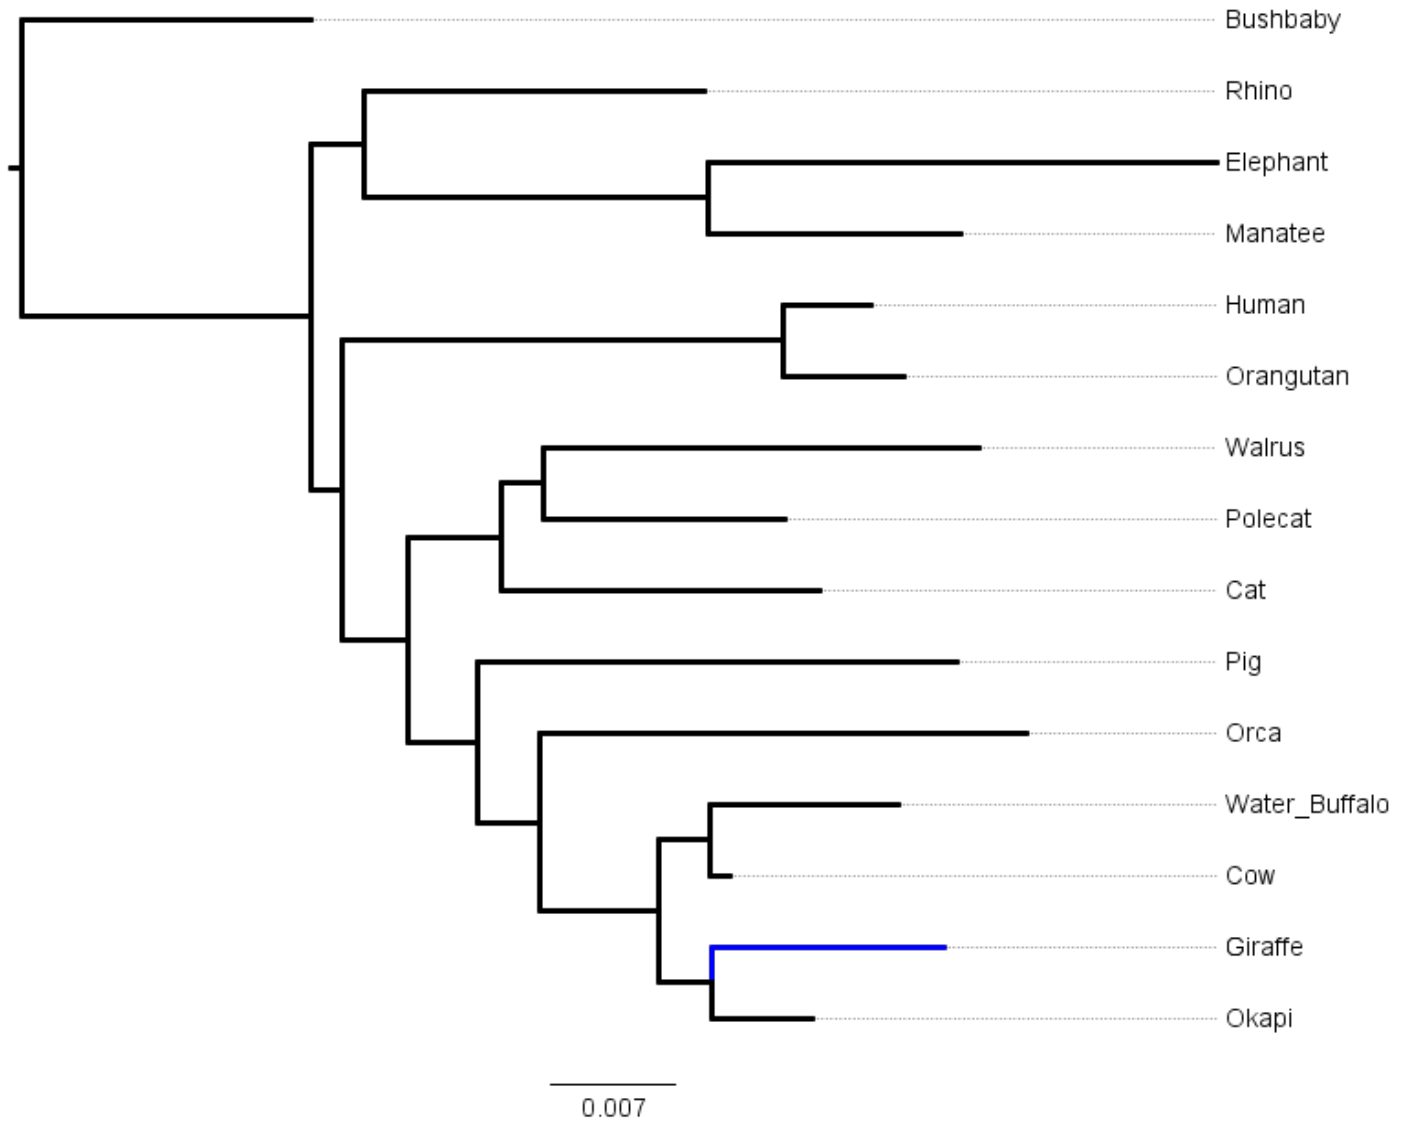

Locus name: Cholinergic receptor nicotinic acid type 10  
(**CHRNA10**)

**Locus Name: PARK2 co-regulated-like (PACRGL)**

ENSBTAT00000047431 PACRGL-201 E3 ubiquitin protein ligase parkin-like unknown substrate  
expressed in brain  
no mutations in m/h

PP2: (Giraffe) L156I

Giraffe: D21G UIS, L156I UIS, T219A UPS  
Giraffe/Okapi: G9A UPS, D171N UIS

**Protein sequence Alignment of Cow, Giraffe and Okapi PACRGL**

|         |     |                                                                |     |
|---------|-----|----------------------------------------------------------------|-----|
| Cow     | 1   | MQKSEFHRGVQMRSLTDNCDQRTSSSAQVKHGTTVQQSKSSSSTSSPESARKLHPRPSD    | 60  |
| Giraffe | 1   | .....C..A....N.....G.....                                      | 60  |
| Okapi   | 1   | .....C..A....N.....                                            | 60  |
|         |     |                                                                |     |
| Cow     | 61  | KLNPKTINPFGEQSRAPSAFAAIYSKGGIPCRLVHGSVKHRLQWECPEKLPFDPLLITL    | 120 |
| Giraffe | 61  | .....                                                          | 120 |
| Okapi   | 61  | .....V..                                                       | 120 |
|         |     |                                                                |     |
| Cow     | 121 | AEGLRETKHPYTFVSKEGFRELLLVGTGAPEKAVPLLPRLLIPVLKAALVHVDDEVFERGLN | 180 |
| Giraffe | 121 | .....H.....I.K.....N.....                                      | 180 |
| Okapi   | 121 | .....K.....N.....                                              | 180 |
|         |     |                                                                |     |
| Cow     | 181 | ALVQLSVVVGPAINDHLKHLTSLSKRLRDKKFKPEITTALQKLEQHGGSGSLIIIKSKI    | 240 |
| Giraffe | 181 | .....S.....A.....S.....                                        | 240 |
| Okapi   | 181 | .....S.....                                                    | 240 |
|         |     |                                                                |     |
| Cow     | 241 | PTYCSICC                                                       | 248 |
| Giraffe | 241 | .....                                                          | 248 |
| Okapi   | 241 | .....                                                          | 248 |

**Newick Tree of Mammalian PACRGL**

(pig:0.0268583, ((camel:0.00508934, alpaca:0.00304088):0.0291624, (((((polecat:0.0210547, walrus:0.0243295):0.00631024, dog:0.0277088):0.0114588, (cat:0.00202021, tiger:0.00202021):0.0209913):0.00821082, ((manatee:0.0279144, (((baboon:0.00822717, rhesus\_monkey:0.00394367):0.0191261, orangutan:0.00135305):0.00447901, human:0.00785994):0.0407379, (mouse:0.0223182, rat:0.0275053):0.0482884):0.0133719):0.00837059, (horse:0.0220272, rhino:0.0277962):0.0155863):0.00689242):0.00484492, (((sperm\_whale:0.0163535, minke\_whale:0.0248162):0.00342143, orca:0.00906974):0.00124775, baiji\_dolphin:0.0109736):0.0192152, ((giraffe:0.0193302, okapi:0.00506371):0.012119, ((tibetan\_antelope:0.0142917, (goat:0.0039665, sheep:0.0122947):0.00207989):0.00316881, water\_buffalo:0.0070155):0.00148076):0.000167112, (cow:0.0081629, yak:0):0.00437129):0.0168449):0.0127507):0.00427376):0.0268583);

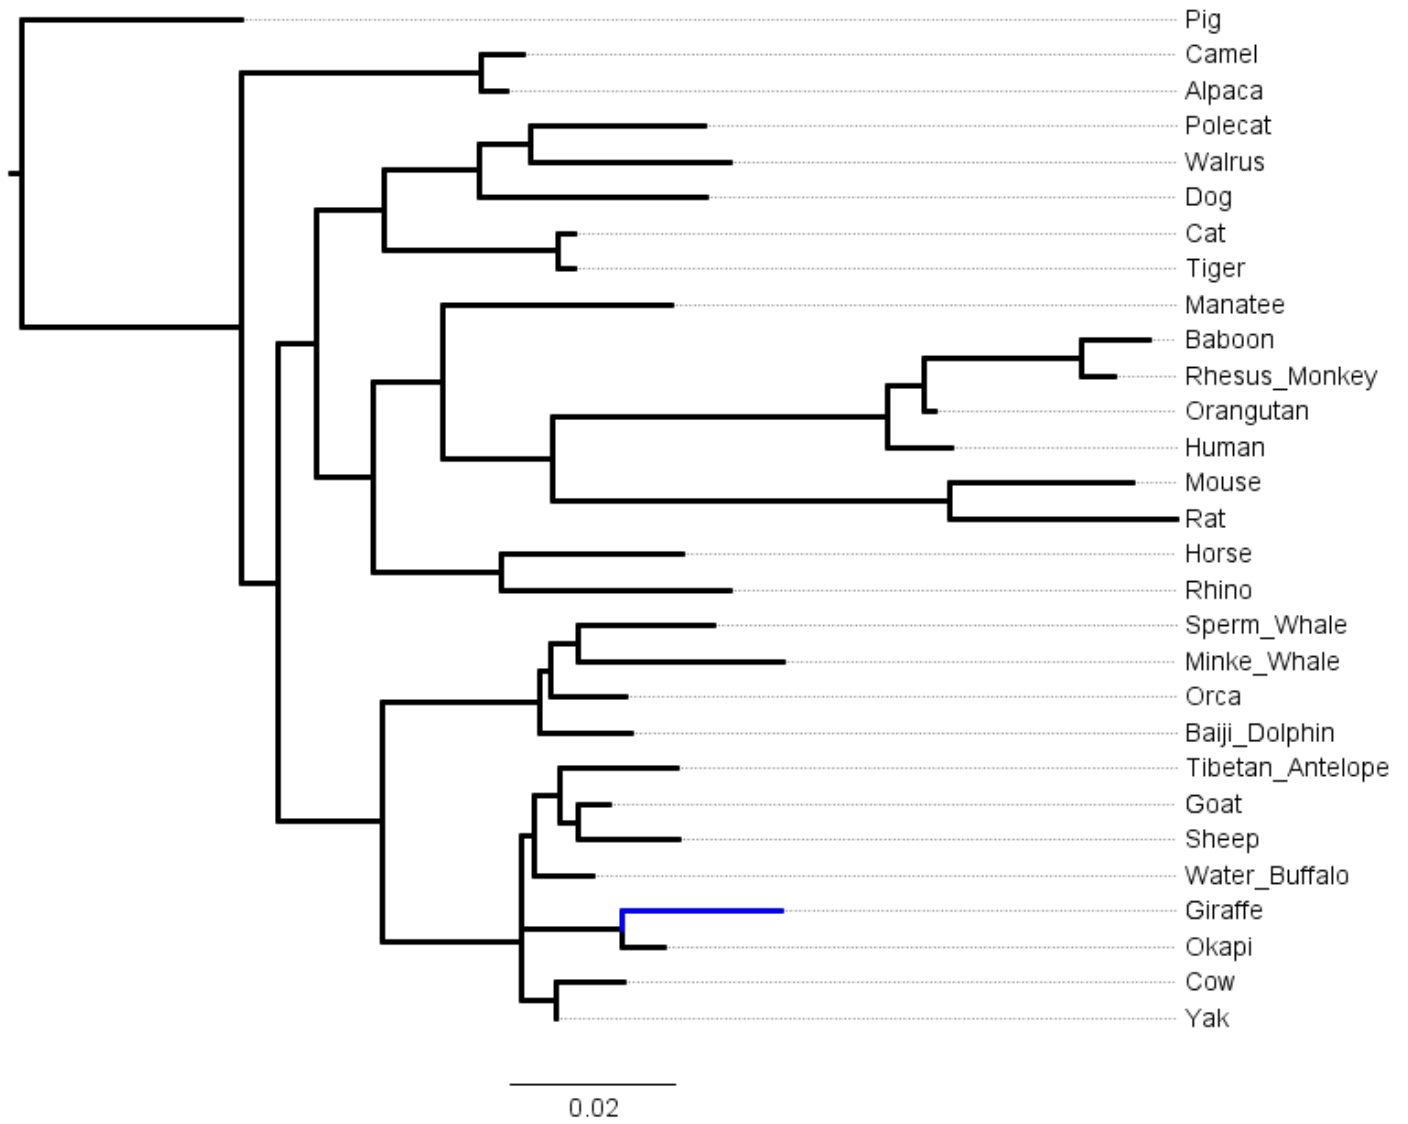

**Locus Name: PARK2 co-regulated-like (PACRGL)**

**Locus Name: slit homolog 2 (SLIT2)**

ENSBTAT00000061059 SLIT2-201 secreted axon guidance replusive protein axonal guidance  
in the nervous system  
mouse: perinatal lethality, abnormal ureteric bud development, multiple fused kidneys, multiple  
ureters, and hydroureter; DKO with slit1 shows retinal axon guidance defects

PP2: (Giraffe) I488V, G1435E; (Giraffe/Okapi) V1405I

Giraffe: I486V UIS, G1433E UIS

Giraffe/Okapi: V1405I UIS

**Protein sequence Alignment of Cow, Giraffe and Okapi SLIT2**

|         |     |                                                                |     |
|---------|-----|----------------------------------------------------------------|-----|
| Cow     | 1   | MHGVGWTLSLSLGLVLAAILNEVAPQACPAQCSCSGSTVDCHGLALRSVPRNIPRNTERL   | 60  |
| Giraffe | 1   | .....                                                          | 60  |
| Okapi   | 1   | .....                                                          | 60  |
| Cow     | 61  | DLNGNNITRITKTDFAGLRHLRVLQLMENKITTIERGAFQDLKELERLRLNRNHLQLFPE   | 120 |
| Giraffe | 61  | .....                                                          | 120 |
| Okapi   | 61  | .....                                                          | 120 |
| Cow     | 121 | LLFLGTSKLYRLDLSENQIQAI PRKAFRGAVDIKKNLQLDYNHISCIEDGAFRALRDLEVL | 180 |
| Giraffe | 121 | .....Q.....                                                    | 180 |
| Okapi   | 121 | .....Q.....                                                    | 180 |
| Cow     | 181 | TLNNNNITRLSVASFNHMPKLRTRFLHSNNLYCDCHLAWLSDWLRQRPRVGLYTQCMGPS   | 240 |
| Giraffe | 181 | .....                                                          | 240 |
| Okapi   | 181 | .....                                                          | 240 |
| Cow     | 241 | HLRGHNVAEVQKREFVCSGHQSFMAPSCSVLHCPAACTCSNNIVDCRGKGLTEIPTNLPE   | 300 |
| Giraffe | 241 | .....                                                          | 300 |
| Okapi   | 241 | .....                                                          | 300 |
| Cow     | 301 | TITEIRLEQNSIKVIPPAGAFSPYKLRIDLSNNQISELAPDAFQGLRSLNSLVLYGNKI    | 360 |
| Giraffe | 301 | .....                                                          | 360 |
| Okapi   | 301 | .....                                                          | 360 |
| Cow     | 361 | TELPKSLFEGFLFSLQLLLLNANKINCLRVDAFQDLHNLNLLSLYDNKLTIAKGTFSPLR   | 420 |
| Giraffe | 361 | .....                                                          | 420 |
| Okapi   | 361 | .....                                                          | 420 |
| Cow     | 421 | AIQTMHLAQNPFFICDCHLKWLDYLHTNPIETSGARCTSPRRLANKRIGQIKSKKFRCSA   | 480 |
| Giraffe | 421 | .....                                                          | 480 |
| Okapi   | 421 | .....                                                          | 480 |
| Cow     | 481 | KEQYFIPGTEDYRSKLSGDCFADLACPEKRCCEGTVDCSNQKLTIPDHIPOQYTAELRL    | 540 |
| Giraffe | 481 | .....V.....                                                    | 540 |
| Okapi   | 481 | .....                                                          | 540 |
| Cow     | 541 | NNNEFTVLEATGIFKQLRKLINFSNNKITDIEEGAFEGASGVNEILLTSNRLENVQHK     | 600 |
| Giraffe | 541 | .....                                                          | 600 |
| Okapi   | 541 | .....                                                          | 600 |
| Cow     | 601 | MFKGLESKLTMLRSNRISCVGNDSFIGLSSVRLLSLYDNQITTIAPGAFDTLHSLSTLN    | 660 |
| Giraffe | 601 | .....                                                          | 660 |
| Okapi   | 601 | .....                                                          | 660 |
| Cow     | 661 | LLANPFNCNCYLAWLGEWLRKKRIVTGNPRCQKPYFLKEIPIQDVAIQDFTCDDGNDNS    | 720 |
| Giraffe | 661 | .....                                                          | 720 |
| Okapi   | 661 | .....                                                          | 720 |
| Cow     | 721 | CSPLSRCPAECTCLDVTVVRCSNKALKVLPKGI PRDVTELYLDGNQFTLVPKELSNYKHLT | 780 |
| Giraffe | 721 | .....R.....                                                    | 780 |
| Okapi   | 721 | .....                                                          | 780 |

|         |      |                                                               |      |
|---------|------|---------------------------------------------------------------|------|
| Cow     | 781  | LIDLNNRISTLSNQSFNSMTQLLTLILSYNRLRCIPPRTFDGLKSLRLLSLHGNDISVV   | 840  |
| Giraffe | 781  | .....I.                                                       | 840  |
| Okapi   | 781  | .....I.                                                       | 840  |
| Cow     | 841  | PEGAFNDLAALSHLAIGANPLYCDCNMQWLSDWVKSEYKEPGIARCAGPGEMADKLLLT   | 900  |
| Giraffe | 841  | .....                                                         | 900  |
| Okapi   | 841  | ...V.....                                                     | 900  |
| Cow     | 901  | PSKKFTCQGPVDVNILAKCNPCLSNPCKNDGTCNNDPVDFYRCTCPYGFKGQDCDVPIHA  | 960  |
| Giraffe | 901  | .....                                                         | 960  |
| Okapi   | 901  | .....                                                         | 960  |
| Cow     | 961  | CISNPCKHGGTCHLKEGEKDFWCICADGFEGENCEINVDDCEDNDCENNSTCVDGINNY   | 1020 |
| Giraffe | 961  | .....                                                         | 1020 |
| Okapi   | 961  | .....                                                         | 1020 |
| Cow     | 1021 | TCLCPPEYTGELCEEKLDFAQDLNPCQHDSKILTPKGYKCDCTPGYIGEHCIDIDFDDC   | 1080 |
| Giraffe | 1021 | .....                                                         | 1080 |
| Okapi   | 1021 | .....                                                         | 1080 |
| Cow     | 1081 | QDNCKNGAHCTDAVNGYTCTCEGYSGLFCEFSPPMVLPRTPPCDNFDCQNGAQCIIRI    | 1140 |
| Giraffe | 1081 | .....                                                         | 1140 |
| Okapi   | 1081 | .....                                                         | 1140 |
| Cow     | 1141 | NEPICQCLPGYQGEKCEKLVSVNFVNKESYLQIPSAKVRPQTNITLQIATDEDSGILLYK  | 1200 |
| Giraffe | 1141 | .....                                                         | 1200 |
| Okapi   | 1141 | .....                                                         | 1200 |
| Cow     | 1201 | GDKDHIAVELYRGRVRASYDTGSHPASAIYSVETINDGNFHVIVELLALDQSLSLSDVGGG | 1260 |
| Giraffe | 1201 | .....                                                         | 1260 |
| Okapi   | 1201 | .....T.....                                                   | 1260 |
| Cow     | 1261 | PKIITNLSKQSTLNFDSPLYVGGMPGKNNVAAALRQAPGQNGTSFHGCIRNLYINSELQD  | 1320 |
| Giraffe | 1261 | .....                                                         | 1320 |
| Okapi   | 1261 | .....                                                         | 1320 |
| Cow     | 1321 | FRKVPMQTGILPGCEPCHKKVCAGHTCQPSSQAGFTCECEEGWTGPLCDQRTNDPCLGNK  | 1380 |
| Giraffe | 1321 | .....                                                         | 1380 |
| Okapi   | 1321 | .....                                                         | 1380 |
| Cow     | 1381 | CVHGTCLPINAFAFSYSCKLEGHGGVLCDEEEDLFNPCQAIKCKHKGKRLSGLGQPYCECS | 1440 |
| Giraffe | 1381 | .....I.....E.....                                             | 1440 |
| Okapi   | 1381 | .....I.....                                                   | 1440 |
| Cow     | 1441 | SGYTGDSCDREISCRGERIRDYYQKQGYAACQTTKKVSRLECRGGCAGGQCCGPLRSKR   | 1500 |
| Giraffe | 1441 | .....                                                         | 1500 |
| Okapi   | 1441 | .....                                                         | 1500 |
| Cow     | 1501 | RKYSFECTDGSSFVDEVEKVVKCGCTRCAS                                | 1530 |
| Giraffe | 1501 | .....                                                         | 1530 |
| Okapi   | 1501 | .....                                                         | 1530 |

#### Newick Tree of Mammalian SLIT2

(human:0.00579445, ((matatee:0.00789571, elephant:0.00924464):0.00635343, ((camel:0.00025418, alpaca:0.00170853):0.00657847, ((minke\_whale:0.0022852, orca:0.0029573):0.00426928, (((tiger:0.0042252, (polar\_bear:0.00526635, (ferret:0.00454093, walrus:0.00597185):0.000651015):0.00483798):0.000552789, (horse:0.00498033, rhino:0.00421225):0.00201584):0.000443819, ((sheep:0, tibetan\_antelope:0.00196769):0.000648594, ((cow:3.18391e-06, yak:0.00130486):0.000652231, water\_buffalo:2.00589e-06):6.93232e-06):9.87529e-06, (giraffe:0.00194604, okapi:0.00132729):0.00130188):0.0046268):0.000258086):0.000559053):0.000665248):0.00579445);

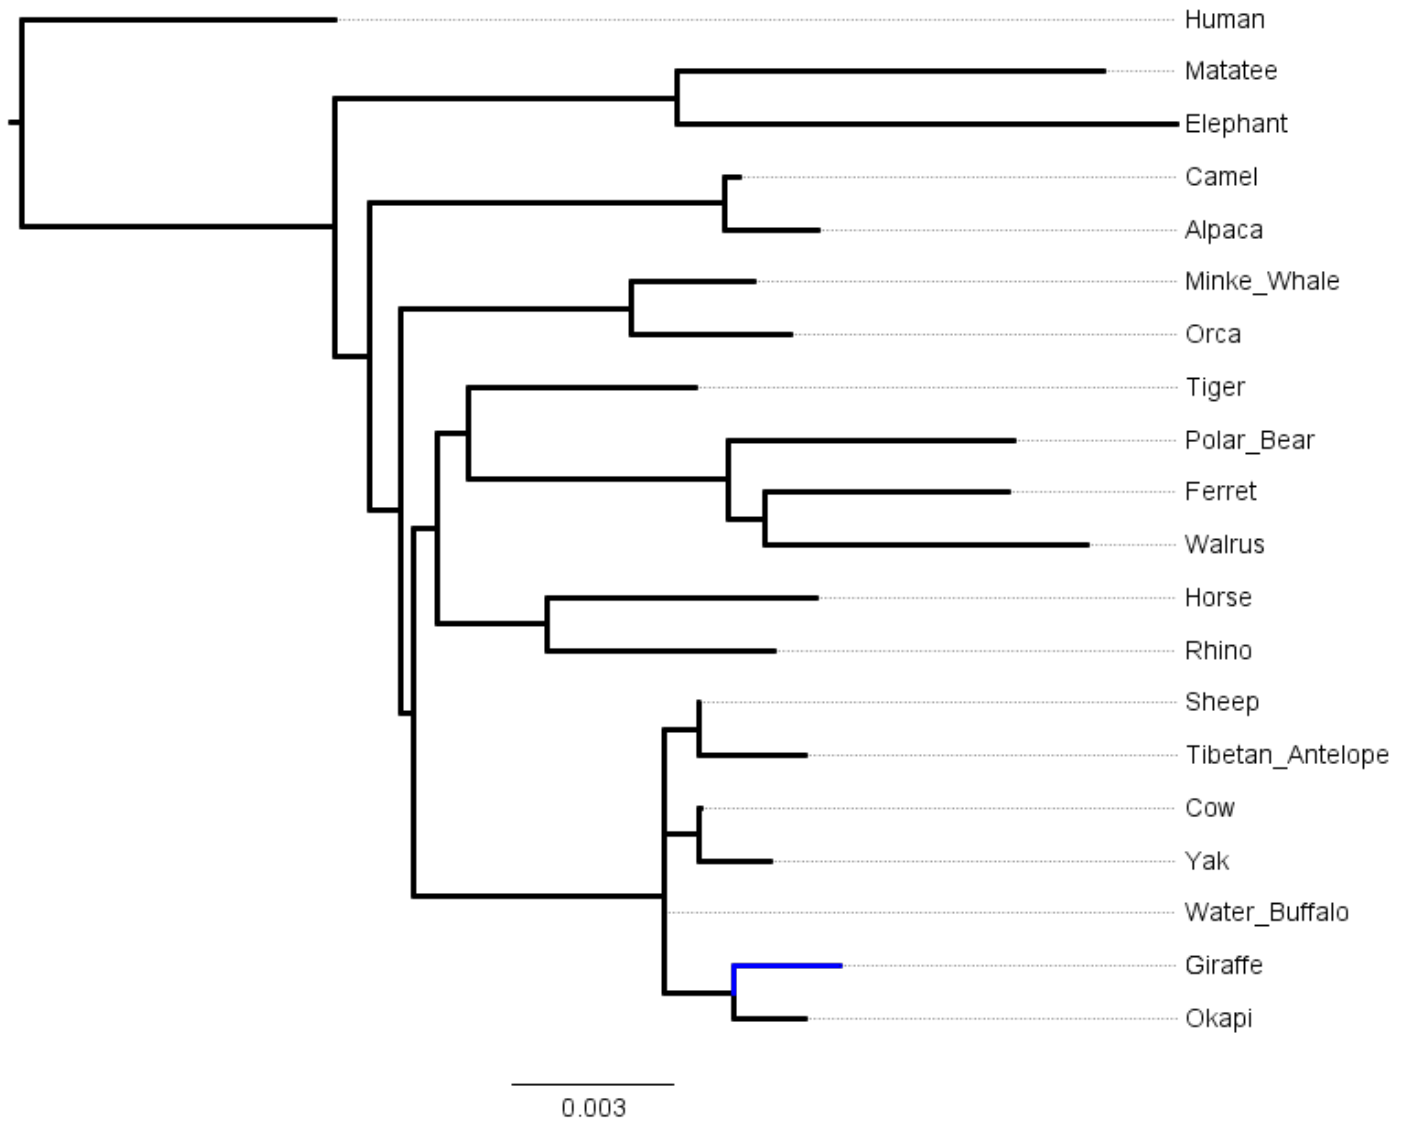

Locus Name: slit homolog 2 (SLIT2)



**Locus Name:** Semaphorin 3A (**SEMA3A**)

ENSBTAT0000024139 SEMA3A-201 semaphorin 3A axonal guidance  
mouse: patterning abnormalities of sensory and sympathetic neurons, abnormal embryonic bones and cartilaginous structures, cardiac defects, and high postnatal mortality

PP2: (Giraffe) L514F

Giraffe: I292V UIS, L514F UIS,  
Giraffe/Okapi: H579Y UIS, I628V UIS, I629F UIS  
Okapi: N43D UPS, A52D UPS

**Protein sequence Alignment of Cow, Giraffe and Okapi SEMA3A**

|         |     |                                                                |     |
|---------|-----|----------------------------------------------------------------|-----|
| Cow     | 1   | MGWFARIVCLFWGVLLTARANYQNGKNNVPRLLKLSYKEMLESNNVITFNGLANSSSYHTF  | 60  |
| Giraffe | 1   | ....T.....                                                     | 60  |
| Okapi   | 1   | ....T.....D.....D.....                                         | 60  |
| Cow     | 61  | LLDEERSRLYVVGAKDHIFSFNLVNIKDFQKIVWPVSYTRRDECKWAGKDILKECANFIKV  | 120 |
| Giraffe | 61  | .....                                                          | 120 |
| Okapi   | 61  | .....                                                          | 120 |
| Cow     | 121 | LKAYNQTHLYACGTGAFHPVCTYIEIGHHPEDNIFKQLQDSHFENGRGKSPYDPKLLTASL  | 180 |
| Giraffe | 121 | .....                                                          | 180 |
| Okapi   | 121 | .....V.....                                                    | 180 |
| Cow     | 181 | LIDGELYSGTAADFMGRDFAIFRTLGHHPHPIRTEQHDSRWLNDPRFISAHLIPESDNPED  | 240 |
| Giraffe | 181 | .....                                                          | 240 |
| Okapi   | 181 | .....                                                          | 240 |
| Cow     | 241 | DKVYFFFRENAIDGEHTGKATHARIGQICKNDFGGHRSLVNKWTTFLKARLICSVPGPNG   | 300 |
| Giraffe | 241 | .....V.....                                                    | 300 |
| Okapi   | 241 | .....                                                          | 300 |
| Cow     | 301 | IDTHFDELQDVFLMNSKDPKNPVVYGVFTTSSNIFKGSAVCMYSMSDVRVFLGPHYAHRD   | 360 |
| Giraffe | 301 | .....                                                          | 360 |
| Okapi   | 301 | .....                                                          | 360 |
| Cow     | 361 | GPNYQWVPYQGRVPYPRPGTCCPSKTFGGFDSTKDLRDDVITFARSHPAMYNPVFPINNRP  | 420 |
| Giraffe | 361 | .....                                                          | 420 |
| Okapi   | 361 | .....                                                          | 420 |
| Cow     | 421 | IMIKTDVNYQFTQIVVDRVDAEDGQYDVMFIGTDVGTVLKVVSI PKETWHDLEEVLL EEM | 480 |
| Giraffe | 421 | .....                                                          | 480 |
| Okapi   | 421 | .....                                                          | 480 |
| Cow     | 481 | TVFREPTTISAMELSTKQQQLYIGSTTGVTQLPLHRCDIYGKACAECCLARDPYCAWDGS   | 540 |
| Giraffe | 481 | .....F.....                                                    | 540 |
| Okapi   | 481 | .....                                                          | 540 |
| Cow     | 541 | SCSRYFPTAKRRTRRQDIRNGDPLTHCSLDLQHHDNHHGHSFEERIIYGVENSTFLECSF   | 600 |
| Giraffe | 541 | .....Y.....                                                    | 600 |
| Okapi   | 541 | .....Y.....                                                    | 600 |
| Cow     | 601 | KSQRALVYWQFQRRNEEPKEEIRVDDHIIRTEQGLLLRSLQRKDSGNYLCHAVEHGFMQT   | 660 |
| Giraffe | 601 | .....R.....VF.....                                             | 660 |
| Okapi   | 601 | .....R.....A.....VF.....                                       | 660 |
| Cow     | 661 | LLKVTLEVIDTEHLEELLHKDDDDGSGSKTKETSNSMTPSQKVWYRDFMQLINHPNLNTMD  | 720 |
| Giraffe | 661 | .....                                                          | 720 |
| Okapi   | 661 | .....                                                          | 720 |
| Cow     | 721 | EFCEQVWKRDRKQRRQRPGHQTQGSNSNKWHLQENKKGRRNRTHEFERAPRSV          | 772 |
| Giraffe | 721 | .....                                                          | 772 |
| Okapi   | 721 | .....                                                          | 772 |

**Newick Tree of Mammalian SEMA3A**

((rat:0.00126554, mouse:0.00523226):0.00771245, (aardvark:0.0109108, (Brandt\_s\_bat:0.0132348, ((rhino:0.00888282, (macaque:0.00515895, (human:0.00259225,

orangutan:0.0013064):0.0118789):0.00557789):0.00109964, lemur:0.0130289):8.98605e-05,  
 ((manatee:0.00491042, elephant:0.00944127):0.00344414, ((camel:0.00195809,  
 alpaca:0.00323675):0.00514718, horse:0.00858057):0.00227274, (((tiger:7.82861e-05,  
 cat:0.00121789):0.00508394, black\_flying\_fox:0.00796299):0.000553852, (Weddell\_seal:0.00210906,  
 walrus:0.00308578):0.000939603, ((panda:0.00325176, polar\_bear:0.00194308):0.00328084,  
 ((orca:0.000157567, baiji\_dolphin:0.00243647):0.00266046, minke\_whale:0.00384584):0.00319759,  
 (water\_buffalo:0.000820761, ((cow:0.00131248, (sheep:0.000379679, (tibetan\_antelope:0.00227078,  
 goat:0.00292406):0.000916491):0.000960902):3.31973e-05, (giraffe:0.00267287,  
 okapi:0.00512959):0.00519282):0.000473033):0.00359753):0.00129819):0.000914216):0.000906283):0.00  
 0465674):0.000806921):0.000777333):0.00136915):0.00256779):0.00771245);

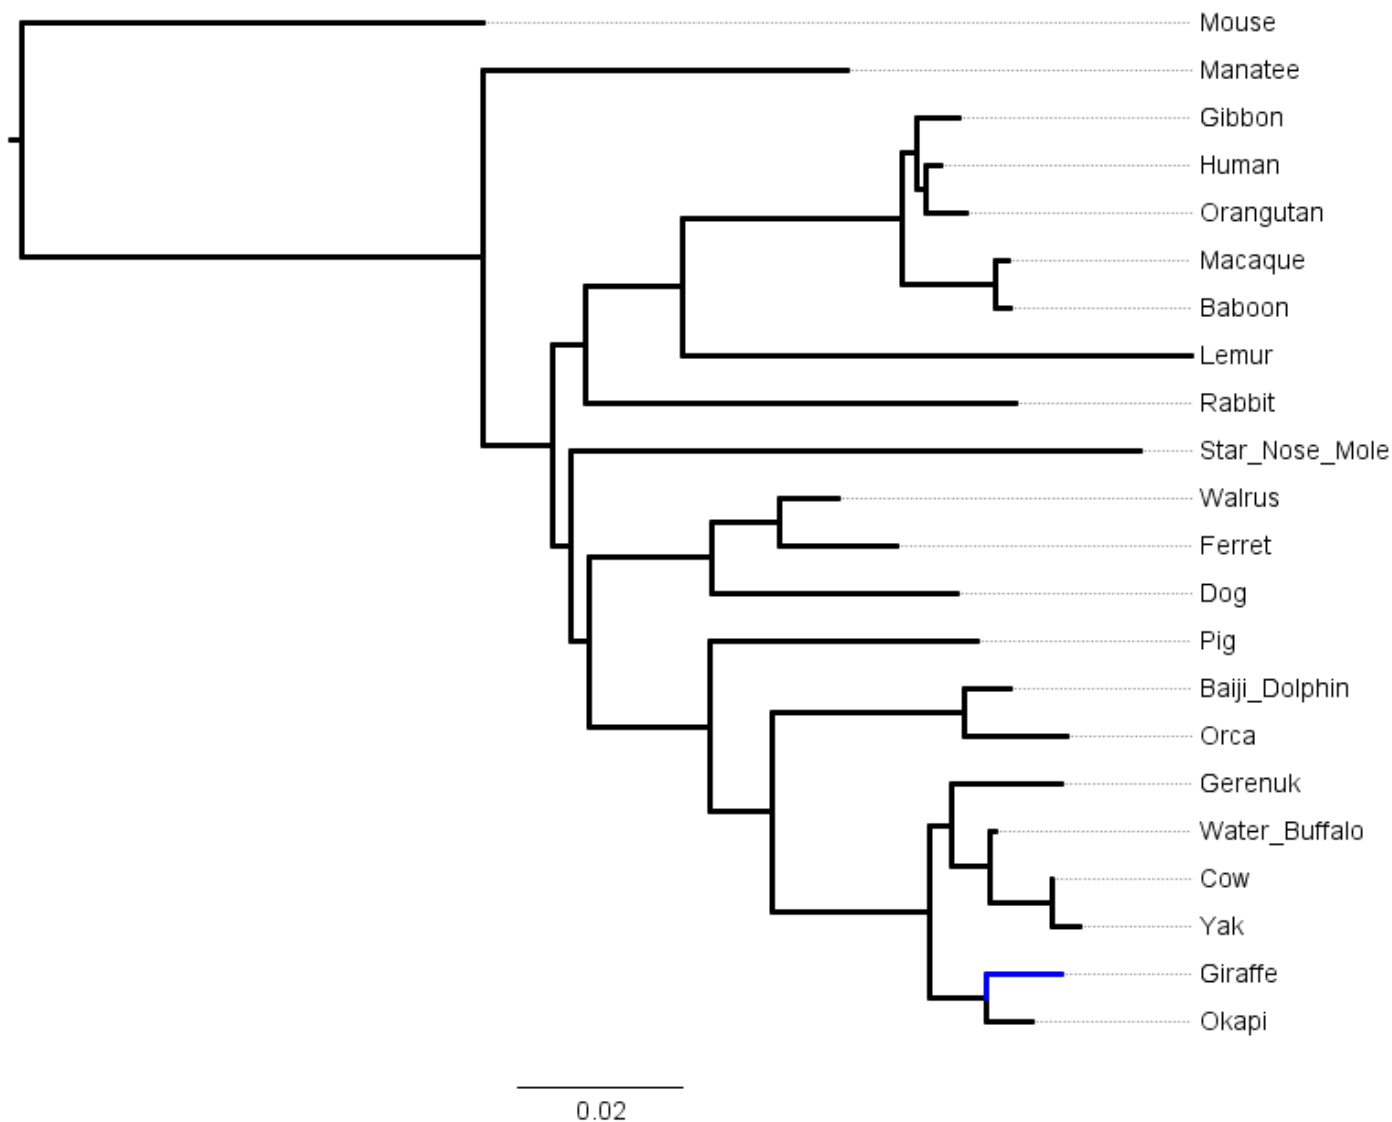

**Locus Name:** Semaphorin 3A (**SEMA3A**)

Locus Name: Monooxygenase DBH-like 1 (MOXD1)

ENSBTAT00000025923 MOXD1-201 monooxygenase dopamine β-hydroxylase dopamine metabolism  
human: episodic memory SNP

PSG: S20K|AGC/AAG

Giraffe: W23L UPS, S40K UPS, P43L UPS, A49V UIS  
Giraffe/Okapi: S606A UPS, W613C UPS  
Okapi: WP 23-24 deletion

**Protein sequence Alignment of Cow, Giraffe and Okapi MOXD1**

|         |     |                                                                |     |
|---------|-----|----------------------------------------------------------------|-----|
| Cow     | 1   | MCRWPLLLWGLLPRAAAGGSGWPFPHRTLLDSEGGKYWLSWGPRGGRLAFRLEVRTAGYV   | 60  |
| Giraffe | 1   | .....F.....L.L.....K..L...Q.V.....                             | 60  |
| Okapi   | 1   | .....-L.....                                                   | 58  |
|         |     |                                                                |     |
| Cow     | 61  | GFGFSSTGAMAAADIVGGVARGRPYLQDYFTNANRELKRKDAQQDYHLEYAMENSTHTVI   | 120 |
| Giraffe | 61  | .....P.....                                                    | 120 |
| Okapi   | 59  | .....P.....                                                    | 118 |
|         |     |                                                                |     |
| Cow     | 121 | EFTRELHTCDINDKSISESTVRVIWAYHHEDVGEAGPKYHESNRGTKSLRLLNPEKTSML   | 180 |
| Giraffe | 121 | ..A.....T.....N..                                              | 180 |
| Okapi   | 119 | ..A.....M.....T.....NT.                                        | 178 |
|         |     |                                                                |     |
| Cow     | 181 | STAIPYFDLVNQDVSIPNKGTTYWCQMFKIPMLQEKHHVIKVEPVIQKGHESLVHHILLY   | 240 |
| Giraffe | 181 | ..V.....P.....                                                 | 240 |
| Okapi   | 179 | ..V.....P.....                                                 | 238 |
|         |     |                                                                |     |
| Cow     | 241 | QCSSNFSDSVLDDGHECYHPNMPDAFLTCETVIFAWAIGGEGFSYPPHVGLSLGTPLDPH   | 300 |
| Giraffe | 241 | .....                                                          | 300 |
| Okapi   | 239 | .....                                                          | 298 |
|         |     |                                                                |     |
| Cow     | 301 | YVLLLEVHYDNPTYKEGLIDNSGLRFLFYTADIRKYDAGVIEAGLWVSLFHTIPPGLPDFRS | 360 |
| Giraffe | 301 | .....                                                          | 360 |
| Okapi   | 299 | .....                                                          | 358 |
|         |     |                                                                |     |
| Cow     | 361 | EGHCTLECLEEAEAEKPSGIHVFAVLLHAHLAARGIRLRHFRKGEEMRLAYDDDFDFN     | 420 |
| Giraffe | 361 | .....                                                          | 420 |
| Okapi   | 359 | .....                                                          | 418 |
|         |     |                                                                |     |
| Cow     | 421 | FQEFQYLKKEEQTILPGDNLITECRYNTKDRARMTWGGLSTRNEMCLSYLLYPRINLTRC   | 480 |
| Giraffe | 421 | .....V.....                                                    | 480 |
| Okapi   | 419 | .....V.....                                                    | 478 |
|         |     |                                                                |     |
| Cow     | 481 | ASIPDIMEQLQFIGVKEIYRPVTTWPFIIKSPKQYRNLSFMDAMNFKWTKKEGLAFNKL    | 540 |
| Giraffe | 481 | .....K.....                                                    | 540 |
| Okapi   | 479 | .....K.....                                                    | 538 |
|         |     |                                                                |     |
| Cow     | 541 | VLSLPVMVRCSTKDNAEWSIQGMTALPPDIERPQAEPLVCGASSTSLRGNVCLELLLSF    | 600 |
| Giraffe | 541 | .....R.....                                                    | 600 |
| Okapi   | 539 | .....D.....R.....H.....                                        | 598 |
|         |     |                                                                |     |
| Cow     | 601 | VVLGSSLSTRSLWP                                                 | 615 |
| Giraffe | 601 | .....A..A...C.                                                 | 615 |
| Okapi   | 599 | .....A..A...C.                                                 | 613 |

**Newick Tree of Mammalian MOXD1**

(Mouse:0.0557461, (Manatee:0.0440954, (((((Gibbon:0.00527691, (Human:0.00179691, Orangutan:0.00474981):0.0012874):0.0015707, (Macaque:0.00144472, Baboon:0.00182327):0.0112338):0.026656, Lemur:0.0614215):0.0117028, Rabbit:0.0519559):0.00396277, (Star Nose Mole:0.0688574, ((Walrus:0.00711941, Ferret:0.0143175):0.00813753, Dog:0.0296408):0.0149364, (Pig:0.0323803, ((Baiji Dolphin:0.00560225, Orca:0.0125361):0.023139, (Giraffe:0.00921503, Okapi:0.00557624):0.00667794, (Gerenuk:0.0134029, (Water Buffalo:0.00067413, (Cow:0, Yak:0.00327022):0.00751611):0.00475624):0.00254256):0.0190802):0.00763236):0.014648):0.00212052):0.00215234):0.00852775):0.0557461);

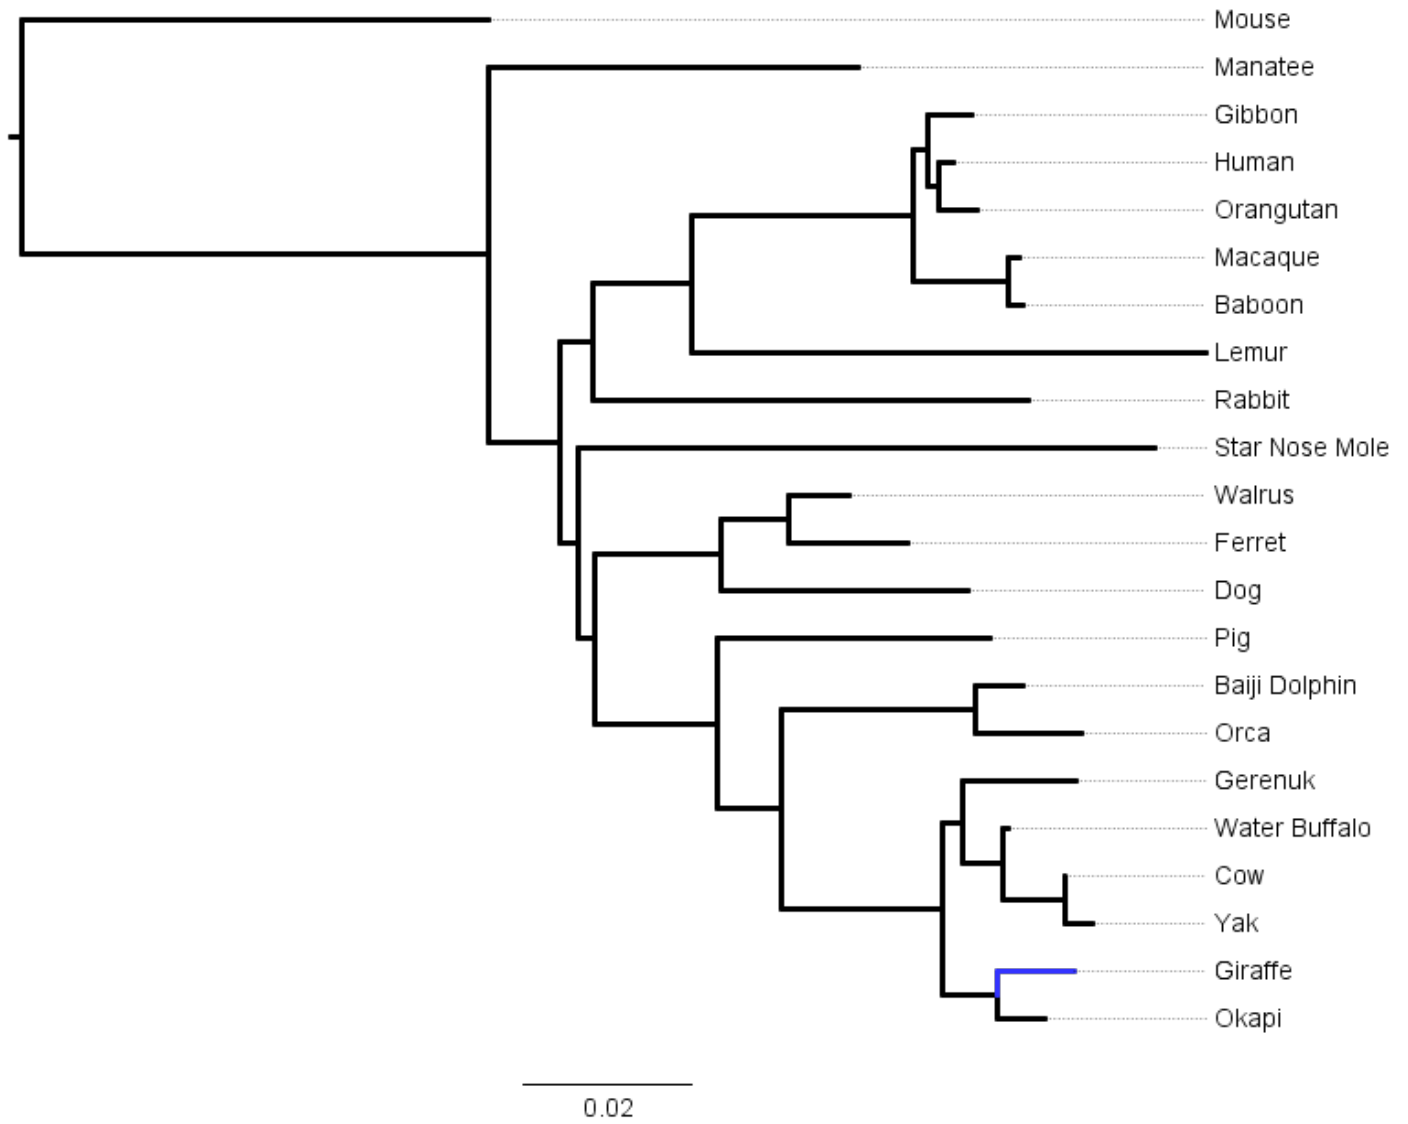

Locus Name: Monooxygenase DBH-like 1 (**MOXD1**)

**Locus Name: Methylenetetrahydrofolate Dehydrogenase (NADP+ Dependent) 1 (MTHFD1)**

ENSBTAT00000012704 MTHFD1-201 C-1-tetrahydrofolate synthase folate metabolism  
 human: SNP association with neural tube defects and congenital heart defects, mouse: knockout is an embryonic lethal and heterozygotes exhibit ventricular septal defects

PP2: (Giraffe) A335V; (Okapi) V754I

Giraffe: A335V UIS, P367L UIS, Q548L UIS, D817N UIS, A893V UIS, A119T UPS, N248D UPS, S266R UPS

Giraffe/Okapi: L717I UIS

**Protein sequence Alignment of Cow, Giraffe and Okapi MTHFD1**

|         |     |                                                               |     |
|---------|-----|---------------------------------------------------------------|-----|
| Cow     | 1   | MAPAEILNGKVVSAQIKERLKNQVIQMKEEVPGFIPGLAILQVGNRDDSPLYINMKLKAA  | 60  |
| Giraffe | 1   | .....TR.R.....T.....                                          | 60  |
| Okapi   | 1   | .....TR.R.....T.....                                          | 60  |
| Cow     | 61  | EEIGIKATHIKLPRATASEVLKICITSLNEDLTVHGFIVQLPLDSENPIETLVNAIAP    | 120 |
| Giraffe | 61  | ..V.....M.....T.....                                          | 120 |
| Okapi   | 61  | ..V....K....S.R.....V..                                       | 120 |
| Cow     | 121 | EKDVDGLNSISAGKLARGDLSNCFIPCTPKGCLELIKETGVQIAGRHAVVVGRSKIVGAP  | 180 |
| Giraffe | 121 | .....                                                         | 180 |
| Okapi   | 121 | .....                                                         | 180 |
| Cow     | 181 | MHDLNHNHATVTTCHSKTANLKEEISKDILVVAAGQPEMVKGWIKPGAIVIDCGINY     | 240 |
| Giraffe | 181 | .....N.....I.....                                             | 240 |
| Okapi   | 181 | .....N..V.....V.....                                          | 240 |
| Cow     | 241 | VTDDTKPNGKKIVGDVAYTEAKERASFITVPPGGVGPMTVAMLMQSTVESAKRFLENFKP  | 300 |
| Giraffe | 241 | .P....D...V.....L.....R.....K..T                              | 300 |
| Okapi   | 241 | .P....G...V...V.L.....K...                                    | 300 |
| Cow     | 301 | GKWIIQYNKLNKTPVPSDIDISRSYKPKPIGNLAREVGLRTEEVELYGETKAKVLLSAL   | 360 |
| Giraffe | 301 | .N.M....T.....S..V..I.....D.....V.                            | 360 |
| Okapi   | 301 | .N.M....T.....S.....I.....D.....                              | 360 |
| Cow     | 361 | ERLKHQPDGKYVVVTGITPTPLGEGKSTTTIGLVQALGTHLHQNVFACVRQPSQGPTFGI  | 420 |
| Giraffe | 361 | .....L.....A..L.....                                          | 420 |
| Okapi   | 361 | .W.....A.....                                                 | 420 |
| Cow     | 421 | KGGAAGGGYSQVIPMEEFNHLTGDIAITAANNLVAAAIDARMFHEETQTDKALFNRLV    | 480 |
| Giraffe | 421 | .....                                                         | 480 |
| Okapi   | 421 | .....                                                         | 480 |
| Cow     | 481 | PSVNGVRKFSDIQIRRLRRLGIEKTDPATLTDEEINRFARLDIDPETITWQRVLDTNDRF  | 540 |
| Giraffe | 481 | .....                                                         | 540 |
| Okapi   | 481 | .....                                                         | 540 |
| Cow     | 541 | LRKITIGQAPTEKGHRSRTAQFDISVASEIMAVLALTSSLEDMRERLGKMOVASSKKGEPI | 600 |
| Giraffe | 541 | .....L.....                                                   | 600 |
| Okapi   | 541 | .....N.....S.....                                             | 600 |
| Cow     | 601 | STEDLGVSGALTVLMKDAIKPNLMQTLGTPVVFVHAGPFANIAHGSSIIADRIALKLVG   | 660 |
| Giraffe | 601 | .....V.....                                                   | 660 |
| Okapi   | 601 | .....                                                         | 660 |
| Cow     | 661 | PEGFVVTEAGFGADIGMEKFFNIKCRYSGLRPHVVVLVATVRALKMHGGGPTVTAGLPLP  | 720 |
| Giraffe | 661 | .....I...                                                     | 720 |
| Okapi   | 661 | .....I...                                                     | 720 |
| Cow     | 721 | KAYIEEDLELVGKGFNSLKKQIENARMFVPPVVAVNAFKTDTEAELDLVSRLAKEHGAF   | 780 |
| Giraffe | 721 | .....E.....                                                   | 780 |
| Okapi   | 721 | ...V.....E.....I.....                                         | 780 |
| Cow     | 781 | DAVKCTHWAEGGKALALAEAVQRAAAPSSFQLLYDLKLPVEDKIRIIAQKIYGADNIE    | 840 |
| Giraffe | 781 | .....R.....N.....I.....D..                                    | 840 |
| Okapi   | 781 | .....K.....D..                                                | 840 |

|         |     |                                                            |     |
|---------|-----|------------------------------------------------------------|-----|
| Cow     | 841 | LLPEAQHKAEVYTKQGFGNLPICMAKTHLSLSHNPGLKGVPTGFVLPDIRASVGAGFL | 900 |
| Giraffe | 841 | .....V.....                                                | 900 |
| Okapi   | 841 | .....V.....V.....                                          | 900 |
|         |     |                                                            |     |
| Cow     | 901 | YPLVGTMSTMPGLPTRPCFYDIDLDPETEQVNGLF                        | 935 |
| Giraffe | 901 | .....                                                      | 935 |
| Okapi   | 901 | .....                                                      | 935 |

**Newick Tree of Mammalian MTHFD1**

```
(lemur:0.0233642, ((elephant:0.0326464, (human:0.0104222,
rhesus_mokey:0.0123203):0.0218542):0.0037219, ((horse:0.0220978, rhino:0.021639):0.00637611,
(walrus:0.0175229, (dog:0.0142511,
cat:0.0150552):0.00154813):0.00367981):0.00207875):0.000659632, (pig:0.0301979,
(camel:0.00368962, alpaca:0.00490345):0.0306392, (orca:0.0240727, ((cow:0.003035,
yak:0.000178719):0.00422325, (tibetan_antelope:0.00668483, (sheep:0.00352919,
goat:0.00183277):0.00192923):0.00496905):0.00714463, (giraffe:0.0163896,
okapi:0.0139862):0.0110166):0.0144768):0.00232705):0.00182985):0.00446379):0.0233642);
```

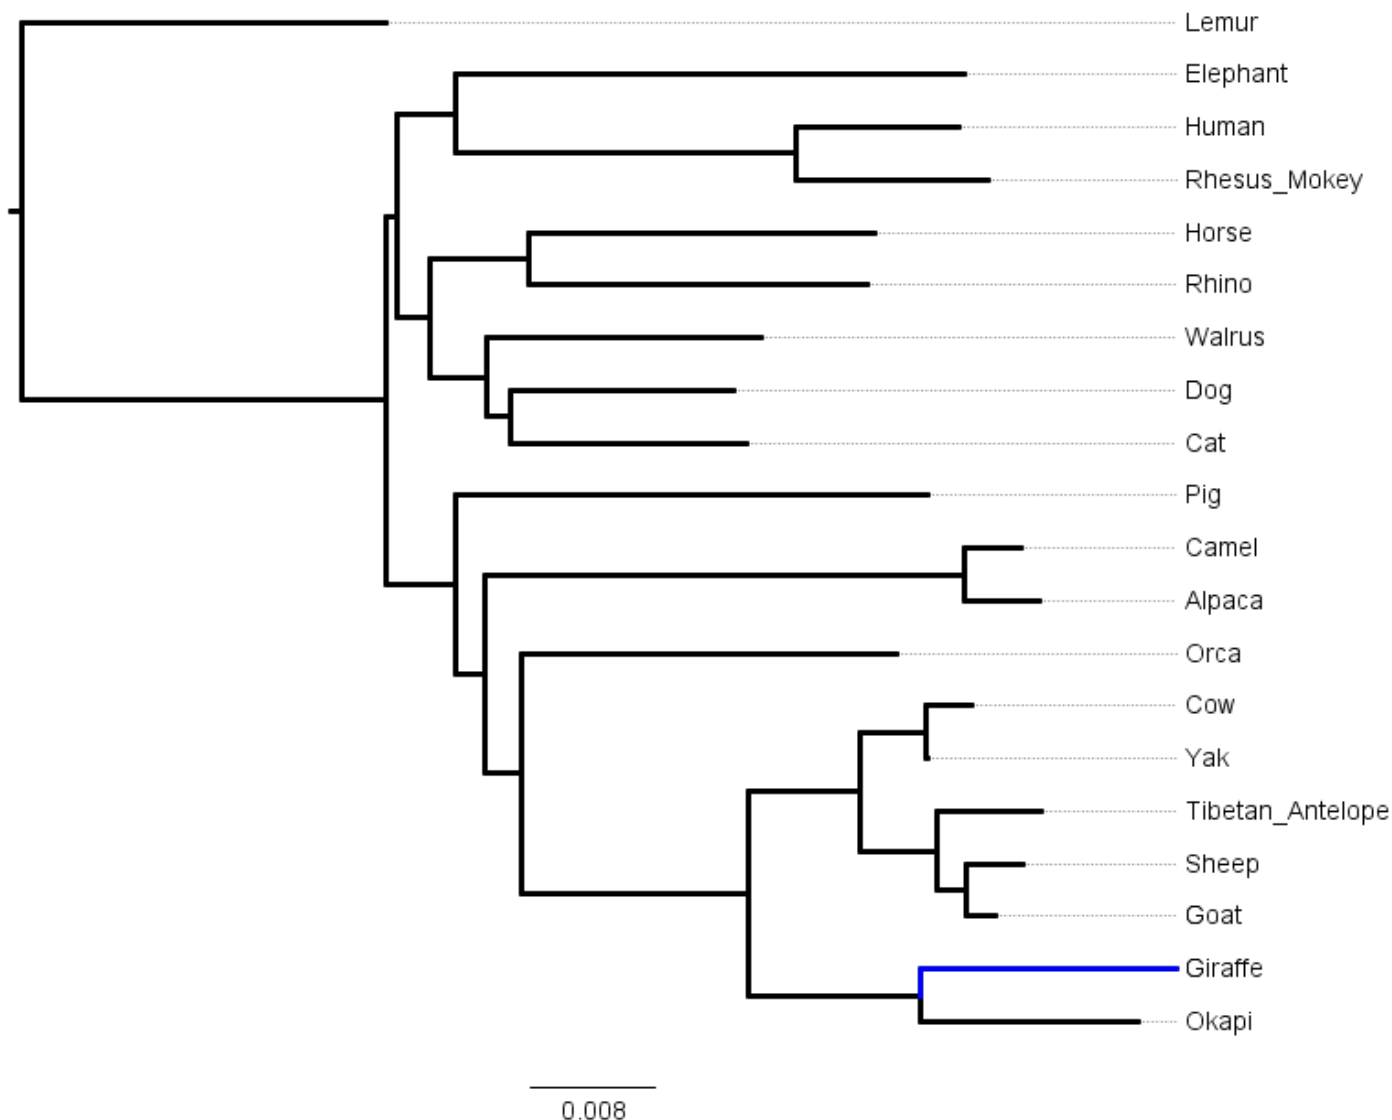

**Locus Name: Methylenetetrahydrofolate Dehydrogenase (NADP+ Dependent) 1 (MTHFD1)**

**Locus name: SLC17A1**

ENSBTAT0000064064 SLC17A1-201 phosphate-sodium cotransporter kidney  
no mutation in m/h described; human SNP for cholesterol homeostasis and hyperhomocysteinaemia

Giraffe: I142V UPS, G168A UPS, I204V UIS  
Giraffe/Okapi: T263V UPS, S283G UPS, A365G, L389V UIS

**Protein sequence Alignment of Water Buffalo, Giraffe and Okapi SLC17A1**

|               |     |                                                               |     |
|---------------|-----|---------------------------------------------------------------|-----|
| Water Buffalo | 1   | MQVDNQVSPGKVPYFCSVRYGIAVFLLLCNVIIMSQRVCLSLTMIAMVNSTEPHGLSNTS  | 60  |
| Giraffe       | 1   | .....R.....I.....V.....M.....                                 | 60  |
| Okapi         | 1   | .....R.....I.....M.....                                       | 60  |
|               |     |                                                               |     |
| Cow           | 61  | TKELQDNIKNPVYNWSTEIQGIMLSSIFYGVLISQIPAGYLSGIYSLKMKMIGFALLLSSL | 120 |
| Giraffe       | 61  | .....                                                         | 120 |
| Okapi         | 61  | .....                                                         | 120 |
|               |     |                                                               |     |
| Cow           | 121 | FTLLLPLAAEFGEILVVICRVIKGLFQGITLTTQQVWIKWAPPELGRLTALSLSGLLL    | 180 |
| Giraffe       | 121 | .....TW.....V.....A.....IA...S.....                           | 180 |
| Okapi         | 121 | .....T.....V..V.....S.....                                    | 180 |
|               |     |                                                               |     |
| Cow           | 181 | GPCIVLLITGFICDSLWPMVFIYFACGCALSVLWLFILFYEDPKDHPFISNREKEYITS   | 240 |
| Giraffe       | 181 | .....V.....F.....Y..I.....                                    | 240 |
| Okapi         | 181 | .....F.....Y..I.....                                          | 240 |
|               |     |                                                               |     |
| Cow           | 241 | ALTQQVSSSTLIKVPKAMLKSTPLWVISLCNFAFFWSNTFLSIYIPIYIDYKLHVDVEE   | 300 |
| Giraffe       | 241 | .....S...V.....S.....G..T.L.....N.K.                          | 300 |
| Okapi         | 241 | .....S...V.....G..T.....N.K.                                  | 300 |
|               |     |                                                               |     |
| Cow           | 301 | NGLLSSPLHLFAWIFAVLAGYMADIFQTRNTFSLVTIRKLFSTLGLLLPSLFLSLCLLYLS | 360 |
| Giraffe       | 301 | .....G..IS.....I.....T.....                                   | 360 |
| Okapi         | 301 | .....G.....I.....T.....                                       | 360 |
|               |     |                                                               |     |
| Cow           | 361 | SSYYATIIFLILANSTGFSFAMGGIINVLVDIAPRYYGFLRGITNVIGLTGGLIASVTGI  | 420 |
| Giraffe       | 361 | .NF.G.....A.....LM...V.....V.....A.....                       | 420 |
| Okapi         | 361 | .NF.G.....A.....LM...V.....                                   | 420 |
|               |     |                                                               |     |
| Cow           | 421 | ILSEDAESPWLKIFLLMIANNMISLIFYLIFAKAEVQEWAKERQNTYL              | 468 |
| Giraffe       | 421 | .....A.....F...G.....D.....                                   | 468 |
| Okapi         | 421 | ...K.....F.....D.....                                         | 468 |

**Newick Tree of Mammalian SLC17A1**

((mouse:0.0421916, rat:0.0549928):0.103869, ((orangutan:0.00219056, human:0.0282513):0.14669, (((walrus:0.0263727, panda:0.0491226):0.00835653, polecat:0.0695857):0.0405544, tiger:0.146416):0.086042, (horse:0.191911, ((alpaca:0.0133032, camel:0.0329261):0.110951, (pig:0.118924, ((minke\_whale:0.0101336, orca:0.00941223):0.00187525, sperm\_whale:0.0289616):0.0522884, (((sheep:0.00399679, goat:0.00243415):0.00621533, tibetan\_antelope:0.00890019):0.00599475, (water\_buffalo:0.0147732, (yak:8.59446e-05, cow:0.00634499):0.0112915):0.0066585):0.00990888, (giraffe:0.0293547, okapi:0.0075743):0.0203731):0.0898591):0.0199903):0.0135566):0.0967838):0.0160838):0.019755):0.103869);

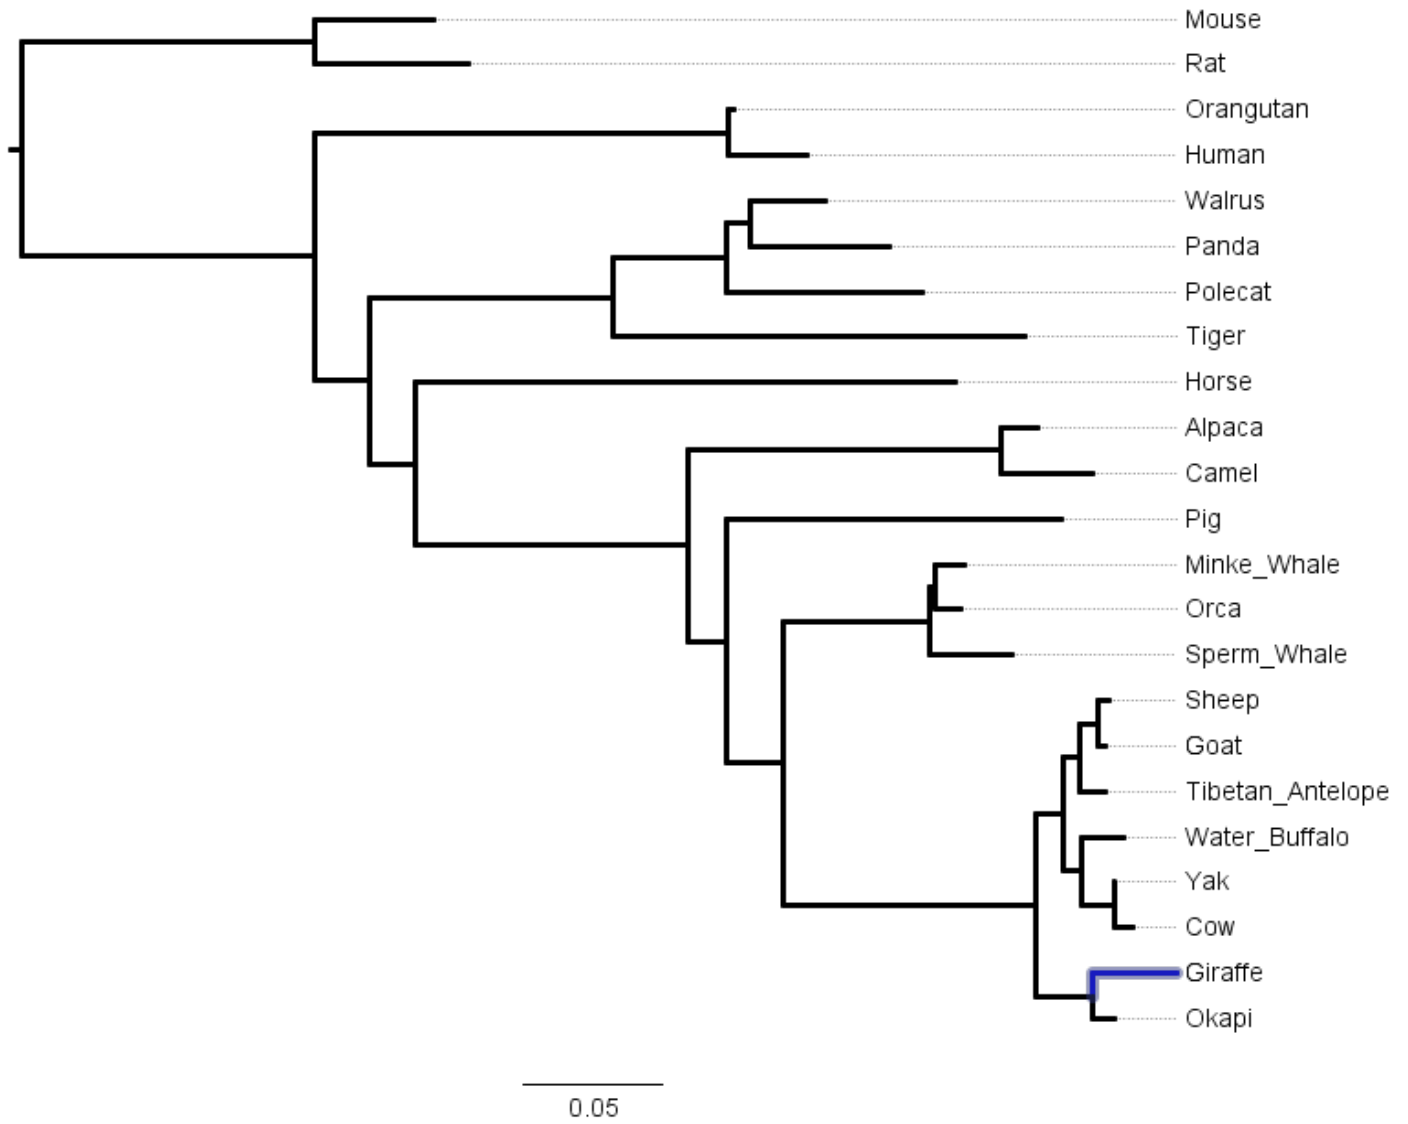

**Locus name: SLC17A1**



**Locus name:** Succinic semialdehyde dehydrogenase (**ALDH5A1**)

ENSBTAT0000029203 ALDH5A1-201 succinic semialdehyde dehydrogenase brain, clearance of GABA and hydroxybutyric acid  
human: mental retardation, ataxia, seizures humans; mouse: reduced body weight, ataxia, seizures, gliosis of the hippocampus, and early death.

PP2: (Giraffe) A34I, V95M  
Giraffe: R8L UPS, P31A UPS, V86M UPS, K402R UIS

**Protein sequence Alignment of Cow, Giraffe and Okapi ALDH5A1**

|         |     |                                                                |     |
|---------|-----|----------------------------------------------------------------|-----|
| Cow     | 1   | MATCLRLRSCAAPHLRRAPPSRICRPRADCPVAPIRGYARGPAGLSSALLRTDGFVGGGLW  | 60  |
| Giraffe | 1   | .....L.RP..C.....V.....A.....L.....                            | 60  |
| Okapi   | 1   | .....PS.Y.....QV...H.....                                      | 60  |
|         |     |                                                                |     |
| Cow     | 61  | VSAATFPVHDPASGAELGLVADCGVPEARAAVRAAYEAFCSWRGVS AKERSLLRKWYD    | 120 |
| Giraffe | 61  | .....M.....                                                    | 120 |
| Okapi   | 61  | .....                                                          | 120 |
|         |     |                                                                |     |
| Cow     | 121 | LMIQNKDDLAKIITAESGKPLKEAQGEILYSANFLEWFSEEARRVYGDIIISTPAKERRAL  | 180 |
| Giraffe | 121 | .....                                                          | 180 |
| Okapi   | 121 | .....                                                          | 180 |
|         |     |                                                                |     |
| Cow     | 181 | VLKQPVGVAAVITPWNFP SAMITRKVGAALAAGCTVVVKPAEDTPFSALALAE LANQAGI | 240 |
| Giraffe | 181 | .....L....I.....                                               | 240 |
| Okapi   | 181 | .....L.....                                                    | 240 |
|         |     |                                                                |     |
| Cow     | 241 | PPGVYNVIPCSQKKAKEVGEALCTDPLVSKISFTGSTATGKVLLHHAANSVKRVS MELGG  | 300 |
| Giraffe | 241 | .....                                                          | 300 |
| Okapi   | 241 | .....                                                          | 300 |
|         |     |                                                                |     |
| Cow     | 301 | HAPFIVFDSANVDQAVAGAMASKFRNSGQTCVCSNRFLVQSGIHDSFVKKFAEAIKTNLH   | 360 |
| Giraffe | 301 | .....                                                          | 360 |
| Okapi   | 301 | .....                                                          | 360 |
|         |     |                                                                |     |
| Cow     | 361 | VGNGFDERTTQGPLINAKAVEKVEKHVSDAISKGATVVTGGKRHHVGKNFFEPTLLSNVT   | 420 |
| Giraffe | 361 | .....E.....A.....R..Q.....                                     | 420 |
| Okapi   | 361 | .....E.....A.....Q.....                                        | 420 |
|         |     |                                                                |     |
| Cow     | 421 | RDMLCSQEETFPGVPVPIKFNTEEEEAVAIANAANVGLAGYFYSQDPAQIWRVAERLEVGM  | 480 |
| Giraffe | 421 | .....D.....                                                    | 480 |
| Okapi   | 421 | .....D.....                                                    | 480 |
|         |     |                                                                |     |
| Cow     | 481 | VGVNEGLISSVECPFGGVKQSGLGREGSKYGIDEYLELKYVCFGGL                 | 527 |
| Giraffe | 481 | .....                                                          | 527 |
| Okapi   | 481 | .....                                                          | 527 |

**Newick Tree of Mammalian ALDH5A1**

(mouse:0.0385124, (rabbit:0.0560646, ((bushbaby:0.063082, (rhesus\_monkey:0.0130375, human:0.0231304):0.04769):0.00264939, ((rhino:0.0515391, aardvark:0.0698163):0.00643962, (walrus:0.0459987, (pig:0.048716, ((orca:0.00366381, dolphin:0.00396989):0.00213718, baiji\_dolphin:0.00551862):0.0163367, ((cow:0.00160601, water\_buffalo:0.00411377):0.00756038, (giraffe:0.0146236, okapi:0.00647175):0.00455776):0.0185197):0.00768945):0.0213988):0.00733916):0.0129637):0.00610414):0.0385124);

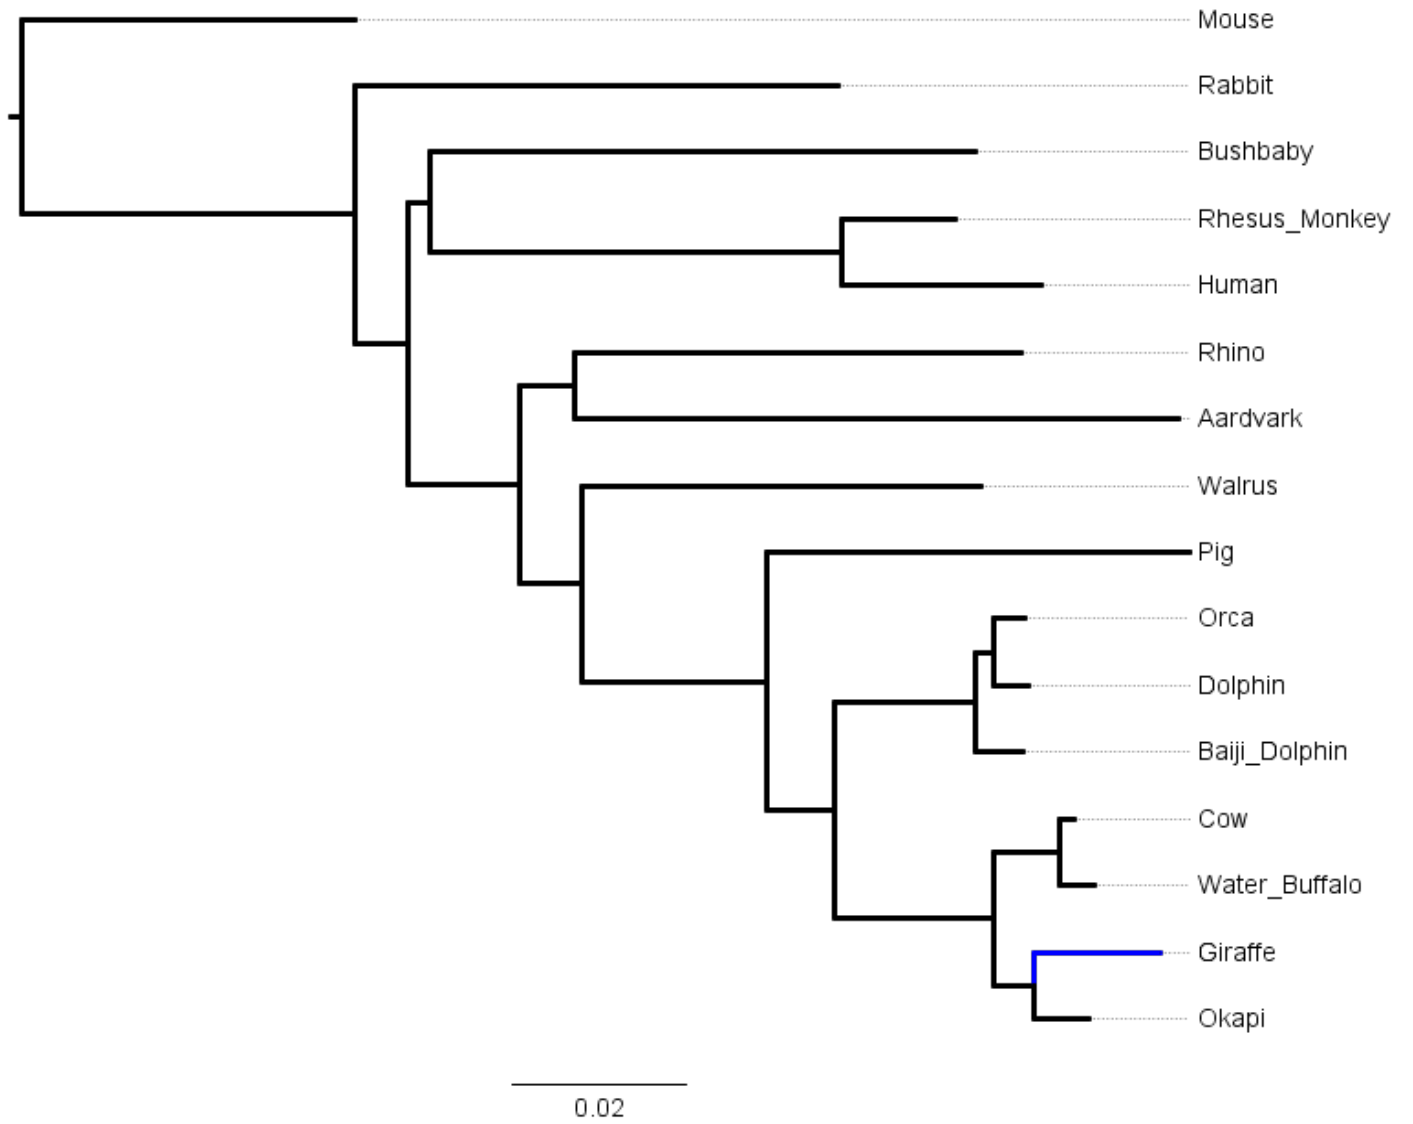

**Locus name:** Succinic semialdehyde dehydrogenase (**ALDH5A1**)

Locus Name: 3-hydroxyisobutyrate dehydrogenase **HIBADH (3HIDH)**

ENSBTAT0000001374 HIBADH-201 3-hydroxyisobutyrate dehydrogenase mitochondrial, amino acid degradation  
no mutation in m/h described

PP2: (Giraffe) A10V  
Giraffe: A10V UPS, D265E UIS, D291E UPS

**Protein sequence Alignment of Cow, Giraffe and Okapi HIBADH**

|         |     |                                                              |     |
|---------|-----|--------------------------------------------------------------|-----|
| Cow     | 1   | MAASLRLRGAASGLRYWSRRQPPAVASLAAVCSRSMASKTPVGFIFVGNMGNPMAKNLMK | 60  |
| Giraffe | 1   | .....V.....                                                  | 60  |
| Okapi   | 1   | .....                                                        | 60  |
|         |     |                                                              |     |
| Cow     | 61  | HGYPLIIYDVFPDACKEFLDAGEQVVSFPADVAEKADRIITMLPTSINAIEAYSGANGIL | 120 |
| Giraffe | 61  | .....                                                        | 120 |
| Okapi   | 61  | .....                                                        | 120 |
|         |     |                                                              |     |
| Cow     | 121 | KKVKKGSLIDSSTIDPMVSKELAKEVEKMGAVFMDAPVSGGVAARSGNLTFMVGGVEE   | 180 |
| Giraffe | 121 | .....                                                        | 180 |
| Okapi   | 121 | .....                                                        | 180 |
|         |     |                                                              |     |
| Cow     | 181 | EFAAAQELLGCMGSNVVYCGAVGTGQAAKICNNLLLAISMIGTAEAMNLGIRLGLDPKLL | 240 |
| Giraffe | 181 | .....                                                        | 240 |
| Okapi   | 181 | .....                                                        | 240 |
|         |     |                                                              |     |
| Cow     | 241 | AKILNMSSGRCWSSDTYNPVPVMDGVPSANNYQGGFGTTLMAKDLGLAQDSATSTKSPI  | 300 |
| Giraffe | 241 | .....TE.....E.....                                           | 300 |
| Okapi   | 241 | .....I.....                                                  | 300 |
|         |     |                                                              |     |
| Cow     | 301 | LLGSQAHQIYRMMCAKGYSKKDFSSVFQFLREETF                          | 336 |
| Giraffe | 301 | .....                                                        | 336 |
| Okapi   | 301 | .....                                                        | 336 |

**Newick Tree of Mammalian HIBADH**

```
((rat:0.0159911, mouse:0.0204952):0.024398, (manatee:0.0452255, (bush_baby:0.0400822, ((human:0.000360217, orangutan:0.00262042):0.00063753, (baboon:0.000153016, rhesus_monkey:0.00282762):0.0053529):0.0125365, (cat:0.0188311, ((panda:0.000329437, (walrus:0, weddel_seal:0):0.00863935):0.00257591, dog:0.00643383):0.00234697):0.00171167, (horse:0.0149812, rhino:0.0275912):0.00590892, (camel:0.00306073, alpaca:0.00290947):0.00900709, (baiji_dolphin:0.00284379, (minke_whale:0.0029966, orca:0):5.56646e-05, sperm_whale:0.00592352):0.000143565):0.00351705, (sheep:0, (yak:0.00296328, (cow:0, (giraffe:0.0104891, okapi:0.00145161):0.00154322):3.97966e-05):0.000191481):0.0025478):0.00617726):0.0101173):0.00149611):0.00426352):0.00304448):0.00510457):0.024398);
```

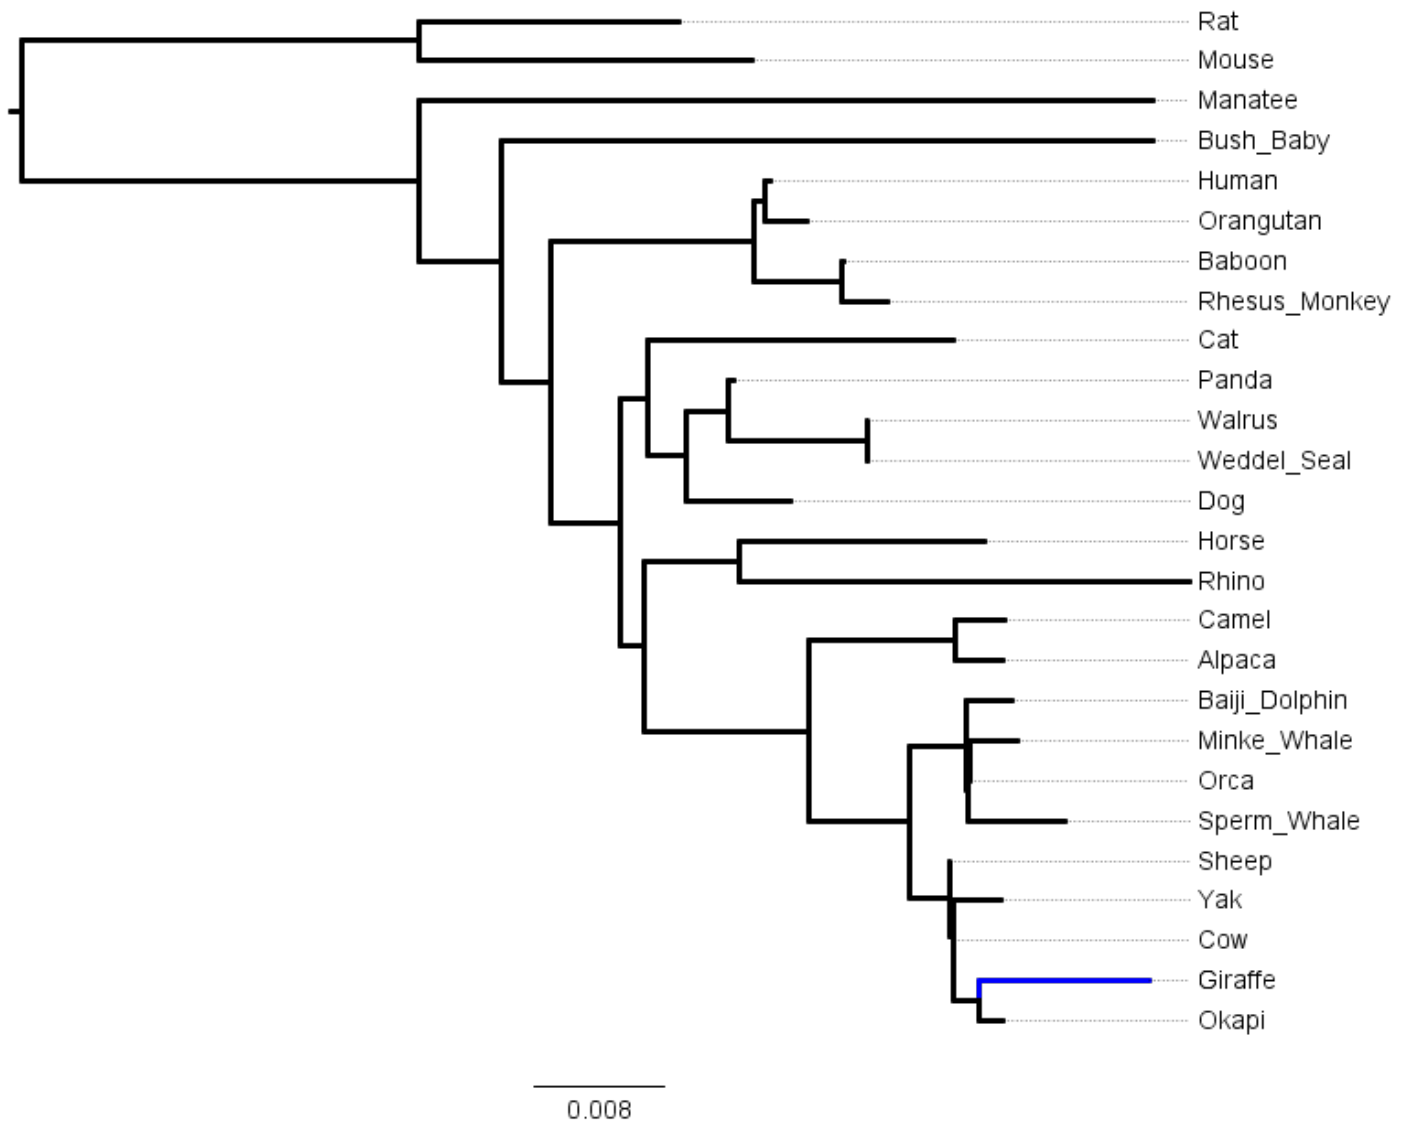

Locus Name: 3-hydroxyisobutyrate dehydrogenase **HIBADH (3HIDH)**

**Locus Name:** Monocarboxylic acid transporter 1, (SLC16A1; MCT1)

ENSBTAT0000020102 SLC16A1-201 monocarboxylate transporter rumen epithelium, transport volatile fatty acids, butyrate  
human: Symptomatic deficiency in lactate transport (SDLT) [MIMOUSE:245340]: Deficiency of lactate transporter may result in an acidic intracellular environment created by muscle activity with consequent degeneration of muscle and release of myoglobin and creatine kinase.

PP2: (Giraffe) G192E, A335P

Giraffe: G192E UIS, F246L UIS, W324R UPS, A335P UIS

Giraffe/Okapi: I171T UIS

**Protein sequence Alignment of Cow, Giraffe and Okapi MCT1**

|         |     |                                                               |     |
|---------|-----|---------------------------------------------------------------|-----|
| Cow     | 1   | MPPAVGGPVGYPDPDGGWGWAVVIGAFISIGFSYAFPKSITVFFKEIEGIFNATTSEVSW  | 60  |
| Giraffe | 1   | .....V.....                                                   | 60  |
| Okapi   | 1   | .....V.....                                                   | 60  |
|         |     |                                                               |     |
| Cow     | 61  | ISSIMLAVMYGGPISSVLVKNKYSRPVMIVGGILSGSGLIAASFCNTVQELYFSVGVIG   | 120 |
| Giraffe | 61  | .....F..                                                      | 120 |
| Okapi   | 61  | .....F..                                                      | 120 |
|         |     |                                                               |     |
| Cow     | 121 | GLGLAFNLNPALTMIGKYFYKRRPLANGLAMAGSPVFLSTLAPLNQAFFMIYGWRGSFLI  | 180 |
| Giraffe | 121 | .....T.....                                                   | 180 |
| Okapi   | 121 | .....F.....T.....                                             | 180 |
|         |     |                                                               |     |
| Cow     | 181 | LGLLLLNCCVAGALMRPIGPKPTTAEKEKSKGSLQEAGKYETKKGASDANTDLIGGNPKE  | 240 |
| Giraffe | 181 | .....E.....                                                   | 240 |
| Okapi   | 181 | .....                                                         | 240 |
|         |     |                                                               |     |
| Cow     | 241 | EKKSIFQTLNFTFLDLSLFKHRGFLLYLSGNVLMFFGLFTPLVFLSNYGKSKHYSSEKAAF | 300 |
| Giraffe | 241 | .....L.....F.....                                             | 300 |
| Okapi   | 241 | .....F.....                                                   | 300 |
|         |     |                                                               |     |
| Cow     | 301 | LLSILAFVDMVARPSMGLVANTKWVRPRVQYFFAASIIANGLCHLAAPLSSTYIELCIYA  | 360 |
| Giraffe | 301 | .....RI.....P..V.....                                         | 360 |
| Okapi   | 301 | .....I.....V.....                                             | 360 |
|         |     |                                                               |     |
| Cow     | 361 | GFFGFAGWLSSVLFETLMDLVGPQRFSSAVGLVTIVECCPVLLGPPVLGRLNDIYGDYK   | 420 |
| Giraffe | 361 | .....                                                         | 420 |
| Okapi   | 361 | .....                                                         | 420 |
|         |     |                                                               |     |
| Cow     | 421 | YTYWACGIILIVAGIYLFIMGINYRLLLEKEQKAQKQKESKDEETNVDVAEKPKPEVID   | 480 |
| Giraffe | 421 | .....A.....G.E.....T.                                         | 480 |
| Okapi   | 421 | .....A.....G.E.....T.                                         | 480 |
|         |     |                                                               |     |
| Cow     | 481 | AAESPEHKATEEDPKEAESPV                                         | 502 |
| Giraffe | 481 | .....I.V.....                                                 | 502 |
| Okapi   | 481 | .....I.V.....                                                 | 502 |

**Newick Tree of Mammalian MCT1**

(mouse:0.0366203, ((baboon:0.00234744, rhesus:0.00166059):0.016673, (human:0.00488244, orangutan:0.00516807):0.00676165):0.0578562, (manatee:0.0401926, elephant:0.0346005):0.00957182, ((tiger:0.00272322, cat:0.00129286):0.0189166, (walurs:0.0162081, dog:0.012311):0.0105875):0.00718989, ((horse:0.0313634, rhino:0.0220628):0.00614059, ((camel:0.000177447, alpaca:0.00582861):0.0241509, (dolphin:0.000964546, orca:0.00103346):0.0220117):0.00336736, (pig:0.0255272, ((gerenuk:0.0101736, tibetantlp:0.00632708, (goat:0.00205463, sheep:0.00395143):0.00372973):0.00600986):0.00229364, ((cow:0.00200294, yak:0.00199708):0.0018109, waterbuf:0.000189113):0.00578455):0.00395114, (giraffe:0.00821691, okapi:0.00179335):0.0138139):0.05178):0.00113645):0.0113143):0.00418234):0.00638919):0.0168504):0.0366203);

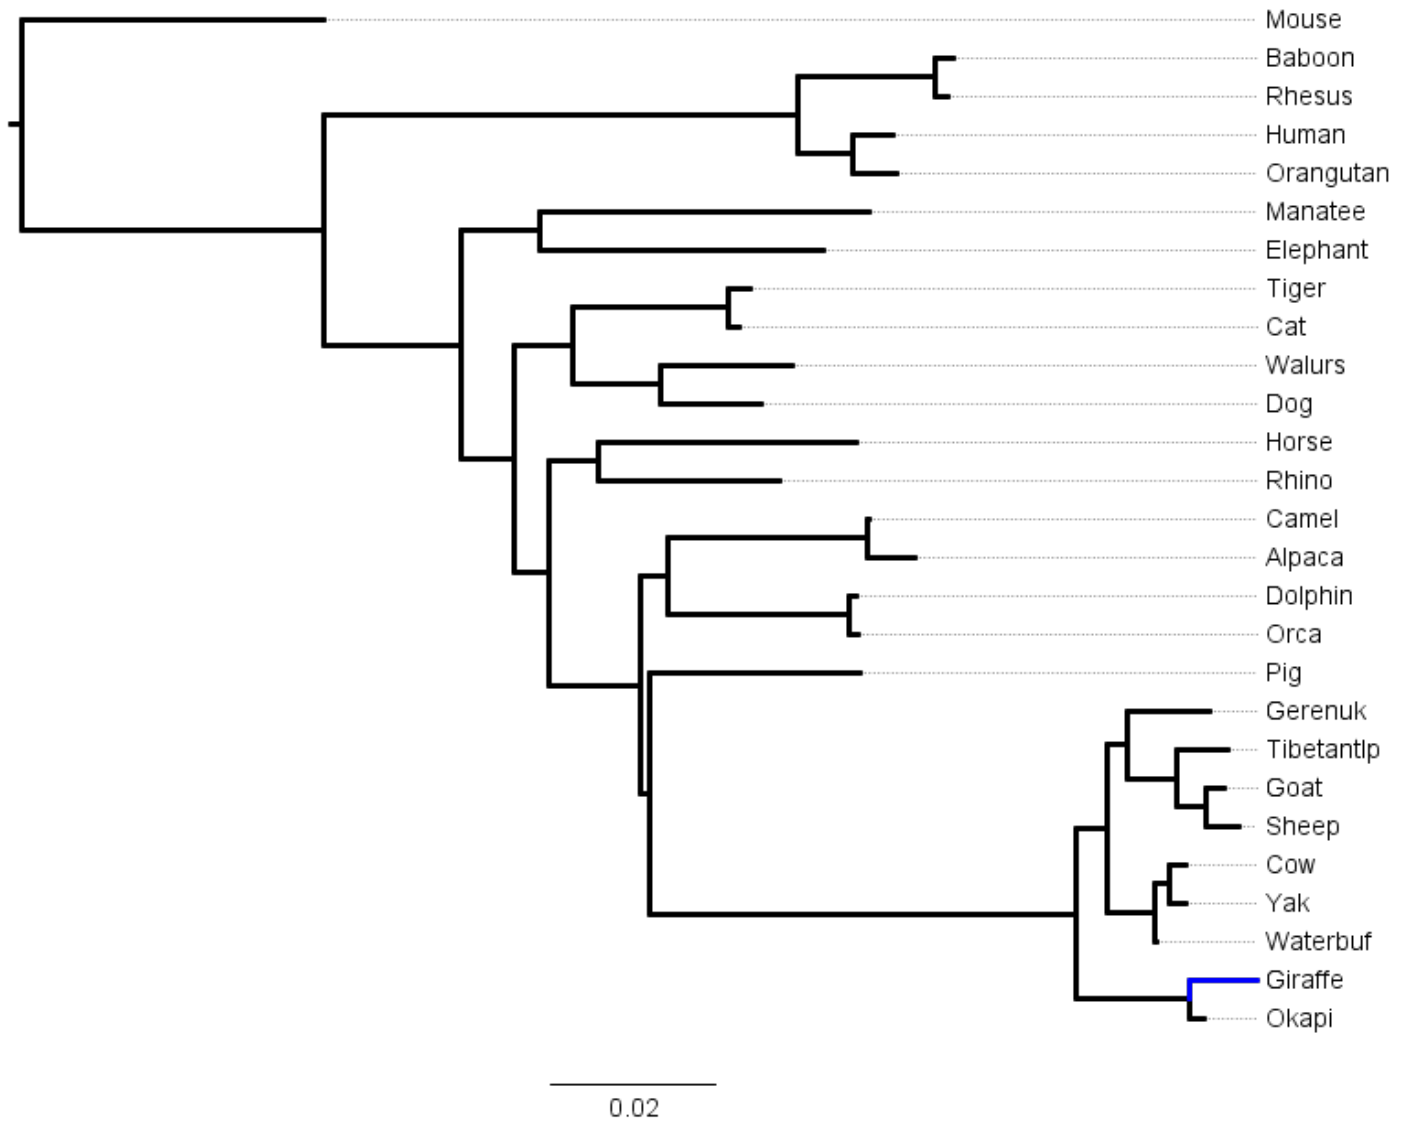

**Locus Name:** Monocarboxylic acid transporter 1, (**SLC16A1**; **MCT1**)

**Locus Name: Acyl-CoA Synthetase Medium-Chain Family Member 3 (ACSM3)**

ENSBTAT0000008455 ACSM3-201 acyl-CoA synthetase medium-chain mitochondrial  
mouse: deficiency is asymptomatic

PP2: All benign

Giraffe: K217T UIS, T433S UPS

Giraffe/Okapi: F246Y UIS, V282L UPS, F283Y UIS, A320P UIS, S345T UIS, N543S UPS

**Protein sequence Alignment of Cow, Giraffe and Okapi ACSM3**

|         |     |                                                               |     |
|---------|-----|---------------------------------------------------------------|-----|
| Cow     | 1   | MKILLCAKYFQCPVIPGSMRALHKDYRTVTPQNFSNYESMKQDFKLEIPEYFNFAKDVL   | 60  |
| Giraffe | 1   | ....R.....LA.....D.....                                       | 60  |
| Okapi   | 1   | ....R.....LA.....                                             | 60  |
|         |     |                                                               |     |
| Cow     | 61  | QWTSMEKAGKKPSNPAFWWTNGNGEEVRSFEELGSLSRKFANILTEACGLQRGDRVILL   | 120 |
| Giraffe | 61  | ..N.....R.....I.....VI                                        | 120 |
| Okapi   | 61  | ..N.....R.....I.....VI                                        | 120 |
|         |     |                                                               |     |
| Cow     | 121 | LPRIPEWWLANIACLRTGTVLIPGTTQMTQKDILYRLQSSKAKCIITNEVLAPAVDAVAS  | 180 |
| Giraffe | 121 | ..K.....                                                      | 180 |
| Okapi   | 121 | .....                                                         | 180 |
|         |     |                                                               |     |
| Cow     | 181 | KCENLHSLKLVQSPPREGWENLKEMMKHASDNHTCVKTKHNEMMAIFFTSGTSGYPKMTG  | 240 |
| Giraffe | 181 | .....D..Q.....T.....S.....                                    | 240 |
| Okapi   | 181 | .....S.....                                                   | 240 |
|         |     |                                                               |     |
| Cow     | 241 | HTHSSFGLGLSINGRFWLDLTPLDVMWNTSDTGWAKSAWSSVFPWIQACVFAHYLPRF    | 300 |
| Giraffe | 241 | ....Y.....LY.....                                             | 300 |
| Okapi   | 241 | ....Y.....LY.....                                             | 300 |
|         |     |                                                               |     |
| Cow     | 301 | EPTSILQTLKFPITVFCAPTAYRMLVQNDKASYKFKSLKHCVSAGEPINPEVTEQWRN    | 360 |
| Giraffe | 301 | .....P.....T.....                                             | 360 |
| Okapi   | 301 | .....P.....T.....                                             | 360 |
|         |     |                                                               |     |
| Cow     | 361 | RTGLDIYEGYQGTETVLIICGNFKGMKIKPGSMGKPSPAFDVKILDVNGNVLPKGEGDIG  | 420 |
| Giraffe | 361 | .....                                                         | 420 |
| Okapi   | 361 | .....                                                         | 420 |
|         |     |                                                               |     |
| Cow     | 421 | IRVRPNRPLGLFTHYIDNPTKTASTLRGNFYITGDRGYMDEDEGYFWFVSRADDIILSSGY | 480 |
| Giraffe | 421 | .....S.....                                                   | 480 |
| Okapi   | 421 | .....                                                         | 480 |
|         |     |                                                               |     |
| Cow     | 481 | RIGPFVESALIEHPAVAESAUVSSPDPPIRGEVVKAFIVLNPDKSHDQEQLKKEIQEHV   | 540 |
| Giraffe | 481 | .....K.....                                                   | 540 |
| Okapi   | 481 | .....                                                         | 540 |
|         |     |                                                               |     |
| Cow     | 541 | KRNTAPYKYPRKVEFIQELPKTISGKIKRNELRKKEWETI                      | 580 |
| Giraffe | 541 | ..S.....V.....                                                | 580 |
| Okapi   | 541 | ..S.....V.....                                                | 580 |

**Newick Tree of Mammalian ACSM3**

(pig:0.036346, ((camel:0.00563085, alpaca:0.0082587):0.0362893, ((bushbaby:0.0498459, human:0.0236649, baboon:0.0276509):0.0436566):0.00444697, (elephant:0.0397854, manatee:0.0467067):0.0287065):0.00736451, (horse:0.0266564, rhino:0.0337895):0.0125289, ((polecat:0.0297458, (panda:0.0139341, walrus:0.0211644):0.000399972):0.00719307, dog:0.022576):0.00317441, (tiger:0.00182893, cat:0.00509157):0.0333636):0.0158113):0.00277917):0.00272705):0.00507594, (((tibetan\_antelope:0.00509388, (goat:0.00164453, sheep:0.0104982):0.000114797):0.000176325, (gerenuk:0.00616657, (cow:0, yak:0.00174123):0.00252245, water\_buffalo:0.00614327):0.00427353):0.0006959):0.00518214, (giraffe:0.0114731, okapi:0.000648542):0.0135766):0.02136):0.036346);

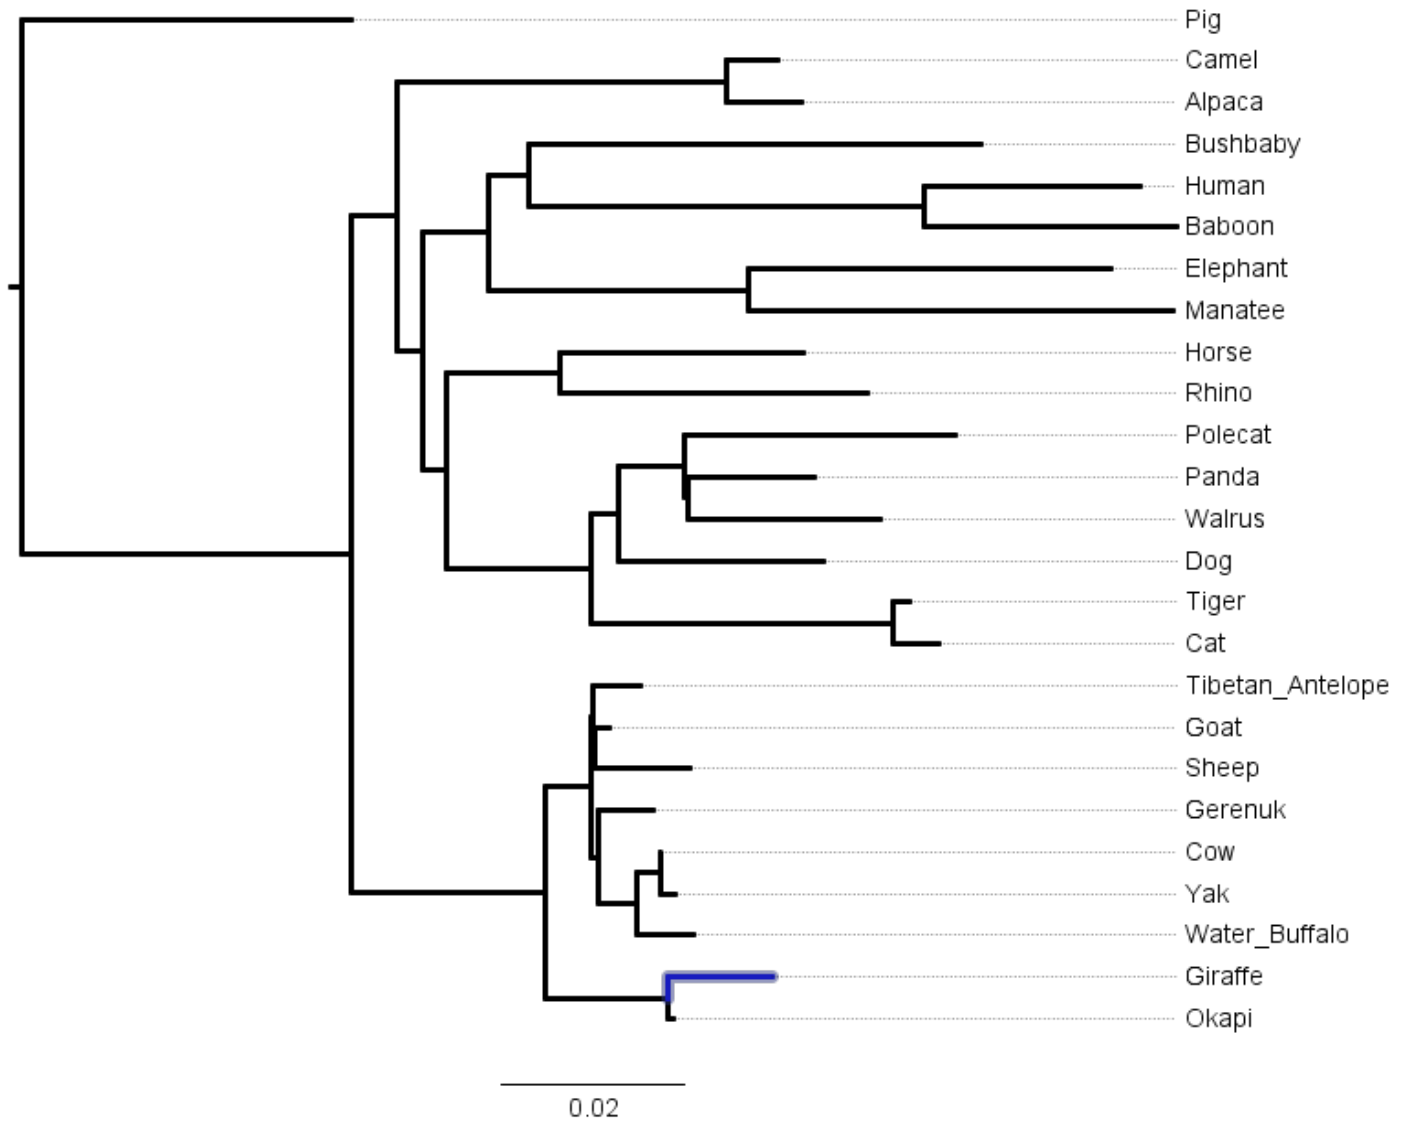

**Locus Name: Acyl-CoA Synthetase Medium-Chain Family Member 3 (ACSM3)**



**Locus Name:** Acyl-CoA Dehydrogenase (**ACADS**)

ENSBTAT0000009844 ACADS-201 acyl-CoA dehydrogenase short chain mitochondrial  
mouse: viable but exhibit organic aciduria and develop hypoglycemia and fatty livers after  
fasting

Giraffe: A9T UIS, H206R UPS  
Giraffe/Okapi: E76K UPS, I186V UIS, S236T UIS, A318V UIS

**Protein sequence Alignment of Cow, Giraffe and Okapi ACADS**

|         |     |                                                                |     |
|---------|-----|----------------------------------------------------------------|-----|
| Cow     | 1   | MAATLLARACGLVRGAPCPWGWRRRLHTVYQSVELPETHQMLRQTCRDFAEKELFPPIAAQV | 60  |
| Giraffe | 1   | .....T.....W.....                                              | 60  |
| Okapi   | 1   | .....W.....L                                                   | 60  |
|         |     |                                                                |     |
| Cow     | 61  | DKEHRFPAAQVKMGELGLMAMNVPEELSGAGLDYLAISIAMEEISRGCASTGVIMSVNN    | 120 |
| Giraffe | 61  | .....K.....D.....                                              | 120 |
| Okapi   | 61  | .....K.....D.....                                              | 120 |
|         |     |                                                                |     |
| Cow     | 121 | SLYLGPIILKFGTKEQKQRWVAPFTSGDKIGCFALSEPGNGSDAGAAATTARADGDSWVLS  | 180 |
| Giraffe | 121 | .....T.....                                                    | 180 |
| Okapi   | 121 | .....T.....                                                    | 180 |
|         |     |                                                                |     |
| Cow     | 181 | GTKAWITNAWEASAVVFASTDRSLHNKGISAFVPMPTPGLTLGKKEDKLGIRASSTAN     | 240 |
| Giraffe | 181 | .....V..S.....A.....R.....T....                                | 240 |
| Okapi   | 181 | .....V.....A.....M.....T....                                   | 240 |
|         |     |                                                                |     |
| Cow     | 241 | LIFEDCRIPKDSLLGEPGLGFKIAMQTLDTGRIGIASQALGIAQAALDCAVTYAENRSAF   | 300 |
| Giraffe | 241 | ...E.....S..M.....S.....                                       | 300 |
| Okapi   | 241 | ...E.....S..M.....S.....N..                                    | 300 |
|         |     |                                                                |     |
| Cow     | 301 | GAPLTKLQAIQFKLADMALALESARLLTWRAAMLKDNKKPFTKEAAMAKLAASEAATAIT   | 360 |
| Giraffe | 301 | .....G.....V.....                                              | 360 |
| Okapi   | 301 | .....G.....V.....                                              | 360 |
|         |     |                                                                |     |
| Cow     | 361 | HQAMQILGGMGYVKEMPAERHYRDARITEIYEGTSEIQRLVVAGHLLKSYRS           | 412 |
| Giraffe | 361 | .....T.....                                                    | 412 |
| Okapi   | 361 | .....T.....                                                    | 412 |

**Newick Tree of Mammalian ACADS**

(manatee:0.0297308, ((polecat:0.0164476, walrus:0.0307837):0.010229, (((orangutan:0.0018263, rhesus\_monkey:0.00275351, baboon:0.0021127):0.00304885):0.00122994, human:0.00364823):0.0344429, bushbaby:0.0327112):0.00463058, (rhino:0.0253092, (rabbit:0.0427137, horse:0.0337335):0.00463544):0.00614534):0.00193616):0.00378163, (pig:0.0484722, ((dolphin:0.00406857, baiji\_dolphin:0.0155412):0.00110867, sperm\_whale:0.0111876):0.0233502, ((water\_buffalo:0.00862668, cow:0.0159471):0.00567232, (giraffe:0.00683494, okapi:0.00779998):0.0156148):0.0330674):0.00320999):0.00473364):0.0297308);

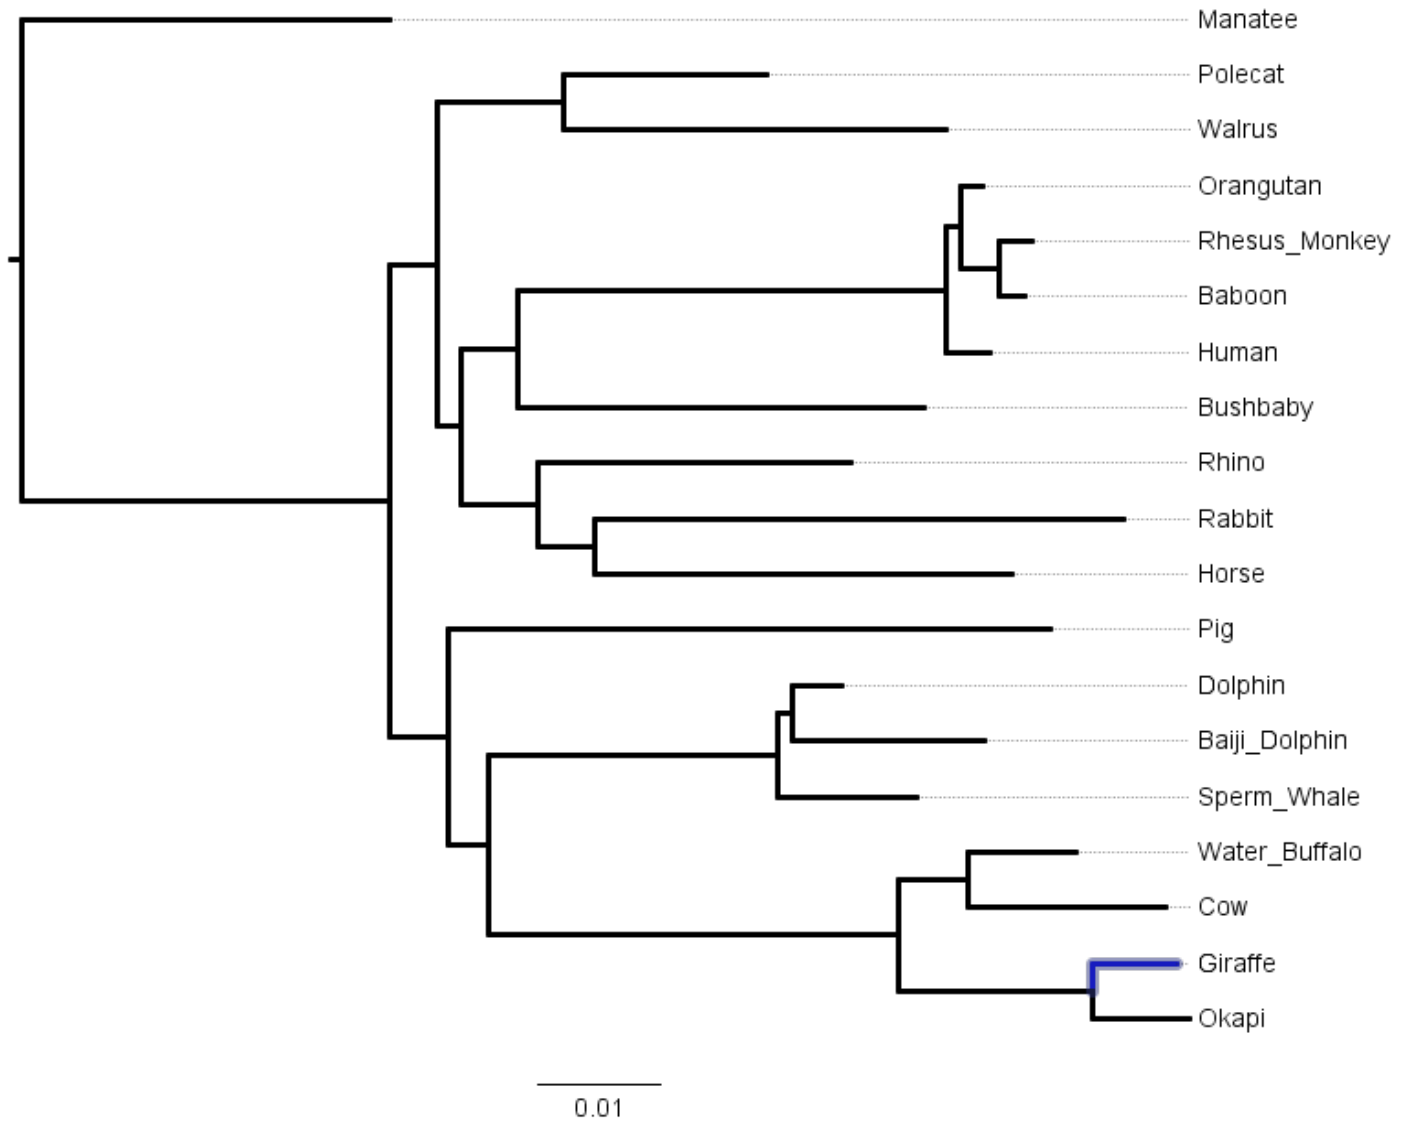

**Locus Name:** Acyl-CoA Dehydrogenase (**ACADS**)

**Locus Name:** NADH dehydrogenase [ubiquinone] 1 beta subcomplex subunit 8 (**NDUFB8**)

ENSBTAT00000000100 NDUFB8-201 NADH dehydrogenase- ubiquinone subunit mitochondria electron transport  
no mutation in m/h described; putative QTL for nutrient transformation in cattle

PP2: Giraffe, K34E; Giraffe/Okapi, L24M

Giraffe: K34E UIS, Y72F UIS, L128F UPS

**Protein sequence Alignment of Cow, Giraffe and Okapi NDUFB8**

|         |     |                                                              |     |
|---------|-----|--------------------------------------------------------------|-----|
| Cow     | 1   | MAAARAGVLGVRWLQKAARNVVPLGARTASHITKDMLPGYPKTPPEERAAAANKYNMRVE | 60  |
| Giraffe | 1   | .....M.....E.....                                            | 60  |
| Okapi   | 1   | .....M.....F.....                                            | 60  |
|         |     |                                                              |     |
| Cow     | 61  | DYEPYPDDGTGYGDYPKLPDRSQQERDPWYDWDHPDLRLNWGEPMHWDLDMYIRNRVDT  | 120 |
| Giraffe | 61  | .....M.F.....                                                | 120 |
| Okapi   | 61  | .....M.....                                                  | 120 |
|         |     |                                                              |     |
| Cow     | 121 | PTPVNWNLMCKHLFGFVAFMLFMFWVGETYPAYQPVGPKQYPYNNLYLERGGDPNKEPEP | 180 |
| Giraffe | 121 | .....F.....I.....T.....                                      | 180 |
| Okapi   | 121 | .....I.....T.....                                            | 180 |
|         |     |                                                              |     |
| Cow     | 181 | VVHYEI                                                       | 186 |
| Giraffe | 181 | .....                                                        | 186 |
| Okapi   | 181 | .....                                                        | 186 |

**Newick Tree of Mammalian NDUFB8**

(rat:0.0466707, ((rhesus\_monkey:0.031416, (human:0.0161791, orangutan:0.0334381):0.0309388):0.0499067, (bushbaby:0.038833, ((alpaca:0.00311812, camel:0.00769301):0.0373299, ((manatee:0.0117701, elephant:0.0435207):0.0227242, pig:0.0488404):0.00452384, ((horse:0.0094675, rhino:0.0289028):0.0025596, (tiger:0.0101734, (panda:0.0118206, walrus:0.0209751):0.00499692, dog:0.0310593):0.00621582):0.013458):0.000986827, ((minke\_whale:0.000394348, baiji\_dolphin:0.00572374, orca:0.0105375):0.00501122):0.00093587, sperm\_whale:0.0154388):0.00886842, ((tibetan\_antelope:0, sheep:0.0109117):0.00602838, (cow:0.00580861, water\_buffalo:0.0104526):0.00494835):0.00257955, (giraffe:0.0163783, okapi:0.00536341):0.00850647):0.00998073):0.007611):0.00488463):0.00821824):0.0108945):0.00873181):0.0466707);

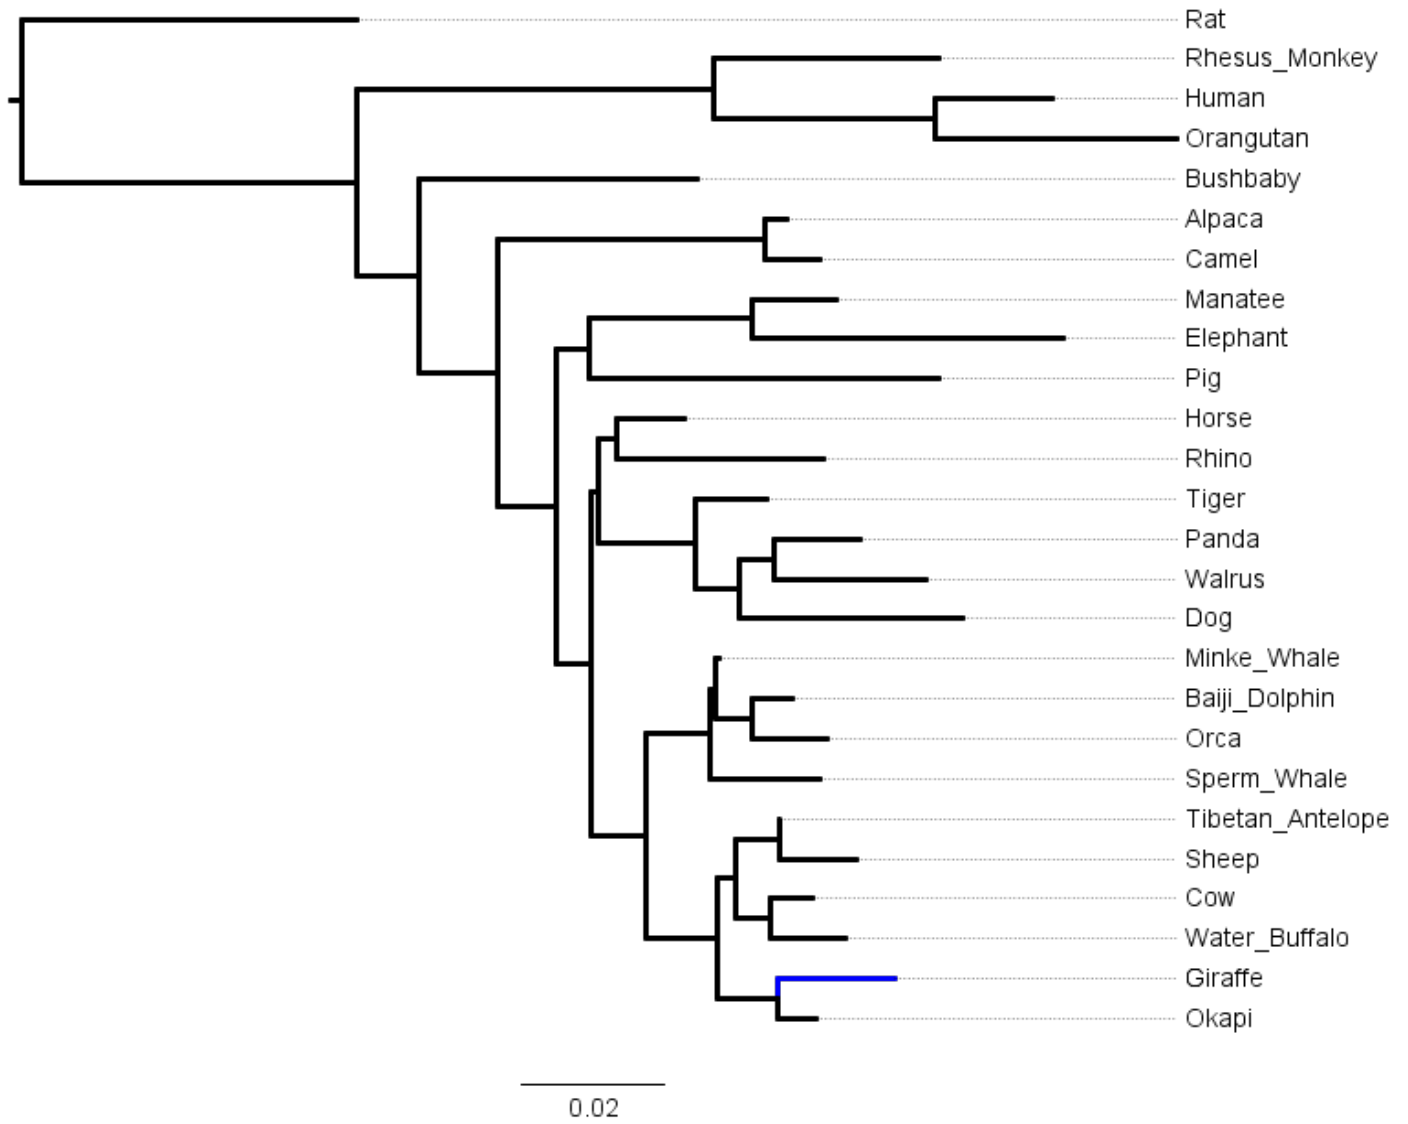

**Locus Name:** NADH dehydrogenase [ubiquinone] 1 beta subcomplex subunit 8 (**NDUFB8**)

Locus Name: Succinate dehydrogenase (SDHB)

ENSBTAT00000010949 SDHB-201 succinate dehydrogenase ubiquinone complex II mitochondria  
electron transport and citric acid cycle  
human: familial paraganglioma

Note MA1 and NZoo are identical except for C/R in lin1.

PP2: (Giraffe/Okapi) G20W

Giraffe: R12P UPS, P14S UPS, K55R UIS, A285S UIS, R11C UPS (MA1 only)

Giraffe/Okapi: G19S UPS, G20W UPS, G165R UPS

Okapi: A34V UPS

**Protein sequence Alignment of Cow, Giraffe and Okapi SDHB**

|         |     |                                                              |     |
|---------|-----|--------------------------------------------------------------|-----|
| Cow     | 1   | MAAVVALSLRRRFPAALGGARLQACRGAQTAAAAAPRIKKFAIYRWDPDKTGDKPHMQT  | 60  |
| Giraffe | 1   | .....P.S....SW.....V.....R.....                              | 60  |
| Okapi   | 1   | .....SW.....V.....                                           | 60  |
|         |     |                                                              |     |
| Cow     | 61  | YEIDLNNCGPMVLDALIKIKNEIDSTLTFRRSCREGICGSCAMNINGGNTLACTRRIDTN | 120 |
| Giraffe | 61  | .....                                                        | 120 |
| Okapi   | 61  | .....                                                        | 120 |
|         |     |                                                              |     |
| Cow     | 121 | LSKVSKIYPLPHMYVIKDLVPLSNFYAQYKSIIEPYLKKKDESQGGKEQYLQSIEDREKL | 180 |
| Giraffe | 121 | .N.....R.....                                                | 180 |
| Okapi   | 121 | .N.....R.....                                                | 180 |
|         |     |                                                              |     |
| Cow     | 181 | DGLYECILCACSTSCPSYWWNGDKYLGPAVLMQAYRWMIDSRDDFTEERLAKLQDPFSL  | 240 |
| Giraffe | 181 | .....                                                        | 240 |
| Okapi   | 181 | .....                                                        | 240 |
|         |     |                                                              |     |
| Cow     | 241 | YRCHTIMNCTQTCPKGLNPGKAIKMMATYKEKQASA                         | 280 |
| Giraffe | 241 | .....RRS..                                                   | 280 |
| Okapi   | 241 | .....R....                                                   | 280 |

**Newick Tree of Mammalian**

```
(rat:0.0281864, ((elephant:0.0140475, (manatee:0.0207438,
aardvark:0.0381307):0.00414034):0.00275122, (((human:0.00262191,
orangutan:0.00454664):0.00469757, (rhesus_monkey:0.00524109,
baboon:0.00553121):0.00253636):0.0155736, bushbaby:0.0257615):0.00514465,
(((flying_fox_bat:0.0158236, horse:0.00949688):0.00310431, ((wlarus:0.0135686,
(polar_bear:0.00728323, panda:0.0109332):0.00461818):0.00298046, (dog:0.000146072,
polecat:0.00343176):0.00241848):0.00533172, cat:0.0114968):0.00740558):0.00249688,
(((minke_whale:0.00389848, ((sperm_whale:0.000771997, baiji_dolphin:0.0245485):6.3855e-05,
(orca:0.00312325, dolphin:0.0040453):0.00269294):0.00647283):0.00807418, (camel:0.00104348,
alpaca:0.00612507):0.00790473):0.00294939, pig:0.0143171):0.00421863, (rhino:0.0219161,
(water_buffalo:0, (giraffe:0.0199947, okapi:0.00523451):0.0135203, (cow:0,
gerenuk:0.00363408):0.00468624):0.00605696):0.0139869):0.00320491):0.00110757):0.00343791):0.0041
4917):0.0281864);
```

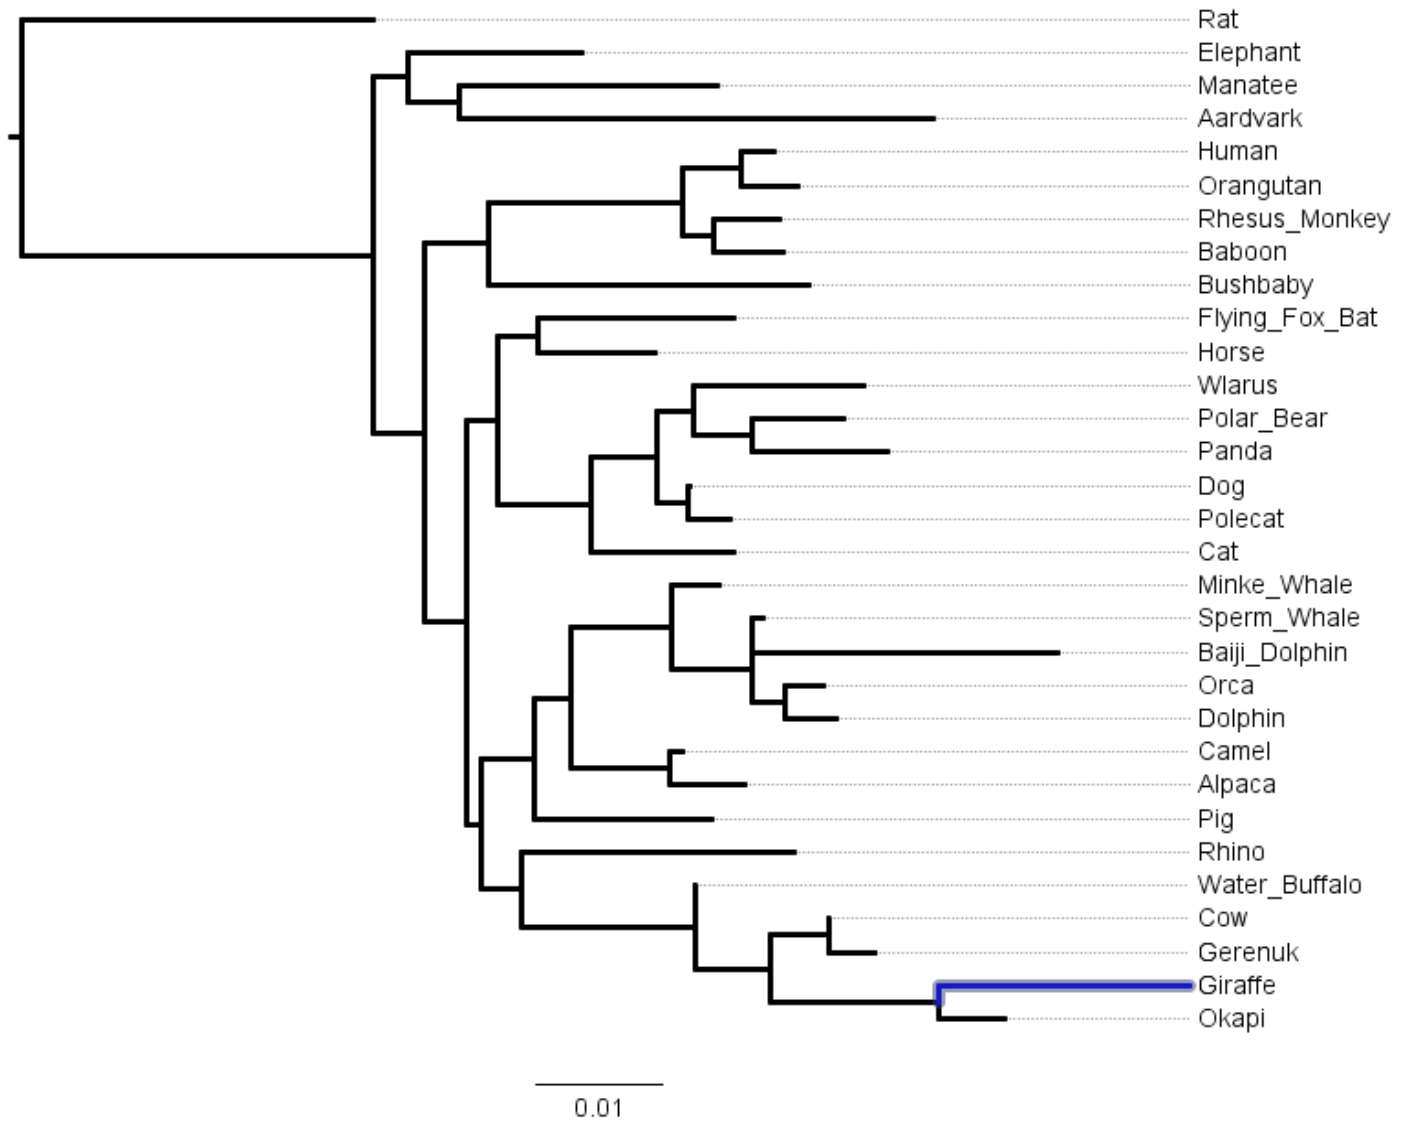

Locus Name: Succinate dehydrogenase (**SDHB**)

**Locus Name: Proline Rich 19 (PRR19)**

ENSBTAT00000017664 PRR19-201 proline rich protein 19 secreted tannin binding protein  
no mutation in m/h described

PSG: (Giraffe) S335H  
PP2: (Giraffe) P271T, L340R

Giraffe: P270AV UPS, P271 UIS, G281R UPS, I310T UPS, S335H UPS, L340R UPS  
Giraffe/Okapi: S49G UPS, P264S UPS

**Protein sequence Alignment of Cow, Giraffe and Okapi PRR19**

|         |     |                                                               |     |
|---------|-----|---------------------------------------------------------------|-----|
| Cow     | 1   | MDPGEPAKPFQOPEKPGRVRRRKRTRERNEALAGSRQPLTYQHPPVASRDPHMVLRNSV   | 60  |
| Giraffe | 1   | .....V...R..AC....M.G.....                                    | 60  |
| Okapi   | 1   | .....V...RR.A....M.G.....                                     | 60  |
|         |     |                                                               |     |
| Cow     | 61  | APTAAKLVVITQGRLSRDHRGLFNHEVKSLDVARLLSSESLELGTALTTKSSPSPGRGQ   | 120 |
| Giraffe | 61  | .....G...SA.....                                              | 120 |
| Okapi   | 61  | .....G...S.....                                               | 120 |
|         |     |                                                               |     |
| Cow     | 121 | QPSLQSRGKENQVPGGSGPGPPSPQLPDLEQLLQQLILPRAFPRRNLVQEARDAI       | 180 |
| Giraffe | 121 | .....Q.....                                                   | 180 |
| Okapi   | 121 | .....Q.....                                                   | 180 |
|         |     |                                                               |     |
| Cow     | 181 | VGTLQACHGCVPDLTLLVLRGCQPHLPGTDPGALKRQRMTFSPWINSPEQAPGEGRRRRQG | 240 |
| Giraffe | 181 | .....E...P.....                                               | 240 |
| Okapi   | 181 | .....E...P.....                                               | 240 |
|         |     |                                                               |     |
| Cow     | 241 | TKELTFAVPTTSSTPTVHQVSLAPPKGPWPPPLSSLPSPSGAAWGPPTAFDLLKSIWLVA  | 300 |
| Giraffe | 241 | .....R...S....AT.....RV.....                                  | 300 |
| Okapi   | 241 | .....R...S.....V.....                                         | 300 |
|         |     |                                                               |     |
| Cow     | 301 | TPPPRPWGIGPPQLLPSPPLLRSSALDWSPSPAPLPSLSWMAQSSPEAWSFPPM        | 360 |
| Giraffe | 301 | .....T.....H....R....V.....                                   | 360 |
| Okapi   | 301 | .....V.....                                                   | 360 |
|         |     |                                                               |     |
| Cow     | 361 | RLY                                                           | 363 |
| Giraffe | 361 | ...                                                           | 363 |
| Okapi   | 361 | ...                                                           | 363 |

**Newick Tree of Mammalian PRR19**

((rat:0.0386238, mouse:0.053525):0.0883841, ((baboon:0.00603163, macaque:0.00811335):0.0116231, human:0.0185133):0.110478, (((aardvark:0.0830881, elephant:0.0772208):0.0441121, lemur:0.115863):0.0041864, (((big\_brown\_bat:0.023928, Brandt\_s\_bat:0.01027):0.00653338, mouse\_nose\_bat:0.0193772):0.0832193, (large\_flying\_fox:0.00124157, black\_flying\_fox:0.00712677):0.0880732):0.0222939, (horse:0.0732935, rhino:0.0394889):0.0272606):0.00110741, (((Weddell\_seal:0.0118746, walrus:0.0223234):0.00971802, (polar\_bear:0.00807014, panda:0.0174659):0.0136758):0.00647727, (dog:0.0500977, ferret:0.0658449):0.00186069):0.010002, (tiger:0.00518627, cat:0.00608169):0.0313018):0.026254, ((camel:0.0110255, alpaca:0.0169129):0.0632447, (pig:0.10878, (((orca:0.0174325, baiji\_dolphin:0.0219085):0.0147489, sperm\_whale:0.0193722):0.00833998, minke\_whale:0.0237239):0.037262, (((cow:0.00799261, water\_buffalo:0.00867521):0.00915383, (musimon\_sheep:0, sheep:0.000698761):0.0103752, tibetan\_antelope:0.00989567):0.00886299):0.0016283, gerenuk:0.0191309):0.00752895, (giraffe:0.0207924, okapi:0.00431613):0.012737):0.0580005):0.00389828):0.00683237):0.0129994):0.00393652):0.012024):0.00872935):0.0883841);

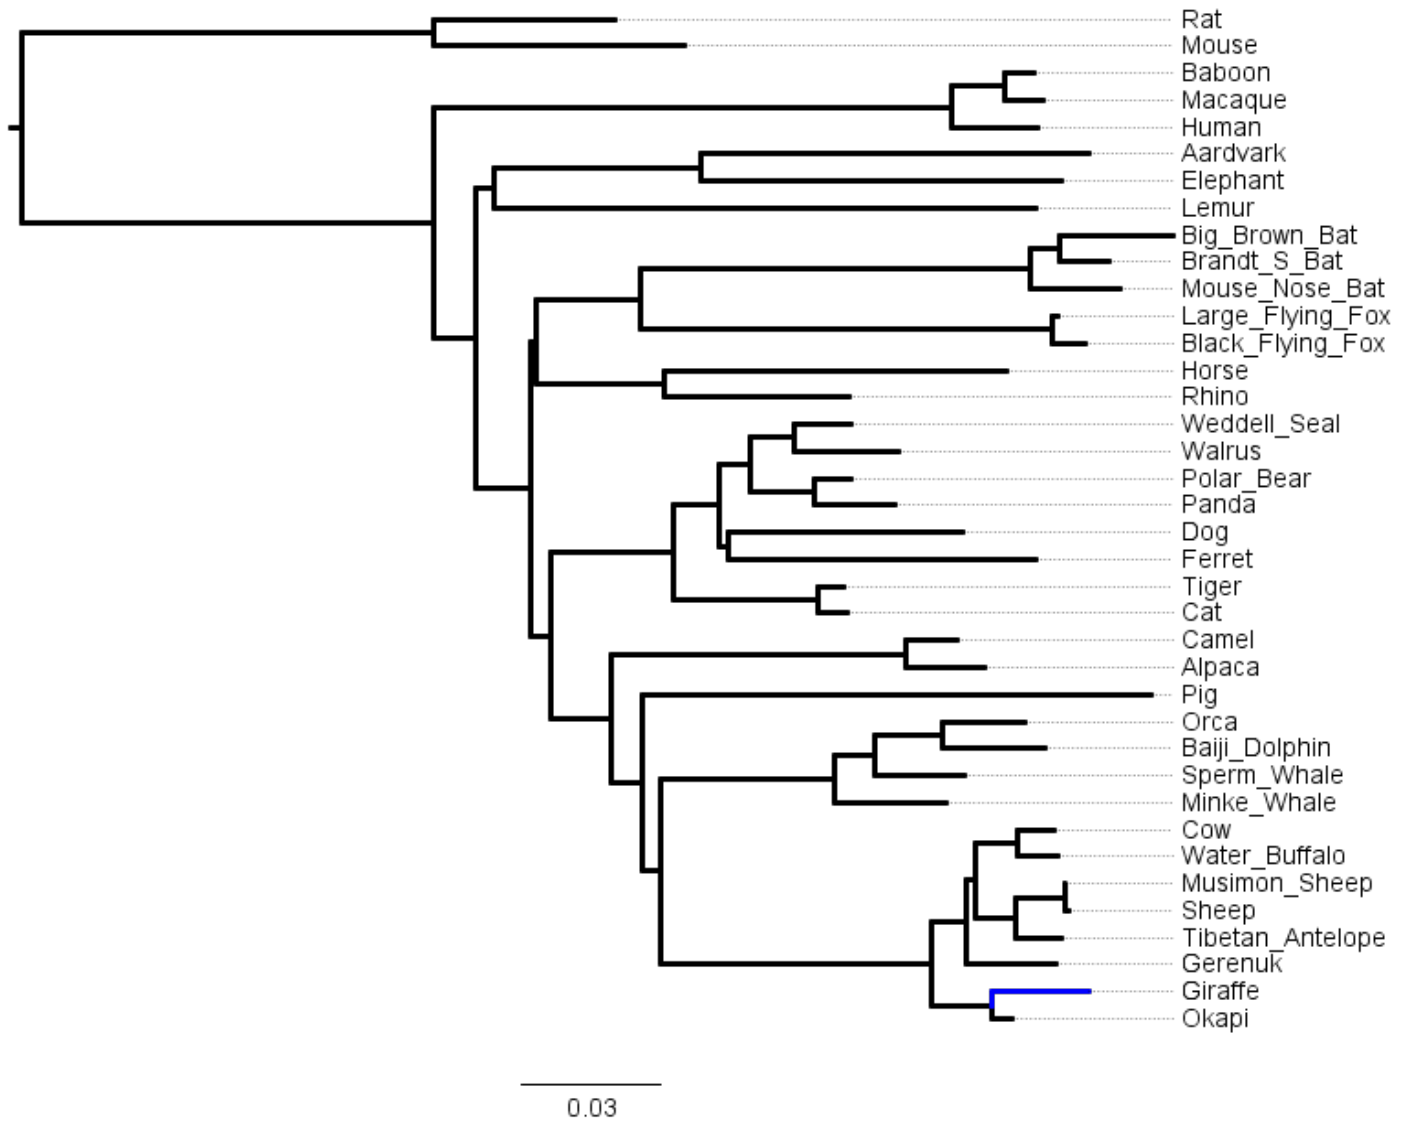

Locus Name: Proline Rich 19 (PRR19)



**Locus Name:** RIBOSOMAL L10 PROTEIN MITOCHONDRIAL (MRP10)

ENSBTAT0000002395 MRPL10-201 ribosomal L10 protein mitochondrial protein synthesis  
no mutation in m/h described; presumed essential gene

PSG: (Giraffe) V5T|GTG/ACG

Giraffe: V5T UPS, Q204L UIS

Giraffe/Okapi: V59L UPS

**Protein sequence Alignment of Cow, Giraffe and Okapi MRP10**

|         |     |                                                              |     |
|---------|-----|--------------------------------------------------------------|-----|
| Cow     | 1   | MAAAVAGMLRGGLLPQAGRLPTHQFIRYGSKAVTRHRRVMHFERQKLMVTEYIAPKPVV  | 60  |
| Giraffe | 1   | ....T.....I.....L.                                           | 60  |
| Okapi   | 1   | .....I.....L.                                                | 60  |
|         |     |                                                              |     |
| Cow     | 61  | NPRCLPPPPSPPQEETGLIRLLRREIAAVFRDNRMIAVCQNVAMSAEDKLLMRHQLRKHK | 120 |
| Giraffe | 61  | .....R.....                                                  | 120 |
| Okapi   | 61  | .....                                                        | 120 |
|         |     |                                                              |     |
| Cow     | 121 | ILMKVFPNQILKPFLEDSKYQNLPLFVGHNLLVSEEPVKEMVRIKSVPFLLGGC       | 180 |
| Giraffe | 121 | .....M.....                                                  | 180 |
| Okapi   | 121 | .....M.....                                                  | 180 |
|         |     |                                                              |     |
| Cow     | 181 | IDDTILSRQGFINYSKLPALALAQGELVGGTLTLLTARTHSLQHHPLQLTALLDQYARQQ | 240 |
| Giraffe | 181 | .....L.....A.....                                            | 240 |
| Okapi   | 181 | .....A.....                                                  | 240 |
|         |     |                                                              |     |
| Cow     | 241 | HEGDPVVPASAQPDPPNPVQD                                        | 261 |
| Giraffe | 241 | .....V.....                                                  | 261 |
| Okapi   | 241 | .....                                                        | 261 |

**Newick Tree of Mammalian MRP10**

(rat:0.0645262, (star\_nose\_mole:0.099884, ((dog:0.0272981, ((walrus:0.0275417, Weddell\_seal:0.0280568):0.0135599, (panda:0.0165345, polar\_bear:0.0109756):0.0171246):0.00912627, ferret:0.0641004):0.00334294):0.0391503, ((manatee:0.0418545, elephant:0.0505261):0.0290281, aardvark:0.0581608):0.00625984):0.00470102, (((((gibbon:0.0188812, orangutan:0.00446826):0.00117767, human:0.0109935):0.00751557, baboon:0.0303341):0.0412679, armadillo:0.0610013):0.00650589, (gray\_mouse\_lemur:0.0827197, ((large\_flying\_fox:0.0548505, (Brandt\_s\_bat:0.00579485, mouse\_eared\_bat:0.0174641):0.089278):0.0122031, (hedgehog:0.0953026, (camel:0.0578301, (horse:0.045932, rhino:0.0464486):0.0173674, ((baiji\_dolphin:0.0253808, (orca:0, bottle\_nose\_dolphin:0.00399924):0.0217992):0.0284092, ((giraffe:0.0127051, okapi:0.00262143):0.00996322, ((gerenuk:0.0150397, ((sheep:0, musimon\_sheep:0.00389757):0.0106477, tibetan\_antelope:0.0126571):0.00366015, goat:0.0119038):0.00548156):0.00141166, (cow:0.00223277, (yak:0, bison:0.00385035):0.00161344):0.0055427):0.00084148):0.0401315):0.0115353):0.00501919):0.00175823):0.00166):0.00394547):0.00450686):0.000830059):0.0133847):0.0645262);

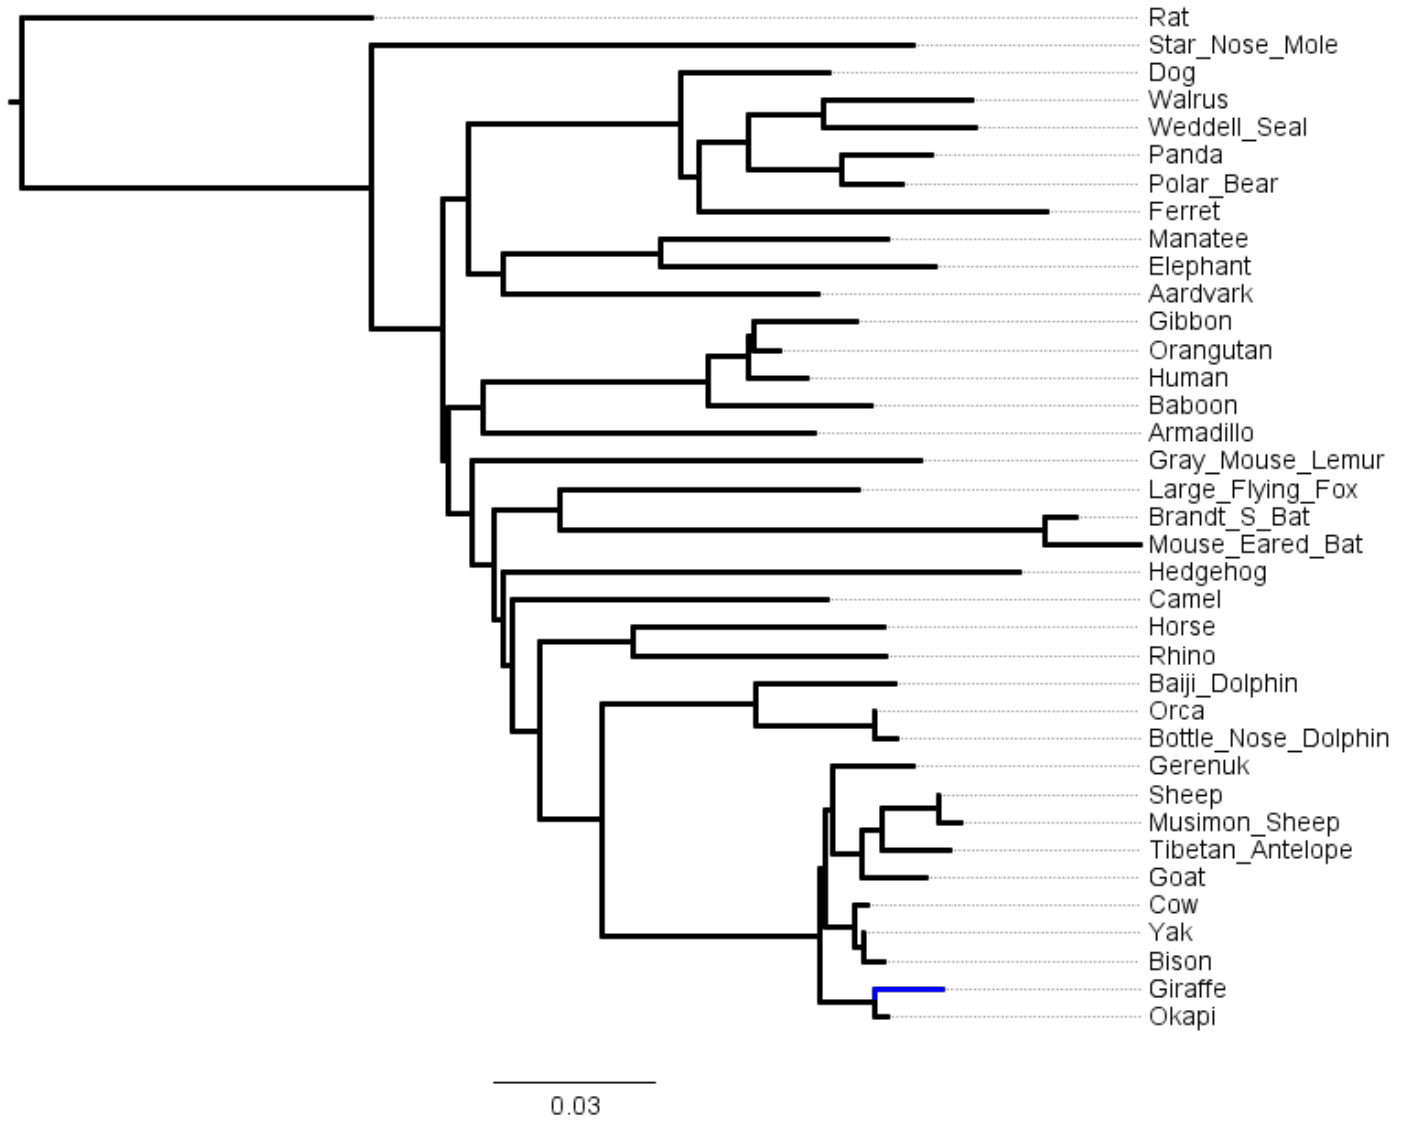

**Locus Name:** RIBOSOMAL L10 PROTEIN MITOCHONDRIAL (**MRP10**)

**Locus Name:** Mediator Of DNA-Damage Checkpoint 1 (MDC1)

ENSBTAT0000035900 MDC1-201 mediator DNA damage checkpoint dsDNA break repair, scaffold mouse: growth retardation and display increased susceptibility to ionizing radiation, male infertility, T and B cell abnormalities, and increased genomic instability

PP2: (Giraffe)L175F, S189L, G209R, S235G, V253M, E334K, L369Q, I400M, Q738P, A751S, E873Q, G960S, P969L, P1034S, S1057I, S1095F, R1114P, T1116S, P1136H, T1183R, T1269P, V1449M, T1474P, P1505L, A1785I, E1792D, P1827F, & A1911T. Giraffe and okapi share 15 PRD.

**Protein sequence Alignment of Water Buffalo, Giraffe and Okapi MDC1**

|              |     |                                                                |     |
|--------------|-----|----------------------------------------------------------------|-----|
| waterbuffalo | 1   | MEDTQILNWEVEEEEEVEERPSESLGYSLEPLGQLRIFSSSYGPEKDFPLYLGKMNIGRM   | 60  |
| Giraffe      | 1   | .....V.....V...S.....HV.....                                   | 60  |
| Okapi        | 1   | .....V.....V...S.....K.....H.....                              | 60  |
| Waterbuffalo | 61  | PDCSVALPFSSISKQHAVIEISAWDKAPVLRDCGSLNGTQILRPPKVLGPGVSHRLRDRE   | 120 |
| Giraffe      | 61  | .....V.....Q.....Q.....                                        | 120 |
| Okapi        | 61  | .....V.....Q.....Q.....                                        | 120 |
| Waterbuffalo | 121 | LILFADLPCQYHRLDVPFVSRGPLTVEETPRVQGGTQPRLLLAEDSEEEVDSFLDKC      | 180 |
| Giraffe      | 121 | .....                                                          | 181 |
|              |     | \                                                              |     |
|              |     |                                                                |     |
|              |     | R                                                              |     |
| Okapi        | 121 | .....Q.....                                                    | 180 |
| Waterbuffalo | 181 | VVKGPRTSSLATVVPESDEEGPSPAPDGPSPAFNLSNTDDEESQESGAGEASSAPRR      | 240 |
| Giraffe      | 182 | .....R.....A-----                                              | 235 |
| Okapi        | 181 | .A.....A-----                                                  | 234 |
| Waterbuffalo | 241 | GSAAEETEQPEPVTAIEIQIEKDQCSVKEKNRDEIERDVRNGVVPTGVILERSQPSGEDSD  | 300 |
| Giraffe      | 236 | .T.....K..M.....A.....K.....                                   | 295 |
| Okapi        | 235 | .TT.....R.....K.....I.....K...S.....                           | 294 |
| Waterbuffalo | 301 | TDVSDSESGPPRRLAGVVRPKRAWSCNFIDSNTDGEDEGIPATPAVVPKMERQIFHEAGTQS | 360 |
| Giraffe      | 296 | .....P.....G...N.K.....V.....                                  | 355 |
| Okapi        | 295 | .....P.....G...N.K.....V.....                                  | 354 |
| Waterbuffalo | 361 | PQAPGVARQQESPADGDTDIEEGEVPDRSQASMVIDSNTDDEEEVSAALTLARLRESQA    | 420 |
| Giraffe      | 356 | .....A.....V.M.....A.....H...H.                                | 412 |
| Okapi        | 355 | .....R.....A.....V.....A.....H...H.                            | 411 |
| Waterbuffalo | 421 | GKWTRDPDAEEDRAQPVALLEQSASAGGSDTDVEEEGLPVERRGMVPGHMDREYSKK      | 480 |
| Giraffe      |     | -----                                                          |     |
| Okapi        |     | -----                                                          |     |
| Waterbuffalo | 481 | SQHPPRSDTEGKEDKSSPGVHLERSQASAQVEDEVPLGPAVALPEKRQVQGIVWTHHTD    | 540 |
| Giraffe      |     | -----                                                          |     |
| Okapi        |     | -----                                                          |     |
| Waterbuffalo | 541 | AEAEGGPAPLPLVLRLEEAWPPLAGDCKLDAENTSSAAAGVRKSQLPAEKDAGTTWDAAVP  | 600 |
| Giraffe      |     | -----                                                          |     |
| Okapi        |     | -----                                                          |     |
| Waterbuffalo | 601 | EQDRALATGTQGGSSMAPGEQDLLPVSRENLADLVVDGTGTPGEPQPQREGAQTTRERE    | 660 |
| Giraffe      |     | -----                                                          |     |
| Okapi        |     | -----                                                          |     |
| Waterbuffalo | 661 | PHGNRATDSGESLHDSLDLDPATQCFADRKNQSLEAAPSMEDEPTQAFLLPQEPGPS      | 720 |
| Giraffe      | 410 | -----F.....V..E.....V..V.....LP.....                           | 458 |
| Okapi        | 396 | -----VA.E.....V.....LP.....                                    | 457 |
| Waterbuffalo | 721 | CCSSQATGSLNEAWEVLATQPFPCPREYEASETQTAVTLLDTRASCPPPSRTAQEQHPES   | 780 |
| Giraffe      | 459 | ...FP....D.....S.....S.....R...C.....                          | 518 |
| Okapi        | 458 | ...FP....D.....S.....C.....                                    | 517 |
| Waterbuffalo | 781 | PVRAEALGMEGRGMQTVKDKGTQRETTERRVIPEGPPQNETKKLPSEGEREDVTGEEEL    | 840 |
| Giraffe      | 519 | ..H..P.....M..P..A.....L.K.....                                | 578 |
| Okapi        | 518 | ..H..P.....M..P..A.....L.K.....                                | 577 |

|              |      |                                                                |      |
|--------------|------|----------------------------------------------------------------|------|
| Waterbuffalo | 841  | IRGIQGREQNQVLARDTQSQESDKKVKASASTGRGMEIVKLETETPKETQEKEREKQTLAG  | 900  |
| Giraffe      | 579  | .....D.....G.....Q.....M.....V.I.....                          | 638  |
| Okapi        | 578  | .....D.....V.....Q.....M.....I.....V.....                      | 637  |
| Waterbuffalo | 901  | EIFESEAGKLVVERESEVGGLEVKGPQELLDGRGPQMRTEAGGQDQKQASGPPSEPGAG    | 960  |
| Giraffe      | 639  | .....A..N.A.....V.....L.X.....S.....P.L...                     | 698  |
| Okapi        | 638  | .....A..N.A.....I.....G.....P.....                             | 697  |
| Waterbuffalo | 961  | AGDLQGFSTDPVASGSQAGGGRGAPGSPRRQQRGDLNCEMPPAEKASRGDQESPDACLPP   | 1020 |
| Giraffe      | 699  | .....LA.....R.....K.....G...S.....                             | 758  |
| Okapi        | 698  | .....LA.....R.....G...S.....                                   | 757  |
| Waterbuffalo | 1021 | AAPEASAALPNLSIQIKHPAPQSLLFPSPAPLELPIPRTRENEQEAPETPFSSSELNS     | 1080 |
| Giraffe      | 759  | .....T.....Q..S.....F.....                                     | 818  |
| Okapi        | 758  | .....P.....T.....Q..S.....L.F.....                             | 817  |
| Waterbuffalo | 1081 | VHPEPKVVRPQGSPPVSSLPLEPHPTTPTGQPIALEPTSGVRSRSGTHSSFDVTASSVVPTA | 1140 |
| Giraffe      | 819  | ...K.....I.....H..P.....R.....FI....                           | 878  |
| Okapi        | 818  | ...N.....I.....Y.....P.....R.....                              | 877  |
| Waterbuffalo | 1141 | LALQPSTSTDQPVAPKPTLRAPRGRAQRSSVKTPEPNVRTDQPIAPELTAKATRGRAQRS   | 1200 |
| Giraffe      | 879  | .....IT..R.....H.....S.S...V.....                              | 938  |
| Okapi        | 878  | .....II.....H.....S.P...V.....                                 | 937  |
| Waterbuffalo | 1201 | SVKTPKPDNPTIPKQPSTSTDQPVTPKPTSRAPRGRTPKSSAKTPEPAVPTASELQPAA    | 1260 |
| Giraffe      | 939  | .....TL.....L.....R..V.....V.....                              | 998  |
| Okapi        | 938  | .....T.....L.....R..V.....V.....                               | 997  |
| Waterbuffalo | 1261 | PKDQPVAPELTSRATRGRTRQRSSIKTSKPDSTAPEPQPSTSTDQPVTPKPTSRAPRGRTR  | 1320 |
| Giraffe      | 999  | .....V.....M..T.....                                           | 1059 |
|              |      | \                                                              |      |
|              |      |                                                                |      |
|              |      | P                                                              |      |
| Okapi        | 998  | LT.....V.....M..T....F.....                                    | 1058 |
|              |      | \                                                              |      |
|              |      |                                                                |      |
|              |      | P                                                              |      |
| Waterbuffalo | 1321 | PRSSSKTPEPVVSTASELQPSALTDQPVTPELTSRATRRAQRSSVKTDPDVTTPPELQ     | 1380 |
| Giraffe      | 1060 | ....I.....L.....G.....S.....                                   | 1119 |
| Okapi        | 1059 | ....T.....G.....                                               | 1118 |
| Waterbuffalo | 1381 | PSTSTDQLVTPKRPSRAPRGRTRRSSAKTPEPVVPTASELQPSAPADQVGPWATQCRRH    | 1440 |
| Giraffe      | 1120 | .....PT.....L.....S.....N.....R                                | 1179 |
| Okapi        | 1119 | .....PT.....L.....K.....R                                      | 1178 |
| Waterbuffalo | 1441 | RSSVKTLEPVVPTVPEPQPSTSKDQSVAPEPTSQATQSQTHRSSVKTSPTEPTAPDLKP    | 1500 |
| Giraffe      | 1180 | .....P....A.....G...K.....                                     | 1239 |
| Okapi        | 1179 | .....P.....G.....                                              | 1238 |
| Waterbuffalo | 1501 | SSPTDQPVTPKVIAQGGPSRTRASTASAVLVPTTPEFQCPVPSEQLSPDPIPEVNCSL     | 1560 |
| Giraffe      | 1240 | .....S.....P.....L.....R                                       | 1299 |
| Okapi        | 1239 | .....S.....S.....P.....R                                       | 1298 |
| Waterbuffalo | 1561 | RPRATRKHGSPTAHVHEPCTAPPEPNSRSSRNQTHGAMKAAKLLSTIPEPAFAQLPEAPP   | 1620 |
| Giraffe      | 1300 | .....YS.....RR..V..EP.....V..                                  | 1359 |
| Okapi        | 1299 | .....S.....G..RR..V..EP.....V..                                | 1358 |
| Waterbuffalo | 1621 | HTPQMPKEEAADGSGFTPEPQPRASQNRKRPSATAHSPPLQKRLQGRVPOKAASLKEEE    | 1680 |
| Giraffe      | 1360 | .I..I..D.....K...H..A.IT.....F...K.....TI....                  | 1420 |
|              |      | \                                                              |      |
|              |      |                                                                |      |
|              |      | E                                                              |      |
| Okapi        | 1359 | .I..I.....K...C..A.IT.....K....V.V....                         | 1419 |
|              |      | \                                                              |      |
|              |      |                                                                |      |
|              |      | E                                                              |      |
| Waterbuffalo | 1681 | NPAARPRKEEGVVIPGPGKRKREQTEESQGRPSRSLRRTKPVQESTAPKVLFTGVVDAR    | 1740 |
| Giraffe      | 1421 | ...G.....LI.....                                               | 1480 |
| Okapi        | 1420 | ...G.....I.....                                                | 1479 |

|              |      |                                                               |      |
|--------------|------|---------------------------------------------------------------|------|
| Waterbuffalo | 1741 | GERTVLALGGSLASSVAEASHLVTDRIIRRTVKFLCALGRGIPILSLAWLHESRKAGCFLP | 1800 |
| Giraffe      | 1481 | .....T.....                                                   | 1540 |
| Okapi        | 1480 | .....                                                         | 1539 |
| Waterbuffalo | 1801 | PDEYLVTDPEQEKNFGFSLREALSRARERRLLEGYEIHVTPGVQPPPPQMGEIINCCGGA  | 1860 |
| Giraffe      | 1541 | .....Q.....Y.....                                             | 1600 |
| Okapi        | 1540 | .....Q.....                                                   | 1599 |
| Waterbuffalo | 1861 | ILPSMPRSYKQORVVITCSQDFPRCAIPSRVGLPVLSPEFLLTGVLKQEVKPEAFSTV    | 1920 |
| Giraffe      | 1601 | .....Y.....I.....                                             | 1660 |
| Okapi        | 1600 | .....Y.....I.....                                             | 1659 |
| Waterbuffalo | 1921 | EMSST                                                         | 1925 |
| Giraffe      | 1661 | .....                                                         | 1665 |
| Okapi        | 1660 | .V...                                                         | 1664 |

**Newick Tree of Mammalian MDC1**

(manatee:0.0873606, ((human:0.0506362, (baboon:0.0426609, rhesus:0.0216001):0.0201454):0.130203, ((rhino:0.0885826, horse:0.140875):0.0356451, ((cat:0.013552, tiger:0.0238696):0.10227, (dog:0.102894, (panda:0.0927121, (polecat:0.082205, walrus:0.069215):0.0078292):0.00246621):0.0230752):0.0619518, ((giraffe:0.0488042, (sheep:0.0362649, (waterbuffalo:0.0123944, yak:0.0225):0.019704):0.0140556):0.120944, (minke whale:0.032485, (dolphin:0.0209078, fwdolphin:0.0351586):0.0168106):0.0517353):0.0113368, (pig:0.162404, (camel:0.0307988, alpaca:0.0352585):0.0830175):0.0077372):0.0354452):0.00777303):0.019268):0.0873606);

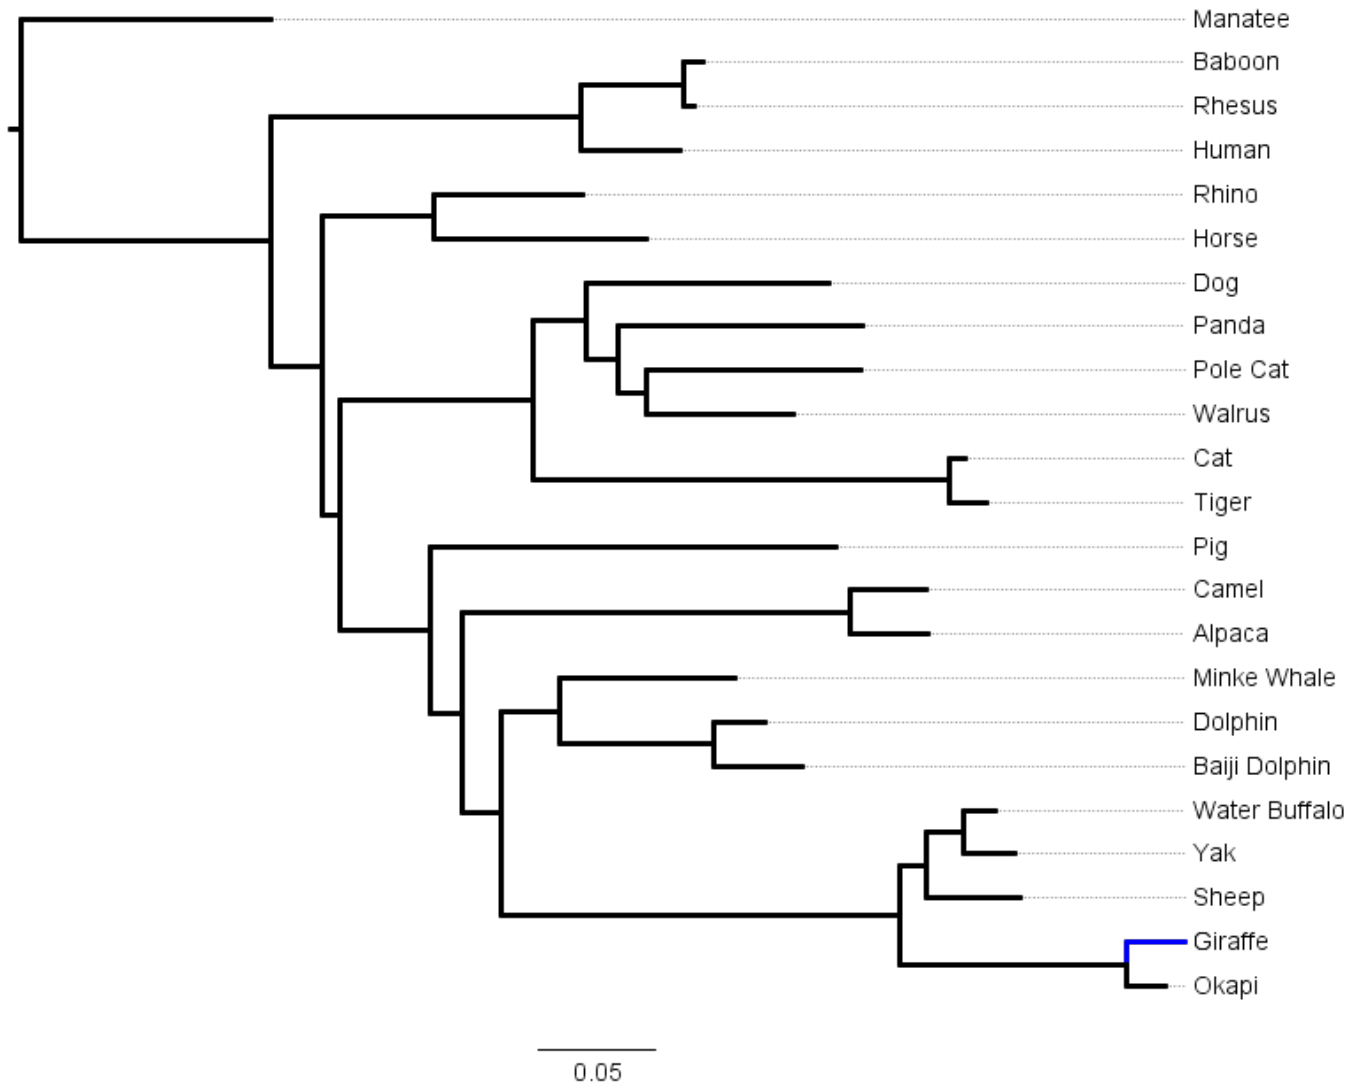

**Locus Name:** Mediator Of DNA-Damage Checkpoint 1 (**MDC1**)

**Locus Name: Exonuclease 1 (EX01)**

ENSBTAT00000012365 EX01-201 exonuclease 1DNA mismatch repair, essential for meiosis  
mouse: reduced life span, lymphoma development, and male/female sterility due to defective meiosis

PP2: (Giraffe) P587S

Giraffe: V142I UIS, G495D UIS, S579R UPS, P587S UIS, D639N UPS, S645R UIS, Q663E UPS, H714N UPS,  
S733I UIS, R750K UIS, P796S UIS

Giraffe/Okapi: E336K UIS, S492R UIS, S459G UPS, I606L UPS, T609A UIS

**Protein sequence Alignment of Cow, Giraffe and Okapi Exo1**

|         |     |                                                                                                                   |     |
|---------|-----|-------------------------------------------------------------------------------------------------------------------|-----|
| Cow     | 1   | MGIHGLLQFIKEASEPIHIRKYKGQVVAVDTCWLHKGAVACA EK LAKGEPTEKYVGF                                                       | 60  |
| Giraffe | 1   | .....V.....R....D.....                                                                                            | 60  |
| Okapi   | 1   | .....V.....R....D.....                                                                                            | 60  |
| Cow     | 61  | KLVNMLLSHG I K P I L V F D G C T L P S K K E V E K S R R E R R Q A N L L K G K Q L L R E G K V S E A R E C F I    | 120 |
| Giraffe | 61  | .F.....T                                                                                                          | 120 |
| Okapi   | 61  | .F.....T                                                                                                          | 120 |
| Cow     | 121 | RSINITH T M A H N V I K A A R S Q G V D C L V A P Y E A D A Q L A Y L N K A G I V Q A V I T E D S D L L A F G C K | 180 |
| Giraffe | 121 | .....I.....                                                                                                       | 180 |
| Okapi   | 121 | .....S.....                                                                                                       | 180 |
| Cow     | 181 | KVILKMDQFGNGLEVDQARLG MCKQLGDVFTEEKFRYMCILSGCDYLSSLRGIGLAKACK                                                     | 240 |
| Giraffe | 181 | .....                                                                                                             | 240 |
| Okapi   | 181 | .....                                                                                                             | 240 |
| Cow     | 241 | LLRLANNPDILKVV RK IGHY L K M N I T V P E D Y I K G F I R A N N T F L Y Q L V F D P I K R K L I P L N A            | 300 |
| Giraffe | 241 | .....I.....                                                                                                       | 300 |
| Okapi   | 241 | .....I.....                                                                                                       | 300 |
| Cow     | 301 | YEDDVDPK T L S Y A G Q Y V D D S I A L Q I A L G N K D I N T L E Q I D H Y N P D T A M P A Q S R S H S W T D K A  | 360 |
| Giraffe | 301 | .....Q.....V.....K...D.....                                                                                       | 360 |
| Okapi   | 301 | .....V.....K...D.....                                                                                             | 360 |
| Cow     | 361 | CQKSSNINSIWH R N Y C P R R E L D I V S D T K V K E N P S T V G I K Q V I S I K G L N L P R K S S I V K R P        | 420 |
| Giraffe | 361 | .....T.....                                                                                                       | 420 |
| Okapi   | 361 | .....F.....T.....                                                                                                 | 420 |
| Cow     | 421 | RSEELSEDDMLDQYSTSFTKKIKKNSCEGNKSLNSSELF T P D L V D G T T V K K S L S T P P T T R                                 | 480 |
| Giraffe | 421 | .....M.....                                                                                                       | 480 |
| Okapi   | 421 | .....M.....N.....                                                                                                 | 480 |
| Cow     | 481 | NKFAAFLQRKNEESGAVVPGTRIRFFSNLSADCIS K K A S S Q P L A E T A V T D K E T D A G E                                   | 540 |
| Giraffe | 481 | ...T...RD...I...T...N.....                                                                                        | 540 |
| Okapi   | 481 | ...T...R...T...N.....                                                                                             | 540 |
| Cow     | 541 | PDCLEDK K L V D T S V S H N S S E Q I P D D V T V M A E E S Q S F K T S T F T R T I S P P T L G T L R S C F S W S | 600 |
| Giraffe | 541 | .....G.....R.....S.....                                                                                           | 600 |
| Okapi   | 541 | .....T...L...G.....                                                                                               | 600 |
| Cow     | 601 | GSLGDISRT P S P S T A L Q Q F R R K S D S S T S L P E N T E K S D I A P L K S D E S S D E S H P L H D V G C       | 660 |
| Giraffe | 601 | ...L..A.....I..L.NV...R.....W                                                                                     | 660 |
| Okapi   | 601 | ...L..A.....L..V.....W                                                                                            | 660 |
| Cow     | 661 | SSQSQESMDLSPHN LNASKLSQPSSKSDSDSDCNFKSLDKQGNQKSKLHLHFHFSK K D T                                                   | 720 |
| Giraffe | 661 | ..E.....E.....S.....N.....                                                                                        | 720 |
| Okapi   | 661 | .....I.....E.....S.....                                                                                           | 720 |
| Cow     | 721 | PLRNKIPGLYKSSSVDSLSTTKIKPLV PARASGLSKKPPSVH K R N H H N A E N K P G L Q I K I N                                   | 780 |
| Giraffe | 721 | L.....I...N.....K.....S.I.....Q.....                                                                              | 780 |
| Okapi   | 721 | L.....S.I.....Q.....                                                                                              | 780 |
| Cow     | 781 | ELWKNFVFKK D S E K L P S C K K P D P L S P V K D N I Q L T P E E E D I F N N S E C M L V Q R A L F Q              | 835 |
| Giraffe | 781 | .....S.....H.....                                                                                                 | 835 |
| Okapi   | 781 | .....H.....                                                                                                       | 835 |

**Newick Tree of Mammalian EX01**

```
(manatee:0.0445111, ((bushbaby:0.0799495, (rhesus:0.0269871, (organutan:0.0243306,
(baboon:0.00390335, human:0.00679214):0.00337844):0.0053381):0.0630245):0.0081005,
(((tiger:0.00598482, cat:0.00710319):0.0720242, (dog:0.0512731,
walrus:0.0616718):0.0117469):0.02554, (rhino:0.0587794, horse:0.0801692):0.0144952):0.00572285,
(pig:0.0691076, ((spermwhale:0.0124042, (minkewhale:0.0105979, (dolphinfw:0.00847203,
orca:0.0145474):0.00829768):0.0021954):0.0231251, ((giraffe:0.0170079,
okapi:0.00843537):0.0152493, ((waterbuffalo:0.012766, (cow:0.00382309,
yak:0.00582731):0.00425838):0.0101573, (tibetantlp:0.00874572, (goat:0.000995443,
sheep:0.00501062):0.00333675):0.00833323):0.00294327):0.0335305):0.0202126):0.017265):0.0050006) :
0.0445111);
```

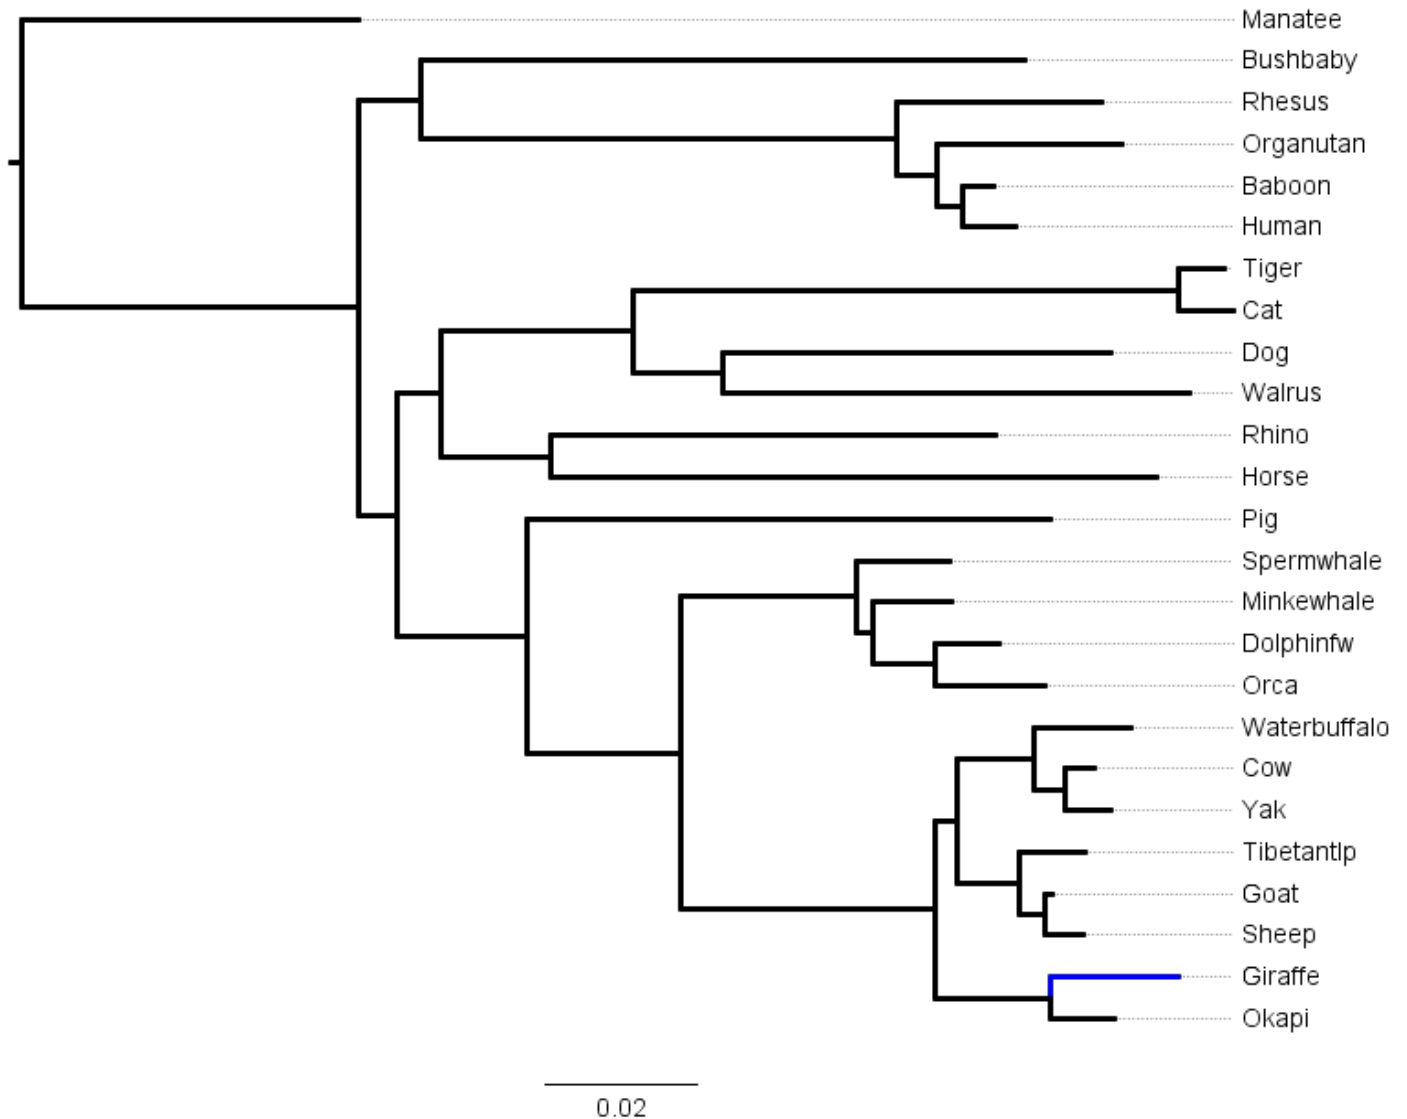

**Locus Name: Exonuclease 1 (EX01)**



**Locus Name: Nibrin (NBN)**

ENSBTAT00000017598 NBN-201 component of MRN complex dsDNA break repair, chromosome integrity  
mouse: impaired extraembryonic tissue growth and early embryonic death to growth retardation, lymphoid defects, lymphoma susceptibility, and failure of oogenesis. Null heterozygotes are cancer prone

PP2: (Giraffe) S278V, L490S

Giraffe: P6S UIS, P10L UPS, S277V UPS, H299R UPS, P339R UPS, L351V UIS, D372H UPS, H437P UPS, S463A UPS, Q474E UIS, T487V UPS, C489F UPS, N505T UPS, V516A UPS, N519K UPS, Y524H UPS, A525P UPS, P531A UPS, E572A UPS, I608T UPS, V735I UIS

**Protein sequence Alignment of Cow, Giraffe and Okapi NBN**

|         |     |                                                                |     |
|---------|-----|----------------------------------------------------------------|-----|
| Cow     | 1   | MWKLVPAAAGPAREPYRLLTGVEYIVGRKNCGILIEDDQSI SRNHATLTANFSVTNLSQTD | 60  |
| Giraffe | 1   | .....S...L.....                                                | 60  |
| Okapi   | 1   | .....Q.....                                                    | 60  |
|         |     |                                                                |     |
| Cow     | 61  | EIPVLTIKDNSKYGTFVNEEKMQNGLSQILKSGDRVTFGVFESKFRVEYEPLVACSSCLD   | 120 |
| Giraffe | 61  | .....                                                          | 120 |
| Okapi   | 61  | .....V.....                                                    | 120 |
|         |     |                                                                |     |
| Cow     | 121 | VSGKTALSHAILQLGGLTVNNWTEECTHLVMVSVKVTIKTICALICGRPIVKPEYFTEFL   | 180 |
| Giraffe | 121 | .....                                                          | 180 |
| Okapi   | 121 | .....R.....                                                    | 180 |
|         |     |                                                                |     |
| Cow     | 181 | KAVQSKKQLPEIESFYPPVDEPAIESKNIDL SGRQERKQIFKGKTFVFLNAKQHKKLSAA  | 240 |
| Giraffe | 181 | .....P.....GN.....                                             | 240 |
| Okapi   | 181 | .....P.....                                                    | 240 |
|         |     |                                                                |     |
| Cow     | 241 | VIFGGGDARLITEENKEDDSFFSAPGTCVVDAGLTDSQTFIPDSQKKWIHSIMDILQRRG   | 300 |
| Giraffe | 241 | .....E.....V..L.....H.                                         | 300 |
| Okapi   | 241 | .....T.....LV.....Q.                                           | 300 |
|         |     |                                                                |     |
| Cow     | 301 | LRPIPEAEIGLAVLFVTTENYCDPQQQPSTGLKTTTPGPSLSQALPANENLMPNASVNTT   | 360 |
| Giraffe | 301 | .....I.....R.....V.....                                        | 360 |
| Okapi   | 301 | .....I.....K...D...A.                                          | 360 |
|         |     |                                                                |     |
| Cow     | 361 | TYVADTESEQADTCMDLSEPKKEIKIFGMEPKCRILSQETSTVKKPHKISSNNNIVSNTL   | 420 |
| Giraffe | 361 | A.....H.....                                                   | 420 |
| Okapi   | 361 | A.....V.....S.....                                             | 420 |
|         |     |                                                                |     |
| Cow     | 421 | VRMKIPNYQLSPTKVPVHNKSRGWPSQHQQTNSIRDYFQPLTSPQKRERDEENQEMSLSK   | 480 |
| Giraffe | 421 | .....F.P.....K.....ATK.....E..S..                              | 480 |
| Okapi   | 421 | .....F.....K.....N..K.....                                     | 480 |
|         |     |                                                                |     |
| Cow     | 481 | SARMETSCSLLLEQTQPTTSLIRKNKDEHLSQNVLVEENPDNSYADTNVKPTVKNYANKSL  | 540 |
| Giraffe | 481 | .....V.F..S.....A.S...T...P....A.KT...HP..DL.A.....            | 540 |
| Okapi   | 481 | .....I.....S...I.....GK.....L.....                             | 540 |
|         |     |                                                                |     |
| Cow     | 541 | FTENLKSKKRKEIDDLAIEDEVLEQLFKDTELESEVVKVQKQEEDINVRKRLRLDKETN    | 600 |
| Giraffe | 541 | ...K...N.....A.....P...M...                                    | 600 |
| Okapi   | 541 | ...K...E.....E.....T...P...I...                                | 600 |
|         |     |                                                                |     |
| Cow     | 601 | VTFNDETIPESNKISQENEIKKKCELKKESSLWSTKELSNCELQDGDEMPLPKKVLLTEFR  | 660 |
| Giraffe | 601 | ..C...T.....G.....G.....R.....                                 | 660 |
| Okapi   | 601 | A.....E.....G.P.....                                           | 660 |
|         |     |                                                                |     |
| Cow     | 661 | SLVVCNSTSRNASNVNNDY GELKNFKKFKKVTFPGAGKLPHIIGGSDLIAHHARKNTELE  | 720 |
| Giraffe | 661 | ...R.....S.....                                                | 720 |
| Okapi   | 661 | .....S.....                                                    | 720 |
|         |     |                                                                |     |
| Cow     | 721 | EWLRQEME VQNQHAKEDSLADDLFRYNPNVKRRR                            | 754 |
| Giraffe | 721 | .....I.....                                                    | 754 |
| Okapi   | 721 | .....                                                          | 754 |

**Newick Tree of Mammalian NBN**

```
(African_Bush_Elephant:0.0703092, (((((((Gorilla:0.00656225, Humans:0.00142722):0.000893651,
(Bonobo:4.3724e-05, Chimpanzee:0.00794575):0.00717268):0.00826899,
(Northern_White_cheeked_Gibbon:0.00747707, Siamang:0.00453136):0.00596178):0.00471753,
(Wolf_s_Mona_Monkey:0.00776341, Olive_Baboon:0.00693344):0.0197714):0.018193,
Bolivian_Red_Howler:0.0544405):0.0568263, Phillipine_tarsier:0.0885859):0.0246784,
(European_Rabbit:0.116838, ((White_Rhinoceros:0.0799503, Horse:0.0831269):0.00665034,
(Giant_Panda:0.0434426, Dog:0.088366):0.00765649,
Siberian_Tiger:0.0672528):0.0333086):0.00192851, (Bactrian_Camel:0.104846,
((Bottlenose_Dolphin:0.0231422, Sperm_Whale:0.0277381):0.00210022,
Minke_Whale:0.0160832):0.0276671, (giraffe:0.0393298, ((Tibetan_Antelope:0.0110148,
(Sheep:0.00560167, Goat:0.0037381):0.00645804):0.0117507, (Water_Buffalo:0.00736511,
(Cow:0.00137023,
Wild_Yak:0.00128582):0.0100501):0.0129403):0.00678369):0.0613014):0.015145):0.0124811):0.00567769
):0.0019239):0.0703092);
```

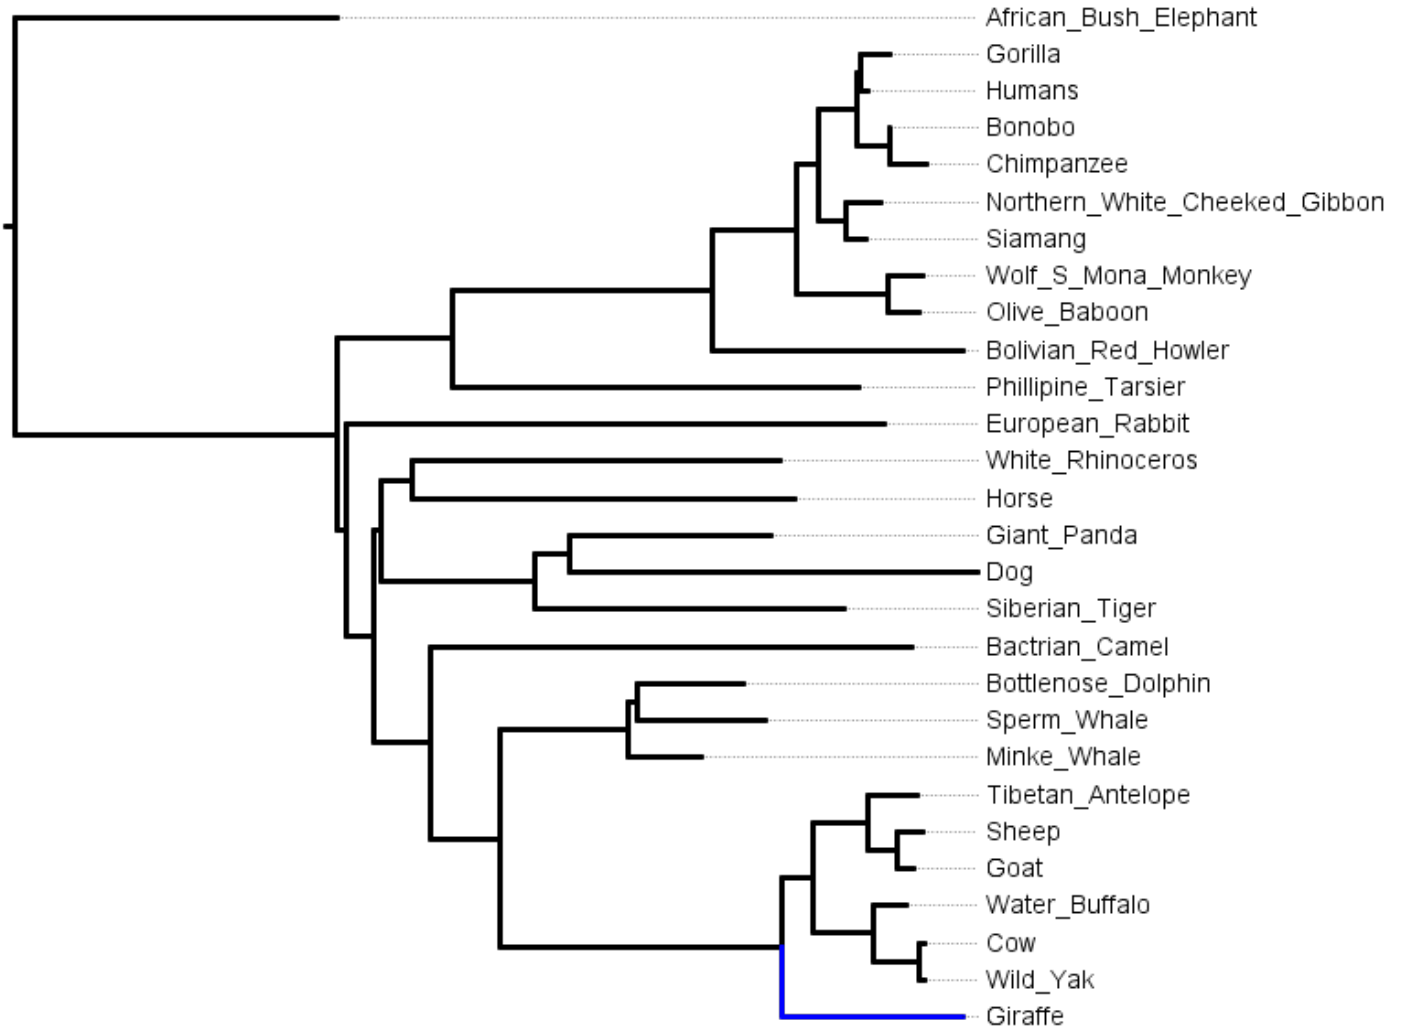

0.03

**Locus Name: Nibrin (NBN)**

**Locus Name: Meiotic Recombination 11 Homolog A (MRE11A)**

ENSBTAT0000011748 MRE11A-201 component of MRN complex dsDNA break repair, chromosome integrity  
 mouse: chromosome instability human: Ataxia-telangiectasia-like disorder 1 (ATLD1)  
 [MIMOUSE:604391]: A rare disorder characterized by progressive cerebellar ataxia, dysarthria, abnormal eye movements, and absence of telangiectasia. Hypersensitivity to ionizing radiation.

PP2: All benign  
 PSG: D647S

Giraffe: N34H UIS, A539D UIS, A564T UPS, A566G UPS, S590L UPS, D647S UIS  
 Giraffe/Okapi: F660L UPS, M699V UPS

**Protein sequence Alignment of Cow, Giraffe and Okapi MRE11A**

|         |     |                                                               |     |
|---------|-----|---------------------------------------------------------------|-----|
| Cow     | 1   | MSPADALDDENTFKILVATDIHLGFMEKDAVRGNDTFVTLDEILRLAQENDVDFILLGGD  | 60  |
| Giraffe | 1   | .....H.....F.....                                             | 60  |
| Okapi   | 1   | .....F.....                                                   | 60  |
| Cow     | 61  | LFHENKPSRKTLLHTCLELLRKYCMGDRPVQFEILSDQSVNFGFSKFPWVNYQDGNLNISV | 120 |
| Giraffe | 61  | .....I                                                        | 120 |
| Okapi   | 61  | .....I                                                        | 120 |
| Cow     | 121 | PVFSIHGNHDDPTGADALCALDILSCAGFVNHFGRSMSVEKIDISPVLLQKGSTKIALYGL | 180 |
| Giraffe | 121 | .....V.....                                                   | 180 |
| Okapi   | 121 | .....V.....                                                   | 180 |
| Cow     | 181 | LGSIPDERLYRMFVNKKVTMLRPKEDENSWFNLFVIHQNRSKHGSTNFIPFQFLDDFIDL  | 240 |
| giraffe | 181 | .....                                                         | 240 |
| okapi   | 181 | .....                                                         | 240 |
| Cow     | 241 | VIWGHEHECKIAPTQKNEQQLFYVSQPGSSVVTSLSPGEAVKKHIGLLRIKGRKMMQKIP  | 300 |
| Giraffe | 241 | .....                                                         | 300 |
| Okapi   | 241 | .....                                                         | 300 |
| Cow     | 301 | LRTVRQFFMEDVVLADHPDIFNPDNPKVTQVIQNFCEKVEEMLENAERERLGNSSQPEK   | 360 |
| Giraffe | 301 | .....D.....R.....                                             | 360 |
| Okapi   | 301 | .....D.....G.....R.....                                       | 360 |
| Cow     | 361 | PLIRLRVDYSGGFEPFVLRFSQKFVDRVANPKDVIHFFRHREQKENTGEEINFGKFISK   | 420 |
| Giraffe | 361 | .....                                                         | 420 |
| Okapi   | 361 | .....                                                         | 420 |
| Cow     | 421 | PSEGTTLRVEDLVKQYFQTAEKNVQLSLLTERGMGEAVQEFVDKEEKDAIEELVKYQLEK  | 480 |
| Giraffe | 421 | .....                                                         | 480 |
| Okapi   | 421 | .....                                                         | 480 |
| Cow     | 481 | TQRFLKERHIDALEDKIDEVRRFRFRESRQKNTNEEDDEVREAMSRARALRSQSEDAASAL | 540 |
| Giraffe | 481 | .....D.....                                                   | 540 |
| Okapi   | 481 | .....                                                         | 540 |
| Cow     | 541 | TAEDLMSIDLAEQMADSDSISIKAAANKGRGRGRGQRGGRGQNSMSRRGSQRGRAGTSLE  | 600 |
| Giraffe | 541 | .....IT.G.....V.....L.....                                    | 600 |
| Okapi   | 541 | .....IM.....V.....                                            | 600 |
| Cow     | 601 | ISTQGRGSKATTSTSRNMSIIDAFKSTRQQPSRVATKNTYEVIEVDESDEEDVFLTTF    | 660 |
| Giraffe | 601 | .....S.....I.....L                                            | 660 |
| Okapi   | 601 | .....I.....L                                                  | 660 |
| Cow     | 661 | KTDQRGSSTSSSSKPMSSQSQITKGVDFESDEEDDDDDPFMNLSCLRNR             | 709 |
| Giraffe | 661 | .....AR.....V.....                                            | 709 |
| Okapi   | 661 | .....AR.....E.....V.....V.....                                | 709 |

**Newick Tree of Mammalian MRE11A**

(rat:0.038408, ((Dog:0.0155616, panda:0.024859):0.0125348, (((Horse:0.0403516, rhino:0.0438057):0.00950569, ((Human:0.00498374, (baboon:0.0011894, rhesus\_monkey:0.00307501):0.00212889):0.0252834, bushbaby:0.0362617):0.00368096):0.001105, ((Freshwater\_Dolphin:0.00537519, Killer\_Whale:0.0103065):0.00456771,

Sperm\_Whale:0.0170226):0.0262469, (camel:0.0401972, ((Cow:0.0017424, Yak:0):0.00531566,  
 (Water\_Buffalo:0.00877464, ((Gerenuk:0.00202422, (Goat:0.00302343,  
 Tibetan\_Antelope:0.00407389):0.00223722):0.00230315, (Giraffe:0.00787458,  
 Okapi:0.00490096):0.00594156):0.00393068):0.000720289):0.0270679):0.00240898):0.00592855):0.00170  
 572):0.038408);

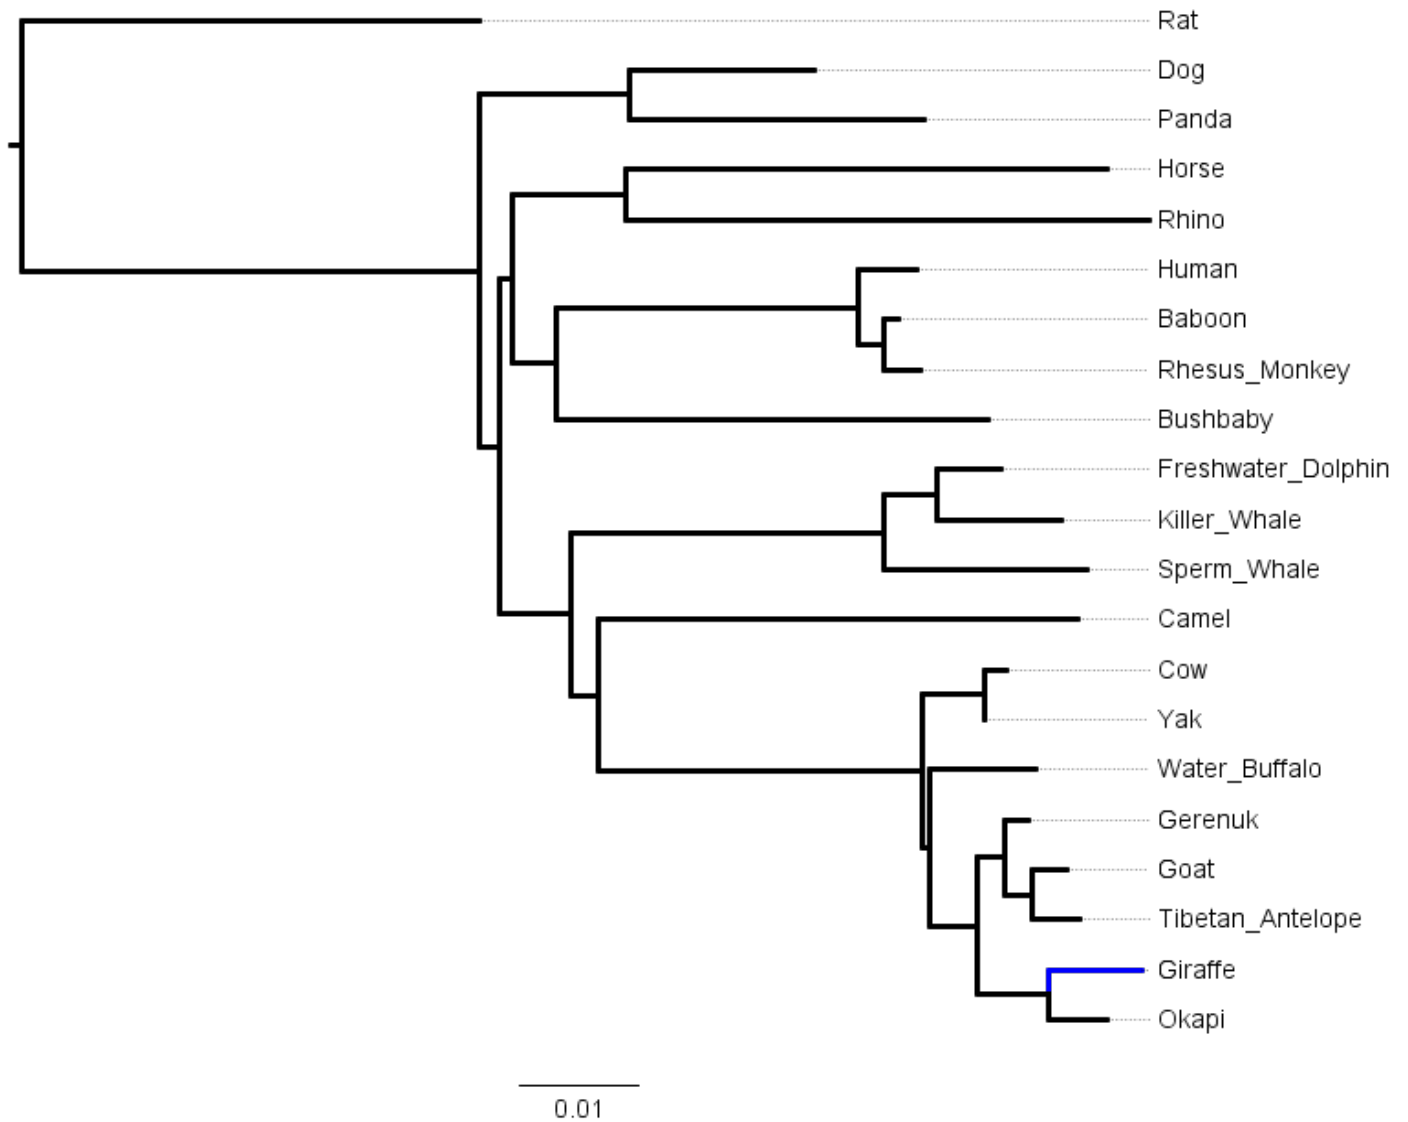

**Locus Name: Meiotic Recombination 11 Homolog A (MRE11A)**

**Locus Name: Nucleic Acid Binding Protein 1, SOSB2, (NABP1)**

ENSBTAT00000024821 NABP1-201 component of SOSS complex dsDNA break repair, chromosome integrity  
no mutation in m/h described

PP2: (Giraffe) G157C; (Okapi) G157V

Giraffe: P8F UPS, K15R UIS, S139R UPS, G157C UPS, A185P UIS  
Giraffe/Okapi: T192S UIS

**Protein sequence Alignment of Cow, Giraffe and Okapi NABP1**

|         |     |                                                              |     |
|---------|-----|--------------------------------------------------------------|-----|
| Cow     | 1   | MNGVRDPPLFIKDIKPLKLNLVVFFIVLEIGRVTKTKDGHEVRSCKVADKTGSITISVWD | 60  |
| Giraffe | 1   | .....F.....R.....                                            | 60  |
| Okapi   | 1   | .....N.L.....                                                | 60  |
|         |     |                                                              |     |
| Cow     | 61  | EIGGLIQPGDIIRLTRGYASMWKGLTLYTGRGGELQKIGEFMVSSELPNFSEPNPDYR   | 120 |
| Giraffe | 61  | .....                                                        | 120 |
| Okapi   | 61  | .....                                                        | 120 |
|         |     |                                                              |     |
| Cow     | 121 | GQQNKGAHNEQKNNMNNNNVGTGTGTFGPMGNVQTGAEARGCQFSYAGRSNGRGPINPQ  | 180 |
| Giraffe | 121 | .....R.....V.....CP.....L....                                | 180 |
| Okapi   | 121 | .....V.....VP.....L....                                      | 180 |
|         |     |                                                              |     |
| Cow     | 181 | LPGTANNQTVMTTISNGRDPRAFKR                                    | 206 |
| Giraffe | 181 | ....P.....S.....                                             | 206 |
| Okapi   | 181 | .....S.....                                                  | 206 |

**Newick Tree of Mammalian NABP1**

((((Humans:1.35158e-05, Northern\_White\_cheeked\_Gibbon:0.00490052):0.000173763,  
(Bonobo:0.000230472, Sumatran\_Orangutan:0.00962198):0.0047895):0.0126725,  
Olive\_Baboon:0.00724493):0.0153951, (White\_Rhinoceros:0.00969271, ((Pacific\_Walrus:0.0029945,  
(Domestic\_Cat:0, Siberian\_Tiger:0.00492291):0.00688252):0.0190245,  
(((Bottlenose\_Dolphin:0.00487486, (Minke\_Whale:0.00492623, Killer\_Whale:0.00492623):2.9495e-05,  
Sperm\_Whale:0):5.13674e-05):0.00420664, Wild\_Boar:0.015666):0.0046031,  
Alpaca:0.0103256):0.00635077, ((giraffe:0.018899, okapi:0.0105192):0.0133158,  
(Tibetan\_Antelope:0.0147935, ((Goat:0, (Sheep:4.49295e-05, Water\_Buffalo:0.00486911):4.64641e-  
05):0.000157009, (cow:0, Wild\_Yak:1.22161e-  
05):0.00472713):0.00489268):0.00182553):0.0178111):0.00476268):0.0096721):0.0153951);

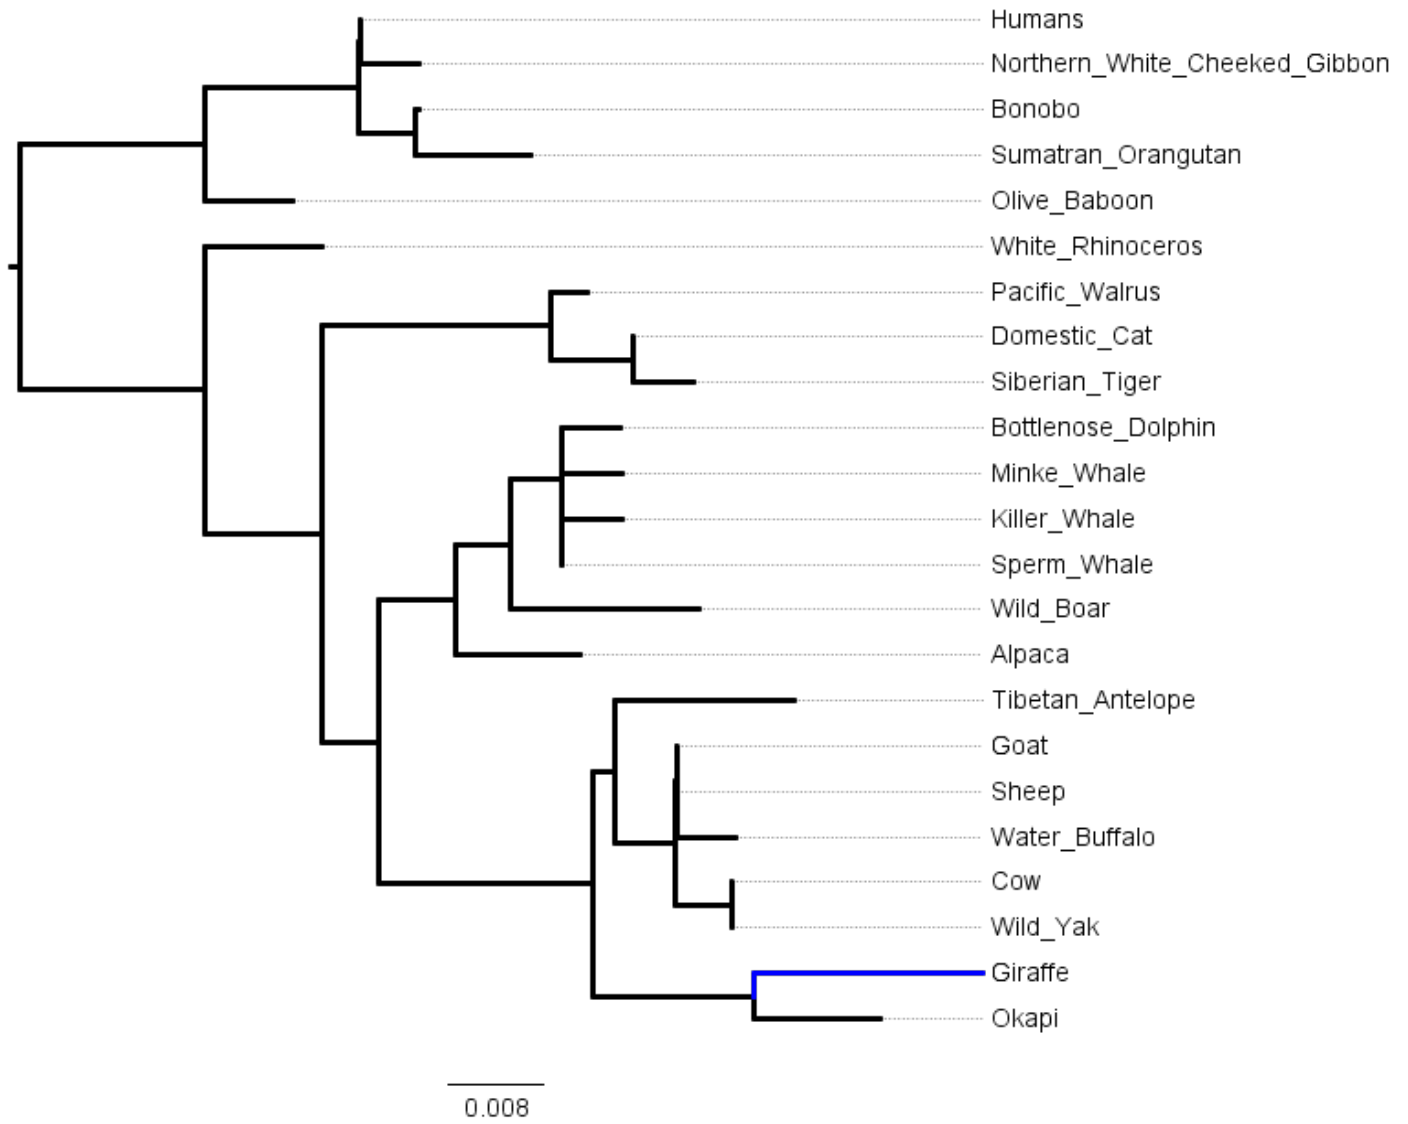

**Locus Name: Nucleic Acid Binding Protein 1, SOSB2, (NABP1)**

**Locus Name: Nudix (Nucleoside Diphosphate Linked Moiety X)-Type Motif 15 (NUDT15)**

ENSBTAT00000025978 NUDT15-201 8-oxo-dGTP diphosphatase DNA repair  
human: SNP associated with thiopurine-induced early leukopenia

PP2: (Giraffe) G41C,

Giraffe: F38S UPS, G41C UIS, S42G UPS

**Protein sequence Alignment of Cow, Giraffe and Okapi NUDT15**

|         |     |                                                               |     |
|---------|-----|---------------------------------------------------------------|-----|
| Cow     | 1   | MTASVEPRGRRPGVGVVVVTSGRHPRCVLLGKRKGSFGAGSFQLPGGHLEFGETWEECA   | 60  |
| giraffe | 1   | .....S..CG...S.....                                           | 60  |
| okapi   | 1   | .....R.....                                                   | 60  |
|         |     |                                                               |     |
| Cow     | 61  | QRETWEEAALHLKKNVRFASVVNSFIEKENYHYVTILMKGEVDLTHDSEPKNVEPEKNESW | 120 |
| Giraffe | 61  | .....V.....                                                   | 120 |
| okapi   | 61  | .....V.....                                                   | 120 |
|         |     |                                                               |     |
| Cow     | 121 | EWVPWEEFPPLDQLFWGLRCLKEQGYDPFKEDLDHLVGKYGSHLEVNKEIH           | 171 |
| Giraffe | 121 | .....A.....T.                                                 | 171 |
| okapi   | 121 | .....A.....                                                   | 171 |

**Newick Tree of Mammalian NUDT15**

(polar\_bear:0.054059, (polecat:0.0716555, ((walrus:0.0192266, weddel\_seal:0.0164991):0.0390647, (tiger:0.0104963, cat:0.0655627):0.020215):0.00836249, (dog:0.0476442, (((flying\_fox\_bat:0.0308995, rhino:0.0191318):0.00240289, (((minke\_whale:0.0198181, dolphin:0.0219912):0.00377589, baiji\_dolphin:0.029413):0.00875072, camel:0.0323124):0.0104892, (horse:0.0271261, bushbaby:0.0555545):0.0096214):0.00228131):0.00462611, ((pig:0.0534803, manatee:0.0699637):0.0149886, (orangutan:0.0281216, human:0.00915845):0.0089688, baboon:0.0225089):0.0140251):0.00950781):0.00607612, (giraffe:0.0315998, ((tibetan\_antelope:0.0121413, sheep:0.0115307):0.00753406, okapi:0.00430192):0.00439255, (cow:0.000458753, water\_buffalo:0.0113064):0.00758047):0.00142054):0.0176639):0.0304707):0.00753779):0.0103838):0.054059);

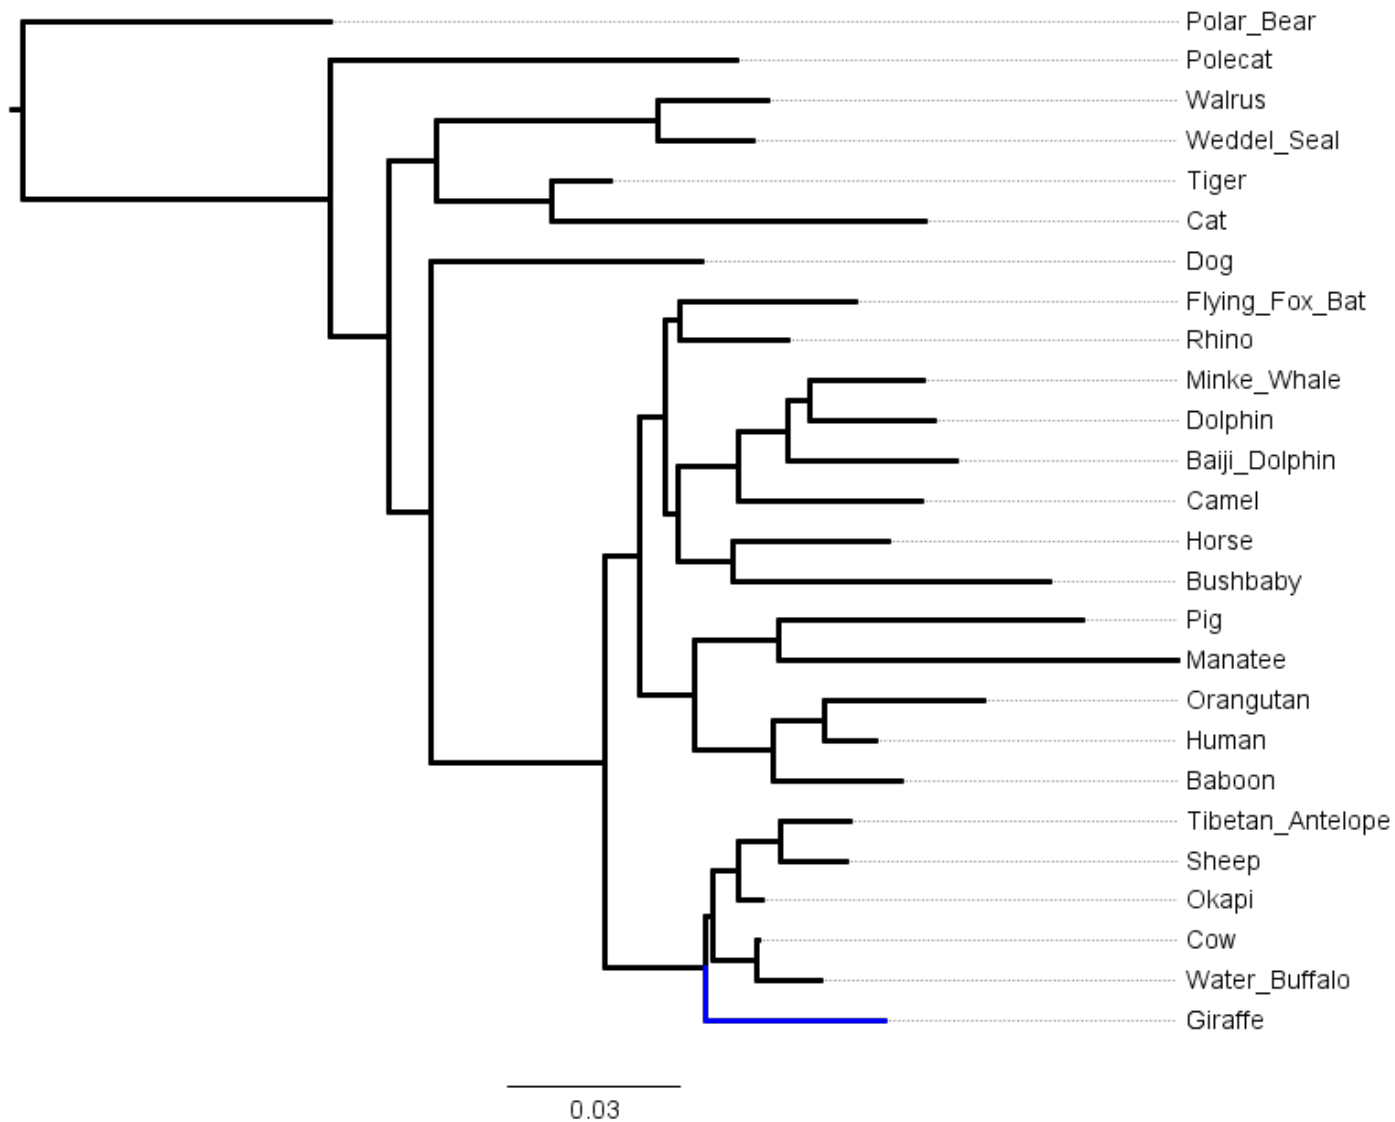

**Locus Name: Nudix (Nucleoside Diphosphate Linked Moiety X) -  
Type Motif 15 (NUDT15)**



**Locus Name: SAC3 domain containing 1 (SAC3D1)**

ENSBTAT0000002904 SAC3D1-201 SAC3 domain containing protein centrosome duplication and mitotic progression

mouse: null allele had increased numbers of myeloid and erythroid progenitor cells. Mice homozygote for a null allele had these features plus mild spleen and thymus hyperplasia, an increased T cell proliferative response, and enhanced IgM secretion by B cells to IL-5.

PP2: (Giraffe) P36S, D46H

Giraffe: P36S UPS, D46H UIS, E85D UIS, GQ 269-270 deletion UIS  
Giraffe/Okapi: T90N UPS, A228S UPS, G302E UIS

**Protein sequence Alignment of Cow, Giraffe and Okapi SAC3D1**

|         |     |                                                               |     |
|---------|-----|---------------------------------------------------------------|-----|
| Cow     | 1   | MPGYELPVGTCCLDMCPAAERAQREKERLHRFEVVPGCRRDRPRADPQRAVKEYSRPAAG  | 60  |
| Giraffe | 1   | .....AS..PG.....H.....                                        | 60  |
| Okapi   | 1   | .....A....G.....                                              | 60  |
|         |     |                                                               |     |
| Cow     | 61  | KNRPPPSQLRPPSVLLATVRYLASEVAERTDASCAEVASFVADRLRAVRLDLALQTASDV  | 120 |
| Giraffe | 61  | .I.....D...N.....S....                                        | 120 |
| Okapi   | 61  | .I.....N.....S....                                            | 120 |
|         |     |                                                               |     |
| Cow     | 121 | ETALVLESALAVLLAVVARLGNATHGVPDPLLQAQVQESFGSLRRCYALGAGPHPRQA    | 180 |
| Giraffe | 121 | .....A.....                                                   | 180 |
| Okapi   | 121 | .A.....A.....                                                 | 180 |
|         |     |                                                               |     |
| Cow     | 181 | TFQGLFLLYNLGSVEALHEILRLPALRSCPALRTALAVDSAFREGNAARLFRLRLTPY    | 240 |
| Giraffe | 181 | .....V.Q.....A.....S.....M...                                 | 240 |
| Okapi   | 181 | .....V.Q.....A.....F.....S.....                               | 240 |
|         |     |                                                               |     |
| Cow     | 241 | LQSCAVQCHVGRARRGALARLARLALSTPGQTLPLGFMVHLLALDGPNEARDLCQAHGLPL | 300 |
| Giraffe | 241 | .....--.....K.....                                            | 298 |
| Okapi   | 241 | .....K.....                                                   | 300 |
|         |     |                                                               |     |
| Cow     | 301 | DGQERVVFLRGRYTEEGLPPAGTCQIILVGNKLGRTLEDVAMAEEDAEVDRPTTEV      | 358 |
| Giraffe | 299 | .E.....V.....V.....P.A                                        | 356 |
| Okapi   | 301 | .E.....C.....V.....V.....-.....P.A                            | 355 |

**Newick Tree of Mammalian SAC3D1**

((rat:0.0481168, mouse:0.0464892):0.0668792, (((human:0.0222544, (baboon:0.00562448, macaque:0):0.00904964):0.0431507, lemur:0.0859029):0.0146379, ((black\_flying\_fox:0.0479258, little\_brown\_bat:0.100247):0.00646711, (rhino:0.0247291, (cat:0.039166, (walrus:0.0270068, dog:0.0424409):0.00919329):0.00319157):0.0123405, (alpaca:0.074389, (pig:0.0561884, (((orca:0.0048984, bottle\_nose\_dolphin:0.00633791):0.00712948, baiji\_dolphin:0.00700041):0.00168236, minke\_whale:0.00535034):0.0279719, ((giraffe:0.0173528, okapi:0.00531299):0.0142441, (sheep:0.0140873, (cow:0.00822133, yak:0.000217642):0.0173079):0.00614948):0.0199847):0.00830785):0.00618363):0.0129237):0.0107031):0.0124859):0.0668792);

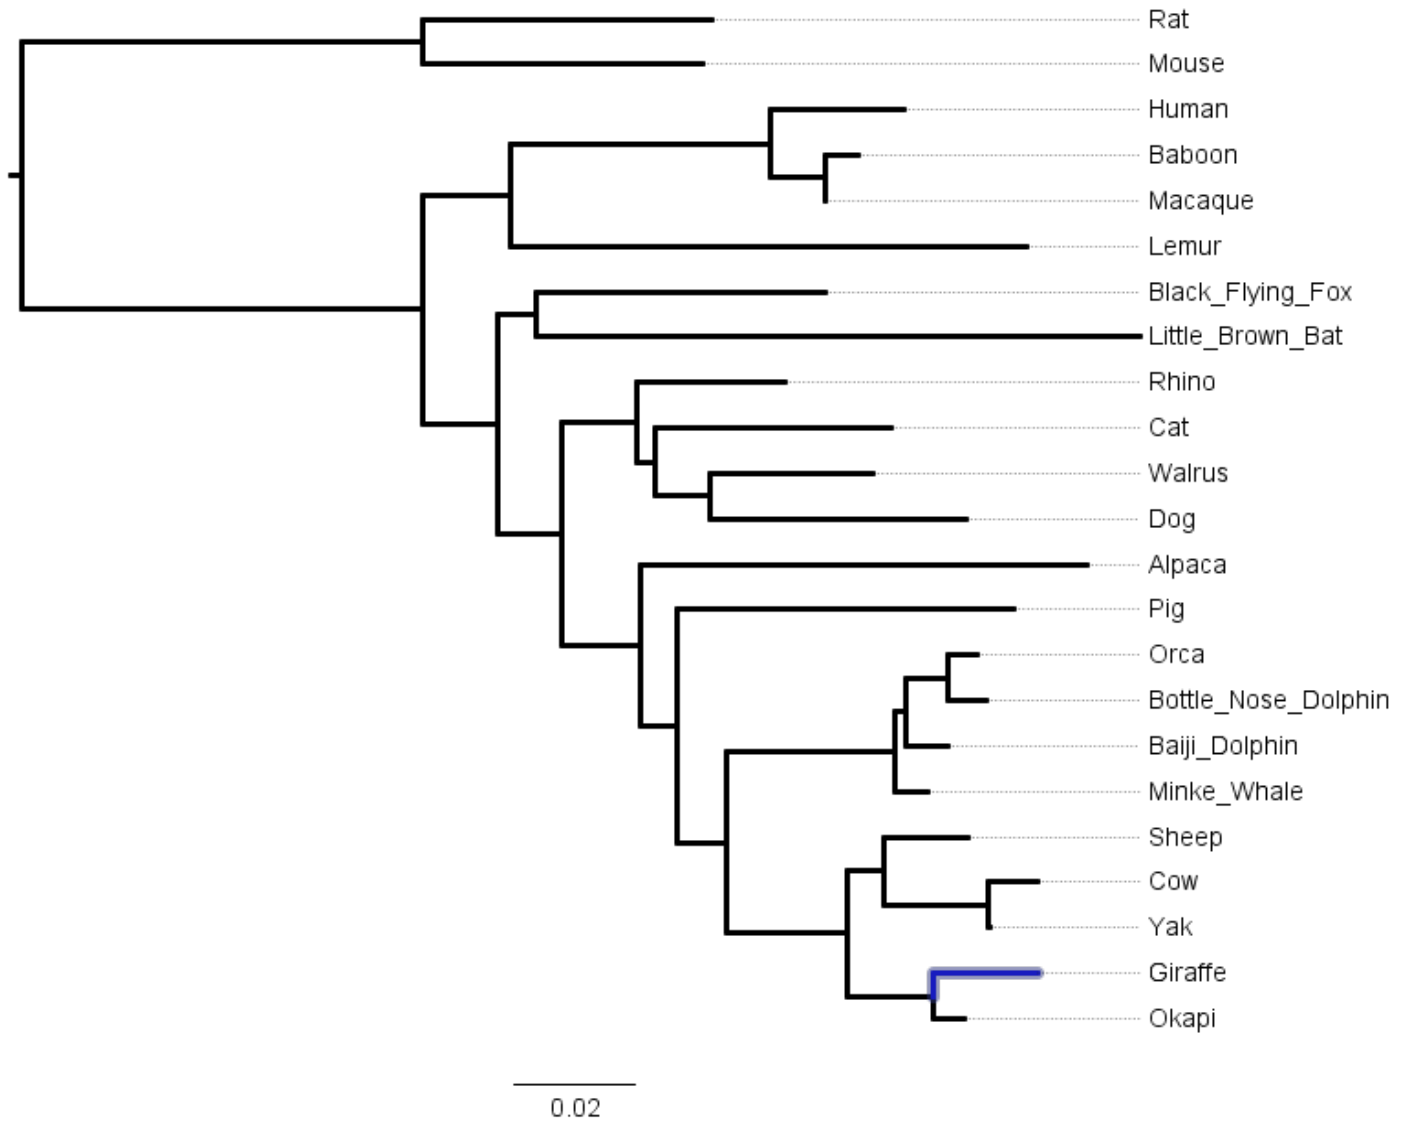

Locus Name: SAC3 domain containing 1 (SAC3D1)

**Locus Name: HAUS augmin-like complex, subunit 2 (HAUS2, CEP27)**

ENSBTAT00000045340 CEP27-201 centrosomal protein 27 centrosome assembly, cytokinesis  
no mutation in m/h described

PP2: (Giraffe) E59K; (Giraffe/Okapi) R110K, N186D

Giraffe: E59K UIS, S83T UPS, A234I UPS

Giraffe/Okapi: R110K UIS, N186D UIS, K213T UIS

Okapi: V140I UIS, E182K UIS, L213V UPS

**Protein sequence Alignment of Cow, Giraffe and Okapi HAUS2**

|         |     |                                                                |     |
|---------|-----|----------------------------------------------------------------|-----|
| Cow     | 1   | MAAANPWPDPATAPNAAGLLGLGHFITSELVTEEMLNISKKSTSCFVNFSRLQQITDIQAEI | 60  |
| Giraffe | 1   | ..T.S.....Q.....K.                                             | 60  |
| Okapi   | 1   | .....Q.....                                                    | 60  |
|         |     |                                                                |     |
| Cow     | 61  | YQKNLEIELLSLEKDAADVHPSFLAQKCHSLQSMNNHLEAVLKEKRSLRQRLLKPMCQG    | 120 |
| Giraffe | 61  | .....T.....K.....                                              | 120 |
| Okapi   | 61  | .....K.....                                                    | 120 |
|         |     |                                                                |     |
| Cow     | 121 | NLPIEAVYHRYMVHLLLELAVTFIERLEDHLETIRNIPHLDADLKKMSTALAKMDILVTET  | 180 |
| Giraffe | 121 | .....                                                          | 180 |
| Okapi   | 121 | .....I.....                                                    | 180 |
|         |     |                                                                |     |
| Cow     | 181 | EELAENILKWREQQKEVSSYIPKILAEKNSLHKHDVIVPPLPLTSKVNVTINAK         | 235 |
| Giraffe | 181 | .....D.....T..A.....I.                                         | 235 |
| Okapi   | 181 | .K...D.....F.....T..A.....V.....                               | 235 |

**Newick Tree of Mammalian HAUS2**

((human:0.00781634, rhesus\_monkey:0.0224282):0.0395964, (((walrus:0.0273919, weddel\_seal:0.0177438):0.00942989, dog:0.0634805):0.0157581, (tiger:0.000307832, cat:0.0125407):0.059509):0.00673875, (rhino:0.0316379, horse:0.0574269):0.033083):0.00201224, ((alpaca:0.0081809, camel:0.0264615):0.0381112, (pig:0.077705, (minkewhale:0.00665894, (spermwhale:0.0297894, baiji\_dolphin:0.0407829):0.00156408):0.0460076, (cow:0, (goat:0, sheep:0.00431966):0.000442935, tibetan\_antelope:0.00812269):0.00862458):0.00663573, (giraffe:0.0215924, okapi:0.0174681):0.0142901):0.0578789):0.00438738):0.00787604):0.0114256):0.0395964);

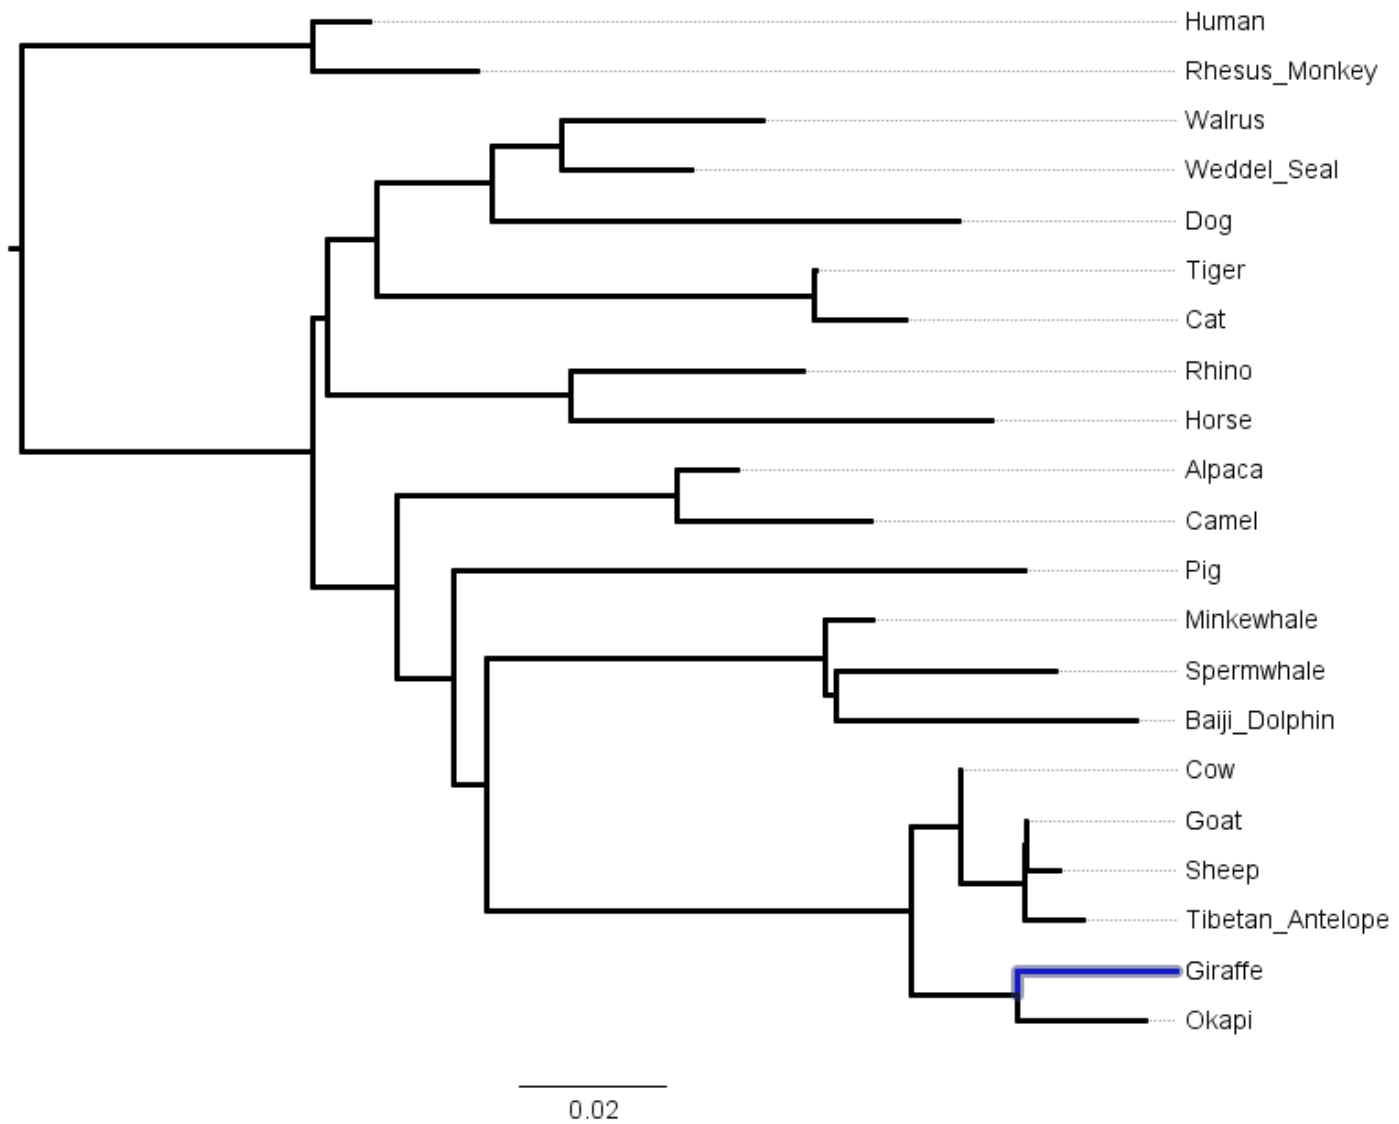

**Locus Name: HAUS augmin-like complex, subunit 2 (HAUS2, CEP27)**

**Locus Name: RCC1 Domain Containing 1 (RCCD1)**

ENSBTAT00000024803 RCCD1-201 histone demethylase complex chromosome segregation  
no mutation in m/h described

PP2: (Giraffe) P157R; (Giraffe/Okapi) R5C, A177T, A283S

Giraffe: E3K UPS, E122Q UPS, H123S UPS, P157R UIS, P200S UPS, A214V UIS  
Giraffe/Okapi: R5C UPS, G124V UPS, A177T UPS, T257S UPS, S275P UPS, S298T UPS

**Protein sequence Alignment of Cow, Giraffe and Okapi RCCD1**

|         |     |                                                               |     |
|---------|-----|---------------------------------------------------------------|-----|
| Cow     | 1   | MDEERRGTWFGFGFCGFGQALGSGGLGRQVHSPEPLRTPGGSLGVCRVASWSYTAFAVTRG | 60  |
| Giraffe | 1   | ..K.C.....D.....                                              | 60  |
| Okapi   | 1   | ....C.....D.....                                              | 60  |
|         |     |                                                               |     |
| Cow     | 61  | GRVQLSGAAGGTADGCTDAWASEELLVLLRAGPGAGAEIQAWAPGSAMRGDPLWSQAVQE  | 120 |
| Giraffe | 61  | .....A.G.....L..E.....                                        | 120 |
| Okapi   | 61  | .....A.G.....K.....L..E.....                                  | 120 |
|         |     |                                                               |     |
| Cow     | 121 | AEHGPSRDETQAGLLPLLPCARAYVSPRPPFYRPLAPTLRARRLELGAEHALLLDAAGQV  | 180 |
| Giraffe | 121 | .QSV.....V.P.....R.....T...                                   | 180 |
| Okapi   | 121 | ..RV.....P.....V.....T...                                     | 180 |
|         |     |                                                               |     |
| Cow     | 181 | FSWGAGRHRGQLGHGTLEAEPEPRLLLEALQGLRMAEVAAGGWHSVCLSETGDIYIWGNES | 240 |
| Giraffe | 181 | .....S.....P.V.....                                           | 240 |
| Okapi   | 181 | .....P.....                                                   | 240 |
|         |     |                                                               |     |
| Cow     | 241 | GQLALPTKSLAEDGKTTAGEASGLEEDGSEVKRGSAGEDGAPAPFIAVQFPALDLSPG    | 300 |
| Giraffe | 241 | .....S.....D...Q...VPG.....S.....T..                          | 300 |
| Okapi   | 241 | .....S.....D...Q...VPG.....S.....T..                          | 300 |
|         |     |                                                               |     |
| Cow     | 301 | SEAVKVSCGRSHTAVLTRTGELYTWGWGKYQLGHKDTTTLDRPCRVEYFVDKQLQVRTV   | 360 |
| Giraffe | 301 | .....                                                         | 360 |
| Okapi   | 301 | ..I.....                                                      | 360 |
|         |     |                                                               |     |
| Cow     | 361 | SCGPWNTYVYAVEKEKS                                             | 377 |
| Giraffe | 361 | .....                                                         | 377 |
| Okapi   | 361 | .....--                                                       | 375 |

**Newick Tree of Mammalian RCCD1**

(mouse:0.105706, (((baboon:0.00581647, macaque:0.00757101):0.0303074, (human:0.0144056, orangutan:0.0152905):0.0155866):0.0415576, (aardvark:0.0712829, manatee:0.0615056):0.0347084):0.00671051, (walrus:0.0965316, (pig:0.0838172, ((sperm\_whale:0.00979843, orca:0.0114241):0.0036096, rhino:0.0138793):0.0287441, ((giraffe:0.0176997, okapi:0.0119964):0.0215354, (cow:0.0132835, water\_buffalo:0.01907):0.016207):0.0539794):0.0056637):0.0108573):0.0107874):0.105706);

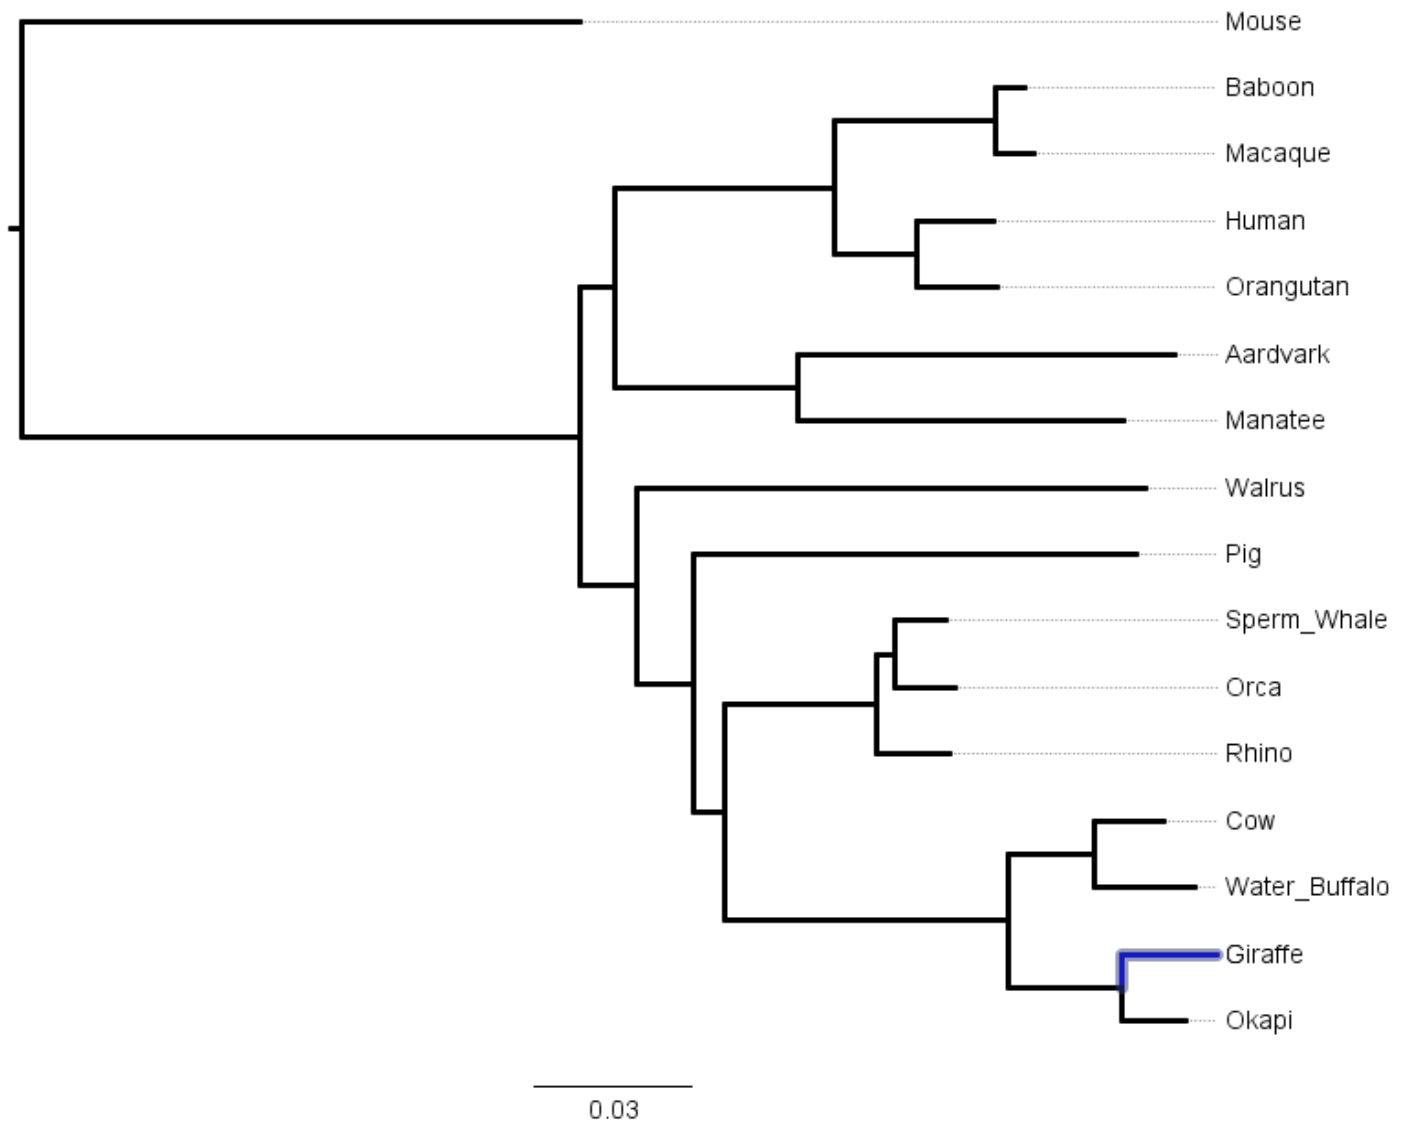

**Locus Name:** RCC1 Domain Containing 1 (RCCD1)

**Locus Name: HAUS Augmin-Like Complex, Subunit 6 (HAUS6)**

ENSBTAT00000031479 HAUS6-201 mitotic spindle assembly centrosome integrity cytokinesis  
 human: GWAS study mapped pulmonary tuberculosis susceptibility to 8 loci including HAUS6

PP2: (Giraffe) A53T, C699R, L882G; (Giraffe/Okapi) G26Y, L127T, A194T, K342G, S854H; (Okapi)  
 L127T, P500Q, L840Q, S899Y

PSG: L882G

Giraffe: A52T UIS, N240S UPS, D686G UIS, C700R UIS, L882G UPS

Giraffe/Okapi: C26Y UPS, I127T UPS, A194T UIS, F799S UIS, S854H UPS, R297S UPS

**Protein sequence Alignment of Cow, Giraffe and Okapi HAUS6**

|         |     |                                                               |     |
|---------|-----|---------------------------------------------------------------|-----|
| Cow     | 1   | MSSAWVTSFEKARLWMYLQALGFEPCLATIACGNTVSHTQFGVNMFDKLNRFDAFHIVSYF | 60  |
| Giraffe | 1   | .....Y.....H.....T.....                                       | 60  |
| Okapi   | 1   | .....Y.....H.....                                             | 60  |
| Cow     | 61  | LFQTLDKSLTKEVFKHCWPPFDQKRDFEVRKLFCEWLKKISAECGSSFPQVVGSLFLFPV  | 120 |
| Giraffe | 61  | .....E.....C.....                                             | 120 |
| Okapi   | 61  | .....C.....                                                   | 120 |
| Cow     | 121 | GPKFIHIMYHFARFVAVKYIKTHSKNSSIRFTETFNVKPQDLHICLARCLVARNRFLQVL  | 180 |
| Giraffe | 121 | .....T.....                                                   | 180 |
| Okapi   | 121 | .....T.....                                                   | 180 |
| Cow     | 181 | QREDCVTRKYQENAQLSVKQVRNLRSECMGLENQIKKMEPCDDQSNIQEKIQKVRSLWTN  | 240 |
| Giraffe | 181 | .....T.....Q..M.....S                                         | 240 |
| Okapi   | 181 | .....T.....Q.....S                                            | 240 |
| Cow     | 241 | VNETLMFLEKEREVSSVLSLDNNYTLDGTDIAINIPSLLLDKIEKQMCQLHTGNIYEAG   | 300 |
| Giraffe | 241 | .....N.....I.....                                             | 300 |
| Okapi   | 241 | .....N.....I.....                                             | 300 |
| Cow     | 301 | KLNILTVPFWLLNEVLKVMKCECCQTDQARLTIDLHFLEKETRFQKERLSDLKHMRYKITE | 360 |
| Giraffe | 301 | .....Y.....R..G..R.....                                       | 360 |
| Okapi   | 301 | .....Y.....R..G..R.....                                       | 360 |
| Cow     | 361 | ALKTIRHSIVEKQEEWHKKWKEFLGLSPFSIIKGSTPAVDLLPPMSPLSFDPAEEAYAR   | 420 |
| Giraffe | 361 | D.....I.....S.....                                            | 420 |
| Okapi   | 361 | D.....I.....R.....                                            | 420 |
| Cow     | 421 | SILLQYPASLPVTPKQHIQENNCRRASDTLETKSDPPNSPASFPPLQVPVPLGGDIVTLE  | 480 |
| Giraffe | 421 | .....V.....A.....L.....S.....                                 | 480 |
| Okapi   | 421 | .....V.....A.....L.....S.....                                 | 480 |
| Cow     | 481 | KDTKLVTLREKNETVPKKTPEFNVENSSSNIVKNTDSSACGGSLPAKKSNPQKEQDHL    | 540 |
| Giraffe | 481 | .E..I.....K..D.....A.....A.....                               | 540 |
| Okapi   | 481 | .N..I.....T..Q..K..D.....A.....S.....                         | 540 |
| Cow     | 541 | VEEVARAVLSNSPQLSEEKVKLEELIDSLISNPFLTRSQIPRTPENLISEIRSSWRKAV   | 600 |
| Giraffe | 541 | .....G.....D.....                                             | 600 |
| Okapi   | 541 | .....G.....D.....                                             | 600 |
| Cow     | 601 | DTEDNRSTEPIQVDTERREELPESLPVHNQEFMSASFLSAATVSNSSHSHLPEEKVVS    | 660 |
| Giraffe | 601 | EI.....H.....D.....                                           | 660 |
| Okapi   | 601 | EI.....H.....D.....L..                                        | 660 |
| Cow     | 661 | DCLECVQKPVVTTTCIGEPPTQNPDDLKNDIICMQLDCTTLQNKLETSQIETFSPAV     | 720 |
| Giraffe | 661 | .....G.....R.....H.....                                       | 720 |
| Okapi   | 661 | .....N.....                                                   | 720 |
| Cow     | 721 | GNRRNVLSSEEDNIKISDQSKASYKDFSMYNSMLWNCFQVSSEISSFKDGFILHET      | 780 |
| Giraffe | 721 | .....E.....HK.....G.....                                      | 780 |
| Okapi   | 721 | .....E.....HK.....G.....                                      | 780 |
| Cow     | 781 | LPEVGHISLISPSSTEATFNLEPNSPMHSGIFTEDVVGEKQTTPESDFNLQATCSGYEAL  | 840 |
| Giraffe | 781 | .....SK.....R.....                                            | 840 |
| Okapi   | 781 | .....SK.....R.....R.....Q                                     | 840 |

|         |     |                                                              |     |
|---------|-----|--------------------------------------------------------------|-----|
| Cow     | 841 | KKSPSKQREEIYLSNPEILERHKPELSLTPQKMQTDDMLNFLGIHDLHIDYTKPSSRMSL | 900 |
| Giraffe | 841 | ...L.....H.....L.S.....N.....G.....S...                      | 900 |
| Okapi   | 841 | ...L.ER.....H.....L...F...N.....S.Y.                         | 900 |
|         |     |                                                              |     |
| Cow     | 901 | GERKRSLSPLIKFSPVEQLKTTIPCSLGELLSNLTEEEIILNKSLDAEVSPSDSTR     | 956 |
| Giraffe | 901 | .....N.....P.....L.S.....K.....L..                           | 956 |
| Okapi   | 901 | .....N.....P.....K.....L..                                   | 956 |

**Newick Tree of Mammalian HAUS6**

```

((human:0.0194397, (macaque:0.00812563, baboon:0.00662755):0.019272):0.0570848,
(((rhino:0.0623698, horse:0.0890501):0.0140823, ((cat:0.00924832, tiger:0.0194657):0.0663829,
((walrus:0.0260784, panda:0.0356352):0.017548, dog:0.0656536):0.0180032):0.0426137):0.00404989,
((camel:0.00742002, alpaca:0.0119366):0.0560334, (pig:0.0853386, ((minke_whale:0.0149833,
(baiji_dolphin:0.0186215, orca:0.0206927):0.00512539):0.034174, ((tibetan_antelope:0.0165858,
(goat:0.00656066, sheep:0.0054682):0.00551236):0.0137305, (yak:0.00210216,
cow:0.00209073):0.00634826, water_buffalo:0.0132339):0.0181573):0.00730959, (giraffe:0.0121769,
okapi:0.0121782):0.0157611):0.105023):0.0106529):0.00214122):0.0141138):0.0570848);

```

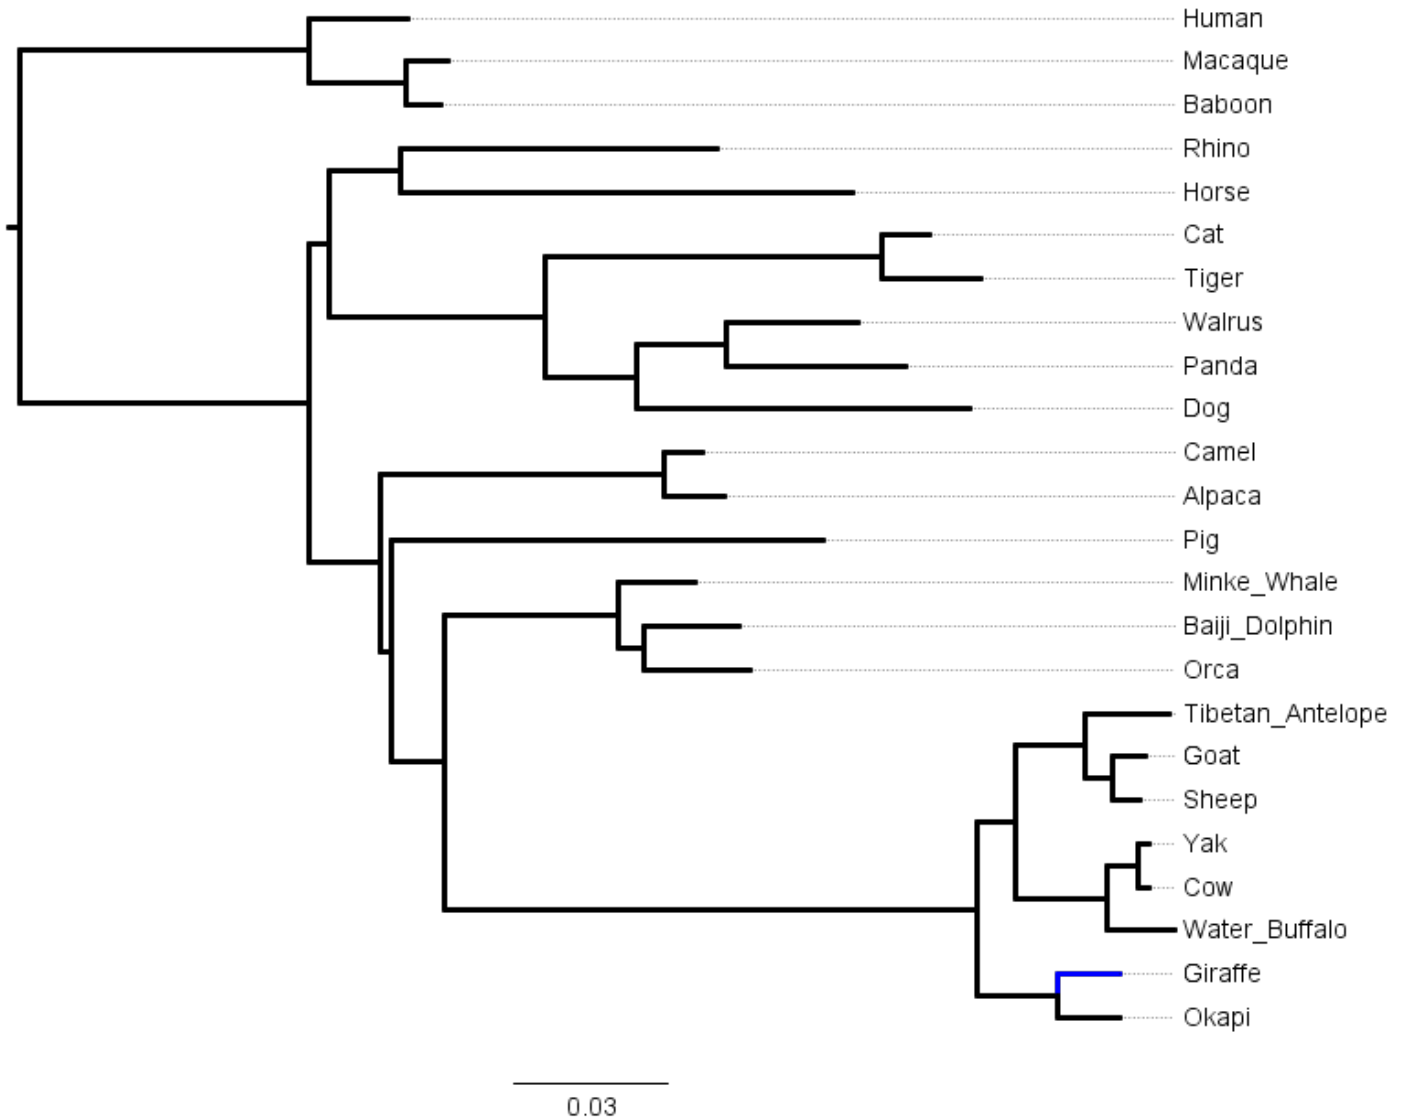

**Locus Name: HAUS Augmin-Like Complex, Subunit 6 (HAUS6)**



**Locus Name:** Rho GTPase Activating Protein 15 (**ARHGAP15A**)

ENSBTAT0000061453 ARHGAP15-201 Rho GTPase-activating protein trypanosome resistance  
mouse: reduced leukocyte numbers and abnormally shaped macrophage. Chemotactic responses of  
macrophage are normal while neutrophile chemoattraction and bacterial pagocytosis are increased.

PP2: (Giraffe) L14R, I177T

Giraffe: Q122P UIS, I177T UIS

**Protein sequence Alignment of Cow, Giraffe and Okapi ARHGAP15A**

|         |     |                                                                 |     |
|---------|-----|-----------------------------------------------------------------|-----|
| Cow     | 1   | MQKSTNSDIPVETLNPTRQGTGAVQMRIKNANSHHDRLSQSKSMILTEVGKVTEPISRHR    | 60  |
| Giraffe | 1   | .....T...R.....DA.....                                          | 60  |
| Okapi   | 1   | .....T.....D.....V....                                          | 60  |
|         |     |                                                                 |     |
| Cow     | 61  | RNHSQHILKDVIPPLEQLMVEKEGYLQKAKIADGGKLRKNWTTSWIVLSSRKIEFYKES     | 120 |
| Giraffe | 61  | .....V.....S.....N.....                                         | 120 |
| Okapi   | 61  | .....V.....S.....N.....                                         | 120 |
|         |     |                                                                 |     |
| Cow     | 121 | KQQALSNMKTGNKPESVDLCGAHIEWAKEKSSRKNVFQITTLSGNEFLLQSDIDFIILDW    | 180 |
| Giraffe | 121 | .P.....A.....T.E.                                               | 180 |
| Okapi   | 121 | .....A.....                                                     | 180 |
|         |     |                                                                 |     |
| Cow     | 181 | FHAIKNAIDRLPKDPSSHRSRNLELFKIQRSSSTELLSHYDSDTKEQKPEHRKSLMFRLLH   | 240 |
| Giraffe | 181 | .....V.....                                                     | 240 |
| Okapi   | 181 | .....I.....                                                     | 240 |
|         |     |                                                                 |     |
| Cow     | 241 | SASDTSKDNRVKSRLKKFITRRPSLKTLEKGLIKDQIFGSHLHTLCEREKSTVPRFVKQ     | 300 |
| Giraffe | 241 | .....N.....                                                     | 300 |
| Okapi   | 241 | .....N.....                                                     | 300 |
|         |     |                                                                 |     |
| Cow     | 301 | CIEAVEKRGLDVDGIYRVSGNLATIQLRFIVNQEEKLNLDDSQWEDIHVVTGALKMFFR     | 360 |
| Giraffe | 301 | .....                                                           | 360 |
| Okapi   | 301 | .....                                                           | 360 |
|         |     |                                                                 |     |
| Cow     | 361 | DLPEPLFPYSFFEQFVEAIAIKKQDNNTRIEAIAKSLVQKLPNPNRDTMKVLFGHLTKIVARA | 420 |
| Giraffe | 361 | .....S.....                                                     | 420 |
| Okapi   | 361 | .....S.....K.                                                   | 420 |
|         |     |                                                                 |     |
| Cow     | 421 | SKNLMSTHSLGIVFGPTLLRAEDESIGNMAVHMVYQNQIAELMLSAYDQIFS            | 471 |
| Giraffe | 421 | .Q.....Q.....T.....E..K...                                      | 471 |
| Okapi   | 421 | .Q.....Q.....N.T.....E..K...                                    | 471 |

**Newick Tree of Mammalian ARHGAP15A**

(bushbaby:0.0118693, ((human:0.0043642, rhesus:0.0062181):0.00859842, (((((giraffe:0.0147509, okapi:0.00450219):0.00839461, ((sheep:0.00200696, tibetan\_antelope:0.00868854):0.00515523, cow:0.0153501):0.00557623):0.0198966, camel:0.0205926):0.000958678, (sperm\_whale:0.00458877, (orca:0.00240179, baiji\_dolphin:0.00605502):0.00176742):0.0115323):0.00185767, ((horse:0.0126713, rhino:0.0129193):0.00529789, (polecat:0.0170393, ((walrus:0.00708325, panda:0.0120471):0.00103587, (dog:0.0102075, (cat:0, tiger:0.0042562):0.00681543):0.00219187):0.00279409):0.0124646):0.00276319):0.00361606):0.0118693);

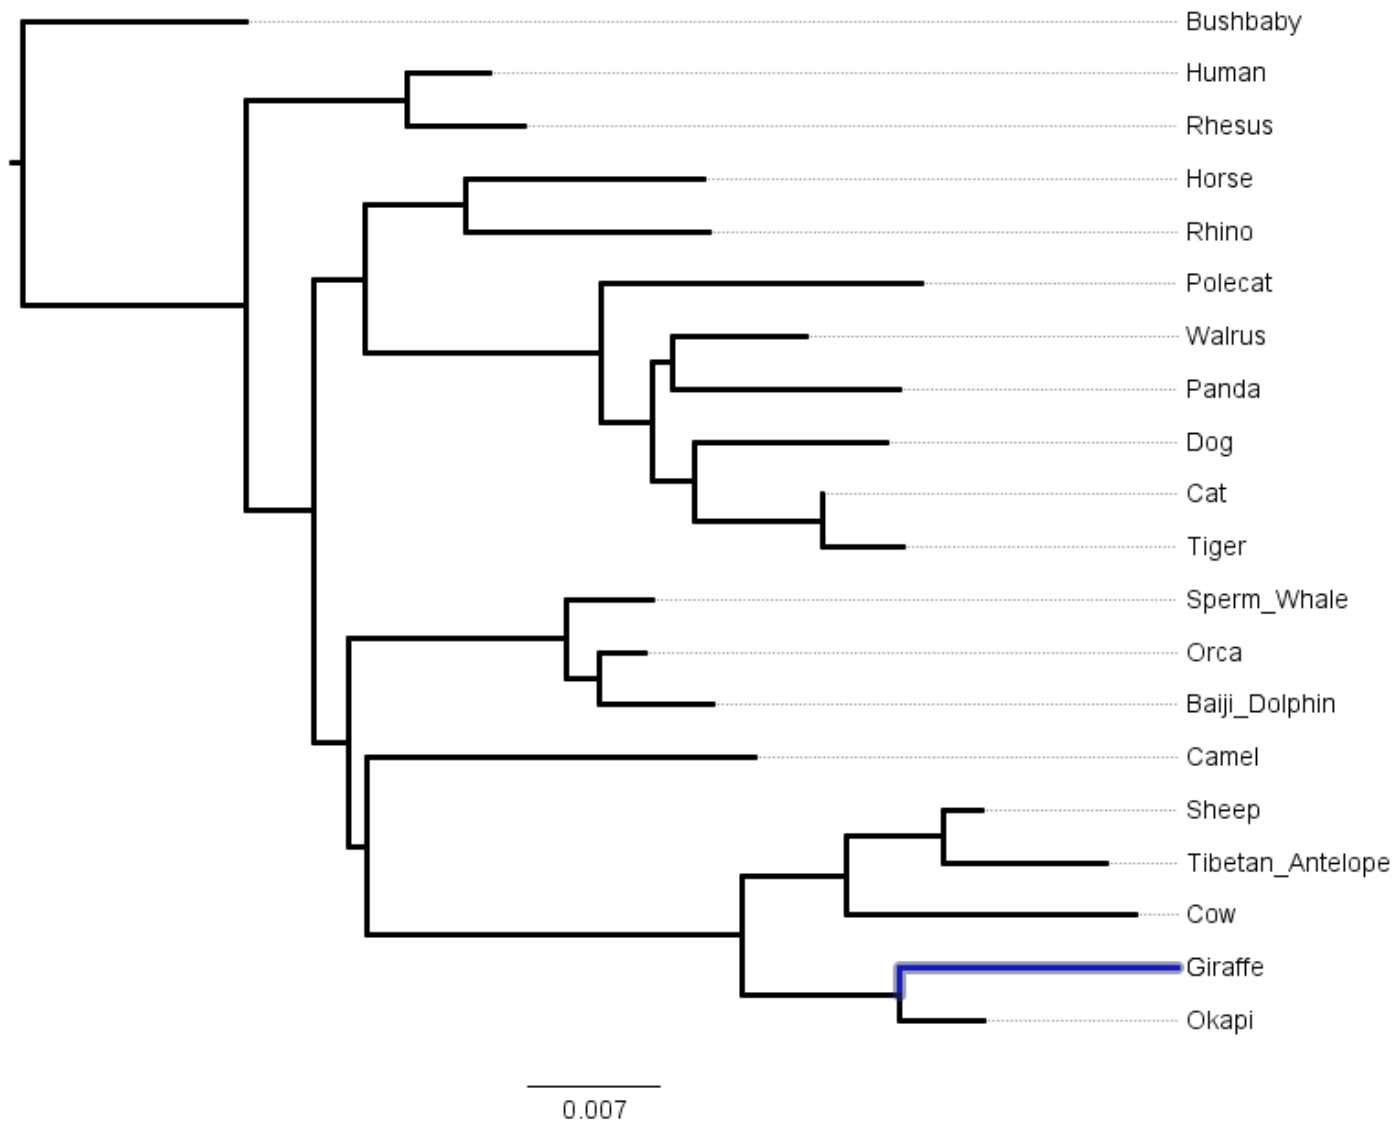

**Locus Name:** Rho GTPase Activating Protein 15 (**ARHGAP15A**)

**Locus Name: Lactoperoxidase (LPO)**

ENSBTAT00000016986 LPO-201 lactoperoxidase antibacterial in milk  
 GWAS study in cattle maps susceptibility to bronchial respiratory disease

PP2: (Giraffe) A155T, T179S, Y289C, A373V, G651W, H675Y; (Giraffe/Okapi) S302P, E355V

Giraffe: V14M UPS, S118F UIS, G651W UIS, H675Y UPS  
 Giraffe/Okapi: S302P UIS, E355V UIS, L367V UPS

**Protein sequence Alignment of Cow, Giraffe and Okapi LPO**

|         |     |                                                               |     |
|---------|-----|---------------------------------------------------------------|-----|
| Cow     | 1   | MWVCLQLPVFLASVTLFEVAASDTIAQAASSTTTISDAVSKVKIQVNKAFLDSRTRLKTTL | 60  |
| Giraffe | 1   | .....H.....M.....N...T.....                                   | 60  |
| Okapi   | 1   | .....H.....N...T.....                                         | 60  |
| Cow     | 61  | SSEAPTQQLSEYFKHAKGRTRTAIRNGQVWEESLKRRLRRDRTLNTVTDPSLDLTALSWE  | 120 |
| Giraffe | 61  | .....R.....Q.....F..                                          | 120 |
| Okapi   | 61  | .....R.....Q.....F...L.....                                   | 120 |
| Cow     | 121 | VGCGAPVPLVKCDENSPYRTITGDCNNRRSPALGAANRALARWLP AEYEDGLALPFGWTQ | 180 |
| Giraffe | 121 | .....T.....S.....S.                                           | 180 |
| Okapi   | 121 | .....S.....S.....                                             | 180 |
| Cow     | 181 | RKTRNGFRVPLAREVSNKIVGYLDEEGVLDQNRSLLFMQWQIVDHDLDFA PETELGSNE  | 240 |
| Giraffe | 181 | .....N.....V.....S.                                           | 240 |
| Okapi   | 181 | .....N.....V.....S.                                           | 240 |
| Cow     | 241 | HSKTQCEEYCIQGDNCFPIMFPKNDPKLKTQKCMPPFRAGFVCPTPPYQSLAREQINAV   | 300 |
| Giraffe | 241 | ...A...H.....C.....                                           | 300 |
| Okapi   | 241 | ...A...H.....T.....                                           | 300 |
| Cow     | 301 | TSFLDASLVYGSEPSLASRLRNLSSPLGLMAVNQEAWDHGLAYLPFNKKPSPCEFINTT   | 360 |
| Giraffe | 301 | .P.....D.....V.....                                           | 360 |
| Okapi   | 301 | .P.....D.....V.....                                           | 360 |
| Cow     | 361 | ARVPCFLAGDFRASEQIILLATAHTLLLREHNRLARELKKLNPHWNGEKLYQEARKILGAF | 420 |
| Giraffe | 361 | .Q...V...S.V.....AS.....K.....D.....                          | 420 |
| Okapi   | 361 | .Q...V...S.V.....S.....K.....D.....                           | 420 |
| Cow     | 421 | IQIITFRDYLPVILGSEMOKWIPPYQGYNNSVDPRI SNVFTFAFRFGHMEVPSTVSRLDE | 480 |
| Giraffe | 421 | .....L.....                                                   | 480 |
| Okapi   | 421 | .....L.....                                                   | 480 |
| Cow     | 481 | NYQPWGPEAELPLHTLFFNTWRIKDGIDPLVRGLLAKKSKLMNQDKMVTSELRNKLFQ    | 540 |
| Giraffe | 481 | .....E.....LY.....                                            | 540 |
| Okapi   | 481 | .....E.....LY.....                                            | 540 |
| Cow     | 541 | PTHKIHGFDLAAINLQRCRDHGMPPGYNSWRGFCGLSQPKTLKGLQTVLKNKILAKKLMDL | 600 |
| Giraffe | 541 | .....A.....L..                                                | 600 |
| Okapi   | 541 | .....A.....L..                                                | 600 |
| Cow     | 601 | YKTPDNIDIWIGGNAEPMVERGRVGPLLACL LGRQFQQIRDGDRFWWENPGVFTEKQRDS | 660 |
| Giraffe | 601 | .....A.....I.....W.....                                       | 660 |
| Okapi   | 601 | .....A.....S...I...L.R.....                                   | 660 |
| Cow     | 661 | LQKVSFSRLICDNTHITKVP LHAFAQANNYPHDFVDCSTVDKLDLSPWASREN        | 713 |
| Giraffe | 661 | .....V...Y.....G....AI.....                                   | 713 |
| Okapi   | 661 | .....V.....V.....G....AI.....                                 | 713 |

**Newick Tree of Mammalian LPO**

(aardvark:0.0501076, (((((crab\_eating\_macaque:0, baboon:0.00289749):0.00857466, human:0.00988003):0.00028666, orangutan:0.0096434):0.0465617, (lemur:0.0860017, naked\_mole\_rat:0.0947617):0.00580509):0.00668931, (black\_flying\_fox:0.0723435, (horse:0.0378994, rhino:0.0442298):0.0218112, (panda:0.0339126, walrus:0.0203033, Weddell\_seal:0.0227582):0.0181913):0.00301572, dog:0.0646278):0.0260308):0.00307433):0.00465552, (camel:0.00280621, dromedary\_camel:0.00850957):0.0698379, (((minke\_whale:0.0194947, (bottle\_nose\_dolphin:0.00185447, orca:0.00236792):0.0107734, baiji\_dolphin:0.0134454):0.0115035):0.00532388, sperm\_whale:0.0334334):0.0374344,

((giraffe:0.0118233, okapi:0.00944058):0.0211749, (((sheep:0.00660276, goat:0.0146914):0.00438947, tibetan\_antelope:0.0112999):0.00949666, (cow:0.0051338, water\_buffalo:0.0104369):0.0122571):0.0126386):0.05275):0.00898427):0.0147262):0.00703359):0.0501076);

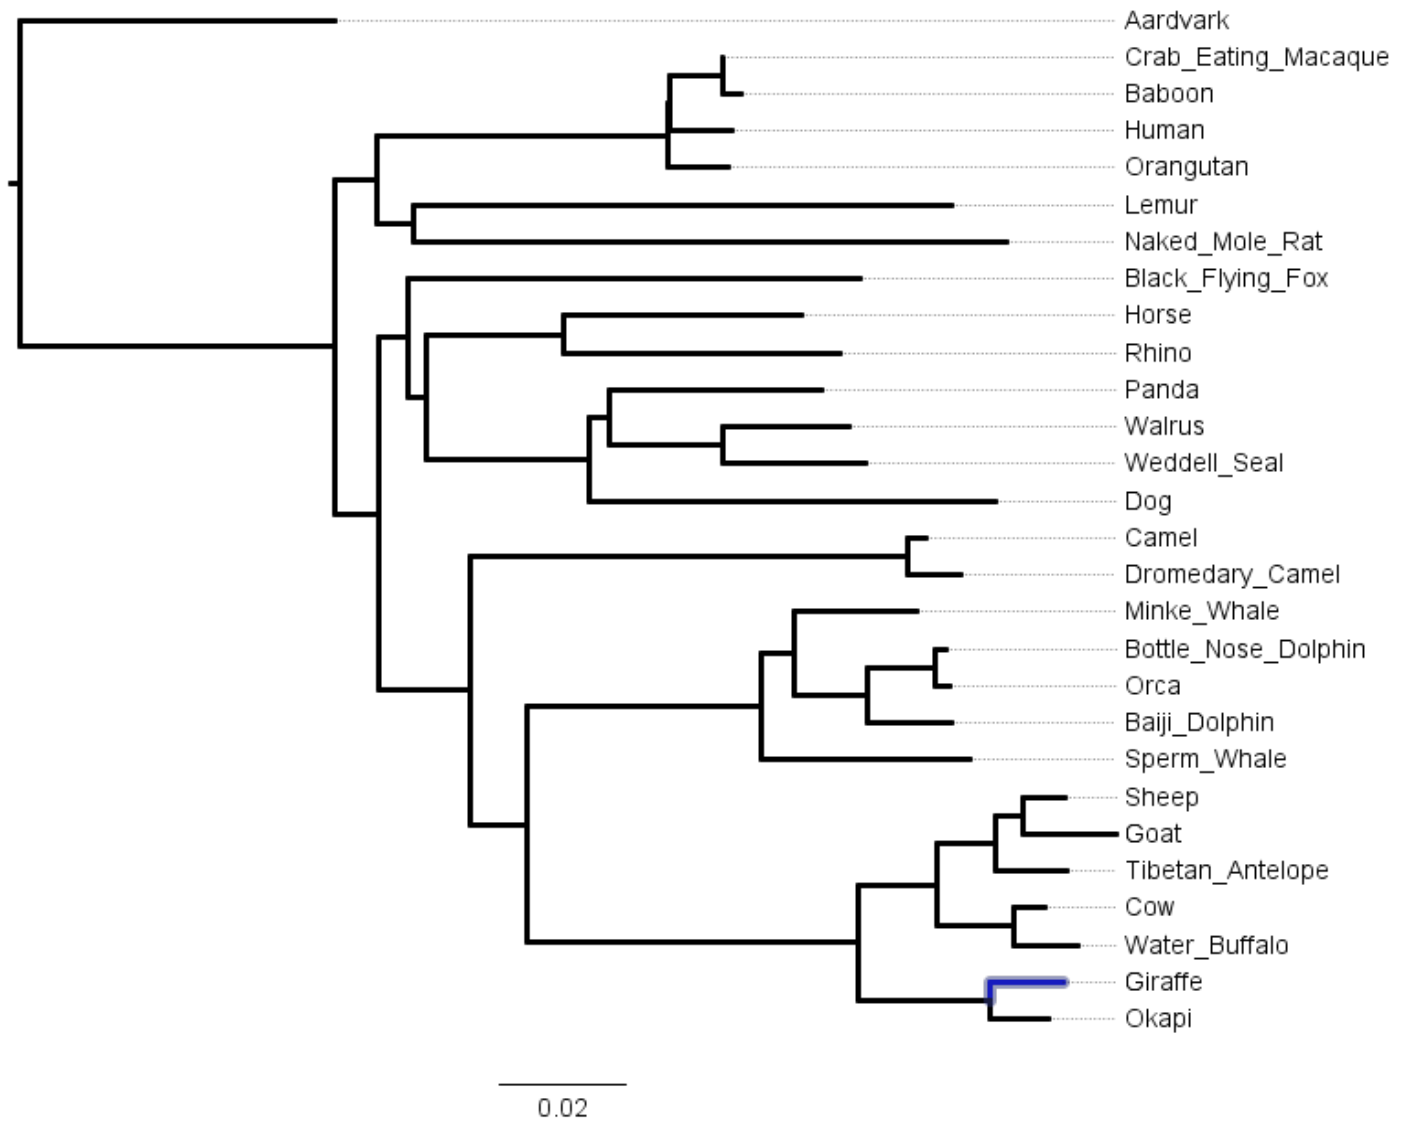

**Locus Name: Lactoperoxidase (LPO)**

**Locus Name: Semaphorin 7A (SEMA7A)**

ENSBTAT0000015210 SEMA7A-201 semaphorin 7A cell migration, adhesion, immune response  
mouse: impaired development of olfactory tract

PSG: (Giraffe) R107H|CGC/CAC  
PP2: All benign

Giraffe: T428A UIS, TL656-657RV UISs  
Giraffe/Okapi: R24W UPS, V95A UPS, W300R UIS, Q423H UIS

**Protein sequence Alignment of Cow, Giraffe and Okapi SEMA7A**

|         |     |                                                                 |     |
|---------|-----|-----------------------------------------------------------------|-----|
| Cow     | 1   | MTPPPSRCTALGAPRARVSSSLARSFPLWLLQLVWTAASQGHSKSGPRISAVWKGRA       | 60  |
| Giraffe | 1   | .....P..W.G...R.....P.....H.                                    | 60  |
| Okapi   | 1   | .....P..W.G...R.....P.....T.H.                                  | 60  |
| Cow     | 61  | GQDHVDFGSTEPHTVLFHEPGSSSVWVGGRNRIYVFAFSKGRNASVRTVNI GSTKGS CRD  | 120 |
| Giraffe | 61  | .....S.V.A.D.....MH.....                                        | 120 |
| Okapi   | 61  | .....S..Q.....S.V.A.D.....M.....                                | 120 |
| Cow     | 121 | KQDCGNYITLLEKQNEGLLACGTNARRPSCWILVND SVEFLGERKGYAPFSPDENS L VLF | 180 |
| Giraffe | 121 | ...E.....AV.....                                                | 180 |
| Okapi   | 121 | ...E.....AV.....                                                | 180 |
| Cow     | 181 | DGDEVYSTIRKQEYNGKIPRFRIKGEIELYTS DTVMQNPQFIKATIVHQDQAYDDKIYY    | 240 |
| Giraffe | 181 | .....                                                           | 240 |
| Okapi   | 181 | .....                                                           | 240 |
| Cow     | 241 | FFREDNPDKNPEAPLNVS RVAQLCRGDQGGESSLSVSKWNTFLKAMLVCS DATTNKNFNR  | 300 |
| Giraffe | 241 | .....A.....W                                                    | 300 |
| Okapi   | 241 | .....A.....W                                                    | 300 |
| Cow     | 301 | LQDVFLLPDPNGQWKDTRVYGVFSNPWNYS AVCVYSLGDIDKVFCTSSLKGYHSSLPNPR   | 360 |
| Giraffe | 301 | .....                                                           | 360 |
| Okapi   | 301 | .....                                                           | 360 |
| Cow     | 361 | PGKCLPDRQPIPTETFQVADSHPEVVQRVEPMGPLKAPLFH SKYHYQKVVVHRMHASNGE   | 420 |
| Giraffe | 361 | .....T.....                                                     | 420 |
| Okapi   | 361 | .....T.....                                                     | 420 |
| Cow     | 421 | TFHVLYLTDTDKGTIHKVLEPGWEHGLVFNILEIQPFRRAAAIQAMSLDADRRKLYVNSQ    | 480 |
| Giraffe | 421 | .....A.....V...KR.....                                          | 480 |
| Okapi   | 421 | .....V...R.....                                                 | 480 |
| Cow     | 481 | WEVSQVPLDLCELYTGGCHGCLMARDPYCGWYQDR CVSIYSSQEPVLQSI SPVDPHKGCP  | 540 |
| Giraffe | 481 | .....V.....H.....N..E.....                                      | 540 |
| Okapi   | 481 | .....V.....H.....N..E.....                                      | 540 |
| Cow     | 541 | NPKPEQAPLQKVS LAQNSRYLSCPME SRHATYSWRHENSVEQSCEPGHQSPNCILFIEN   | 600 |
| Giraffe | 541 | .....                                                           | 600 |
| Okapi   | 541 | .....                                                           | 600 |
| Cow     | 601 | LTDLHYGHYYCEAQEDSYLREAQHWELLREDSAMTS QLLGHACTLATS L WLGVLPTLILG | 660 |
| Giraffe | 601 | .....G.....R.....R.....RV...                                    | 660 |
| Okapi   | 601 | .....G..F.....R.....                                            | 660 |
| Cow     | 661 | LLVH                                                            | 664 |
| Giraffe | 661 | ....                                                            | 664 |
| Okapi   | 661 | ....                                                            | 664 |

**Newick Tree of Mammalian SEMA7A**

(Brandt\_s\_bat:0.0374918, (((((macaque:0.000115098, baboon:0.0029015):0.00606498, human:0.0106665):0.051877, aardvark:0.0746724):0.00991221, (walrus:0.0086756, Weddell\_seal:0.00652284):0.0350117):0.00327992, ((horse:0.0270289, rhino:0.0400769):0.0157669, ((baiji\_dolphin:0.00469115, (bottle\_nose\_dolphin:0.00324284, orca:0.00584826):0.00290453):0.00779418, (minke\_whale:0.0120336, sperm\_whale:0.0139448):0.00222698):0.0252228, (cow:0.0282195, (giraffe:0.00857852, okapi:0.00659686):0.0104437):0.033028):0.0393207):0.000607242):0.0374918);

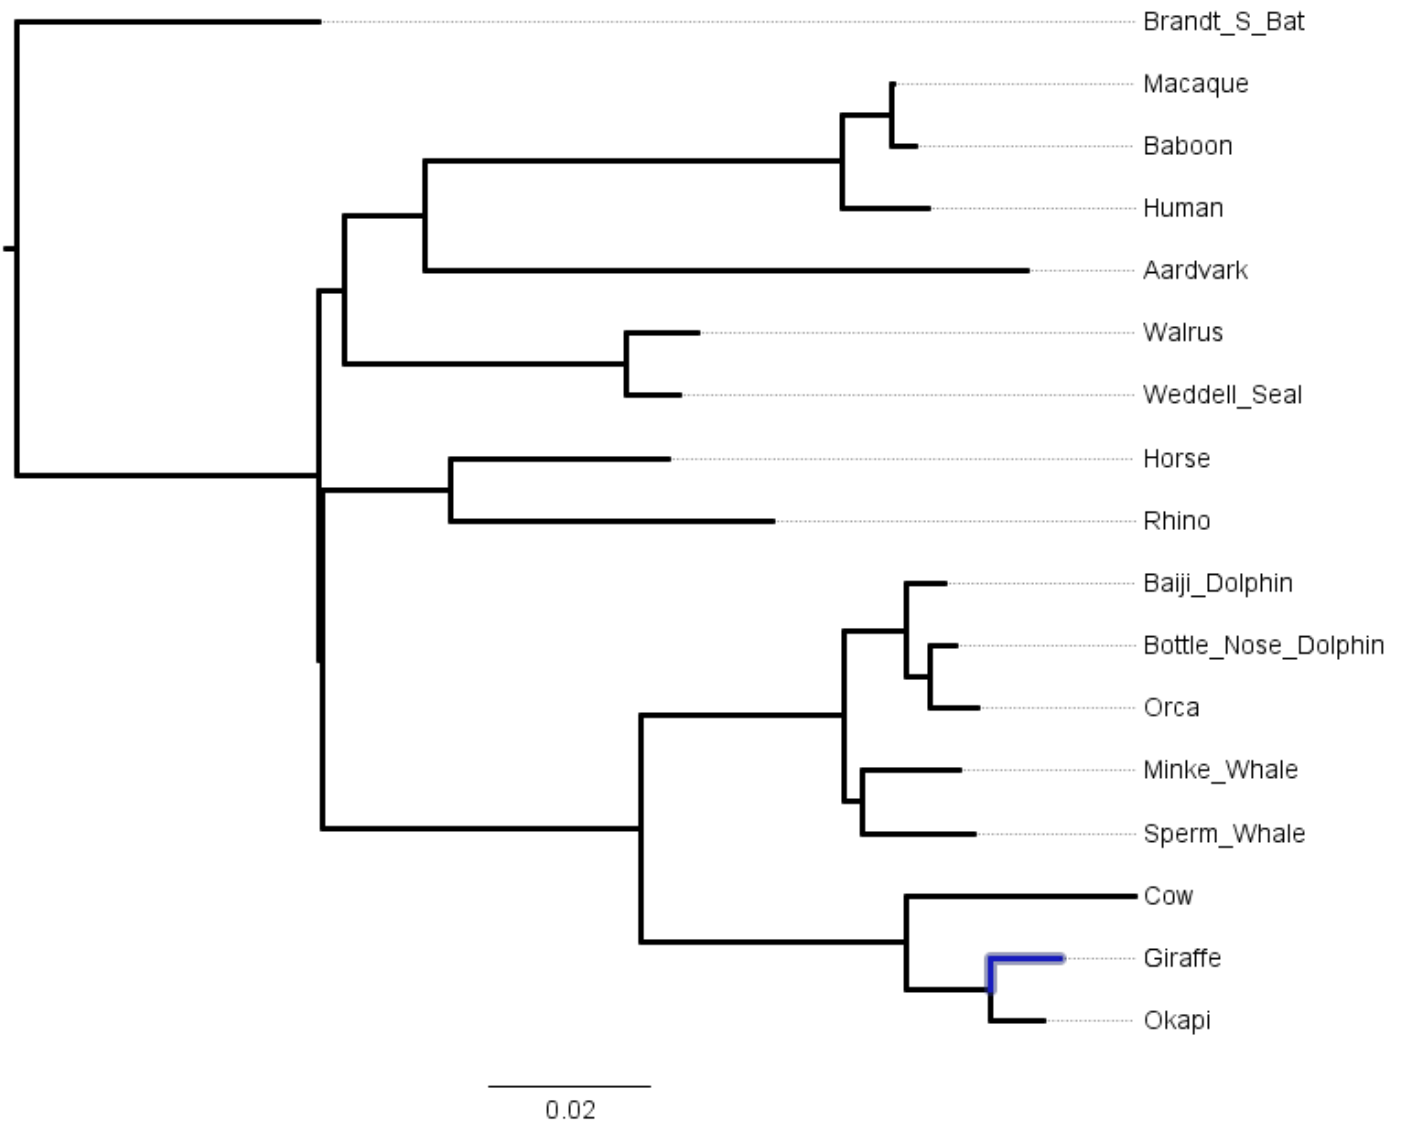

**Locus Name: Semaphorin 7A (SEMA7A)**

**Locus Name: V-Rel Avian Reticuloendotheliosis Viral Oncogene Homolog (REL)**

ENSBTAT00000020447 REL-201 v-rel oncogene lymphocyte and ketatinocytes growth and development  
 mouse: defects in lymphocyte proliferation, humoral immunity, cytokine production

PSG: Q305E

PP2: Q574P

Giraffe: L163F UIS, A291T UIS, Q301Y UPS, Q305E UIS, P319S UPS, H390P UPS, S472N UIS, Q574P UIS

**Protein sequence Alignment of Cow, Giraffe and Okapi REL**

|         |     |                                                               |     |
|---------|-----|---------------------------------------------------------------|-----|
| Cow     | 1   | MASGGFNPCIEIIEQPRQRGMRFYKCEGRSAGSIPGEHSTDNNRITYPSIQILNYYGK GK | 60  |
| Giraffe | 1   | .....                                                         | 60  |
| Okapi   | 1   | .....                                                         | 60  |
| Cow     | 61  | VRITLVTKNDPYKPHPHDLVKGKDCRDGYEAEFGQERRPLFFQNLGIRCVKKKEVKDAVI  | 120 |
| Giraffe | 61  | .....E.I.                                                     | 120 |
| Okapi   | 61  | .....E.I.                                                     | 120 |
| Cow     | 121 | SRVRAGINPFNVPEQQLLDIEDCDLNVVRLCFQVFLPDEHGNTTALPPVVSNIYDNRA    | 180 |
| Giraffe | 121 | ..I.....F..T.....                                             | 180 |
| Okapi   | 121 | ..I.....T.....                                                | 180 |
| Cow     | 181 | PNTAELRICRVNKNCGSVKGGDEIFLLCDKVQKDDIEVRFVLDWEAKGVFSQADVHRQV   | 240 |
| Giraffe | 181 | .....E.....                                                   | 240 |
| Okapi   | 181 | .....E.....                                                   | 240 |
| Cow     | 241 | AIVFKTPPYCKAIIIEPVTVMQLRRPSDQEVSESMDFRYLPDEKDTYGNKAKKQKTLLF   | 300 |
| Giraffe | 241 | .....T.....T.....                                             | 300 |
| Okapi   | 241 | .....T.....                                                   | 300 |
| Cow     | 301 | HKLWQDCGVNFPERPRPSPLGPTGEGRFIKKEPNLFSHGAVLPETSRPVSSQAESYSSS   | 360 |
| Giraffe | 301 | Y...E.....S.....                                              | 360 |
| Okapi   | 301 | Q.....                                                        | 360 |
| Cow     | 361 | ASISSTLSHPASAMLPMTQSSSGWSSVAHPTSRVNTNSLSSFSTGTLSSNSQVIPPFL    | 420 |
| Giraffe | 361 | .....P...H.....G.....S..                                      | 420 |
| Okapi   | 361 | .....I.....I.....G.....                                       | 420 |
| Cow     | 421 | EMSDLNVSNACIYNNNTNDIGRMEASSVSPADLYSISDASMLPNCVNMITPSNDSMRETD  | 480 |
| Giraffe | 421 | .....A.....G.....N.....                                       | 480 |
| Okapi   | 421 | .....A.....G.....                                             | 480 |
| Cow     | 481 | NPRLVSMNLENPSCNSVLDPRDLRQLHQMSPPSMSTVTSSTTAYVAQSEAFEGSDFNCA   | 540 |
| Giraffe | 481 | .....S.....S.....F.....                                       | 540 |
| Okapi   | 481 | .....S.....S.....F.....                                       | 540 |
| Cow     | 541 | DNSMINEAGPSNSTNANSHGFGPNSQYSGIGAMQNEQLSDSF AF E F F K V       | 589 |
| Giraffe | 541 | .....G.....S..Q.....P.....P....Q.                             | 589 |
| Okapi   | 541 | .....G.....S..Q.....P....Q.                                   | 589 |

Newick Tree of Mammalian REL

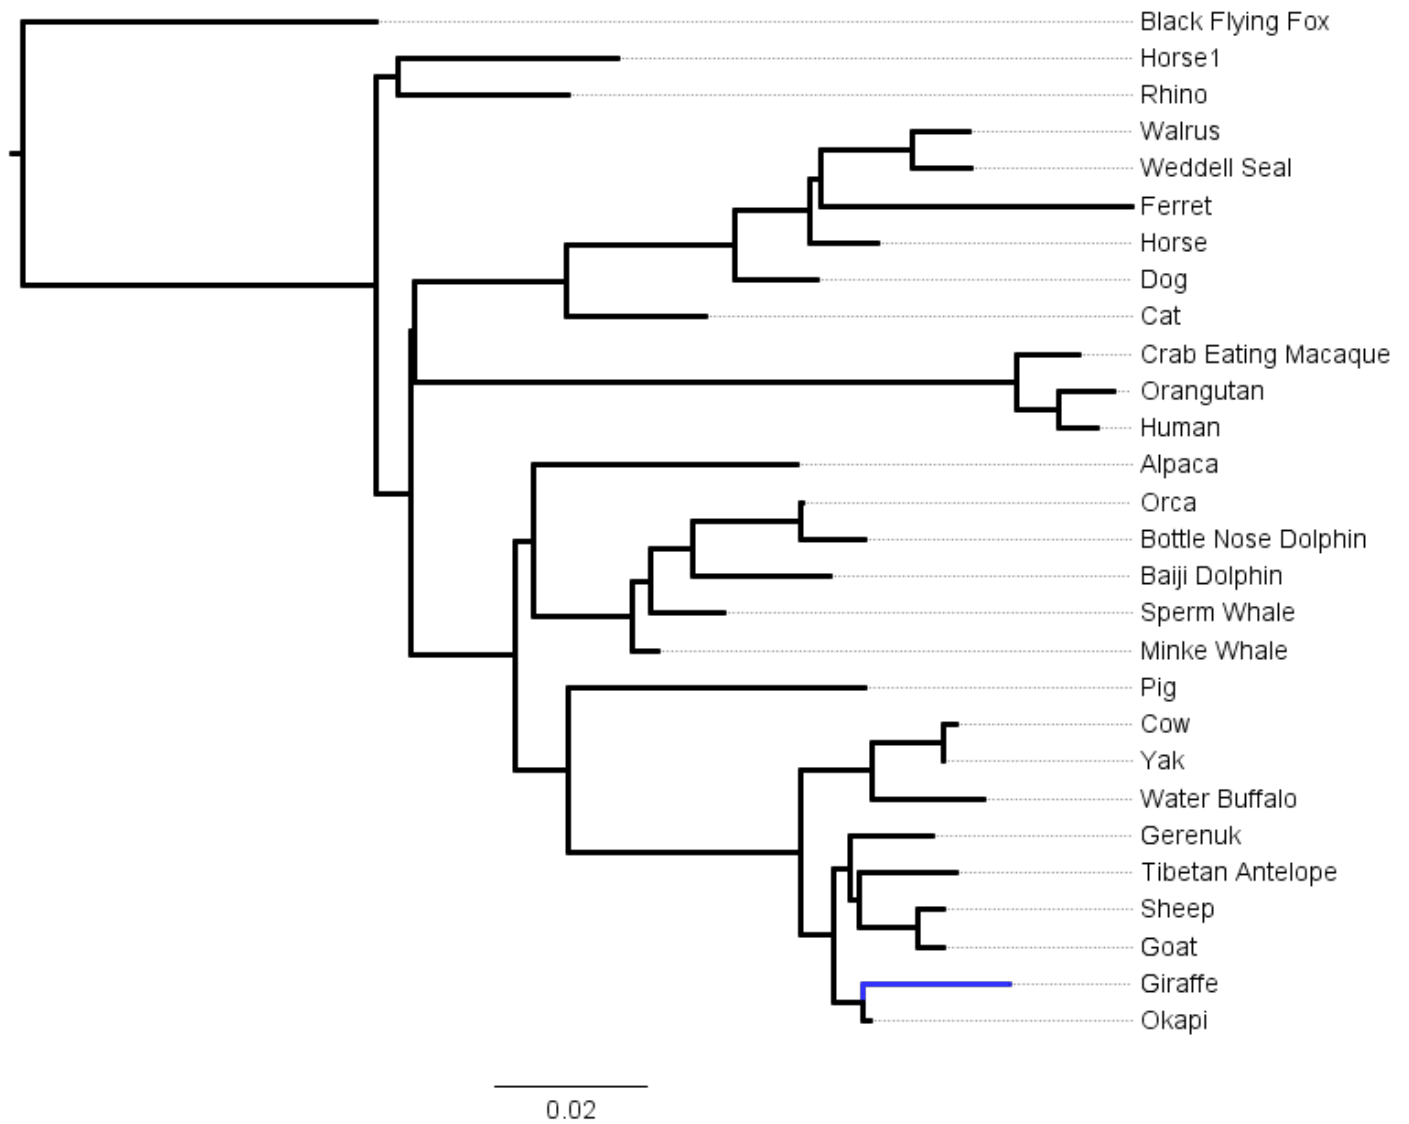

**Locus Name: V-Rel Avian Reticuloendotheliosis Viral Oncogene Homolog (REL)**



**Axis inhibition protein 1 (AXIN2)**

ENSBTAT0000042542 AXIN2-201 negative regulator of Wnt signaling embryonic somitogenesis and skeletal development

mouse: premature fusion of cranial sutures, enhanced expansion of osteoprogenitors, accelerated ossification, increased osteoblast proliferation and differentiation

Confirmed 5aa del in MA1, Reticulated and Rothschild

PP2: (Giraffe/Okapi) K486P, F679C

Giraffe: VPRLP 7-11 deletion UIS, Q165H UIS, S428C UIS, P489A UIS, A645P UPS

Giraffe/Okapi: I302M UIS, M312L UIS, M605V UPS

**Protein sequence Alignment of Cow, Giraffe and Okapi AXIN2**

|         |     |                                                                 |     |
|---------|-----|-----------------------------------------------------------------|-----|
| Cow     | 1   | MSSAVLVPRLPDPSSSFREDAPRPPVPGEEGETPPCQPGVVGKGPAAKASPVSPSARRNEG   | 60  |
| Giraffe | 1   | .....-----.....P.....P...S.....                                 | 55  |
| Okapi   | 1   | .....L.....P...S.....                                           | 60  |
| Cow     | 61  | GLGEPEGRASPDSPLTRWTKSLHSLLDGDGAYLFRFTFLEREKCVDTLDFWFACNGFRQM    | 120 |
| Giraffe | 56  | .....                                                           | 115 |
| Okapi   | 61  | .....                                                           | 120 |
| Cow     | 121 | NLKDAKTLRVAKAIYKRYIENNSIVSKQLKPKATKTYIRDSIKKQQIDSVMFDQAQTEVQA   | 180 |
| Giraffe | 116 | .....H.....                                                     | 175 |
| Okapi   | 121 | .....                                                           | 180 |
| Cow     | 181 | VMEENAYQTFLTSDICLQYVGSNGENPAYLSQGGLGSLRLVCGYLPTLNEEEEWTCADEFK   | 240 |
| Giraffe | 176 | .....M.....Y.E..R.....V.H.....                                  | 235 |
| Okapi   | 181 | .....M.....Y.E..R.....V.H.....                                  | 240 |
| Cow     | 241 | CKLPPTVVGSLSSKTLRATASARAMDTIESGYRSFRRSDPVNPHYVHVGSGYVFAPAASANDS | 300 |
| Giraffe | 236 | .....T.....                                                     | 295 |
| Okapi   | 241 | .....T.....                                                     | 300 |
| Cow     | 301 | EISSDALTDSSMSMTDSSVDGVPYRVSQKQLQREMHRSVKANGQVSLPHFPTRHRLPK      | 360 |
| Giraffe | 296 | .M.....L.....                                                   | 355 |
| Okapi   | 301 | .M.....L.....                                                   | 360 |
| Cow     | 361 | EMTPVEPAAFAAELIARLEKLETRHSLEERLQQIQEEDKEGVELAPGSREAGPAP         | 420 |
| Giraffe | 356 | .....T.....R.....S.....                                         | 415 |
| Okapi   | 361 | .....T.....R.....S.....V.....                                   | 420 |
| Cow     | 421 | HALCLLPSSSYEEDPQTILDDHLSRVLKTPGCQSPGVGRYSRARS PDHHRHHLQSHRA     | 480 |
| Giraffe | 416 | .P.....C.....A...                                               | 475 |
| Okapi   | 421 | .P.....A...                                                     | 480 |
| Cow     | 481 | LPPPGGPLEPAVAVPASCSSLGARGFVSRQATKHIHHHYIHHHAGPRTRDEAEAEAPRAR    | 540 |
| Giraffe | 476 | .....APA.I.....T...V.....E.....                                 | 535 |
| Okapi   | 481 | .....SPA.L.....T...V.....E.....                                 | 540 |
| Cow     | 541 | CPCVPVGGADYSCCAKCKSHPGVPEPPGAAQLGWTRSSVPTSSRGGAPARRSTAPAREAG    | 600 |
| Giraffe | 536 | .....A.....LG.....T...A.....                                    | 604 |
| Okapi   | 541 | .....A.....XG.....A.....                                        | 608 |
| Cow     | 601 | APGGMGSLQPPGEEGDRTPVWVQWVLESERPGKPKPHSAQSTKRAYPTESARTSPAERAG    | 660 |
| Giraffe | 605 | ...V.....A.....T.....P.....A.....                               | 664 |
| Okapi   | 609 | P...V.....A.....T.....A.....                                    | 668 |
| Cow     | 661 | RHHLWGGSTGHPRAVPRAHPACTQDSSVPLTPPNTLAQLEEACRRLAEVSKPPKQRCCA     | 720 |
| Giraffe | 665 | .....T.....A...A.....                                           | 724 |
| Okapi   | 669 | .....T.....A...A.....                                           | 728 |
| Cow     | 721 | AGQQRDRSHPGMPGTPFSSPSPASEDHKEPKKLAGMHALQASELVVTTYFFCGEEIPY      | 780 |
| Giraffe | 725 | .....AL.Q...A.....V.....                                        | 784 |
| Okapi   | 729 | .....AL.Q...A.....V.....                                        | 788 |

|         |     |                                                              |     |
|---------|-----|--------------------------------------------------------------|-----|
| Cow     | 781 | RRMLKAQSLTLGHFKEQLSKKGNRYRYFKKASDEFACGAVFEEVWDDEVVLPMEYGRILG | 840 |
| Giraffe | 785 | .....                                                        | 844 |
| Okapi   | 789 | .....                                                        | 848 |
|         |     |                                                              |     |
| Cow     | 841 | KVERID                                                       | 846 |
| Giraffe | 845 | .....                                                        | 850 |
| Okapi   | 849 | .....                                                        | 854 |

**Newick Tree of Mammalian AXIN2**

```
((rhino:0.0231316, (((((orangutan:0.000135022, human:0.00581387):0.00350805, (baboon:0.00373345, green_monkey:0.00460499):0.0042932):0.0142304, lemur:0.0253743):0.0111668, (rat:0.0145529, mouse:0.0132807):0.0515446):0.00502125, (manatee:0.0308067, aardvark:0.0344936):0.0191671):0.00514728):0.00296164, ((ferret:0.0200918, (wlarus:0.00611816, Weddell_seal:0.015519):0.0153809):0.00212345, dog:0.0129166):0.00523803, cat:0.0216697):0.0107635):0.03006, ((baiji_dolphin:0.0181628, orca:0.00697578):0.0354123, ((cow:0.0115613, water_buffalo:0.00994656):0.0216675, (giraffe:0.00736486, okapi:0.00449796):0.0127801):0.0493753):0.03006);
```

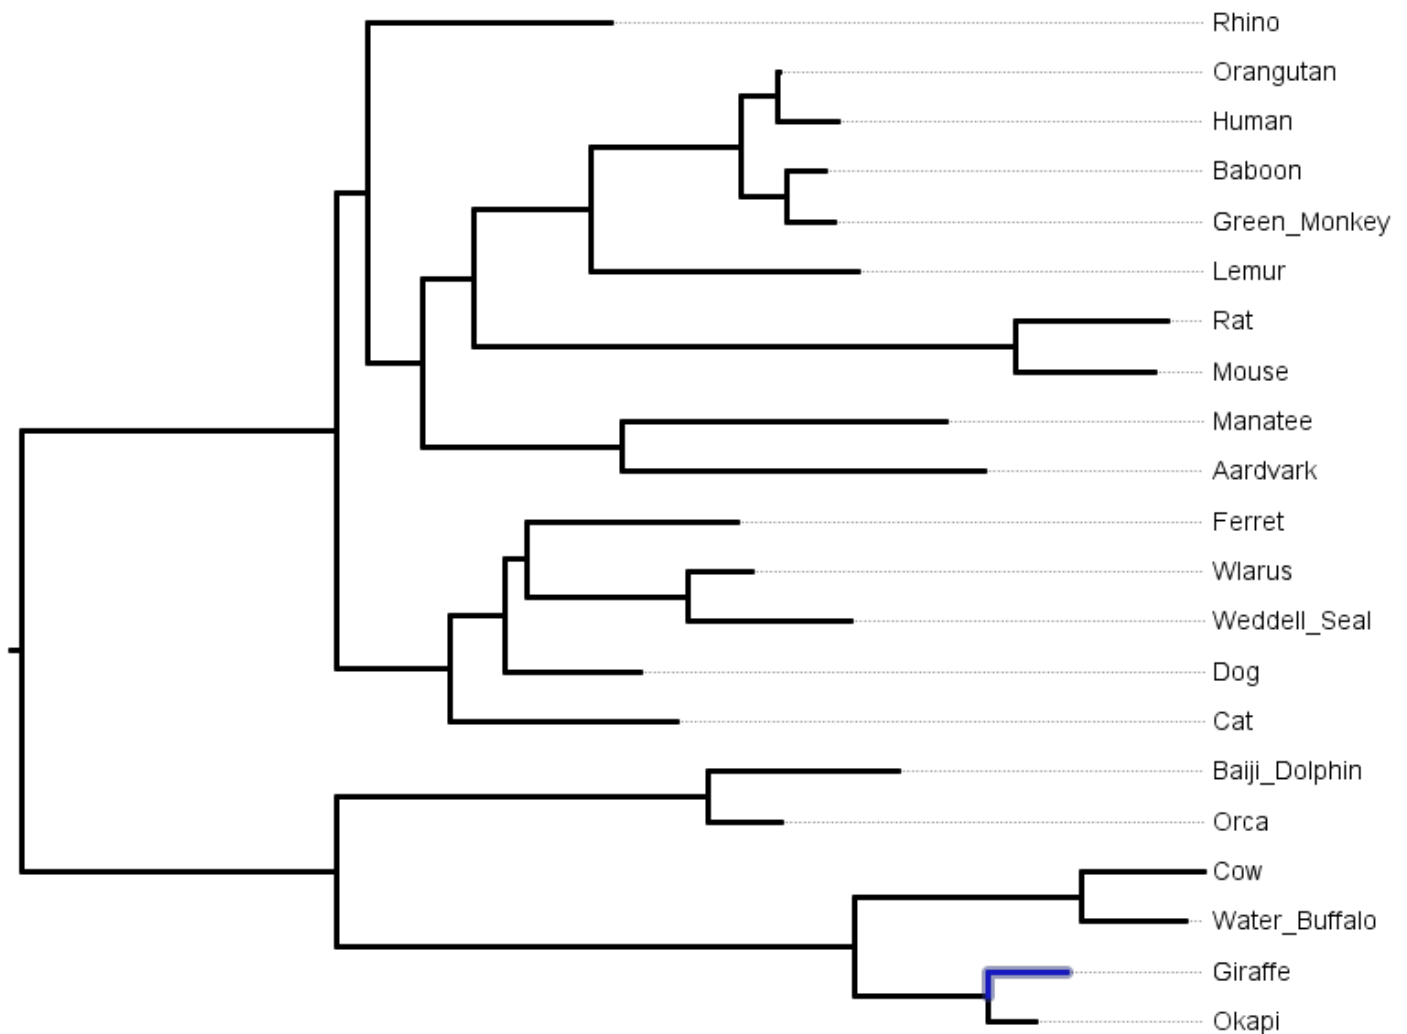

0.02

**Axis inhibition protein 1 (AXIN2)**

**Locus Name: Peripherin PRPH2**

ENSBTAT0000007836 PRPH2-201 perpherin-2 visual function  
m common cause of retinitis pigmentosa, human: retinal degeneration

PSG: P10Q

Giraffe: P10Q UIS

**Protein sequence Alignment of Cow, Giraffe and Okapi PRPH2**

|         |     |                                                               |     |
|---------|-----|---------------------------------------------------------------|-----|
| Cow     | 1   | MALLKVKFDQKKRVKLAQGLWLMNWFSVLAGIIIFGLGLFLKIELRKRSDVMNNSSESHFV | 60  |
| Giraffe | 1   | .....P.....E.....                                             | 60  |
| Okapi   | 1   | .....E.....                                                   | 60  |
|         |     |                                                               |     |
| Cow     | 61  | PNSLIGVGVLSVFNLSLAKGKICYDALDPAKYAKWKPWLKPYLAVCVLNFVFLVALCCF   | 120 |
| Giraffe | 61  | .....T.....                                                   | 120 |
| Okapi   | 61  | .....M.....T.....                                             | 120 |
|         |     |                                                               |     |
| Cow     | 121 | LLRGSLESTLAHGLKNGMKFYRDTDTPGRCFMKKTIDMLQIEFKCCGNGFRDWFEIQWI   | 180 |
| Giraffe | 121 | .....                                                         | 180 |
| Okapi   | 121 | .....                                                         | 180 |
|         |     |                                                               |     |
| Cow     | 181 | SNRYLDFSSKEVKDRIKSNVDGRYLDGVVFPSCCNPSRPRCIQYQLTNNSAHYSYDHQT   | 240 |
| Giraffe | 181 | .....                                                         | 240 |
| Okapi   | 181 | .....                                                         | 240 |
|         |     |                                                               |     |
| Cow     | 241 | EELNLWLRGCRAALLSYYSNLMNTTGAVTLLVWLFVETITVGLRYLHTALEGMANPEDPE  | 300 |
| Giraffe | 241 | .....N.....I.....I.....                                       | 300 |
| Okapi   | 241 | .....N.....I.....                                             | 300 |
|         |     |                                                               |     |
| Cow     | 301 | CESEGWLLEKSVPETWKAFLESVKKLGKGNQVEAEGEDAGQAPAAG                | 347 |
| Giraffe | 301 | .....S.....                                                   | 347 |
| Okapi   | 301 | .....S.....                                                   | 347 |

**Newick Tree of Mammalian PRPH2**

((((Human:0.00588561, Northern\_White-Cheeked\_Gibbon:0):0.000738324, Orangutan:0.00507583):0.00517584, (Baboon:0.0018958, (Angola\_Colobus:0.0030238, Drill:0.0086045):0.00100277):0.00214564):0.0214713, ((Vampire\_Bat:0, Black\_Flying\_Fox:0.00301012):0.0299616, (((Dog:0.0115878, ((Weddell\_Seal:0.00282626, Walrus:0.00297089):0.00615544, (Polar\_Bear:0.00927793, Panda:0.0111622):0.00708484):0.0021069, Ferret:0.015548):0.00158817):0.00829999, (Tiger:0.00497386, Cat:0.00665444):0.0202934):0.00184041, (((White\_Rhino:0.0162639, Horse:0.013068):0.00991163, Hedgehog:0.039621):0.00142509, (Mouse:0.0121093, Deer\_Mouse:0.0112857):0.0267635):0.00278664):0.00161864, (Aardvark:0.0242448, (Elephant:0.0166021, Manatee:0.0217036):0.00396617):0.0119554):0.00254992):0.00461297, ((Alpaca:0.000514034, (Camel:0, Bactrian\_Camelus:0.00296152):0.00820715):0.0264655, ((Sperm\_Whale:0.00617751, (Minke\_Whale:0.00976298, (Orca:0.00273464, Bottle-nose\_dolphin:0.000159718):0.00675668, Baji\_Dolphin:0.00782157):0.00192789):0.0010987):0.00927823, ((Cow:0.00123748, (Yak:0.00116035, Water\_Buffalo:0.0046368):0.00166535):0.00163245, ((Gerenuk:0.00436983, (Musimon\_Sheep:0, Tibetan\_Antelope:0.00291997):0.00143578):0.00357245, (Giraffe:0.00518775, Okapi:0.00352069):0.00962686):0.00127879):0.0245697):0.00432251):0.0106901):0.0214713);

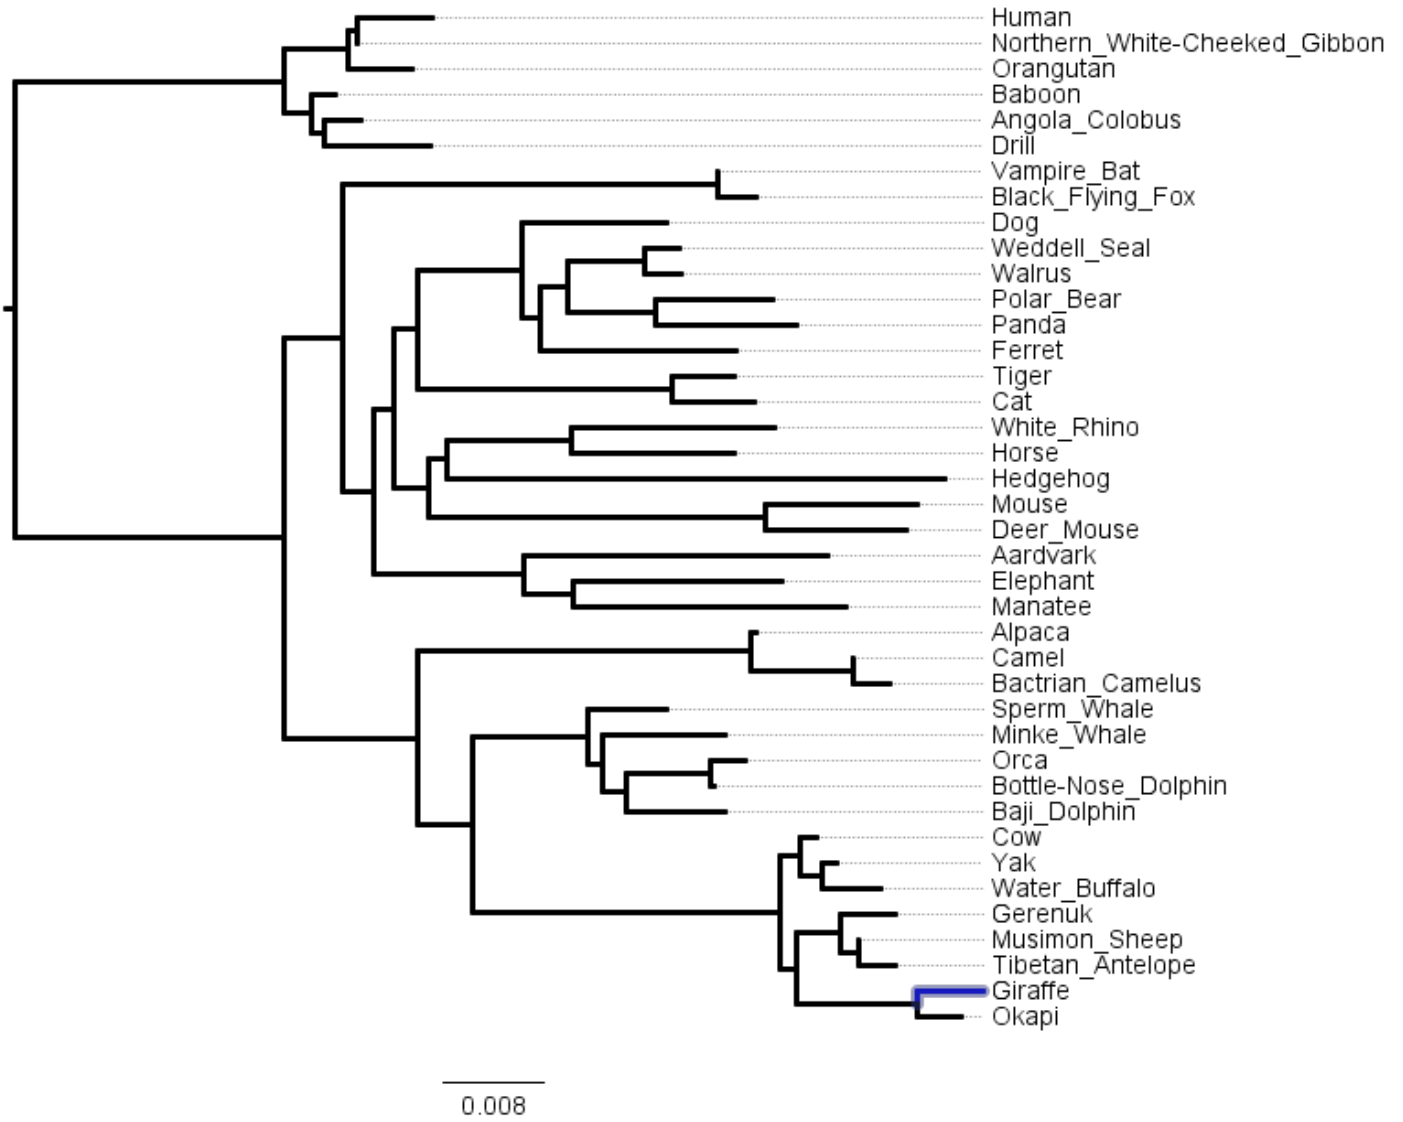

Locus Name: Peripherin PRPH2

**Locus Name: NF-X1-type zinc finger protein (NFXL1)**

ENSBTAT0000061348 NFXL1-201 NF-X1-type skeletal growth  
 mouse: reduced body length and short tibia

PP2: None  
 PSG: T616M

Giraffe: P441A UIS, PT615-616LM UIS with M(TS)UPS

**Protein sequence Alignment of Cow, Giraffe and Okapi NFXL1**

|               |     |                                                                 |     |
|---------------|-----|-----------------------------------------------------------------|-----|
| Water Buffalo | 1   | MEASWRQVAGGRGRARGRTAAPSSGNVHLRGAGGGREKGSVGAAGPGLSPGGAATPAA      | 60  |
| Giraffe       | 1   | .....A.....I...                                                 | 60  |
| Okapi         | 1   | .....A.G.....                                                   | 60  |
| Water Buffalo | 61  | AGSSARRCPAGSEAPQTSVAGELMSQKKFEEIKKANQAAAKKIVEEHFSSSEEGDED       | 120 |
| Giraffe       | 61  | ....G..S..R.....I.....                                          | 120 |
| Okapi         | 61  | ....G..S.....I.....                                             | 120 |
| Water Buffalo | 121 | EGKRGKIVANTFITYTTQTGDGDVRELERTKQYVNEAFQAGAMTCLICIASVKRNQAVWSC   | 180 |
| Giraffe       | 121 | .....T.....                                                     | 180 |
| Okapi         | 121 | .....T.....                                                     | 180 |
| Water Buffalo | 181 | SGFCFIFHMPCIQKWAKDSQFLVSSLTDDDFGKRDPWPCPKCRFEYKRSDTPSRYYCYC     | 240 |
| Giraffe       | 181 | .....                                                           | 240 |
| Okapi         | 181 | .....                                                           | 240 |
| Water Buffalo | 241 | GKVEDPPLDPWLVPHSCGQVCERDFKPCSGHKCLLLCHPGPCPPCKMVTTCYCKKAKP      | 300 |
| Giraffe       | 241 | .....P.....                                                     | 300 |
| Okapi         | 241 | .....P.....                                                     | 300 |
| Water Buffalo | 301 | IPRCSAKEWSCQLPCGRKLLCGQHKECNPCHAGSPPCPRVSRQKVCVCGKRVAERSCAS     | 360 |
| Giraffe       | 301 | .....S.....A.....                                               | 360 |
| Okapi         | 301 | .....A.....                                                     | 360 |
| Water Buffalo | 361 | PLWHCDQVCGKTLPCGNHTCEQVCHVGACGDCPRSGKRFCPCQKSKFSLPCTEDVPTCGD    | 420 |
| Giraffe       | 361 | .....                                                           | 420 |
| Okapi         | 361 | .....                                                           | 420 |
| Water Buffalo | 421 | SCDKVLECGIHRCSQRCHRGPCETCRQEVEKHCRCGKHTKRMPCCHKPYLCETKCVKMRDC   | 480 |
| Giraffe       | 421 | .....A.....                                                     | 480 |
| Okapi         | 421 | .....                                                           | 480 |
| Water Buffalo | 481 | QKHQCRKCCPGNCPDQNCGRITLGCNRHKCPSVCHRGSYPCPETVDVKCNCNGTKVT       | 540 |
| Giraffe       | 481 | .....                                                           | 540 |
| Okapi         | 481 | .....S.....                                                     | 540 |
| Water Buffalo | 541 | VPCGRERTTRPPKCKEQCSRPTCHHTSQEKHRCHFGSCPPCHQPCQKVLKCGHLCPAP      | 600 |
| Giraffe       | 541 | .....                                                           | 600 |
| Okapi         | 541 | .....                                                           | 600 |
| Water Buffalo | 601 | CHDQALIKQTGRHQPTGPWEQPSFAFIQTALPCPPCQVPIPMECLGKHEVSPLPCHAVG     | 660 |
| Giraffe       | 601 | .....LM.....                                                    | 660 |
| Okapi         | 601 | .....L.....                                                     | 660 |
| Water Buffalo | 661 | PYSCKRACGRITLTCQNHTCMKECHKVTETDSDTKKAGPECLHCEECSKSRPSGCPHP      | 720 |
| Giraffe       | 661 | .....V.....N.....                                               | 720 |
| Okapi         | 661 | .....V.....N.....T..                                            | 720 |
| Water Buffalo | 721 | CVLPCHPGECPPCVQMLRIKCHKITSLYVECRKITTADVNEKNLLSCCKNQCPKELPCG     | 780 |
| Giraffe       | 721 | .....I.....                                                     | 780 |
| Okapi         | 721 | .....I.....                                                     | 780 |
| Water Buffalo | 781 | HRCCKEMCHPGECPFNCNQKVKLRCPCPKRIKKEVQC�KVNRENQISIECDTTCKEMKQKASE | 840 |
| Giraffe       | 781 | .....R.....                                                     | 840 |
| Okapi         | 781 | .....R.....                                                     | 840 |

|               |     |                                                               |     |
|---------------|-----|---------------------------------------------------------------|-----|
| Water Buffalo | 841 | LKEAEAKAALEEEKRRQQAEELEAFENRLKGRRKKNRKRDEVAVELTLWQKYKYLLFPLCA | 900 |
| Giraffe       | 841 | .....                                                         | 900 |
| Okapi         | 841 | .....                                                         | 900 |
|               |     |                                                               |     |
| Water Buffalo | 901 | IVVVVFAWYIANAVD                                               | 915 |
| Giraffe       | 901 | V.....L...                                                    | 915 |
| Okapi         | 901 | .....L...                                                     | 915 |

**Newick Tree of Mammalian NFXL1**

```

(((Northern_White-Cheeked_Gibbon:0.00359942, (Human:0.00856959,
Orangutan:0.00803366):0.000796594):0.00387898, (Drill:0.00255115,
Mouse:0.00184931):0.0100495):0.0147522, (((Polar_Bear:0.00890291, (Walrus:0.00830195,
Weddell_Seal:0.0104325):0.0060435):0.00490846, (Tiger:0.0036526,
Cat:0.00291921):0.0186251):0.00768872, (White_Rhino:0.0203383,
Horse:0.017495):0.00639622):0.00200009, (((Baji_Dolphin:0.00819689,
'Orca]:0.00609741):0.00184553, (Minke_Whale:0.00741933,
Sperm_Whale:0.00909252):0.000375473):0.0136695, Alpaca:0.0245246):0.00224885,
((giraffe:0.0060733, okapi:0.00381162):0.00758221, ((gerenuk:0.00506027,
Musimon_Sheep:0.00592907):0.000498578, (cow:0.00199488,
Water_Buffalo:0.00348461):0.00280918):0.00297043):0.013462):0.00267698):0.0147522);

```

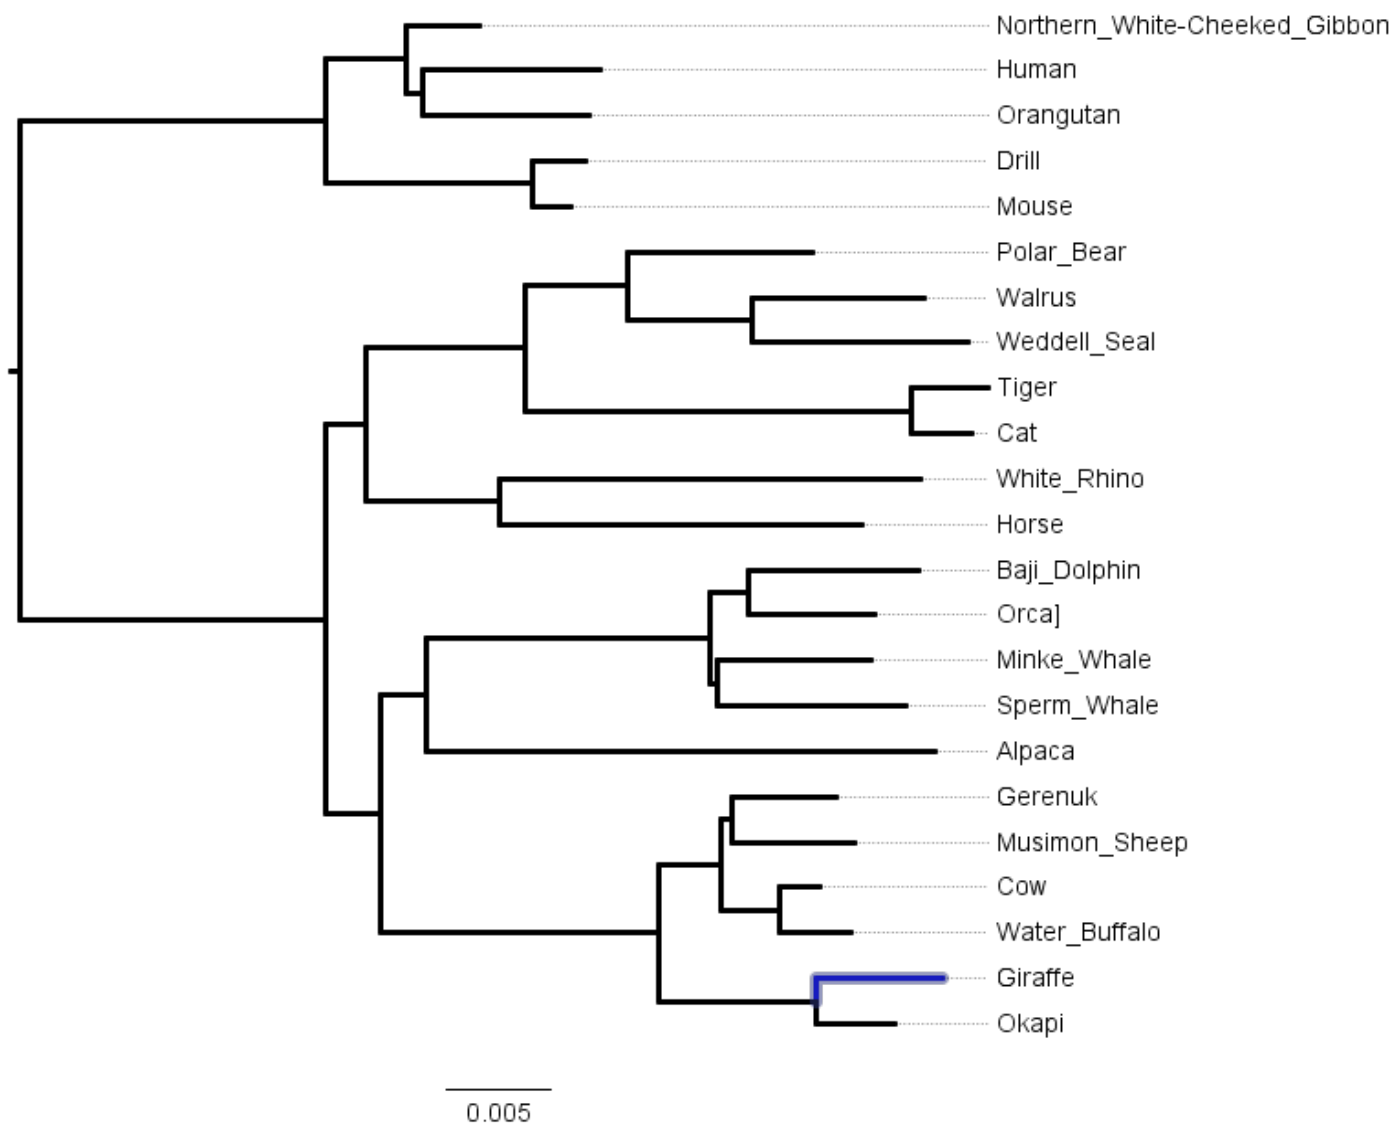

**Locus Name: NF-X1-type zinc finger protein (NFXL1)**

## Supplementary Table 1 Gene Annotations of giraffe and okapi

We used gene annotations for assemblies of the cow and dog genomes to identify putative coding regions for giraffe and okapi, as follows. We downloaded gene models for the cow assembly called bosTau4 from Ensembl ([www.ensembl.org](http://www.ensembl.org)). The union of all intervals annotated as coding, as well as 150 bp flanks, were used to extract sequence from the bosTau4 assembly, forming the mapping target. Giraffe reads were mapped to the target using lastz ([www.bx.psu.edu/miller\\_lab/dist/README.lastz-1.02.00/README.lastz-1.02.00a.html](http://www.bx.psu.edu/miller_lab/dist/README.lastz-1.02.00/README.lastz-1.02.00a.html)) Mapping required an alignment with at least 60% of the read length as matched bases, and at least 3 matches better than the second best alignment. Lastz scoring was as follows.

Nucleotide substitutions:

|   | A   | C   | G   | T   |
|---|-----|-----|-----|-----|
| A | 11  | -33 | -20 | -39 |
| C | -33 | 16  | -30 | -20 |
| G | -20 | -30 | 16  | -33 |
| T | -39 | -20 | -33 | 11  |

gap\_open\_penalty = 40, gap\_extend\_penalty = 4, hsp\_threshold = 300, x\_drop = 80 and y\_drop = 80. The analogous process was used to align reads to the dog canFam3 assembly. To allow for the additional evolutionary distance between giraffe and the assembly, we used the following, less stringent lastz scores.

Nucleotide substitutions:

|   | A   | C   | G   | T   |
|---|-----|-----|-----|-----|
| A | 11  | -22 | -10 | -28 |
| C | -22 | 15  | -20 | -10 |
| G | -10 | -20 | 15  | -22 |
| T | -28 | -10 | -22 | 11  |

gap\_open\_penalty = 30, gap\_extend\_penalty = 3, hsp\_threshold = 300, x\_drop = 60 and y\_drop = 60. The okapi reads were processed just as for giraffe.

## Supplementary Table 2 Genome Assemblies of giraffe and okapi

### Summary of genome assemblies of giraffe and okapi

|                                                       | <i>Giraffa camelopardalis tippelskirchi</i> |       | <i>Okapia johnstoni</i> |       |
|-------------------------------------------------------|---------------------------------------------|-------|-------------------------|-------|
| Assembly size (Gb)                                    | 2,92                                        |       | 3,28                    |       |
| GC-content %                                          | 41,5                                        |       | 42,3                    |       |
| Number of scaffolds                                   | 2051673                                     |       | 3721563                 |       |
| Total size of scaffolds (nt)                          | 2923614156                                  |       | 3279649410              |       |
| Longest scaffold (nt)                                 | 5618088                                     |       | 2167669                 |       |
| Number of scaffolds > 500 nt                          | 121921                                      | 5,90% | 191750                  | 5,20% |
| Number of scaffolds > 1K nt                           | 60763                                       | 3,00% | 106272                  | 2,90% |
| Number of scaffolds > 10K nt                          | 13235                                       | 0,60% | 27730                   | 0,70% |
| Number of scaffolds > 100K nt                         | 5782                                        | 0,30% | 7270                    | 0,20% |
| Number of scaffolds > 1M nt                           | 342                                         | 0,00% | 62                      | 0,00% |
| N50 scaffold length (nt)                              | 339613                                      |       | 104593                  |       |
| L50 scaffold count                                    | 2088                                        |       | 6933                    |       |
| scaffold %A                                           | 28,39                                       |       | 27,74                   |       |
| scaffold %C                                           | 20,17                                       |       | 20,3                    |       |
| scaffold %G                                           | 20,06                                       |       | 20,21                   |       |
| scaffold %T                                           | 28,08                                       |       | 27,41                   |       |
| scaffold %N                                           | 3,29                                        |       | 4,33                    |       |
| Percentage of assembly in scaffolded contigs          | 82,80%                                      |       | 69,90%                  |       |
| Ave. length of breaks (20 or more Ns) between contigs | 1170                                        |       | 1620                    |       |
| Number of contigs                                     | 2133680                                     |       | 3808993                 |       |
| Number of contigs in scaffolds                        | 101091                                      |       | 124674                  |       |
| Number of contigs not in scaffolds                    | 2032589                                     |       | 3684319                 |       |
| Total size of contigs (nt)                            | 2827601364                                  |       | 3137992281              |       |
| Longest contig (nt)                                   | 540046                                      |       | 592595                  |       |
| Number of contigs > 500 nt                            | 187457                                      | 8,80% | 251065                  | 6,60% |
| Number of contigs > 1K nt                             | 121879                                      | 5,70% | 159155                  | 4,20% |
| Number of contigs > 10K nt                            | 50330                                       | 2,40% | 54534                   | 1,40% |
| Number of contigs > 100K nt                           | 4159                                        | 0,20% | 3359                    | 0,10% |
| Number of contigs > 1M nt                             | 0                                           | 0,00% | 0                       | 0,00% |
| N50 contig length (Kb)                                | 47286                                       |       | 33770                   |       |
| L50 contig count                                      | 16327                                       |       | 22986                   |       |

### Mapping reads to genome assemblies of giraffe and okapi

|                                                                            | <i>Giraffa camelopardalis tippelskirchi</i> |                       |                       | <i>Okapia johnstoni</i> |                       |                       |
|----------------------------------------------------------------------------|---------------------------------------------|-----------------------|-----------------------|-------------------------|-----------------------|-----------------------|
|                                                                            | PE                                          | MP                    | Adaptor-clipped MP    | PE                      | MP                    | Adaptor-clipped MP    |
| Number of reads                                                            | 570222616                                   | 156989988             | 134919530             | 541205364               | 134600726             | 117136186             |
| Coverage (resp. mapped coverage)                                           | 29.26x<br>(28.44x)                          | 8.05x<br>(6.44x)      | 6.63x<br>(5.67x)      | 24.75x<br>(23.65x)      | 6.16x<br>(4.98x)      | 5.08x<br>(4.40x)      |
| Number of mapped reads (out of total)                                      | 563495089<br>(98.82%)                       | 155254040<br>(98.89%) | 134692225<br>(99.83%) | 537760172<br>(99.36%)   | 132951488<br>(98.77%) | 116902286<br>(99.80%) |
| Percentage of PCR duplicate reads*                                         | N/A                                         | 43,00%                | N/A                   | N/A                     | 64,00%                | N/A                   |
| Insert size average (bp)                                                   | 527.4                                       | 4610.1                | 4630,4                | 541.9                   | 4271                  | 4274,8                |
| Insert size standard deviation (bp)                                        | 132.4                                       | 3623                  | 3623,7                | 157.2                   | 3584.4                | 3591,3                |
| Number of reads in pairs that map to the same scaffold                     | 518811698                                   | 110023320             | 107539588             | 447699474               | 81993204              | 80146978              |
| Number of reads in pairs that map to the same scaffold in PE orientation** | 518139122<br>(99.87%)                       | 44469980<br>(40.42%)  | 43154754<br>(40.13%)  | 445077876<br>(99.41%)   | 34908928<br>(42.58%)  | 34157932<br>(42.62%)  |
| Number of reads in pairs mapping to the same scaffold in MP orientation**  | 672576<br>(0.13%)                           | 65553340<br>(59.58%)  | 64384834<br>(59.87%)  | 2621598<br>(0.59%)      | 47084276<br>(57.42%)  | 45989046<br>(57.38%)  |
| Mismatch rate (over all mapped bases)                                      | 1.11%                                       | 0.26%                 | 0.16%                 | 0.63%                   | 0.44%                 | 0.30%                 |

Prepared MP libraries are MP that have been processed by the NextClip software, then given to the assembler instead of the original MP contamination in MP libraries.

Coverage is the total number of bases in the reads, divided by the genome size. Mapped coverage is the number of mapped bases, divided

\*as detected by NextClip software \*\* out of all reads mapping to the same scaffold





**Supplementary Table 4 Genes exhibiting positive selection in giraffe and okapi****giraffe: over (+) under (-) representation**

| <b>Biological Process</b>             | <b>P value</b> |
|---------------------------------------|----------------|
| lysosomal transport                   | + 0.023        |
| natural killer cell activation        | + 0.023        |
| immune response                       | + 0.029        |
| angiogenesis                          | + 0.033        |
| protein ADP-ribosylation              | + 0.035        |
| blood circulation                     | + 0.037        |
| response to pheromone                 | + 0.046        |
| nervous system development            | - 0.046        |
| protein phosphorylation               | - 0.052        |
| cellular defense response             | + 0.055        |
| neuronal action potential propagation | + 0.057        |
| sex determination                     | + 0.057        |
| protein metabolic process             | - 0.075        |
| mRNA transcription                    | + 0.089        |
| cell-matrix adhesion                  | + 0.091        |
| mRNA processing                       | - 0.101        |
| response to stimulus                  | + 0.108        |
| mitochondrion organization            | + 0.111        |
| mitochondrial transport               | + 0.111        |
| macrophage activation                 | + 0.12         |
| cellular protein modification process | - 0.127        |
| mRNA splicing via spliceosome         | - 0.147        |
| anion transport                       | + 0.148        |
| immune system process                 | + 0.149        |
| B cell mediated immunity              | + 0.164        |
| ectoderm development                  | - 0.171        |
| cell communication                    | - 0.171        |
| antigen processing and presentation   | + 0.2          |
| protein transport                     | - 0.209        |
| lipid metabolic process               | + 0.212        |
| RNA catabolic process                 | + 0.218        |

**okapi: over (+) under (-) representation**

| <b>Biological Process</b>                       | <b>P value</b> |
|-------------------------------------------------|----------------|
| nervous system development                      | - 0.03         |
| protein methylation                             | + 0.063        |
| sensory perception of taste                     | + 0.075        |
| phosphate-containing compound metabolic process | + 0.087        |
| cellular amino acid metabolic process           | - 0.095        |
| sensory perception of pain                      | + 0.098        |
| sensory perception of chemical stimulus         | + 0.098        |
| cell adhesion                                   | + 0.106        |
| biological adhesion                             | + 0.106        |
| mitochondrion organization                      | + 0.121        |
| mitochondrial transport                         | + 0.121        |
| steroid metabolic process                       | + 0.123        |
| ectoderm development                            | - 0.124        |
| muscle organ development                        | - 0.125        |
| cholesterol metabolic process                   | + 0.128        |
| localization                                    | - 0.129        |
| glycolysis                                      | + 0.133        |
| system development                              | - 0.135        |
| transport                                       | - 0.151        |
| cell-cell signaling                             | - 0.156        |
| protein metabolic process                       | + 0.156        |
| regulation of liquid surface tension            | + 0.166        |
| transcription DNA-dependent                     | - 0.173        |
| antigen processing and presentation             | + 0.176        |
| Unclassified                                    | + 0.178        |
| transcription from RNA polymerase II promoter   | - 0.179        |
| exocytosis                                      | + 0.18         |
| proteolysis                                     | + 0.185        |
| protein acetylation                             | + 0.187        |
| developmental process                           | - 0.189        |
| blood circulation                               | + 0.191        |

**Supplementary Table 5 Genes exhibiting multiple signs of adaptation (MSA) in giraffe**

| Gene <sup>1</sup> | Protein Function                 | Stage Tissue/Organ/Function                                   | Protein Divergence <sup>2</sup><br>branch length | Substitutions at                   |          | PolyphenZ<br>PRD <sup>4</sup><br>number | PSG <sup>5</sup> |
|-------------------|----------------------------------|---------------------------------------------------------------|--------------------------------------------------|------------------------------------|----------|-----------------------------------------|------------------|
|                   |                                  |                                                               |                                                  | Fixed Sites <sup>3</sup><br>number | p-value  |                                         |                  |
| HOXB3             | homeobox transcription factor    | segmental identity, anterior axial skeleton, angiogenesis     | G-mammals                                        | G-2US;<br>GO-3US                   | n.s.     | GO-1PRD                                 | n.s.             |
| HOXB13            | homeobox transcription factor    | segmental identity, posterior axial skeleton, angiogenesis    | GO-mammals                                       | GO-5US,<br>4aadel                  | n.s.     | GO-3PRD                                 | n.s.             |
| CDX4              | homeobox transcription factor    | segmental identity, posterior axial skeleton, heart develop.  | GO-cetartiodactyls                               | G-2US,<br>GO-1US                   | n.s.     | G-1PRD,<br>GO-1PRD                      | n.s.             |
| NOTO              | homeobox transcription factor    | embryonic somitogenesis,                                      | G-mammals                                        | G-2US,<br>GO-2US                   | n.s.     | G-2PRD,<br>GO-2PRD                      | n.s.             |
| JAG1              | Notch ligand                     | vertebrae development, cardiovascular, eye, kidney            | G-mammals                                        | G-2US,<br>GO-6US                   | n.s.     | GO-1PRD                                 | n.s.             |
| DLL3              | Notch ligand                     | embryonic somitogenesis                                       | GO-cetartiodactyls                               | G-1US,<br>GO-4US                   | n.s.     | GO-3PRD                                 | n.s.             |
| NOTCH4            | notch pathway                    | mesoderm development, angiogenesis, neurogenesis              | G-mammals                                        | G-8US,<br>O?                       | n.s.     | G-3PRD,<br>GO-1PRD                      | n.s.             |
| FGFRL1            | decoy FGF receptor               | cranofacial, axial & appendic. skeleton, heart, kidney        | G-cetartiodactyls                                | G-7US;<br>GO-1US                   | 4.00E-06 | G-3PRD                                  | 7<br>P< 0.09     |
| FOLR1             | folate receptor                  | embryogenesis, folate homeostasis                             | G-cetartiodactyls                                | G-3US                              | n.s.     | G-2PRD                                  | 5*               |
| PDCD2L            | transcriptional repressor        | programmed cell death                                         | G-pecorans                                       | G-3US;<br>GO-1US                   | n.s.     | G-2PRD                                  | n.s.             |
| MYC               | transcription factor             | cell proliferation, growth control, oncogene                  | GO-mammals                                       | G-3US,<br>GO-2US                   | n.s.     | G-1PRD,<br>GO-3PRD                      | n.s.             |
| E2F5              | transcription factor             | cell proliferation, growth control, brain                     | G-mammals                                        | G-4US,<br>GO-1US                   | 0.00011  | GO-2PRD                                 | n.s.             |
| E2F4              | transcription factor             | cell proliferation, growth control, cranofacial, erythroid    | G-pecorans                                       | G-2US,<br>GO-1US                   | n.s.     | G-1 PRD                                 | n.s.             |
| ETS2              | ETS transcription factor         | somitogenesis, heart development                              | G-mammals                                        | GO-1US                             | n.s.     | n.s.                                    | n.s.             |
| TGFB1             | secreted growth factor           | growth control, bone growth, heart                            | G-cetartiodactyls                                | G-1US                              | n.s.     | n.s.                                    | 5*               |
| ALDH16A1          | aldehyde dehydrogenase           | eye development                                               | GO-mammals                                       | G-3US                              | n.s.     | G-3PRD,<br>GO-1PRD                      | n.s.             |
| FHL5              | Four-half lim domains            | testis, heart, brain                                          | G-pecorans                                       | G-2US,<br>GO-1US                   | n.s.     | G-1 PRD                                 | 2*               |
| ITGA10            | integrin alpha 10                | heart, muscle articular cartilage                             | G-mammals                                        | G-2US,<br>GO-2US                   | n.s.     | G-1 PRD                                 | n.s.             |
| ECM1              | extracellular matrix protein     | endochondral bone formation and angiogenesis                  | G-cetartiodactyls                                | G-1US,<br>GO-2US                   | n.s.     | G-3PRD,<br>GO-2PRD                      | n.s.             |
| TTYH2             | chloride channel                 | growth control, development                                   | G-cetartiodactyls                                | G-2US,<br>GO-1US                   | n.s.     | G-1PRD,<br>GO-1PRD                      | 1*               |
| CREBBP            | CBP histone acetylase            | angiogenesis, skeletal growth, regulates Hox protein activity | G-mammals                                        | G-3US,<br>GO-US                    | n.s.     | G-3PRD                                  | n.s.             |
| PTGES2            | prostaglandin E synthase         | heart, brain regulates smooth muscle contraction              | G-pecorans                                       | G-1US                              | n.s.     | G-1 PRD                                 | n.s.             |
| IFT74             | intraflagellar transport protein | ciliogenesis kidney, heart, lung                              | G-pecorans                                       | G-2US,<br>GO-2US                   | n.s.     | G-1 PRD                                 | n.s.             |
| ABHD2             | abhydroloase                     | smooth muscle cell migration                                  | G-cetartiodactyls                                | G-1US                              | n.s.     | G-1PRD                                  | n.s.             |

|         |                                            |                                                            |                    |                              |          |                    |             |
|---------|--------------------------------------------|------------------------------------------------------------|--------------------|------------------------------|----------|--------------------|-------------|
| ENG     | endoglin                                   | regulation of angiogenesis                                 | unremarkable       | G-1US                        | n.s.     | G-1PRD,<br>GO-5PRD | n.s.        |
| SEMA3E  | semaphorin 3E                              | regulates angiogenesis and neuronal synaptogenesis in eye  | G-cetartiodactyls  | G-1US,<br>GO-3US             | n.s.     | G-1 PRD            | n.s.        |
| JARID2  | modulates histone methyltransferase        | heart and nervous system development                       | GO-mammals         | GO-4US                       | n.s.     | GO-3PRD            | n.s.        |
| CYP27B1 | 25-hydroxyvitamin D-1 alpha hydroxylase    | bone development and calcium metabolism                    | unremarkable       | G-1US,<br>GO-1US             | n.s.     | n.s.               | 1*          |
| NFXL1   | NF-X1-type                                 | skeletal growth                                            | G-cetartiodactyls  | G-2US                        | n.s.     | n.s.               | 1*          |
| AXIN2   | negative regulator of Wnt signaling        | embryonic somitogenesis and skeletal development           | unremarkable       | G-2US &<br>5aadel,<br>GO-2US | n.s.     | GO-2PRD            | n.s.        |
|         |                                            |                                                            |                    |                              |          |                    |             |
| RCAN3   | inhibits calcineurin A, binds troponin     | heart, brain, skeletal muscle, kidney, language SNP humans | G-mammals          | G-7US                        | 3.70E-06 | G-3PRD             | n.s.        |
| BORG1   | rho GTPase inhibit CDC42                   | heart                                                      | G-mammals          | G-1US                        | 0.00216  | n.s.               | 6<br>P<0.09 |
| UTS2B   | urotensin 2, vasoconstrictor               | regulates blood pressure in the brain                      | Giraffe>okapi      | G-1US                        | n.s.     | G-2PRD,<br>GO-1PRD | n.s.        |
| ADRA1A  | adrenergic receptor                        | regulation of blood pressure                               | unremarkable       | G-1US                        | n.s.     | G-1PRD             | 1*          |
| ADRA2B  | adrenergic receptor                        | regulation of vasoconstriction                             | GS-mammals         | G-3US,<br>GO-1US             | 0.00203  | n.s.               | n.s.        |
| ACE     | angiotensin I converting enzyme            | regulation of blood pressure                               | unremarkable       | G-3US,<br>GO-1US             | n.s.     | G-2PRD,<br>GO-1PRD | n.s.        |
|         |                                            |                                                            |                    |                              |          |                    |             |
| SSTR2   | somatostatin receptor                      | behavior, eye, pancreas                                    | G-mammals          | G-2US,<br>GO-1US             | 0.00836  | n.s.               | n.s.        |
| FSCN1   | fascin, organizes filamentous actin        | nervous system, eye                                        | G-mammals          | G-4US                        | n.s.     | G-2PRD             | n.s.        |
| NF2     | merlin regulator of hippo pathway          | auditory functions                                         | G-mammals          | G-4US                        | n.s.     | n.s.               | n.s.        |
| CHRNA10 | neuronal acetylcholine receptor            | auditory functions, pain reception                         | G-pecorans         | G-2US                        | n.s.     | G-1PRD             | n.s.        |
| SLIT2   | secreted axon guidance replusive protein   | axonal guidance in the nervous system                      | G-cetartiodactyls  | G-2US,<br>GO-1US             | n.s.     | n.s.               | n.s.        |
| SEMA3A  | semaphorin 3A                              | axonal guidance                                            | GO-cetartiodactyls | G-2US,<br>GO-3US             | n.s.     | G-1PRD             | n.s.        |
| MOXD1   | monoxygenase dopamine $\beta$ -hydroxylase | dopamine metabolism                                        | unremarkable       | G-1US,<br>GO-1US             | n.s.     | n.s.               | 1*          |
| PRPH2   | perpherin-2                                | visual function                                            | G-mammals          | G-1US                        | n.s.     | n.s.               | 1*          |
| ALDH5A1 | succinic semialdehyde dehydrogenase        | brain, clearance of GABA and hydroxybutyric acid           | G-cetartiodactyls  | G-1US                        | n.s.     | G-2PRD             | n.s.        |
| MTHFD1  | C-1-tetrahydrofolate synthase              | folate metabolism                                          | G-mammals          | G-5US,<br>GO-1US             | n.s.     | G-1PRD             | n.s.        |
| SLC17A1 | phosphate-sodium cotransporter             | kidney                                                     | G-mammals          | G-1US,<br>GO-1US             | n.s.     | G-1PRD,<br>GO-5PRD | n.s.        |
| HIBADH  | 3-hydroxyisobutyrate dehydrogenase         | mitochondrial, amino acid degradation                      | G-cetartiodactyls  | G-1US                        | n.s.     | G-1PRD             | n.s.        |
| MCT1    | monocarboxylate transporter                | rumen epithelium, transport volatile fatty acids, butyrate | G-mammals          | G-3US,<br>GO-1US             | 0.045    | G-1PRD             | n.s.        |

|          |                                               |                                                       |                   |                        |         |                   |      |
|----------|-----------------------------------------------|-------------------------------------------------------|-------------------|------------------------|---------|-------------------|------|
| ACSM3    | acyl-CoA synthetase medium-chain              | mitochondrial                                         | G-cetartiodactyls | G-1US, GO-4US          | n.s.    | n.s.              | n.s. |
| ACADS    | acyl-CoA dehydrogenase short chain            | mitochondrial                                         | GO-mammals        | G-1US, GO-3US          | n.s.    | n.s.              | n.s. |
| NDUFB8   | NADH dehydrogenase-ubiquinone subunit         | mitochondria electron transport                       | G-cetartiodactyls | G-2US                  | n.s.    | G-1PRD, GO-1PRD   | n.s. |
| SDHB     | succinate dehydrogenase ubiquinone complex II | mitochondria electron transport and citric acid cycle | G-mammals         | G-2US                  | n.s.    | GO-1PRD           | n.s. |
| PRR19    | proline rich protein 19                       | secreted tannin binding protein                       | G-cetartiodactyls | G-1US                  | n.s.    | G-2PRD            | 1*   |
| MRP10    | ribosomal L10 protein                         | mitochondrial protein synthesis                       | unremarkable      | G-1US                  | n.s.    | G-1PRD            | 1*   |
| MDC1     | mediator DNA damage checkpoint                | dsDNA break repair, scaffold                          | G-mammals         | G-6US, GO-3US 264aadel | n.s.    | G-13PRD, GO-15PRD | n.s. |
| EXO1     | exonuclease 1                                 | DNA mismatch repair, essential for meiosis            | G-cetartiodactyls | G-7US, GO-3US          | n.s.    | G-1PRD            | n.s. |
| Nibrin   | component of MRN complex                      | dsDNA break repair, chromosome integrity              | G-cetartiodactyls | G-4US                  | n.s.    | G-2PRD            | n.s. |
| MRE11    | component of MRN complex                      | dsDNA break repair, chromosome integrity              | G-cetartiodactyls | G-3US                  | n.s.    | n.s.              | 1*   |
| SOSB2    | component of SOSS complex                     | dsDNA break repair, chromosome integrity              | G-mammals         | G-2US, GO-1US          | 0.02544 | G-1PRD, GO-1PRD   | n.s. |
| NUDT15   | 8-oxo-dGTP diphosphatase                      | DNA repair                                            | G-pecorans        | G-2US                  | n.s.    | G-2PRD            | n.s. |
| SAC3D1   | SAC3 domain containing protein                | centrosome duplication and mitotic progression        | unremarkable      | G-3US, GO-1US          | n.s.    | G-2PRD            | n.s. |
| HAUS2    | centrosomal protein 27                        | centrosome assembly, cytokinesis                      | G-mammals         | G-1US, GO-3US          | n.s.    | G-1PRD, GO-1PRD   | n.s. |
| RCCD1    | histone demethylase complex                   | chromosome segregation                                | G-mammals         | G-2US                  | n.s.    | G-1PRD, GO-3PRD   | n.s. |
| HAUS6    | mitotic spindle assembly                      | centrosome integrity cytokinesis                      | Pecorans>>mammals | G-5US, GO-6US          | n.s.    | G-3PRD, GO-5PRD   | 1*   |
|          |                                               |                                                       |                   |                        |         |                   |      |
| ARHGAP15 | Rho GTPase-activating protein                 | trypanosome resistance                                | G-mammals         | G-2US                  | n.s.    | n.s.              | n.s. |
| LPO      | lactoperoxidase                               | antibacterial in milk                                 | unremarkable      | G-2US, GO-2US          | n.s.    | G-6PRD, GO-2PRD   | n.s. |
| SEMA7A   | semaphorin 7A                                 | cell migration, adhesion, immune response             | unremarkable      | G-3US, GO-2US          | n.s.    | n.s.              | 1*   |
| REL      | v-rel oncogene                                | lymphocyte and ketatinocytes growth and development   | G-cetartiodactyls | G-6US                  | 0.00127 | G-1PRD, GO-1PRD   | 1*   |
| PACRGL   | E3 ubiquitin protein ligase parkin-like       | unknown substrate expressed in brain                  | G-cetartiodactyls | G-2US, GO-1US          | n.s.    | G-1PRD            | n.s. |

Abbreviations: G=giraffe, O=okapi, GO= giraffe and okapi, m=mouse, h=human, US=unique substitution at a fixed site in other mammals, PRD=probably damaging polyphen 2 score, PSG=positively selected genes using branch-site test

SNP=single nucleotide polymorphism, GWAS=genome wide association study, n.s.=not statistically significant

<sup>1</sup> Homologous cattle transcript identification is listed in Supplementary Figure 1.

- <sup>2</sup> Protein divergence is the relative branch length of giraffe (G) compared to other species on the phylogenetic protein tree. For example "G-mammals" means that giraffe has the longest branch length among all mammals compared. See Supplementary Figure 1 for gene trees. Phylogenetic tree analysis was by PhyML likelihood-based tree-searching algorithm and n=100 bootstrapping.
- <sup>3</sup> Unique substitutions at fixed sites refers to amino acid substitutions in giraffe and/or okapi that at sites that are otherwise fixed for another amino acid in all other mammals compared. number of US sites = the number of US positions in the specific protein. p-value for US = are proteins that display an a larger number of unique amino acid substitutions at fixed sites than expected as compared to other mammals.
- <sup>4</sup> Polyphen2 PRD = amino acid substitutions in giraffe and/or okapi that are predicted to be "probably damaging" or probably alter function-structure of the protein
- <sup>5</sup> PSG = positive selected sites as determined by branch-site test. PSG test was performed using the coding sequences giraffe and okapi and all mammalian species of high quality in the public databases of NCBI and Ensembl. The number of positively selected sites and overall statistical significance are given.

**Supplementary Table 6 Survey of major developmental genes for evidence of significant changes in giraffe compared to other eutherians**

| Gene Cluster/Pathway | Gene           | Survey results based on amino acid sequence divergence and attributes of amino acid substitutions |
|----------------------|----------------|---------------------------------------------------------------------------------------------------|
| Homeobox Genes       | HoxA1          | Unremarkable                                                                                      |
| Homeobox Genes       | HoxA2          | Unremarkable                                                                                      |
| Homeobox Genes       | HoxA3          | Unremarkable                                                                                      |
| Homeobox Genes       | HoxA4          | Unremarkable                                                                                      |
| Homeobox Genes       | HoxA5          | Conserved (with okapi and cow)                                                                    |
| Homeobox Genes       | HoxA6          | Conserved (with okapi and cow)                                                                    |
| Homeobox Genes       | HoxA7          | Unremarkable                                                                                      |
| Homeobox Genes       | HoxA9          | Unremarkable                                                                                      |
| Homeobox Genes       | HoxA10         | Unremarkable                                                                                      |
| Homeobox Genes       | HoxA11         | Unremarkable                                                                                      |
| Homeobox Genes       | HoxA13         | Unremarkable                                                                                      |
| Homeobox Genes       | Even-skipped   | Unremarkable                                                                                      |
| Homeobox Genes       | HoxB1          | Unremarkable                                                                                      |
| Homeobox Genes       | HoxB2          | Unremarkable                                                                                      |
| Homeobox Genes       | HoxB3          | Remarkable                                                                                        |
| Homeobox Genes       | HoxB4          | Unremarkable                                                                                      |
| Homeobox Genes       | HoxB5          | Unremarkable                                                                                      |
| Homeobox Genes       | HoxB6          | Conserved (with okapi and cow)                                                                    |
| Homeobox Genes       | HoxB7          | Unremarkable                                                                                      |
| Homeobox Genes       | HoxB8          | Conserved (with okapi and cow)                                                                    |
| Homeobox Genes       | HoxB9          | Conserved (with okapi and cow)                                                                    |
| Homeobox Genes       | HoxB13         | Remarkable                                                                                        |
| Homeobox Genes       | HoxC4          | Unremarkable                                                                                      |
| Homeobox Genes       | HoxC5          | Conserved (with okapi and cow)                                                                    |
| Homeobox Genes       | HoxC6          | Conserved (with okapi and cow)                                                                    |
| Homeobox Genes       | HoxC8          | Conserved (with okapi and cow)                                                                    |
| Homeobox Genes       | HoxC9          | Conserved (with okapi and cow)                                                                    |
| Homeobox Genes       | HoxC10         | Unremarkable                                                                                      |
| Homeobox Genes       | HoxC11         | Unremarkable                                                                                      |
| Homeobox Genes       | HoxC12         | Unremarkable                                                                                      |
| Homeobox Genes       | HoxC13         | Unremarkable                                                                                      |
| Homeobox Genes       | HoxD1          | Unremarkable                                                                                      |
| Homeobox Genes       | HoxD3          | Unremarkable                                                                                      |
| Homeobox Genes       | HoxD4          | Unremarkable                                                                                      |
| Homeobox Genes       | HoxD8          | Unremarkable                                                                                      |
| Homeobox Genes       | HoxD9          | Remarkable                                                                                        |
| Homeobox Genes       | HoxD10         | Unremarkable                                                                                      |
| Homeobox Genes       | HoxD11         | Unremarkable                                                                                      |
| Homeobox Genes       | HoxD12         | Unremarkable                                                                                      |
| Homeobox Genes       | HoxD13         | Unremarkable                                                                                      |
| Homeobox Genes       | Even-skipped 2 | Unremarkable                                                                                      |

|                     |         |                                |
|---------------------|---------|--------------------------------|
| Homeobox Genes      | CDX1    | Unremarkable                   |
| Homeobox Genes      | CDX2    | Unremarkable                   |
| Homeobox Genes      | CDX4    | Remarkable                     |
| Homeobox Genes      | Meox1   | Unremarkable                   |
| Homeobox Genes      | Meox2   | Unremarkable                   |
| Homeobox Genes      | TBX18   | Unremarkable                   |
| Homeobox Genes      | PBX1    | Conserved (with okapi and cow) |
| Homeobox Genes      | MEIS1   | Conserved (with okapi and cow) |
| Homeobox Genes      | NKX3-2  | Unremarkable                   |
| Homeobox Genes      | NKX3-1  | Unremarkable                   |
| Homeobox Genes      | LDB1    | Conserved (with okapi and cow) |
| Homeobox Genes      | SHOX2   | Remarkable                     |
| Homeobox Genes      | CREBBP  | Remarkable                     |
| Homeobox Genes      | IRX6    | Unremarkable                   |
| Homeobox Genes      | NOTO    | Remarkable                     |
| Homeobox Genes      | PRRX1   | Unremarkable                   |
| TGF $\beta$ Pathway |         |                                |
| TGF $\beta$ Pathway | BMP4    | Unremarkable                   |
| TGF $\beta$ Pathway | BMP5    | Unremarkable                   |
| TGF $\beta$ Pathway | TGFB1   | Remarkable                     |
| TGF $\beta$ Pathway | TGFBR2  | Unremarkable                   |
| TGF $\beta$ Pathway | GDF8    | Unremarkable                   |
| FGF Pathway         |         |                                |
| FGF Pathway         | FGF8    | Conserved (with okapi and cow) |
| FGF Pathway         | FGF19   | Unremarkable                   |
| FGF Pathway         | FGFR2   | Unremarkable                   |
| FGF Pathway         | FGFR3   | Unremarkable                   |
| FGF Pathway         | FGFR4   | Unremarkable                   |
| FGF Pathway         | FGF4    | Unremarkable                   |
| FGF Pathway         | FGF3    | Unremarkable                   |
| FGF Pathway         | FGFR1   | Unremarkable                   |
| FGF Pathway         | FGFRL1  | Remarkable                     |
| FGF Pathway         | TCF15   | Unremarkable                   |
| FGF Pathway         | FGF21   | Unremarkable                   |
| FGF Pathway         | FGF1    | Unremarkable                   |
| FGF Pathway         | DUSP6   | Unremarkable                   |
| FGF Pathway         | FRS2    | Unremarkable                   |
| FGF Pathway         | GRB2    | Conserved (with okapi and cow) |
| FGF Pathway         | SOS1    | Conserved (with okapi and cow) |
| FGF Pathway         | BCL2L11 | Unremarkable                   |
| FGF Pathway         | EFNA1   | Unremarkable                   |
| FGF Pathway         | EPHB3   | Unremarkable                   |
| FGF Pathway         | HSPG2   | Unremarkable                   |
| FGF Pathway         | SHH     | Unremarkable                   |
| FGF Pathway         | PTPN11  | Unremarkable                   |
| FGF Pathway         | GAB1    | Unremarkable                   |
| FGF Pathway         | RAS     | Unremarkable                   |
| FGF Pathway         | RAF1    | Unremarkable                   |



|                        |          |                                         |
|------------------------|----------|-----------------------------------------|
| FGF Pathway            | FGF2     | Unremarkable                            |
| FGF Pathway            | Sprouty2 | Unremarkable                            |
| FGF Pathway            | Perlecan | Unremarkable                            |
| WNT Signalling Pathway |          |                                         |
| WNT Signalling Pathway | WNT3A    | Unremarkable                            |
| WNT Signalling Pathway | MYC      | Remarkable                              |
| WNT Signalling Pathway | Rock1    | Unremarkable                            |
| WNT Signalling Pathway | ZIC1     | Unremarkable                            |
| WNT Signalling Pathway | VDR      | Unremarkable                            |
| WNT Signalling Pathway | AXIN2    | Remarkable                              |
| WNT Signalling Pathway | FZD7     | Unremarkable - missing sequence         |
| WNT Signalling Pathway | FZD5     | Unremarkable - missing sequence         |
| WNT Signalling Pathway | CDC73    | Conserved (with okapi and cow)          |
| WNT Signalling Pathway | PHLDA1   | Sequencing missing in giraffe and okapi |
| WNT Signalling Pathway | DVL2     | Unremarkable                            |
| WNT Signalling Pathway | HDAC9    | Unremarkable - missing sequence         |
| WNT Signalling Pathway | DACT1    | Unremarkable - missing sequence         |
| WNT Signalling Pathway | TNFRSF19 | Unremarkable - missing sequence         |
| WNT Signalling Pathway | FZD3     | Unremarkable                            |
| WNT Signalling Pathway | HAS2     | Conserved (with okapi and cow)          |
| WNT Signalling Pathway | PPP2R1A  | Unremarkable                            |
| WNT Signalling Pathway | APC      | Unremarkable                            |
| WNT Signalling Pathway | SMAD4    | Unremarkable                            |
| WNT Signalling Pathway | LRP5     | Unremarkable                            |
| WNT Signalling Pathway | DKK1     | Unremarkable                            |
| WNT Signalling Pathway | FRZB     | Unremarkable                            |
| WNT Signalling Pathway | TCF15    | Unremarkable                            |
| WNT Signalling Pathway | FZD1     | Unremarkable                            |
| WNT Signalling Pathway | CtBP1    | Unremarkable                            |
| WNT Signalling Pathway | FZD9     | Unremarkable                            |
| WNT Signalling Pathway | FZD4     | Unremarkable                            |
| WNT Signalling Pathway | SMARCA5  | Unremarkable                            |
| WNT Signalling Pathway | CER1     | Unremarkable                            |
| WNT Signalling Pathway | DVL1     | Unremarkable                            |
| WNT Signalling Pathway | GSK3A    | Unremarkable                            |
| WNT Signalling Pathway | GSK3B    | Unremarkable                            |
| WNT Signalling Pathway | SP5      | Conserved (with okapi and cow)          |
| Notch Pathway          |          |                                         |
| Notch Pathway          | DTX3L    | Unremarkable                            |
| Notch Pathway          | MESP2    | Unremarkable                            |
| Notch Pathway          | LFNG     | Unremarkable                            |
| Notch Pathway          | MFNG     | Unremarkable                            |
| Notch Pathway          | DLL1     | Unremarkable                            |
| Notch Pathway          | DLL3     | Remarkable                              |
| Notch Pathway          | JAG1     | Remarkable                              |
| Notch Pathway          | DLL4     | Unremarkable                            |
| Notch Pathway          | APH1B    | Unremarkable                            |
| Notch Pathway          | HES7     | Unremarkable                            |

|                  |         |                                |
|------------------|---------|--------------------------------|
| Notch Pathway    | Ripply2 | Unremarkable                   |
| Notch Pathway    | PSN1    | Unremarkable                   |
| Notch Pathway    | PSN2    | Unremarkable                   |
| Notch Pathway    | Notch1  | Unremarkable                   |
| Notch Pathway    | Notch4  | Remarkable                     |
| Notch Pathway    | Notch2  | Unremarkable                   |
| Notch Pathway    | DLK1    | Unremarkable                   |
| Notch Pathway    | DLK2    | Unremarkable                   |
| Notch Pathway    | NUMBL1  | Unremarkable                   |
| Notch Pathway    | HES7    | Unremarkable                   |
| Notch Pathway    | HEY2    | Unremarkable                   |
| Notch Pathway    | PSEN1   | Unremarkable                   |
| Notch Pathway    | HES1    | Unremarkable                   |
| Notch Pathway    | MESP2   | Unremarkable                   |
| Notch Pathway    | NKD1    | Unremarkable                   |
| Notch Pathway    | RTF1    | Unremarkable                   |
| Notch Pathway    | NRARP   | Conserved (with okapi and cow) |
| Hedgehog Pathway |         |                                |
| Hedgehog Pathway | CDX2    | Unremarkable                   |
| Hedgehog Pathway | SHH     | Unremarkable                   |
| Hedgehog Pathway | GLI3    | Unremarkable                   |
| Hedgehog Pathway | SMO     | Unremarkable                   |
| Hedgehog Pathway | TRPS1   | Unremarkable                   |
| Hedgehog Pathway | IHH     | Unremarkable                   |
| Hedgehog Pathway |         |                                |
| Others           |         |                                |
| Others           | Sox9    | Unremarkable                   |
